# Supplementary material for: BRCA1 through Its E3 Ligase Activity Regulates the Transcription Factor Oct1 and Carbohydrate Metabolism
Source: Oxford University Press journal article supplement (doi:10.1158/1541-7786.mcr-17-0364), 2018-01-12
Supplement: 15417786mcr170364-sup-186202_2_supp_4378405_wz2pwg.xlsx [file 15417786mcr170364-sup-186202_2_supp_4378405_wz2pwg.xlsx]

## Sheet: README
Vázquez-Arreguín et al Supplementary Table S2: RNAseq gene expression changes in BRCA1-I26A mutant MEFs (Oct1 CRISPR vs control)
Column Descriptions:
Gene/Region info:
IGV HyperLink	Click each to reposition a running instance of IGV, http://software.broadinstitute.org/software/igv/
Alt Name	Alternative name for this gene/region
Coordinates	Chromosome : Start of the gene/region - end of the gene/region
Strand	Strand of the gene/region
Total BPs	Total base pairs of gene/region after masking for overlapping annotations if so indicated
Max Abs Lg2Rto	Maximum absolute log2 ratio observed
Max DESeq2 AdjPval	Maximum observed AdjP between any pairwise comparisons. Note the MaxAbsLg2Rto and MaxDESeq2AdjP may be from different comparisons. Column may be present.
Max DESeq2 -10Lg10(AdjPval)	Maximum observed -10Log10(AdjP) between any pairwise comparisons. Note the MaxAbsLg2Rto and MaxDESeq2AdjP may be from different comparisons.
	All p-values and AdjPs in USeq output, both printed and in graph form have been phred transformed where the value is actually -10*Log10(AdjP or pval).
	Thus -10*Log10(0.001) = 30, -10*Log10(0.01) = 20, -10*Log10(0.05) = 13, and -10*Log10(0.1) = 10. To convert back in Excel, =10^(A1/-10) replace A1 with the phred containing cell.
For each Paired Comparison:
Lg2Rto	DESeq2's log2 ratio for differential expression.
AdjPval	DESeq2's p-value after Benjamini and Hochberg multiple testing correction. No phred transformation. May be present.
-10Lg10(AdjPval)	DESeq2's p-value after both Benjamini and Hochberg multiple testing correction and phred transformation e.g. -10Lg10(AdjPval)
Spli Lg2Rto	The maximum log2 ratio difference between two conditions and a gene's exon after correcting for differences in counts. Use this to gauge the degree of potential differential splicing.
Spli AdjPval	Chi-square test of independence between two conditions and a gene's exons that contain 5 or more counts. A Bonferroni correction is applied to the p-values. May be present.
Spli -10Lg10(AdjPval)	Chi-square test of independence between two conditions and a gene's exons that contain 5 or more counts. A Bonferroni correction and phred transformation is applied to the p-values.
Spli Coor	Coordinates of the exon displaying the SpliLg2Rto.
For each Replica:
Counts	Number of alignments that overlap a given gene/region by at least one base pair. Paired alignments are only counted once. Alignments that span a gene/region but don't actually touch down are ignored.
RLog	Per gene/region regularized log counts when using DESeq2. Use these for subsequent PCA and clustering analysis. Not present with SamSeq analysis.
FPKM	Transformed count data normalized to library size and gene/region length (counts/ exonicBasesPerKB/ millionTotalMappedReadsToGeneTable)
control = BRCA1-I26A MEFs infected with lentiviruses containing Cas9 and a nonspecific gRNA
treatment = BRCA1-I26A MEFs infected with lentiviruses containing Cas9 and a gRNA targeting Oct1

## Sheet: Analyzed Genes
Vázquez-Arreguín et al Supplementary Table S2: RNAseq gene expression changes in BRCA1-I26A mutant MEFs (Oct1 CRISPR vs control)
IGV HyperLink	Alt Name	Coor mm10	Strand	Total BPs	Max Abs Lg2Rto	Max DESeq2 AdjPVal	Max DESeq2 -10Lg10(AdjPVal)	Lg2Rto Treatment_Control	AdjPval Treatment_Control	-10Lg10(AdjPval) Treatment_Control	Spli Lg2Rto Treatment_Control	Spli AdjPVal Treatment_Control	Spli -10Lg10(AdjPVal) Treatment_Control	Spli Coor Treatment_Control	Counts Treatment0	Counts Treatment1	Counts Treatment2	Counts Treatment3	Counts Control0	Counts Control1	Counts Control2	Counts Control3	RLog Treatment0	RLog Treatment1	RLog Treatment2	RLog Treatment3	RLog Control0	RLog Control1	RLog Control2	RLog Control3	FPKM Treatment0	FPKM Treatment1	FPKM Treatment2	FPKM Treatment3	FPKM Control0	FPKM Control1	FPKM Control2	FPKM Control3
ENSMUSG00000027559	Car3	chr3:14863537-14872351	+	1507	5.8213	3.76461e-184	1834.24	5.8213	3.76461e-184	1834.24	0	1	0	-	784	815	718	618	3	11	6	4	8.72328	8.81757	8.70793	8.58759	6.39138	6.47976	6.45991	6.45084	22.8961	25.2469	22.6637	19.794	0.0865354	0.325005	0.195757	0.135854
ENSMUSG00000037206	Islr	chr9:58156264-58159221	-	2354	5.63044	8.87975e-188	1870.52	5.63044	8.87975e-188	1870.52	0	1	0	-	780	854	692	649	10	13	5	4	8.73348	8.87819	8.68781	8.64936	6.49	6.52441	6.47384	6.47612	14.583	16.9361	13.9836	13.3075	0.184663	0.245894	0.104434	0.0869717
ENSMUSG00000032327	Stra6	chr9:58063787-58153996	+	5829	4.5494	1.2261e-90	899.115	4.5494	1.2261e-90	899.115	0	1	0	-	276	278	222	221	3	7	2	7	7.16001	7.21081	7.0466	7.0607	5.73733	5.7848	5.74822	5.81803	2.08389	2.22646	1.81167	1.83002	0.0223724	0.0534705	0.01687	0.0614651
ENSMUSG00000016024	Lbp	chr2:158306492-158332852	+	4831	4.37488	3.37536e-223	2224.72	4.37488	3.37536e-223	2224.72	-1.43762	0.0766873	11.1528	chr2:158309600-158310512	880	908	826	734	33	49	20	30	8.99442	9.08116	9.00317	8.9136	6.931	7.05336	6.86869	6.97308	8.01688	8.77429	8.13324	7.33359	0.296936	0.451616	0.20355	0.31784
ENSMUSG00000026185	Igfbp5	chr1:72857931-72874884	-	6006	4.08005	1.15527e-170	1699.37	4.08005	1.15527e-170	1699.37	0	1	0	-	699	713	592	575	27	49	20	27	8.65108	8.72431	8.56449	8.55964	6.73806	6.91095	6.72015	6.79992	5.12214	5.54201	4.68875	4.62105	0.195418	0.363263	0.163728	0.230093
ENSMUSG00000061535	C1qtnf7	chr5:43515568-43618817	+	4136	3.84995	1.71669e-98	977.653	3.84995	1.71669e-98	977.653	0	1	0	-	363	330	348	255	11	20	21	12	7.63564	7.60459	7.65959	7.4278	6.11092	6.20165	6.24364	6.165	3.86265	3.72475	4.00239	2.97589	0.115611	0.215308	0.249642	0.1485
ENSMUSG00000030247	Kcnj8	chr6:142564938-142571356	-	2188	3.84384	8.14965e-61	600.889	3.84384	8.14965e-61	600.889	0	1	0	-	188	183	191	129	2	13	3	6	6.61568	6.63622	6.67545	6.42964	5.48801	5.60818	5.51822	5.56181	3.78155	3.90451	4.15247	2.84577	0.0397346	0.264549	0.0674143	0.140355
ENSMUSG00000025934	Gsta3	chr1:21240588-21265361	+	1392	3.58403	1.45509e-121	1208.37	3.58403	1.45509e-121	1208.37	0	1	0	-	610	481	454	444	32	54	26	23	8.4083	8.24851	8.20985	8.21114	6.66331	6.83062	6.65669	6.64583	19.2864	16.1313	15.5145	15.3958	0.999302	1.72729	0.918359	0.845694
ENSMUSG00000030306	Tmtc1	chr6:148232429-148444389	-	8578	3.57676	1.87164e-61	607.278	3.57676	1.87164e-61	607.278	0	1	0	-	154	163	160	168	8	11	7	7	6.46368	6.5375	6.53388	6.58196	5.54671	5.58017	5.55755	5.56587	0.790122	0.887084	0.887267	0.945325	0.0405406	0.0570975	0.0401227	0.0417673
ENSMUSG00000041329	Atp1b2	chr11:69599735-69605942	-	4085	3.55484	3.70665e-56	554.31	3.55484	3.70665e-56	554.31	0	1	0	-	175	194	132	148	14	9	6	3	6.54123	6.65082	6.40494	6.49196	5.59879	5.55086	5.5374	5.50968	1.88541	2.21704	1.5371	1.74875	0.148978	0.0980981	0.0722167	0.0375884
ENSMUSG00000073418	C4b	chr17:34728379-34743882	-	5695	3.51465	2.24259e-60	596.492	3.51465	2.24259e-60	596.492	0	1	0	-	192	179	168	137	9	14	10	4	6.65129	6.6421	6.60794	6.49013	5.59871	5.65188	5.63283	5.57297	1.48377	1.46731	1.40325	1.16114	0.0686965	0.109457	0.0863345	0.0359493
ENSMUSG00000039323	Igfbp2	chr1:72824502-72852474	+	1847	3.31401	2.54307e-164	1635.95	3.31401	2.54307e-164	1635.95	0	1	0	-	903	938	685	760	74	90	70	58	9.11269	9.20452	8.92439	9.04208	7.36564	7.45775	7.40092	7.34835	21.5169	23.7082	17.6419	19.8612	1.74161	2.16963	1.86341	1.60726
ENSMUSG00000054146	Krt15	chr11:100131757-100135928	-	1767	3.3099	1.64924e-51	507.827	3.3099	1.64924e-51	507.827	0	1	0	-	192	140	136	134	10	9	5	14	6.5642	6.3946	6.38476	6.38987	5.52857	5.52084	5.49573	5.60364	4.78216	3.69875	3.66119	3.66038	0.246008	0.226786	0.139127	0.405524
ENSMUSG00000006342	Susd2	chr10:75636618-75644008	-	3255	3.29829	8.58922e-75	740.66	3.29829	8.58922e-75	740.66	0	1	0	-	270	258	217	204	14	21	22	16	7.22023	7.22933	7.11013	7.08233	5.98077	6.04965	6.08917	6.04277	3.65067	3.70026	3.17124	3.02508	0.186966	0.287262	0.332315	0.25159
ENSMUSG00000022132	Cldn10	chr14:118787907-118875489	+	2591	3.22718	1.02705e-34	339.884	3.22718	1.02705e-34	339.884	0	1	0	-	86	80	102	67	2	7	3	3	5.50289	5.49503	5.62487	5.43017	4.86368	4.91844	4.88672	4.8915	1.4608	1.4414	1.87264	1.24815	0.0335543	0.120293	0.0569288	0.0592623
ENSMUSG00000020486	4-Sep	chr11:87568902-87590539	+	3563	3.17903	5.84944e-145	1442.33	3.17903	5.84944e-145	1442.33	0	1	0	-	591	555	489	473	51	55	47	52	8.47426	8.47052	8.37114	8.36297	6.93381	6.96604	6.95671	7.01209	7.30014	7.27177	6.5285	6.40771	0.622215	0.687317	0.648575	0.746985
ENSMUSG00000070803	Cited4	chr4:120666562-120667820	+	1258	3.13632	1.33934e-44	438.731	3.13632	1.33934e-44	438.731	0	1	0	-	176	169	138	116	3	18	14	8	6.51421	6.52486	6.40281	6.31217	5.46694	5.62081	5.6051	5.5494	6.15732	6.27147	5.21818	4.45077	0.103664	0.637092	0.547174	0.325487
ENSMUSG00000026365	Cfh	chr1:140085854-140183411	-	6852	3.11895	1.50076e-54	538.237	3.11895	1.50076e-54	538.237	-1.23103	1.5273e-09	88.1608	chr1:140162944-140163136	2196	2223	2120	1826	117	250	186	148	10.4492	10.5212	10.4875	10.3632	8.22261	8.64297	8.52906	8.42842	14.105	15.1456	14.7177	12.863	0.742257	1.62455	1.33467	1.10553
ENSMUSG00000036596	Cpz	chr5:35502214-35525698	-	2248	3.07785	3.02802e-101	1005.19	3.07785	3.02802e-101	1005.19	0	1	0	-	673	643	482	453	45	65	54	62	8.63393	8.64583	8.40209	8.36922	6.94325	7.07873	7.05591	7.13022	13.1758	13.353	10.1993	9.72657	0.870166	1.28744	1.18107	1.41163
ENSMUSG00000024245	Tmem178	chr17:80944631-81001816	+	1696	3.06835	6.59953e-34	331.805	3.06835	6.59953e-34	331.805	0	1	0	-	90	90	73	80	5	7	7	1	5.54708	5.57478	5.48087	5.53432	4.9223	4.94471	4.9584	4.89414	2.33548	2.47731	2.04747	2.27678	0.128153	0.183773	0.202932	0.0301786
ENSMUSG00000029675	Eln	chr5:134703780-134747241	-	2583	3.05054	1.83789e-107	1067.36	3.05054	1.83789e-107	1067.36	0	1	0	-	428	420	353	347	39	44	43	35	7.99992	8.03315	7.8998	7.90518	6.63649	6.67825	6.71275	6.66718	7.29254	7.59081	6.50086	6.4843	0.656336	0.75847	0.818507	0.693535
ENSMUSG00000003545	Fosb	chr7:19302720-19310045	-	3751	3.01912	3.60894e-66	654.426	3.01912	3.60894e-66	654.426	-2.12612	1.25001e-06	59.0309	chr7:19309304-19310044	361	379	290	222	31	36	34	21	7.68899	7.77676	7.57093	7.38597	6.38645	6.43092	6.45263	6.35218	4.23565	4.71689	3.67766	2.85669	0.359253	0.427332	0.445667	0.286548
ENSMUSG00000025422	Agap2	chr10:127078906-127093169	+	5633	2.96196	3.99997e-56	553.979	2.96196	3.99997e-56	553.979	0	1	0	-	210	203	182	153	16	17	25	15	6.87605	6.89241	6.82579	6.72585	5.84982	5.86238	5.9643	5.87941	1.64074	1.68236	1.53692	1.31102	0.123471	0.134375	0.218212	0.136294
ENSMUSG00000066026	Dhrs3	chr4:144892826-144928209	+	2927	2.93758	1.8456e-234	2337.34	2.93758	1.8456e-234	2337.34	0	1	0	-	5661	5217	4599	4283	621	728	457	594	11.8608	11.8389	11.7256	11.6788	9.92817	10.0519	9.8001	10.0112	85.1197	83.2073	74.7414	70.629	9.22263	11.0744	7.67665	10.387
ENSMUSG00000042826	Fgf11	chr11:69796067-69801857	-	3044	2.92066	1.23259e-32	319.092	2.92066	1.23259e-32	319.092	0	1	0	-	94	114	81	73	8	6	6	7	5.67492	5.80708	5.6359	5.59787	5.05934	5.04057	5.05421	5.07158	1.35907	1.74833	1.26579	1.15754	0.114243	0.0877641	0.0969136	0.1177
ENSMUSG00000079343	Gm5077	chr6:124624624-124636085	-	2662	2.90633	1.25224e-31	309.023	2.90633	1.25224e-31	309.023	0	1	0	-	92	84	69	81	6	9	3	6	5.55802	5.54088	5.45624	5.54052	4.93593	4.96816	4.91665	4.95612	1.52104	1.47311	1.233	1.46871	0.0979781	0.150537	0.0554104	0.115363
ENSMUSG00000040170	Fmo2	chr1:162874316-162898726	-	5545	2.90275	3.88375e-31	304.107	2.90275	3.88375e-31	304.107	0	1	0	-	78	100	82	69	7	7	4	6	5.48792	5.63716	5.54359	5.47433	4.95321	4.95491	4.93511	4.96328	0.619088	0.841902	0.703449	0.600628	0.054876	0.0562091	0.035468	0.0553827
ENSMUSG00000062960	Kdr	chr5:75932826-75978458	-	7278	2.89424	4.19415e-156	1553.77	2.89424	4.19415e-156	1553.77	0	1	0	-	702	760	650	649	93	99	86	61	8.83606	8.96202	8.83227	8.85252	7.42952	7.46613	7.45443	7.33089	4.24507	4.87489	4.24836	4.30418	0.555465	0.605666	0.580985	0.428985
ENSMUSG00000027574	Nkain4	chr2:180934771-180954699	-	1239	2.8813	9.61873e-136	1350.17	2.8813	9.61873e-136	1350.17	0	1	0	-	617	633	529	502	73	78	65	63	8.60205	8.67746	8.53043	8.50568	7.18518	7.2197	7.19385	7.20248	21.9166	23.8504	20.3098	19.5565	2.56117	2.80307	2.57941	2.60252
ENSMUSG00000033910	Gucy1a3	chr3:82092427-82145877	-	4653	2.86864	4.23454e-103	1023.73	2.86864	4.23454e-103	1023.73	0	1	0	-	453	461	467	377	40	63	54	54	8.16105	8.22567	8.24839	8.08785	6.77674	6.93615	6.92397	6.9438	4.28474	4.62521	4.77424	3.9108	0.373691	0.602862	0.57061	0.593998
ENSMUSG00000026399	Cd55	chr1:130439026-130462744	-	4853	2.86739	4.99037e-157	1563.02	2.86739	4.99037e-157	1563.02	0	1	0	-	1445	1425	1347	1119	158	218	175	118	9.88332	9.92743	9.88637	9.7326	8.16647	8.36377	8.29579	8.10691	13.1044	13.7078	13.2032	11.1295	1.41525	2.00012	1.77299	1.2445
ENSMUSG00000025491	Ifitm1	chr7:140967220-140969825	+	1094	2.79873	2.21364e-25	246.549	2.79873	2.21364e-25	246.549	0	1	0	-	93	71	76	44	7	4	3	5	5.39292	5.29328	5.32956	5.12219	4.77948	4.75002	4.74912	4.77653	3.74132	3.02973	3.30458	1.9413	0.278142	0.162799	0.134829	0.233925
ENSMUSG00000000142	Axin2	chr11:108920348-108950783	+	5506	2.79202	7.65526e-49	481.16	2.79202	7.65526e-49	481.16	0	1	0	-	190	168	153	163	14	31	17	13	6.73801	6.69409	6.64202	6.69821	5.76744	5.92053	5.82372	5.79382	1.51872	1.42441	1.32183	1.42892	0.110529	0.250689	0.151807	0.120846
ENSMUSG00000021250	Fos	chr12:85473889-85477273	+	2352	2.76727	3.04821e-157	1565.16	2.76727	3.04821e-157	1565.16	0	1	0	-	2094	2137	1771	1486	251	320	232	209	10.4306	10.5097	10.3389	10.1933	8.69347	8.85995	8.72017	8.68472	39.1831	42.4161	35.818	30.4957	4.63898	6.05791	4.84986	4.54814
ENSMUSG00000086040	Wipf3	chr6:54429602-54503768	+	7114	2.7434	9.65699e-42	410.152	2.7434	9.65699e-42	410.152	0	1	0	-	139	134	142	110	16	17	11	14	6.31288	6.325	6.36835	6.23144	5.56263	5.57476	5.53734	5.57756	0.859925	0.879335	0.9495	0.74634	0.097767	0.106401	0.0760251	0.100725
ENSMUSG00000033453	Adamts15	chr9:30899154-30922452	-	5928	2.70028	1.81381e-18	177.414	2.70028	1.81381e-18	177.414	0	1	0	-	36	33	26	34	0	0	1	1	4.06313	4.05449	3.99983	4.07185	3.74494	3.74537	3.76042	3.76235	0.267272	0.259878	0.208634	0.27684	0	0	0.00829412	0.00863409
ENSMUSG00000017390	Aldoc	chr11:78322967-78327781	+	3263	2.69872	2.84653e-67	665.457	2.69872	2.84653e-67	665.457	0	1	0	-	404	376	364	305	55	48	24	62	7.94321	7.93211	7.91658	7.7936	6.75007	6.70831	6.56057	6.86821	5.44909	5.3794	5.30646	4.5117	0.732709	0.65499	0.361637	0.972522
ENSMUSG00000049538	Adamts16	chr13:70727801-70841811	-	6836	2.68093	2.25814e-34	336.462	2.68093	2.25814e-34	336.462	0	1	0	-	105	135	95	115	13	13	9	14	6.00598	6.17988	5.99037	6.10694	5.38579	5.38826	5.36633	5.42722	0.676	0.921924	0.661062	0.811995	0.0826661	0.0846743	0.064732	0.104822
ENSMUSG00000042988	Notum	chr11:120653787-120661175	-	2408	2.60779	4.25194e-23	223.714	2.60779	4.25194e-23	223.714	0	1	0	-	76	83	64	52	2	12	6	4	5.30461	5.37071	5.26032	5.18747	4.73485	4.83783	4.78989	4.77226	1.38905	1.60911	1.26428	1.04233	0.0361043	0.221889	0.12251	0.0850214
ENSMUSG00000025083	Afap1l2	chr19:56912360-57008228	-	5591	2.60686	2.47314e-181	1806.07	2.60686	2.47314e-181	1806.07	-1.01814	1	0	chr19:56922936-56923040	959	986	901	868	148	162	113	147	9.33954	9.4205	9.34951	9.33739	7.93982	7.99857	7.86483	8.03251	7.54899	8.23286	7.66577	7.49356	1.15069	1.29014	0.993727	1.34571
ENSMUSG00000020140	Lgr5	chr10:115450310-115587780	-	10264	2.60414	2.26432e-46	456.451	2.60414	2.26432e-46	456.451	0	1	0	-	167	162	191	155	17	29	21	22	6.68887	6.70629	6.82493	6.70142	5.83814	5.94563	5.90452	5.92598	0.716076	0.73682	0.885191	0.728908	0.0719976	0.125803	0.100596	0.109706
ENSMUSG00000021069	Pygl	chr12:70190810-70231488	-	3828	2.57057	1.25503e-27	269.013	2.57057	1.25503e-27	269.013	0	1	0	-	74	99	90	81	13	8	11	6	5.57154	5.73813	5.69603	5.65557	5.12384	5.07705	5.12348	5.07605	0.850784	1.20733	1.11838	1.02134	0.147624	0.0930525	0.141286	0.0802239
ENSMUSG00000044337	Ackr3	chr1:90203979-90216751	+	3348	2.55888	1.34704e-26	258.706	2.55888	1.34704e-26	258.706	0	1	0	-	80	83	92	67	12	5	9	9	5.53506	5.57848	5.63539	5.49748	5.04401	4.97619	5.03174	5.03835	1.05163	1.15733	1.30714	0.965933	0.155805	0.0664959	0.132171	0.137588
ENSMUSG00000028197	Col24a1	chr3:145292471-145552011	+	7621	2.55252	9.04246e-58	570.437	2.55252	9.04246e-58	570.437	0	1	0	-	280	241	236	198	38	34	42	24	7.35748	7.28891	7.28336	7.17468	6.32706	6.30094	6.39986	6.26444	1.61698	1.47628	1.47306	1.25404	0.216749	0.198645	0.270967	0.161185
ENSMUSG00000031548	Sfrp1	chr8:23411501-23449632	+	4372	2.55037	2.32874e-36	356.329	2.55037	2.32874e-36	356.329	0	1	0	-	8099	8528	9492	6480	816	1520	1089	855	12.4554	12.5688	12.6928	12.3306	10.483	10.9523	10.7727	10.6274	81.5288	91.0605	103.276	71.5406	8.11327	15.4801	12.2469	10.0095
ENSMUSG00000089961	Gm16567	chr6:124530910-124542310	+	576	2.53626	1.99324e-146	1457	2.53626	1.99324e-146	1457	0	1	0	-	2079	1978	1974	1748	275	411	322	240	10.4765	10.4863	10.4979	10.4036	8.82917	9.1085	9.01071	8.84876	158.852	160.312	163.022	146.479	20.7537	31.7709	27.486	21.3262
ENSMUSG00000027562	Car2	chr3:14886425-14900769	+	1789	2.52137	5.34519e-30	292.72	2.52137	5.34519e-30	292.72	0	1	0	-	107	113	93	92	10	21	7	12	5.93265	5.99281	5.89612	5.90237	5.27831	5.38305	5.26575	5.32649	2.63229	2.9487	2.47282	2.48219	0.242983	0.52266	0.192383	0.343317
ENSMUSG00000028600	Podn	chr4:108014790-108096445	-	4270	2.51165	3.35564e-73	724.742	2.51165	3.35564e-73	724.742	-1.06187	1	0	chr4:108025512-108025608	351	322	291	268	43	47	52	48	7.7472	7.72503	7.65659	7.61177	6.59102	6.62426	6.70135	6.69108	3.61775	3.52039	3.2418	3.02946	0.43775	0.490095	0.598761	0.575358
ENSMUSG00000021508	Cxcl14	chr13:56288646-56296551	-	1823	2.50788	1.04268e-124	1239.82	2.50788	1.04268e-124	1239.82	0	1	0	-	1063	1074	934	934	128	192	187	141	9.4877	9.55298	9.43569	9.45809	7.9312	8.16482	8.21446	8.07571	25.6629	27.503	24.3714	24.7296	3.05217	4.68948	5.04351	3.95874
ENSMUSG00000023224	Serping1	chr2:84765386-84775444	-	2325	2.49891	1.367e-37	368.642	2.49891	1.367e-37	368.642	0	1	0	-	2886	2837	2561	2214	306	520	391	251	10.9162	10.9588	10.871	10.752	9.05822	9.43018	9.2995	9.0398	54.6302	56.9639	52.3971	45.9634	5.72117	9.95842	8.2686	5.52555
ENSMUSG00000086825	Gm15675	chr1:130429780-130437191	-	3681	2.487	1.10822e-19	189.554	2.487	1.10822e-19	189.554	0	1	0	-	51	64	67	44	1	8	4	7	4.93886	5.04605	5.07054	4.92013	4.51916	4.59274	4.56123	4.5993	0.609767	0.811666	0.865824	0.576959	0.0118092	0.0967686	0.0534284	0.0973323
ENSMUSG00000038521	C1s	chr6:124530344-124542359	-	3129	2.48518	2.01007e-171	1706.97	2.48518	2.01007e-171	1706.97	0	1	0	-	6232	6023	5943	5154	903	1281	946	792	12.0924	12.1185	12.1191	12.0014	10.4039	10.6807	10.5244	10.4249	87.656	89.8608	90.3484	79.5054	12.5449	18.2286	14.865	12.9552
ENSMUSG00000022763	Aifm3	chr16:17489610-17507485	+	4688	2.47452	2.93047e-21	205.331	2.47452	2.93047e-21	205.331	0	1	0	-	64	60	56	49	5	5	5	8	5.05895	5.05544	5.0337	4.99295	4.59876	4.60003	4.61019	4.64803	0.60083	0.597485	0.568226	0.504506	0.0463627	0.047489	0.0524398	0.0873428
ENSMUSG00000020427	Igfbp3	chr11:7206085-7213923	-	3130	2.46837	5.35008e-43	422.716	2.46837	5.35008e-43	422.716	0	1	0	-	20107	20310	19937	16206	2560	4137	2331	2392	13.7729	13.8446	13.8399	13.6548	11.9366	12.3262	11.9522	12.0046	282.724	302.921	302.995	249.913	35.5534	58.8507	36.6165	39.1148
ENSMUSG00000029005	Draxin	chr4:148098436-148130698	-	5200	2.45198	1.47341e-15	148.317	2.45198	1.47341e-15	148.317	0	1	0	-	29	31	41	25	3	1	1	0	4.01415	4.04347	4.12489	4.00133	3.78211	3.76186	3.76621	3.75629	0.245445	0.278305	0.37506	0.232057	0.0250786	0.00856262	0.00945529	0
ENSMUSG00000044921	Rassf9	chr10:102512221-102546560	+	2118	2.43148	8.6183e-34	330.646	2.43148	8.6183e-34	330.646	-1.04208	1	0	chr10:102512224-102512584	165	166	126	115	17	28	25	12	6.54152	6.582	6.41984	6.38061	5.70111	5.79992	5.80262	5.68758	3.42861	3.65886	2.82986	2.62077	0.348906	0.58863	0.580353	0.289988
ENSMUSG00000019846	Lama4	chr10:38965514-39110188	+	12068	2.42162	3.03667e-57	565.176	2.42162	3.03667e-57	565.176	-1.2168	1.75466e-23	227.558	chr10:39005412-39007396	2150	2071	2100	1647	266	401	360	263	10.5228	10.5446	10.5718	10.3603	8.82754	9.10858	9.10597	8.92532	7.84084	8.01139	8.2776	6.58743	0.958147	1.47951	1.46671	1.11544
ENSMUSG00000030329	Pianp	chr6:124996693-125003096	+	2753	2.39614	4.75277e-26	253.231	2.39614	4.75277e-26	253.231	0	1	0	-	102	104	95	101	10	15	24	5	5.91755	5.95748	5.91696	5.9611	5.28981	5.33978	5.44547	5.26171	1.63062	1.76356	1.64149	1.77081	0.157899	0.242602	0.428631	0.0929584
ENSMUSG00000031239	Itm2a	chrX:107397098-107403376	-	1744	2.39078	1.55751e-256	2558.08	2.39078	1.55751e-256	2558.08	0	1	0	-	2197	2049	2083	1772	392	372	336	369	10.5772	10.5677	10.5972	10.4646	9.13034	9.10352	9.10572	9.20164	55.4425	54.8477	56.815	49.0428	9.7707	9.49744	9.47264	10.8294
ENSMUSG00000031722	Hp	chr8:109575129-109579172	-	1343	2.36512	1.15585e-45	449.371	2.36512	1.15585e-45	449.371	0	1	0	-	314	290	355	227	37	71	42	45	7.63938	7.62302	7.79325	7.4682	6.52659	6.75796	6.60755	6.64767	10.2899	10.0806	12.574	8.15845	1.1976	2.35392	1.53763	1.71499
ENSMUSG00000097960	A330074K22Rik	chr8:120204433-120228230	-	2489	2.36002	2.14633e-24	236.683	2.36002	2.14633e-24	236.683	0	1	0	-	93	94	85	83	12	12	4	20	5.74732	5.78084	5.73745	5.73706	5.18722	5.18941	5.12186	5.29519	1.64444	1.76306	1.62448	1.60957	0.209576	0.214668	0.0790157	0.411273
ENSMUSG00000042834	Nrep	chr18:33437018-33464029	-	2513	2.33967	1.06729e-154	1539.72	2.33967	1.06729e-154	1539.72	-1.13714	1	0	chr18:33463376-33463748	1341	1353	1299	1113	240	269	190	249	9.86814	9.93304	9.90751	9.78529	8.50072	8.58292	8.43225	8.63149	23.4853	25.1344	24.5888	21.3777	4.1515	4.76617	3.7174	5.07144
ENSMUSG00000038146	Notch3	chr17:32120819-32166880	-	8044	2.32631	1.5259e-59	588.165	2.32631	1.5259e-59	588.165	0	1	0	-	288	323	316	293	56	54	38	67	7.61673	7.74986	7.74325	7.70288	6.70841	6.70087	6.62793	6.8503	1.57572	1.87454	1.86868	1.75814	0.302623	0.298904	0.232268	0.426312
ENSMUSG00000032332	Col12a1	chr9:79598990-79718831	-	15234	2.3129	2.27245e-240	2396.44	2.3129	2.27245e-240	2396.44	-1.64348	2.28712e-115	1146.41	chr9:79712536-79715472	4929	5465	5194	4876	1071	1065	817	981	11.8274	11.9893	11.9525	11.9141	10.4877	10.4934	10.3706	10.5427	14.2398	16.7471	16.2184	15.4493	3.05606	3.11276	2.63686	3.29594
ENSMUSG00000027015	Cybrd1	chr2:71117922-71142926	+	5339	2.295	7.41781e-72	711.297	2.295	7.41781e-72	711.297	-1.29291	1	0	chr2:71117920-71118312	411	394	374	302	76	81	62	54	8.04608	8.05945	8.02805	7.87749	6.99049	7.0246	6.9606	6.92735	3.38798	3.44508	3.33221	2.73026	0.618785	0.675515	0.570966	0.517677
ENSMUSG00000034059	Ypel4	chr2:84734057-84738655	+	2614	2.28562	2.18191e-23	226.612	2.28562	2.18191e-23	226.612	0	1	0	-	88	86	87	62	10	14	11	12	5.63459	5.65058	5.6625	5.52076	5.08467	5.12478	5.11268	5.13038	1.48162	1.53588	1.58319	1.14484	0.166295	0.238469	0.206902	0.234963
ENSMUSG00000031661	Nkd1	chr8:88521343-88594887	+	4459	2.24738	4.21143e-46	453.756	2.24738	4.21143e-46	453.756	0	1	0	-	282	277	228	211	41	53	58	30	7.44794	7.47818	7.34453	7.30627	6.44748	6.53585	6.61223	6.4177	2.78337	2.90005	2.4323	2.28403	0.399698	0.529235	0.639542	0.344357
ENSMUSG00000030748	Il4ra	chr7:125552281-125579472	+	5092	2.24538	1.29492e-139	1388.88	2.24538	1.29492e-139	1388.88	0	1	0	-	1344	1348	1172	1043	240	293	232	209	9.86177	9.92104	9.80229	9.71669	8.49216	8.6315	8.54699	8.50983	11.6164	12.3585	10.9486	9.88675	2.04884	2.56206	2.24015	2.10079
ENSMUSG00000068874	Selenbp1	chr3:94933055-94944758	+	2273	2.24325	1.74777e-16	157.575	2.24325	1.74777e-16	157.575	0	1	0	-	54	53	49	40	11	3	6	3	4.83736	4.85062	4.82729	4.76821	4.50302	4.42494	4.46579	4.43639	1.04557	1.08853	1.02546	0.849412	0.210368	0.0587668	0.129787	0.0675533
ENSMUSG00000023047	Amhr2	chr15:102445366-102454630	+	2002	2.24225	3.3913e-16	154.696	2.24225	3.3913e-16	154.696	0	1	0	-	54	40	55	45	2	4	9	7	4.82585	4.74558	4.8575	4.79443	4.40157	4.42329	4.48567	4.46932	1.18711	0.932737	1.30683	1.08494	0.0434262	0.0889623	0.221033	0.178961
ENSMUSG00000000753	Serpinf1	chr11:75409768-75422701	-	2359	2.2337	3.01168e-117	1165.21	2.2337	3.01168e-117	1165.21	0	1	0	-	1867	1923	1824	1365	358	356	300	369	10.3608	10.447	10.4093	10.1573	8.99232	8.99765	8.95308	9.12731	34.8318	38.0552	36.7805	27.9295	6.59692	6.71943	6.25276	8.00614
ENSMUSG00000006457	Actn3	chr19:4861222-4877909	-	2894	2.22796	9.22486e-79	780.35	2.22796	9.22486e-79	780.35	0	1	0	-	463	440	388	349	87	80	73	80	8.23161	8.2381	8.14574	8.07974	7.14736	7.1165	7.12675	7.18933	7.04112	7.0977	6.37755	5.82083	1.30679	1.23084	1.24023	1.41487
ENSMUSG00000098132	Rassf10	chr7:112953961-112957457	+	3496	2.22731	2.23847e-12	116.5	2.22731	2.23847e-12	116.5	0	1	0	-	27	25	18	18	0	0	1	1	3.52337	3.51848	3.45963	3.46334	3.27882	3.27912	3.29295	3.29441	0.339901	0.333835	0.244918	0.248519	0	0	0.0140639	0.0146404
ENSMUSG00000036856	Wnt4	chr4:137277488-137299726	+	4194	2.22396	2.41259e-29	286.175	2.22396	2.41259e-29	286.175	0	1	0	-	1327	1302	1092	1016	236	160	151	259	9.79672	9.83533	9.68237	9.63787	8.40954	8.1874	8.21697	8.57992	13.9252	14.4926	12.3855	11.6929	2.44607	1.69864	1.77022	3.16079
ENSMUSG00000038276	Asic3	chr5:24413450-24417834	+	1942	2.22152	2.1123e-61	606.752	2.22152	2.1123e-61	606.752	0	1	0	-	325	300	288	245	56	64	57	46	7.6879	7.67116	7.65023	7.547	6.69078	6.74664	6.7465	6.68762	7.36535	7.21166	7.05446	6.0894	1.2535	1.46737	1.44313	1.21236
ENSMUSG00000033595	Lgi3	chr14:70530820-70538323	+	3180	2.21324	2.95964e-20	195.288	2.21324	2.95964e-20	195.288	0	1	0	-	70	71	61	62	7	11	11	10	5.32264	5.35256	5.29483	5.31065	4.8486	4.88924	4.90441	4.90055	0.968792	1.0423	0.91248	0.941071	0.0956879	0.15402	0.170076	0.160952
ENSMUSG00000042284	Itga1	chr13:114958078-115101964	-	5984	2.21272	7.54753e-42	411.222	2.21272	7.54753e-42	411.222	-1.40406	1	0	chr13:114996920-114997064	189	184	202	179	27	48	33	32	6.94042	6.96109	7.03364	6.96734	6.11079	6.2731	6.19584	6.20202	1.39005	1.43545	1.60576	1.44384	0.196136	0.357158	0.271144	0.273705
ENSMUSG00000064373	Sepp1	chr15:3268546-3280508	+	2845	2.17888	4.60218e-93	923.37	2.17888	4.60218e-93	923.37	0	1	0	-	1993	1800	1911	1521	316	496	321	348	10.4471	10.4068	10.4777	10.283	8.94046	9.26613	9.02983	9.11619	30.8308	29.5361	31.9521	25.805	4.82826	7.76264	5.54755	6.26068
ENSMUSG00000041132	N4bp2l1	chr5:150571642-150594525	-	1906	2.17879	7.23315e-23	221.407	2.17879	7.23315e-23	221.407	0	1	0	-	110	142	126	90	11	21	30	15	6.14642	6.32482	6.26143	6.09124	5.49143	5.58574	5.69068	5.5624	2.53997	3.47799	3.14462	2.27917	0.250874	0.490576	0.773885	0.402803
ENSMUSG00000006344	Ggt5	chr10:75589380-75616968	+	4137	2.16753	4.35645e-13	123.609	2.16753	4.35645e-13	123.609	0	1	0	-	49	36	35	25	2	7	0	4	4.39841	4.32111	4.31685	4.23973	4.0104	4.062	3.99412	4.04231	0.521279	0.406238	0.402442	0.291684	0.0210151	0.0753395	0	0.0494879
ENSMUSG00000064294	Aox3	chr1:58113129-58200698	+	7033	2.16509	5.69223e-27	262.447	2.16509	5.69223e-27	262.447	0	1	0	-	114	125	109	115	29	11	21	21	6.17712	6.26033	6.19106	6.23357	5.66433	5.50925	5.62505	5.63582	0.713385	0.829722	0.737236	0.789251	0.179243	0.0696406	0.14681	0.152828
ENSMUSG00000000031	H19	chr7:142575528-142578143	-	2372	2.15894	4.14461e-31	303.825	2.15894	4.14461e-31	303.825	0	1	0	-	3372	3363	3277	2965	709	538	412	739	11.2274	11.284	11.2721	11.1978	9.86743	9.6755	9.5646	10.0226	62.5651	66.1874	65.7177	60.3348	12.9932	10.099	8.54006	15.9461
ENSMUSG00000024164	C3	chr17:57203969-57228136	-	5143	2.15596	1.22872e-26	259.105	2.15596	1.22872e-26	259.105	0	1	0	-	10115	10797	9910	8256	1426	2446	1973	1192	12.8188	12.9454	12.8728	12.7147	11.1002	11.5335	11.4402	11.0854	86.5583	98.0053	91.6595	77.4838	12.0528	21.1763	18.8621	11.8627
ENSMUSG00000076275	Mir675	chr7:142577063-142577147	-	84	2.15185	1.04748e-35	349.799	2.15185	1.04748e-35	349.799	0	1	0	-	180	169	179	164	43	23	25	41	6.83987	6.83645	6.8829	6.84086	6.16434	6.01252	6.05858	6.20593	94.3089	93.9227	101.366	94.2372	22.2523	12.1915	14.6332	24.9821
ENSMUSG00000098816	H19_2	chr7:142577848-142577918	+	70	2.14999	4.31923e-34	333.646	2.14999	4.31923e-34	333.646	0	1	0	-	151	144	148	145	39	30	18	25	6.58059	6.58675	6.61173	6.61351	5.98572	5.92034	5.84372	5.91984	94.9376	96.0346	100.574	99.9834	24.2188	19.0824	12.6431	18.2796
ENSMUSG00000024873	Cnih2	chr19:5092870-5098418	-	1237	2.14728	6.21165e-49	482.068	2.14728	6.21165e-49	482.068	0	1	0	-	327	344	257	232	62	64	51	55	7.70037	7.78588	7.57258	7.51532	6.73777	6.75578	6.71477	6.76113	11.6342	12.9823	9.88289	9.05266	2.17875	2.30367	2.02712	2.27571
ENSMUSG00000074604	Mgst2	chr3:51660359-51682675	+	3659	2.13333	1.07688e-31	309.678	2.13333	1.07688e-31	309.678	0	1	0	-	139	139	129	120	27	21	31	21	6.43021	6.46425	6.42788	6.39956	5.79146	5.74435	5.85746	5.78089	1.67191	1.77344	1.67706	1.58298	0.320765	0.255545	0.41656	0.293752
ENSMUSG00000008153	Clstn3	chr6:124430758-124464794	-	4968	2.12936	5.7922e-21	202.372	2.12936	5.7922e-21	202.372	0	1	0	-	77	92	76	70	9	16	15	13	5.58118	5.69112	5.6066	5.58026	5.08559	5.15349	5.16304	5.15099	0.682132	0.864509	0.7277	0.680102	0.0787493	0.1434	0.148453	0.133933
ENSMUSG00000023987	Pgc	chr17:47726841-47734482	+	1388	2.12698	4.54603e-24	233.424	2.12698	4.54603e-24	233.424	0	1	0	-	144	134	88	91	18	21	20	22	6.28786	6.27889	6.05904	6.08736	5.55118	5.58035	5.59535	5.62461	4.56596	4.50691	3.01588	3.16453	0.563727	0.673659	0.708466	0.811256
ENSMUSG00000003273	Car11	chr7:45699842-45704682	+	1926	2.12535	2.51588e-20	195.993	2.12535	2.51588e-20	195.993	0	1	0	-	84	71	70	69	8	17	13	11	5.5434	5.49351	5.49305	5.49677	4.99975	5.08626	5.06658	5.0534	1.91948	1.72094	1.72887	1.72922	0.180559	0.393009	0.331868	0.292322
ENSMUSG00000003420	Fcgrt	chr7:45092992-45103822	-	1738	2.1186	5.89997e-120	1192.29	2.1186	5.89997e-120	1192.29	0	1	0	-	1042	1082	932	817	221	234	207	178	9.51211	9.6021	9.47714	9.37989	8.30503	8.3499	8.3393	8.27447	26.3862	29.063	25.5086	22.6898	5.5275	5.99482	5.85597	5.24197
ENSMUSG00000029455	Aldh2	chr5:121566026-121593824	-	4704	2.10735	4.80064e-113	1123.19	2.10735	4.80064e-113	1123.19	0	1	0	-	5129	4949	4141	4107	1197	907	818	1066	11.8383	11.8625	11.7006	11.7165	10.538	10.3335	10.333	10.5719	47.9871	49.1149	41.8753	42.142	11.0615	8.58519	8.54997	11.5988
ENSMUSG00000020186	Csrp2	chr10:110920176-110939599	+	973	2.1065	1.54019e-142	1418.12	2.1065	1.54019e-142	1418.12	-1.14762	0.888628	0.512802	chr10:110920176-110920256	3254	2989	2576	2332	653	609	548	632	11.1554	11.1309	10.9998	10.9276	9.7593	9.71729	9.71555	9.85552	147.185	143.409	125.937	115.684	29.1734	27.8686	27.6915	33.2452
ENSMUSG00000019768	Esr1	chr10:4611592-5005614	+	13661	2.09361	1.1415e-11	109.425	2.09361	1.1415e-11	109.425	0	1	0	-	27	29	22	26	2	4	1	1	3.81956	3.84803	3.7918	3.83101	3.59614	3.61718	3.59015	3.59185	0.0869843	0.0991012	0.0766056	0.0918647	0.00636405	0.0130373	0.00359912	0.00374664
ENSMUSG00000004655	Aqp1	chr6:55336431-55348555	+	2627	2.08649	6.24772e-33	322.043	2.08649	6.24772e-33	322.043	0	1	0	-	194	162	128	148	30	34	30	32	6.81602	6.73607	6.60069	6.70233	5.9942	6.0295	6.02889	6.05949	3.25013	2.87884	2.31777	2.71931	0.496418	0.576274	0.561487	0.623469
ENSMUSG00000083282	Ctsf	chr19:4855128-4860912	+	1975	2.08349	9.38281e-75	740.277	2.08349	9.38281e-75	740.277	0	1	0	-	569	563	458	475	108	100	117	123	8.5884	8.63013	8.46664	8.51728	7.45591	7.42557	7.56096	7.61344	12.6796	13.3077	11.0311	11.6087	2.37707	2.25446	2.91271	3.18759
ENSMUSG00000049001	Ndnf	chr6:65671589-65706930	+	4718	2.08309	1.24628e-22	219.044	2.08309	1.24628e-22	219.044	0	1	0	-	103	87	84	76	14	19	17	14	5.84758	5.79185	5.78133	5.74542	5.26181	5.30939	5.31205	5.29121	0.960813	0.860844	0.846919	0.777523	0.12899	0.179311	0.177161	0.151878
ENSMUSG00000087187	Gm13431	chr2:36216776-36222934	+	823	2.07053	3.2083e-27	264.937	2.07053	3.2083e-27	264.937	0	1	0	-	203	215	124	157	40	42	21	34	6.92524	7.00462	6.66065	6.81828	6.14726	6.16642	6.02745	6.15406	10.8556	12.1956	7.16708	9.20784	2.11274	2.27227	1.25458	2.11448
ENSMUSG00000038527	C1rl	chr6:124493112-124510643	+	3010	2.06869	4.48224e-51	503.485	2.06869	4.48224e-51	503.485	0	1	0	-	285	315	288	262	70	82	48	48	7.609	7.72954	7.67109	7.61778	6.80231	6.87647	6.7106	6.72852	4.16714	4.88548	4.55142	4.20139	1.01092	1.21299	0.784067	0.816205
ENSMUSG00000040026	Saa3	chr7:46711997-46715676	-	531	2.061	7.9391e-19	181.002	2.061	7.9391e-19	181.002	-1.05228	2.88356e-07	65.4007	chr7:46715648-46715676	46004	45713	41782	32540	5585	11305	7681	4993	14.9747	15.0297	14.9524	14.7257	13.0947	13.6741	13.4339	13.1286	3812.95	4018.91	3742.96	2957.88	457.209	947.952	711.216	481.273
ENSMUSG00000036446	Lum	chr10:97565500-97572703	+	2075	2.05749	6.61532e-14	131.794	2.05749	6.61532e-14	131.794	0	1	0	-	62	52	47	34	6	5	4	12	4.91011	4.8654	4.83478	4.74299	4.47764	4.46884	4.46736	4.55766	1.31502	1.1699	1.07746	0.790895	0.125695	0.107291	0.0947808	0.295997
ENSMUSG00000026712	Mrc1	chr2:14229413-14332057	+	5947	2.05425	5.69725e-17	162.443	2.05425	5.69725e-17	162.443	0	1	0	-	56	56	69	65	7	11	12	11	5.18509	5.20614	5.29511	5.27947	4.79974	4.84019	4.86518	4.86161	0.414429	0.439596	0.551914	0.527562	0.0511665	0.0823578	0.0992114	0.0946715
ENSMUSG00000031610	Scrg1	chr8:57455922-57477585	+	700	2.05411	1.55708e-10	98.0769	2.05411	1.55708e-10	98.0769	0	1	0	-	25	14	17	16	0	0	0	1	3.23181	3.14559	3.17506	3.1692	3.00439	3.00464	3.00665	3.01923	1.57182	0.93367	1.15524	1.10326	0	0	0	0.0731184
ENSMUSG00000057969	Sema3b	chr9:107597673-107609229	-	4250	2.04801	2.46402e-67	666.084	2.04801	2.46402e-67	666.084	0	1	0	-	366	362	339	344	85	75	67	87	7.96676	8.00463	7.96341	7.99387	7.06252	7.01438	7.0155	7.15361	3.79011	3.97633	3.7943	3.90685	0.869393	0.785747	0.775112	1.04774
ENSMUSG00000022199	Slc22a17	chr14:54906726-54913132	-	2294	2.04365	1.59094e-92	917.983	2.04365	1.59094e-92	917.983	0	1	0	-	649	657	548	541	141	141	120	141	8.80852	8.87117	8.72556	8.73521	7.71685	7.7245	7.69648	7.81159	12.4512	13.3701	11.3634	11.3831	2.67185	2.73675	2.57197	3.14594
ENSMUSG00000034245	Hdac11	chr6:91156664-91174692	+	3849	2.03693	6.56992e-34	331.824	2.03693	6.56992e-34	331.824	0	1	0	-	190	163	141	150	29	39	32	35	6.83366	6.77167	6.69003	6.7425	6.02029	6.10117	6.07965	6.11856	2.17253	1.97698	1.74258	1.88105	0.327519	0.451156	0.408771	0.46542
ENSMUSG00000063558	Aox1	chr1:58029930-58106413	+	8690	2.03669	6.58438e-36	351.815	2.03669	6.58438e-36	351.815	0	1	0	-	184	167	159	157	38	29	33	41	6.84846	6.82313	6.80037	6.80726	6.12612	6.06096	6.12487	6.20369	0.931875	0.897139	0.870358	0.872042	0.190086	0.14859	0.186712	0.241484
ENSMUSG00000074738	B930041F14Rik	chr4:155694341-155696481	+	2140	2.03306	7.23277e-43	421.407	2.03306	7.23277e-43	421.407	0	1	0	-	294	281	221	228	50	68	43	61	7.5427	7.5525	7.3871	7.42617	6.58446	6.70365	6.58019	6.72443	6.04635	6.12993	4.91246	5.14255	1.01565	1.41483	0.987946	1.45895
ENSMUSG00000091921	B930041F14Rik	chr4:155694341-155696481	+	2138	2.03306	7.23277e-43	421.407	2.03306	7.23277e-43	421.407	0	1	0	-	294	281	221	228	50	68	43	61	7.5427	7.5525	7.3871	7.42617	6.58446	6.70365	6.58019	6.72443	6.052	6.13567	4.91706	5.14736	1.0166	1.41616	0.98887	1.46032
ENSMUSG00000004035	Gstm7	chr3:107926333-107931817	-	1601	2.01411	5.10806e-12	112.917	2.01411	5.10806e-12	112.917	0	1	0	-	49	34	41	23	5	4	3	6	4.46361	4.37103	4.42832	4.288	4.10732	4.0982	4.09464	4.13122	1.34699	0.991404	1.21818	0.693417	0.135758	0.111245	0.0921315	0.191816
ENSMUSG00000034771	Tle2	chr10:81574560-81590845	+	6221	2.01393	1.72751e-39	387.626	2.01393	1.72751e-39	387.626	-1.28118	1	0	chr10:81577632-81577688	296	342	312	266	87	51	49	79	7.68415	7.84069	7.77939	7.67612	6.94587	6.73931	6.7676	6.97986	2.09407	2.56643	2.38569	2.06386	0.607918	0.365023	0.38727	0.649967
ENSMUSG00000057751	Megf6	chr4:154170729-154275713	+	7877	2.00915	5.64229e-47	462.485	2.00915	5.64229e-47	462.485	0	1	0	-	5577	5511	4580	4784	917	1448	1156	1045	11.9773	12.0252	11.8565	11.9233	10.4117	10.7758	10.6763	10.6312	31.1601	32.6612	27.6583	29.3149	5.06051	8.18499	7.21565	6.79016
ENSMUSG00000019890	Nts	chr10:102481759-102490418	-	1176	2.00666	4.23698e-19	183.729	2.00666	4.23698e-19	183.729	0	1	0	-	79	86	67	71	17	13	10	17	5.57657	5.64189	5.53562	5.57049	5.14612	5.11196	5.099	5.17691	2.95651	3.41393	2.71012	2.91413	0.628388	0.492205	0.418091	0.739888
ENSMUSG00000031785	Gpr56	chr8:94977108-95014208	+	3864	1.99469	1.64482e-59	587.839	1.99469	1.64482e-59	587.839	0	1	0	-	398	393	321	359	85	81	75	97	8.07096	8.10818	7.95862	8.06551	7.1037	7.08879	7.10489	7.24859	4.53321	4.74809	3.95174	4.48451	0.956242	0.933379	0.954339	1.28487
ENSMUSG00000025207	Sema4g	chr19:44989100-45003397	+	4872	1.99178	1.29823e-37	368.866	1.99178	1.29823e-37	368.866	-1.1162	1	0	chr19:44998232-44998456	294	254	240	197	74	41	50	53	7.51489	7.44952	7.41807	7.29589	6.70473	6.49878	6.60196	6.6411	2.65583	2.43383	2.34328	1.95172	0.660253	0.374703	0.504593	0.556792
ENSMUSG00000033022	Cdo1	chr18:46713204-46728342	-	1530	1.98501	9.35332e-46	450.29	1.98501	9.35332e-46	450.29	0	1	0	-	230	243	263	216	59	58	50	50	7.32181	7.40236	7.47013	7.34493	6.60075	6.59985	6.58815	6.60591	6.61601	7.41443	8.17683	6.81428	1.67628	1.6879	1.60678	1.67264
ENSMUSG00000004187	Kifc2	chr15:76660640-76668196	+	3143	1.9839	1.65657e-31	307.808	1.9839	1.65657e-31	307.808	0	1	0	-	186	179	163	133	30	47	37	30	6.85085	6.86353	6.8115	6.70065	6.06071	6.19098	6.15259	6.10937	2.60452	2.65872	2.46697	2.04251	0.414919	0.66583	0.57881	0.488542
ENSMUSG00000048772	Tmem53	chr4:117251950-117268582	+	1713	1.97755	2.52082e-31	305.985	1.97755	2.52082e-31	305.985	0	1	0	-	168	176	166	138	47	29	28	38	6.77086	6.8378	6.80853	6.70809	6.17171	6.04208	6.06417	6.1608	4.3163	4.79643	4.60968	3.88848	1.19269	0.753791	0.803672	1.13541
ENSMUSG00000024663	Rab3il1	chr19:10001668-10038380	+	4543	1.96957	2.492e-26	256.035	1.96957	2.492e-26	256.035	0	1	0	-	181	156	143	122	29	28	26	45	6.74263	6.68453	6.63907	6.5591	5.96009	5.95579	5.96821	6.13709	1.75346	1.60304	1.49732	1.29621	0.277486	0.274426	0.28139	0.506984
ENSMUSG00000085828	Gm15612	chr6:88842853-88847274	+	3118	1.9604	2.84649e-57	565.457	1.9604	2.84649e-57	565.457	0	1	0	-	391	376	331	285	85	86	79	76	8.01639	8.03207	7.94191	7.84545	7.0617	7.07339	7.08549	7.08966	5.519	5.62957	5.04978	4.41191	1.18503	1.2281	1.24575	1.24756
ENSMUSG00000022218	Tgm1	chr14:55700008-55713492	-	3006	1.95516	1.59549e-28	277.971	1.95516	1.59549e-28	277.971	0	1	0	-	176	156	143	138	24	48	36	27	6.74992	6.71003	6.66466	6.65736	5.94668	6.13252	6.07868	6.01707	2.57681	2.4227	2.26291	2.21589	0.347063	0.710988	0.588833	0.459726
ENSMUSG00000004558	Ndrg2	chr14:51905270-51913488	-	2157	1.94905	7.9482e-144	1431	1.94905	7.9482e-144	1431	0	1	0	-	1229	1234	1141	1032	312	301	295	237	9.79607	9.85535	9.79541	9.72547	8.69232	8.677	8.73457	8.61825	25.0762	26.7072	25.1626	23.0934	6.28768	6.21336	6.72435	5.62371
ENSMUSG00000042675	Ypel3	chr7:126776954-126780514	+	1848	1.94628	3.24056e-74	734.894	1.94628	3.24056e-74	734.894	0	1	0	-	677	725	633	604	157	141	153	185	8.92203	9.03467	8.92722	8.90747	7.86605	7.81414	7.92109	8.0644	16.123	18.3147	16.2938	15.7758	3.69304	3.39725	4.07069	5.12383
ENSMUSG00000087293	Gm14341	chr2:180954463-180966812	+	667	1.94364	1.00094e-10	99.9959	1.94364	1.00094e-10	99.9959	0	1	0	-	26	35	23	34	5	3	4	2	4.03021	4.1146	4.01942	4.11617	3.84489	3.82555	3.84242	3.82267	1.71556	2.44966	1.6403	2.46043	0.325859	0.200265	0.294858	0.153472
ENSMUSG00000024500	Ppp2r2b	chr18:42637431-43059471	-	3985	1.93478	1.12761e-128	1279.48	1.93478	1.12761e-128	1279.48	0	1	0	-	1400	1186	1187	1075	309	336	258	301	9.94316	9.84423	9.85783	9.78892	8.71692	8.78356	8.67581	8.81038	15.4618	13.8938	14.1691	13.0208	3.37067	3.75423	3.18324	3.86601
ENSMUSG00000038677	Scube3	chr17:28142315-28174852	+	8660	1.93089	2.59295e-136	1355.86	1.93089	2.59295e-136	1355.86	0	1	0	-	1085	1113	973	943	265	273	236	253	9.6173	9.69571	9.58498	9.5786	8.50694	8.53544	8.50888	8.58459	5.51406	5.99985	5.3446	5.25595	1.33019	1.40364	1.3399	1.4953
ENSMUSG00000023484	Prph	chr15:99055173-99058978	+	1865	1.929	1.38076e-66	658.599	1.929	1.38076e-66	658.599	0	1	0	-	1034	968	817	831	188	281	246	175	9.49571	9.48986	9.34892	9.38591	8.19902	8.46319	8.44359	8.25624	24.4006	24.2304	20.8384	21.507	4.38193	6.70869	6.48537	4.80268
ENSMUSG00000085550	Gm15658	chr16:33770429-33787112	-	574	1.92641	2.22437e-23	226.528	1.92641	2.22437e-23	226.528	0	1	0	-	122	94	128	111	24	22	24	29	6.24916	6.14221	6.31622	6.24883	5.66318	5.64949	5.69238	5.74827	9.35422	7.64503	10.6076	9.33402	1.81755	1.70656	2.05579	2.58589
ENSMUSG00000020684	Rasl10b	chr11:83409136-83421039	+	4010	1.9246	6.17782e-34	332.092	1.9246	6.17782e-34	332.092	0	1	0	-	219	198	188	160	59	49	31	39	7.10486	7.07556	7.04967	6.95981	6.41386	6.35318	6.25454	6.33368	2.40358	2.30507	2.23015	1.9259	0.639578	0.544079	0.380098	0.497789
ENSMUSG00000012428	Steap4	chr5:7960471-7982213	+	3140	1.92229	1.20426e-41	409.193	1.92229	1.20426e-41	409.193	0	1	0	-	2899	3087	3265	2508	676	928	645	563	11.0856	11.2048	11.2734	11.041	9.84216	10.0976	9.89375	9.82547	40.6329	45.8955	49.4623	38.5528	9.35843	13.1592	10.0997	9.17706
ENSMUSG00000054793	Cadm4	chr7:24482022-24504539	+	2161	1.91975	1.03382e-85	849.856	1.91975	1.03382e-85	849.856	0	1	0	-	692	641	642	594	137	197	161	143	8.93038	8.91537	8.92873	8.88218	7.77976	7.99832	7.93975	7.89736	14.0932	13.8473	14.1319	13.2675	2.75583	4.05902	3.66311	3.38693
ENSMUSG00000009281	Rarres2	chr6:48569697-48572670	-	708	1.91592	3.4253e-18	174.653	1.91592	3.4253e-18	174.653	0	1	0	-	92	85	64	74	20	20	12	13	5.70706	5.69628	5.57685	5.64901	5.23345	5.23614	5.18076	5.19847	5.71892	5.60465	4.29999	5.04494	1.22796	1.25779	0.833348	0.939798
ENSMUSG00000055172	C1ra	chr6:124512631-124523440	+	2751	1.91585	4.33328e-79	783.632	1.91585	4.33328e-79	783.632	0	1	0	-	2351	2241	2099	1951	501	732	517	406	10.7384	10.75	10.7005	10.654	9.43456	9.73146	9.54266	9.4001	37.6116	38.029	36.2946	34.2314	7.9165	11.8476	9.24013	7.55371
ENSMUSG00000035493	Tgfbi	chr13:56609602-56639339	+	2678	1.91535	2.2069e-21	206.562	1.91535	2.2069e-21	206.562	0	1	0	-	1444	1346	1292	1039	331	199	229	342	9.96739	9.95741	9.93185	9.75215	8.75362	8.43763	8.588	8.89171	23.731	23.4638	22.9495	18.7268	5.37283	3.30866	4.20439	6.53642
ENSMUSG00000032174	Icam5	chr9:21032037-21039036	+	2982	1.91125	7.83103e-22	211.062	1.91125	7.83103e-22	211.062	0	1	0	-	122	112	92	108	25	31	27	12	6.19873	6.1832	6.08765	6.18326	5.62113	5.67312	5.66797	5.53723	1.80058	1.75337	1.46758	1.74813	0.364434	0.462876	0.445179	0.205967
ENSMUSG00000056492	Gpr116	chr17:43389465-43459557	+	8535	1.90886	6.36569e-14	131.962	1.90886	6.36569e-14	131.962	0	1	0	-	55	47	60	50	13	14	5	7	5.02584	4.99114	5.08419	5.0248	4.7069	4.71803	4.64165	4.66796	0.283608	0.257074	0.334402	0.282764	0.0662103	0.0730356	0.0288035	0.0419777
ENSMUSG00000033491	Prss35	chr9:86743632-86758272	+	3227	1.90769	9.47593e-16	150.234	1.90769	9.47593e-16	150.234	0	1	0	-	84	74	80	63	9	18	24	8	5.60397	5.57239	5.61359	5.51935	5.07181	5.15726	5.23265	5.08429	1.14562	1.07052	1.17927	0.942322	0.121235	0.248361	0.365671	0.126887
ENSMUSG00000085180	AI838599	chr4:3242054-3258092	+	4243	1.90735	3.306e-27	264.807	1.90735	3.306e-27	264.807	0	1	0	-	152	170	174	149	50	36	21	41	6.71627	6.82248	6.84623	6.76236	6.20032	6.1047	6.01125	6.19265	1.57663	1.87042	1.95073	1.69501	0.512251	0.377781	0.243346	0.494579
ENSMUSG00000056185	Snx32	chr19:5495277-5510489	-	1650	1.88645	6.79148e-55	541.68	1.88645	6.79148e-55	541.68	0	1	0	-	363	339	311	292	84	97	83	62	7.92905	7.92145	7.86517	7.83532	7.02826	7.10156	7.07958	6.97509	9.68238	9.59133	8.96596	8.54194	2.213	2.61757	2.47328	1.92324
ENSMUSG00000029167	Ppargc1a	chr5:51454248-51567725	-	6641	1.87472	1.41018e-16	158.507	1.87472	1.41018e-16	158.507	0	1	0	-	66	86	86	67	15	19	20	10	5.53378	5.67476	5.68099	5.57877	5.16318	5.20121	5.23131	5.14127	0.437391	0.604544	0.616007	0.486966	0.0981847	0.127389	0.148073	0.077071
ENSMUSG00000079484	Phyhd1	chr2:30266202-30282149	+	2657	1.86803	3.45826e-32	314.611	1.86803	3.45826e-32	314.611	0	1	0	-	218	181	160	156	42	52	41	38	7.05492	6.96878	6.89802	6.897	6.2537	6.3274	6.28697	6.27922	3.61097	3.18017	2.8645	2.83394	0.687138	0.871409	0.758701	0.732009
ENSMUSG00000046402	Rbp1	chr9:98422960-98446551	+	2628	1.86222	1.00303e-46	459.987	1.86222	1.00303e-46	459.987	0	1	0	-	766	595	649	510	200	145	115	173	9.00642	8.83701	8.92442	8.73819	7.9837	7.80186	7.73734	7.99518	12.8281	10.5695	11.7473	9.36704	3.30819	2.4567	2.15155	3.36934
ENSMUSG00000060882	Kcnd2	chr6:21215502-21729805	+	5152	1.85819	7.92053e-09	81.0125	1.85819	7.92053e-09	81.0125	0	1	0	-	17	21	15	14	1	2	0	0	3.12053	3.16404	3.11233	3.106	2.97126	2.98192	2.96309	2.96395	0.145222	0.190286	0.138496	0.131163	0.00843743	0.0172848	0	0
ENSMUSG00000019647	Sema6a	chr18:47235597-47368870	-	8778	1.85754	4.31841e-10	93.6468	1.85754	4.31841e-10	93.6468	0	1	0	-	33	26	30	27	7	2	4	3	4.08937	4.04686	4.08266	4.06316	3.87004	3.821	3.84802	3.83974	0.165454	0.138274	0.162572	0.148466	0.0346648	0.0101448	0.0224049	0.0174924
ENSMUSG00000034949	Zfr2	chr10:81233154-81252123	+	7483	1.8556	7.25882e-25	241.391	1.8556	7.25882e-25	241.391	0	1	0	-	145	127	123	112	42	28	23	27	6.47197	6.42819	6.41753	6.37825	5.92867	5.8261	5.81108	5.85838	0.852809	0.792303	0.781898	0.722437	0.243983	0.166607	0.151123	0.184677
ENSMUSG00000028860	Sytl1	chr4:133253089-133263113	-	2518	1.85406	2.22628e-31	306.524	1.85406	2.22628e-31	306.524	0	1	0	-	230	214	156	173	50	57	40	42	7.16114	7.15128	6.95157	7.03283	6.3793	6.43042	6.35034	6.38154	4.02005	3.96754	2.94706	3.31626	0.863178	1.00793	0.781057	0.853725
ENSMUSG00000028766	Alpl	chr4:137741732-137796384	-	4033	1.84686	3.12824e-15	145.047	1.84686	3.12824e-15	145.047	0	1	0	-	1029	1031	901	737	152	295	214	123	9.46129	9.51822	9.40664	9.24751	8.03539	8.45787	8.31144	8.01598	11.2291	11.9342	10.6272	8.82058	1.63833	3.2569	2.60894	1.561
ENSMUSG00000028150	Rorc	chr3:94372793-94398276	+	3559	1.84482	5.50383e-23	222.593	1.84482	5.50383e-23	222.593	0	1	0	-	128	116	119	92	27	30	22	28	6.29469	6.27181	6.29337	6.16921	5.70894	5.7365	5.69572	5.76053	1.58286	1.52157	1.59052	1.24772	0.329778	0.375322	0.30393	0.402675
ENSMUSG00000027848	Olfml3	chr3:103722221-103738001	-	4371	1.84429	1.01464e-158	1579.94	1.84429	1.01464e-158	1579.94	0	1	0	-	2028	1873	1851	1617	530	548	420	468	10.5327	10.5141	10.516	10.4115	9.39588	9.43065	9.31129	9.42241	20.4196	20.0042	20.144	17.8561	5.27086	5.58226	4.7244	5.48012
ENSMUSG00000075254	Heg1	chr16:33684465-33771576	+	12632	1.84111	1.75189e-213	2127.56	1.84111	1.75189e-213	2127.56	-1.44002	4.95985e-39	383.045	chr16:33706916-33707208	4429	4271	4094	3662	1081	1254	1071	1009	11.6881	11.7114	11.6837	11.5992	10.452	10.5801	10.5352	10.5224	15.431	15.7841	15.4169	13.9928	3.71997	4.42014	4.16865	4.08831
ENSMUSG00000019936	Epyc	chr10:97644067-97682454	+	2561	1.83951	1.19351e-08	79.2317	1.83951	1.19351e-08	79.2317	0	1	0	-	20	14	11	18	0	1	1	0	3.04512	3.00029	2.97346	3.04221	2.85985	2.87051	2.87314	2.86267	0.3437	0.255201	0.204317	0.339251	0	0.017386	0.0191986	0
ENSMUSG00000033152	Podxl2	chr6:88842557-88875044	-	3948	1.83584	1.15616e-97	969.37	1.83584	1.15616e-97	969.37	0	1	0	-	904	860	771	719	212	254	212	186	9.32792	9.33662	9.25125	9.21099	8.22032	8.3451	8.29551	8.24177	10.0775	10.1691	9.28962	8.79042	2.33424	2.86462	2.6402	2.41135
ENSMUSG00000052688	5430435G22Rik	chr1:131688694-131713542	+	2727	1.83368	2.46402e-67	666.084	1.83368	2.46402e-67	666.084	0	1	0	-	485	444	437	401	115	118	102	128	8.39525	8.37111	8.3693	8.31879	7.43014	7.45052	7.4322	7.57761	7.82738	7.60083	7.62284	7.09769	1.83315	1.92667	1.83905	2.40242
ENSMUSG00000033066	Gas7	chr11:67455436-67688990	+	11342	1.82012	2.47085e-16	156.072	1.82012	2.47085e-16	156.072	0	1	0	-	101	84	70	78	18	27	9	20	5.83047	5.76827	5.69212	5.75067	5.29408	5.37326	5.229	5.34584	0.391914	0.345743	0.293582	0.331942	0.0689873	0.105995	0.039015	0.0902537
ENSMUSG00000032289	Thsd4	chr9:59966930-60522046	-	13986	1.81873	2.8537e-36	355.446	1.81873	2.8537e-36	355.446	-1.23012	5.248e-25	242.8	chr9:60482424-60482496	2238	2263	2209	1948	476	720	588	436	10.6991	10.7672	10.7574	10.6606	9.40897	9.72829	9.65018	9.46136	7.04249	7.5536	7.51316	6.72285	1.47945	2.29218	2.0671	1.59558
ENSMUSG00000098470	C1rb	chr6:124570293-124581171	+	2429	1.81057	2.02677e-08	76.9319	1.81057	2.02677e-08	76.9319	0	1	0	-	23	17	14	13	0	3	0	0	3.16292	3.12068	3.09497	3.08839	2.95286	2.98406	2.95502	2.95587	0.416735	0.326727	0.274171	0.258329	0	0.0549926	0	0
ENSMUSG00000041556	Fbxo2	chr4:148160620-148166424	+	1288	1.80136	9.27634e-62	610.326	1.80136	9.27634e-62	610.326	0	1	0	-	580	543	421	504	139	157	123	130	8.64925	8.64351	8.44367	8.61237	7.64482	7.72124	7.64481	7.70059	19.8185	19.681	15.5484	18.8874	4.69121	5.42743	4.69535	5.16597
ENSMUSG00000029419	Gm996	chr2:25575415-25580099	-	4684	1.80131	1.55946e-25	248.07	1.80131	1.55946e-25	248.07	0	1	0	-	157	182	147	132	45	51	32	27	6.71919	6.84974	6.72262	6.67219	6.15126	6.19717	6.0914	6.06258	1.47517	1.81392	1.49287	1.36024	0.41762	0.484801	0.335901	0.295034
ENSMUSG00000027004	Frzb	chr2:80411969-80447625	-	3237	1.80108	1.33303e-10	98.7516	1.80108	1.33303e-10	98.7516	0	1	0	-	32	33	45	39	5	6	9	6	4.44349	4.46562	4.55978	4.52219	4.21135	4.22235	4.26284	4.23553	0.435078	0.475921	0.661287	0.58154	0.0671449	0.0825313	0.136703	0.0948709
ENSMUSG00000097872	Gm26702	chr2:25575430-25580099	+	4570	1.79401	3.14853e-25	245.019	1.79401	3.14853e-25	245.019	-1.27576	0.251277	5.99846	chr2:25579296-25580100	157	181	147	130	45	51	32	27	6.71599	6.84288	6.7194	6.66001	6.14813	6.19404	6.08826	6.05943	1.51197	1.84895	1.53011	1.37305	0.428038	0.496894	0.34428	0.302393
ENSMUSG00000022037	Clu	chr14:65968482-65981548	+	3438	1.78771	1.31013e-84	838.827	1.78771	1.31013e-84	838.827	0	1	0	-	5479	5654	4471	4247	1217	1659	1342	1213	11.9878	12.0782	11.8618	11.8358	10.6658	10.9248	10.8341	10.7878	70.1383	76.7738	61.8613	59.6258	15.3876	21.4858	19.1922	18.0584
ENSMUSG00000027386	Fbln7	chr2:128862980-128897034	+	3228	1.78418	3.06038e-08	75.1422	1.78418	3.06038e-08	75.1422	0	1	0	-	21	14	15	16	2	0	1	1	3.15928	3.10628	3.11724	3.12972	2.98664	2.96637	2.97953	2.98076	0.286316	0.202469	0.221044	0.239246	0.0269329	0	0.0152316	0.0158559
ENSMUSG00000043664	Tmem221	chr8:71554302-71558871	-	1539	1.7839	1.29594e-17	168.874	1.7839	1.29594e-17	168.874	0	1	0	-	102	100	83	67	21	23	18	21	5.91157	5.93039	5.84544	5.76043	5.39839	5.41821	5.39634	5.43399	2.9169	3.03336	2.56543	2.10133	0.593153	0.665425	0.575059	0.698402
ENSMUSG00000037166	Ppp1r14a	chr7:29289319-29293390	+	531	1.78365	6.68203e-10	91.7509	1.78365	6.68203e-10	91.7509	0	1	0	-	41	35	32	25	8	4	3	7	4.35045	4.32157	4.30142	4.24885	4.08187	4.04361	4.03989	4.0869	3.3982	3.07707	2.86666	2.2725	0.65491	0.33541	0.277783	0.674727
ENSMUSG00000027188	Pamr1	chr2:102550011-102643041	+	6046	1.78262	2.41204e-10	96.1762	1.78262	2.41204e-10	96.1762	0	1	0	-	36	46	33	39	5	3	10	9	4.51525	4.60452	4.51072	4.56393	4.25286	4.23368	4.31473	4.30953	0.262056	0.355184	0.259637	0.311354	0.0359491	0.0220934	0.0813224	0.0761902
ENSMUSG00000023918	Gpr115	chr17:42656890-42692284	-	3060	1.77416	1.53015e-10	98.1527	1.77416	1.53015e-10	98.1527	0	1	0	-	47	32	48	31	6	9	9	5	4.62473	4.53067	4.65415	4.53187	4.29412	4.32453	4.33598	4.29779	0.675983	0.488193	0.746174	0.488988	0.0852346	0.130958	0.14461	0.0836321
ENSMUSG00000059493	Nhs	chrX:161833295-162159730	-	8805	1.773	3.68676e-33	324.334	1.773	3.68676e-33	324.334	0	1	0	-	202	206	236	184	61	66	45	47	7.15589	7.20856	7.31315	7.15755	6.53805	6.57413	6.47656	6.50798	1.00967	1.0922	1.27498	1.00866	0.301153	0.333753	0.251282	0.273208
ENSMUSG00000028444	Cntfr	chr4:41657497-41697089	-	2782	1.77111	4.77084e-53	523.214	1.77111	4.77084e-53	523.214	0	1	0	-	405	417	370	335	110	91	105	109	8.1552	8.22632	8.14109	8.08181	7.30772	7.22341	7.34624	7.38974	6.40704	6.99749	6.32652	5.81227	1.71879	1.45645	1.85571	2.00537
ENSMUSG00000008540	Mgst1	chr6:138140315-138156755	+	2013	1.76961	4.06052e-132	1313.91	1.76961	4.06052e-132	1313.91	0	1	0	-	4625	4126	4023	3558	1186	1389	989	1025	11.7351	11.6823	11.6713	11.5762	10.5313	10.6696	10.4787	10.5412	101.118	95.6861	95.0663	85.3139	25.611	30.7234	24.1563	26.0618
ENSMUSG00000023070	Rgn	chrX:20549786-20562089	+	1607	1.76481	3.89457e-08	74.0954	1.76481	3.89457e-08	74.0954	0	1	0	-	21	15	19	21	5	0	0	1	3.36961	3.32583	3.36399	3.38573	3.22653	3.17622	3.17847	3.19109	0.575126	0.435751	0.562417	0.630756	0.135251	0	0	0.0318499
ENSMUSG00000047363	Cstad	chr2:30595039-30608943	+	1229	1.7613	1.85032e-08	77.3275	1.7613	1.85032e-08	77.3275	0	1	0	-	20	20	24	21	3	4	2	1	3.56501	3.57458	3.61147	3.58975	3.41066	3.42136	3.40528	3.39568	0.716206	0.759699	0.928923	0.824755	0.10611	0.144917	0.0800122	0.0416459
ENSMUSG00000028989	Angptl7	chr4:148495182-148500460	-	2157	1.76125	3.49321e-125	1244.57	1.76125	3.49321e-125	1244.57	0	1	0	-	4320	4049	3747	3554	1057	1285	947	1122	11.65	11.6455	11.5837	11.5563	10.4169	10.5829	10.4209	10.5904	88.1441	87.6316	82.6331	79.5289	21.3015	26.5255	21.5863	26.6236
ENSMUSG00000036570	Fxyd1	chr7:31051680-31055656	-	709	1.75902	5.27749e-08	72.7757	1.75902	5.27749e-08	72.7757	0	1	0	-	22	20	12	9	0	0	2	0	3.04788	3.04073	2.97174	2.94555	2.85228	2.85249	2.87582	2.85491	1.36564	1.31688	0.805111	0.612709	0	0	0.138695	0
ENSMUSG00000041559	Fmod	chr1:134037253-134048277	+	3306	1.74636	1.94021e-74	737.122	1.74636	1.94021e-74	737.122	0	1	0	-	2218	2270	2199	1851	654	644	448	656	10.7048	10.7842	10.7671	10.6268	9.66196	9.66019	9.46899	9.78789	29.5269	32.0543	31.6405	27.0247	8.59926	8.67348	6.66275	10.1561
ENSMUSG00000036655	Colec11	chr12:28594172-28623290	-	1383	1.74601	1.02719e-08	79.8835	1.74601	1.02719e-08	79.8835	0	1	0	-	29	25	27	24	3	3	8	1	3.94169	3.92148	3.94095	3.92039	3.71404	3.71474	3.77352	3.7	0.922859	0.843881	0.928671	0.83762	0.0942942	0.0965849	0.284411	0.0370086
ENSMUSG00000025911	Adhfe1	chr1:9547947-9577970	+	3326	1.74262	8.24411e-11	100.839	1.74262	8.24411e-11	100.839	0	1	0	-	53	47	42	33	9	13	4	9	4.8064	4.78459	4.75269	4.69004	4.46491	4.50399	4.42558	4.48355	0.701315	0.659688	0.600686	0.478905	0.117627	0.174033	0.0591311	0.138498
ENSMUSG00000021974	Fgf9	chr14:58070546-58112337	+	4266	1.7394	7.5237e-14	131.236	1.7394	7.5237e-14	131.236	0	1	0	-	79	75	78	50	14	23	11	17	5.54573	5.54782	5.57122	5.40135	5.09197	5.17315	5.08204	5.14902	0.815015	0.820736	0.86975	0.565727	0.142657	0.240059	0.12678	0.203964
ENSMUSG00000037362	Nov	chr15:54745701-54754039	+	2869	1.73564	3.08524e-11	105.107	1.73564	3.08524e-11	105.107	0	1	0	-	90	75	115	55	27	10	8	25	5.75468	5.69667	5.91737	5.58379	5.34741	5.19892	5.19436	5.36947	1.38061	1.22038	1.90672	0.925316	0.40909	0.155196	0.1371	0.445999
ENSMUSG00000029754	Dlx6	chr6:6863333-6868568	+	2375	1.7336	2.35619e-34	336.278	1.7336	2.35619e-34	336.278	0	1	0	-	244	224	240	211	69	84	45	54	7.38145	7.36244	7.42092	7.34681	6.68551	6.7759	6.57747	6.65843	4.52153	4.40299	4.80693	4.28822	1.26291	1.5748	0.931595	1.16374
ENSMUSG00000034614	Pik3ip1	chr11:3330400-3342971	+	4272	1.73161	8.2312e-28	270.845	1.73161	8.2312e-28	270.845	0	1	0	-	190	166	208	147	55	52	40	44	6.98751	6.93804	7.09626	6.88549	6.37002	6.35539	6.30783	6.35394	1.95741	1.81401	2.31607	1.6609	0.559651	0.541979	0.46037	0.527164
ENSMUSG00000070280	Slc22a14	chr9:119169454-119365553	-	2432	1.72846	6.87127e-09	81.6296	1.72846	6.87127e-09	81.6296	0	1	0	-	32	40	25	27	4	6	9	1	4.19198	4.26713	4.15154	4.17353	3.95041	3.97125	4.01096	3.92716	0.57909	0.76782	0.488987	0.535868	0.0714961	0.109849	0.181952	0.0210456
ENSMUSG00000002985	Apoe	chr7:19696108-19699166	-	1980	1.72766	3.99986e-48	473.98	1.72766	3.99986e-48	473.98	-1.80947	1.33048e-08	78.7599	chr7:19698524-19698620	687	574	525	498	148	211	161	121	8.87531	8.77118	8.70716	8.68316	7.76991	7.99088	7.88801	7.75266	15.2704	13.5335	12.6129	12.1401	3.24925	4.7449	3.99797	3.12784
ENSMUSG00000031343	Gabra3	chrX:72432680-72656848	-	3924	1.72728	2.56553e-37	365.908	1.72728	2.56553e-37	365.908	0	1	0	-	281	273	300	216	80	86	62	68	7.60893	7.63086	7.71184	7.48967	6.87807	6.91657	6.82484	6.88235	3.15164	3.24786	3.63674	2.65694	0.886231	0.975842	0.776857	0.886961
ENSMUSG00000097535	Gm26592	chr9:21034289-21037782	-	1730	1.72623	4.8326e-11	103.158	1.72623	4.8326e-11	103.158	0	1	0	-	47	42	37	46	10	12	6	8	4.76357	4.74596	4.71242	4.7865	4.47224	4.49255	4.44492	4.47078	1.19567	1.13336	1.01736	1.28342	0.25127	0.308848	0.170523	0.236684
ENSMUSG00000020926	Adam11	chr11:102761438-102780262	+	5669	1.72303	6.29363e-20	192.011	1.72303	6.29363e-20	192.011	0	1	0	-	105	104	92	106	26	26	25	28	6.10783	6.1326	6.07707	6.16197	5.62262	5.6259	5.64345	5.68125	0.815159	0.856426	0.771973	0.902521	0.199367	0.20421	0.216826	0.252799
ENSMUSG00000017491	Rarb	chr14:16430841-16575472	-	3034	1.71799	4.28507e-43	423.68	1.71799	4.28507e-43	423.68	0	1	0	-	336	353	350	301	104	88	75	109	7.9218	8.00579	8.00978	7.91162	7.18773	7.11527	7.0943	7.2974	4.87397	5.43153	5.48748	4.7886	1.49006	1.29145	1.21541	1.8388
ENSMUSG00000034829	Nxnl1	chr8:71560555-71566649	-	2777	1.71617	4.182e-08	73.7862	1.71617	4.182e-08	73.7862	0	1	0	-	35	30	14	23	1	6	2	4	3.91146	3.88762	3.75571	3.83859	3.62749	3.6766	3.64226	3.66597	0.554692	0.504323	0.239813	0.39977	0.0156535	0.0962023	0.0354105	0.073724
ENSMUSG00000045777	Ifitm10	chr7:142325836-142373753	-	4789	1.71266	5.55367e-26	252.554	1.71266	5.55367e-26	252.554	0	1	0	-	159	153	147	140	33	48	46	35	6.7259	6.73786	6.72159	6.70634	6.06564	6.17816	6.20103	6.13165	1.46121	1.49145	1.46013	1.41105	0.29954	0.446279	0.472271	0.374066
ENSMUSG00000029032	Arhgef16	chr4:154278485-154301676	-	5481	1.71062	9.22776e-10	90.349	1.71062	9.22776e-10	90.349	0	1	0	-	30	40	41	38	12	5	7	5	4.45059	4.54155	4.55284	4.53691	4.30126	4.2355	4.26513	4.24769	0.240891	0.340693	0.355832	0.334643	0.0951716	0.0406182	0.0627938	0.0466912
ENSMUSG00000071637	Cebpd	chr16:15887285-15888466	+	1180	1.70211	7.79542e-101	1001.08	1.70211	7.79542e-101	1001.08	0	1	0	-	2445	2592	2245	2062	669	835	662	578	10.8535	10.9671	10.8426	10.7852	9.7492	9.93165	9.82937	9.75937	91.1919	102.545	90.5013	84.346	24.6451	31.5076	27.5838	25.0709
ENSMUSG00000032816	Igdcc4	chr9:65101485-65137940	+	6366	1.69987	2.97458e-58	575.266	1.69987	2.97458e-58	575.266	-1.27357	0.525864	2.79127	chr9:65131344-65131472	403	408	373	400	109	128	113	108	8.19482	8.25202	8.19124	8.26648	7.35199	7.44237	7.43311	7.4336	2.78611	2.99197	2.78717	3.03285	0.744296	0.895269	0.872751	0.868324
ENSMUSG00000073565	Prr16	chr18:51117897-51304641	+	2224	1.69855	1.84835e-13	127.332	1.69855	1.84835e-13	127.332	0	1	0	-	67	67	54	69	21	17	15	9	5.39017	5.41332	5.33452	5.44083	5.06854	5.03635	5.03611	4.98278	1.32587	1.40638	1.15499	1.49752	0.41046	0.340349	0.331616	0.207125
ENSMUSG00000046245	Pilra	chr5:137821951-137836268	-	3077	1.6971	2.19793e-40	396.58	1.6971	2.19793e-40	396.58	0	1	0	-	420	377	413	286	113	124	106	83	8.17755	8.1383	8.22271	7.95439	7.3149	7.3706	7.34458	7.24836	6.00733	5.71975	6.38474	4.48638	1.59638	1.79434	1.69378	1.38062
ENSMUSG00000027296	Itpka	chr2:119742336-119751263	+	1818	1.6958	6.20059e-15	142.076	1.6958	6.20059e-15	142.076	0	1	0	-	97	101	77	71	14	32	19	21	5.88312	5.93218	5.80741	5.78181	5.33319	5.48758	5.40194	5.43033	2.34821	2.59353	2.01473	1.88505	0.33475	0.78373	0.513852	0.591221
ENSMUSG00000099143	H19_1	chr7:142576852-142576923	+	71	1.69383	2.39343e-11	106.21	1.69383	2.39343e-11	106.21	0	1	0	-	66	59	55	39	20	8	10	11	5.17736	5.15553	5.13401	5.02698	4.8529	4.7456	4.77846	4.79488	40.9115	38.7933	36.8489	26.5133	12.245	5.01697	6.925	7.92974
ENSMUSG00000037379	Spon2	chr5:33213517-33218238	-	2237	1.68703	5.50013e-25	242.596	1.68703	5.50013e-25	242.596	0	1	0	-	285	258	211	224	75	57	46	90	7.54376	7.51354	7.38049	7.43885	6.7709	6.66911	6.63636	6.9316	5.6071	5.38415	4.4868	4.83326	1.45741	1.13454	1.01104	2.05921
ENSMUSG00000023367	Tmem176a	chr6:48841482-48845364	+	1119	1.68559	7.90075e-143	1421.02	1.68559	7.90075e-143	1421.02	0	1	0	-	3379	3245	2806	2684	987	916	818	888	11.2985	11.3175	11.191	11.1719	10.2191	10.1705	10.1618	10.2611	132.898	135.378	119.283	115.774	38.3419	36.4482	35.9419	40.617
ENSMUSG00000022440	C1qtnf6	chr15:78523345-78529625	-	2402	1.68558	2.70598e-70	695.677	1.68558	2.70598e-70	695.677	0	1	0	-	854	751	685	637	242	217	179	221	9.23685	9.17554	9.10697	9.06505	8.26127	8.19981	8.14651	8.3083	15.6475	14.5959	13.5656	12.8004	4.37954	4.02251	3.66402	4.70916
ENSMUSG00000046699	Slitrk4	chrX:64264884-64276996	-	8743	1.6826	9.46416e-08	70.2392	1.6826	9.46416e-08	70.2392	0	1	0	-	25	22	19	20	4	6	1	0	3.62607	3.6119	3.588	3.60086	3.44081	3.46135	3.4144	3.40434	0.125846	0.11747	0.103375	0.110415	0.0198877	0.0305563	0.00562364	0
ENSMUSG00000038811	Gngt2	chr11:95837215-95845734	+	1877	1.67312	7.56719e-09	81.2107	1.67312	7.56719e-09	81.2107	0	1	0	-	51	39	25	30	3	11	7	6	4.53801	4.47441	4.36997	4.41568	4.16632	4.24183	4.2143	4.20799	1.19582	0.969982	0.633572	0.771462	0.0694773	0.260939	0.183363	0.163611
ENSMUSG00000019066	Rab3d	chr9:21907490-21918192	-	4196	1.67048	1.36339e-81	808.654	1.67048	1.36339e-81	808.654	0	1	0	-	976	951	832	746	254	282	260	248	9.46919	9.49968	9.392	9.31714	8.42249	8.50072	8.51618	8.5144	10.237	10.5805	9.4321	8.58146	2.63138	2.99243	3.04661	3.02511
ENSMUSG00000027584	Oprl1	chr2:181715015-181720985	+	3753	1.66999	5.87811e-09	82.3076	1.66999	5.87811e-09	82.3076	0	1	0	-	33	31	30	32	6	6	3	9	4.2661	4.26451	4.25966	4.2815	4.03774	4.0388	4.01514	4.08319	0.386986	0.385608	0.380245	0.411556	0.0694958	0.0711841	0.0393026	0.122741
ENSMUSG00000043673	Kcns3	chr12:11090201-11150842	-	3059	1.6685	2.57795e-07	65.8873	1.6685	2.57795e-07	65.8873	0	1	0	-	15	15	14	9	1	0	1	0	2.78195	2.7892	2.78165	2.73597	2.65073	2.64064	2.65338	2.64285	0.21581	0.228915	0.217705	0.142011	0.0142104	0	0.0160731	0
ENSMUSG00000006218	Fam131c	chr4:141368219-141384175	+	1433	1.66358	1.15318e-18	179.381	1.66358	1.15318e-18	179.381	0	1	0	-	129	121	88	129	31	30	30	35	6.36475	6.36114	6.20216	6.41863	5.80922	5.80504	5.83401	5.8885	3.9619	3.94187	2.92117	4.34511	0.940376	0.932149	1.02933	1.2501
ENSMUSG00000029436	Mmp17	chr5:129584168-129608875	+	4395	1.65706	1.6376e-30	297.858	1.65706	1.6376e-30	297.858	0	1	0	-	255	234	199	174	69	64	56	59	7.37362	7.35392	7.25115	7.17812	6.6468	6.62262	6.61462	6.6531	2.55353	2.48554	2.15385	1.91094	0.682458	0.648382	0.62648	0.687097
ENSMUSG00000023439	Gnb3	chr6:124834239-124840275	-	2632	1.65615	1.28753e-07	68.9024	1.65615	1.28753e-07	68.9024	0	1	0	-	21	26	15	26	3	1	4	4	3.6456	3.698	3.60389	3.70557	3.48257	3.46265	3.4992	3.50182	0.35115	0.461159	0.271098	0.47681	0.0495475	0.016917	0.0747227	0.0777855
ENSMUSG00000046318	Ccbe1	chr18:66045301-66302739	-	9511	1.64636	3.63311e-35	344.397	1.64636	3.63311e-35	344.397	-1.45509	0.0413806	13.832	chr18:66076308-66076412	271	232	235	203	73	73	59	71	7.49755	7.42821	7.44689	7.3616	6.75326	6.75913	6.71875	6.81403	1.25401	1.13874	1.17534	1.03021	0.333644	0.341749	0.305003	0.382082
ENSMUSG00000051811	Cox6b2	chr7:4751791-4753094	-	1108	1.64553	1.05565e-07	69.7648	1.64553	1.05565e-07	69.7648	0	1	0	-	25	29	18	21	3	2	3	6	3.76691	3.8111	3.71997	3.75078	3.57136	3.56182	3.57731	3.61285	0.993024	1.22186	0.772775	0.914823	0.117698	0.0803712	0.133125	0.277164
ENSMUSG00000053310	Nrgn	chr9:37544491-37552904	-	1453	1.64372	1.60568e-12	117.943	1.64372	1.60568e-12	117.943	0	1	0	-	59	72	53	56	16	15	13	16	5.27865	5.38095	5.26523	5.29414	4.96339	4.95665	4.95458	4.99145	1.78709	2.31329	1.73512	1.86029	0.478675	0.459659	0.439902	0.56361
ENSMUSG00000085526	Gm16083	chr1:130462575-130557075	+	2547	1.64318	6.18613e-08	72.0858	1.64318	6.18613e-08	72.0858	0	1	0	-	27	30	19	26	4	3	7	3	3.9209	3.95733	3.86711	3.93245	3.71937	3.71006	3.75833	3.71811	0.466546	0.549864	0.35485	0.492722	0.068268	0.0524448	0.135129	0.0602861
ENSMUSG00000070802	Pnmal2	chr7:16944681-16948828	+	4147	1.64254	7.50706e-31	301.245	1.64254	7.50706e-31	301.245	0	1	0	-	251	200	223	210	54	83	65	56	7.38897	7.27223	7.35626	7.33102	6.58289	6.75933	6.70096	6.66108	2.66379	2.25143	2.55795	2.44424	0.566038	0.891157	0.770651	0.69116
ENSMUSG00000053552	Ebf4	chr2:130295168-130370481	+	3236	1.64236	2.59523e-18	175.858	1.64236	2.59523e-18	175.858	0	1	0	-	160	146	148	119	25	47	54	31	6.68867	6.66811	6.68452	6.5704	5.96043	6.12922	6.21562	6.05599	2.17606	2.10624	2.17557	1.77499	0.335828	0.646695	0.820472	0.490318
ENSMUSG00000066800	Rnasel	chr1:153749425-153764221	+	6641	1.63874	9.05982e-11	100.429	1.63874	9.05982e-11	100.429	0	1	0	-	57	56	61	49	10	25	10	8	5.16155	5.17593	5.21365	5.14093	4.80317	4.93774	4.81875	4.80377	0.377747	0.393657	0.436935	0.35614	0.0654565	0.167616	0.0740363	0.0616568
ENSMUSG00000037139	Myom3	chr4:135759714-135815564	+	6038	1.6362	4.45746e-09	83.5091	1.6362	4.45746e-09	83.5091	0	1	0	-	40	43	40	34	4	15	10	4	4.60441	4.64283	4.6247	4.58497	4.30411	4.40985	4.37582	4.31657	0.291559	0.332459	0.315128	0.271796	0.0287974	0.110614	0.0814302	0.0339072
ENSMUSG00000059325	Hopx	chr5:77086987-77115156	-	1549	1.63606	2.98234e-29	285.254	1.63606	2.98234e-29	285.254	0	1	0	-	282	278	228	208	76	88	50	77	7.56824	7.60092	7.46727	7.42009	6.8124	6.88352	6.70138	6.89283	8.0123	8.37831	7.00171	6.48141	2.13279	2.52954	1.58707	2.54427
ENSMUSG00000020010	Vnn3	chr10:23851461-23869843	+	1811	1.63601	5.63432e-10	92.4916	1.63601	5.63432e-10	92.4916	0	1	0	-	50	34	45	39	10	11	11	6	4.77449	4.67648	4.76253	4.7252	4.46351	4.47447	4.48758	4.44051	1.2151	0.876443	1.18199	1.03945	0.240031	0.270448	0.298643	0.169573
ENSMUSG00000087142	Gm12454	chr4:43504427-43508747	-	1082	1.63462	1.88073e-12	117.257	1.63462	1.88073e-12	117.257	0	1	0	-	59	65	64	54	11	18	18	14	5.29204	5.3517	5.35073	5.29399	4.93159	4.99684	5.01595	4.98533	2.39985	2.80446	2.81367	2.40893	0.441928	0.740722	0.817944	0.662255
ENSMUSG00000027894	Slc6a17	chr3:107467542-107518018	-	10283	1.63059	1.21775e-53	529.144	1.63059	1.21775e-53	529.144	0	1	0	-	541	622	540	466	175	184	170	131	8.66107	8.83023	8.72095	8.61815	7.85777	7.89615	7.91202	7.78711	2.31546	2.8238	2.49801	2.18738	0.739783	0.796724	0.812844	0.652043
ENSMUSG00000006567	Atp7b	chr8:21992784-22060305	-	6505	1.62951	3.81144e-09	84.1891	1.62951	3.81144e-09	84.1891	0	1	0	-	34	31	40	35	10	8	6	6	4.43034	4.42143	4.49423	4.46245	4.23271	4.2151	4.20461	4.20857	0.230034	0.222473	0.292505	0.259704	0.066825	0.0547587	0.0453505	0.0472094
ENSMUSG00000037108	Zcwpw1	chr5:137787797-137822621	+	2541	1.62673	5.0228e-66	652.991	1.62673	5.0228e-66	652.991	0	1	0	-	1495	1377	1423	1125	396	502	437	328	10.1122	10.0914	10.135	9.94111	9.02381	9.2073	9.18002	9.00517	25.8938	25.2984	26.6392	21.3701	6.77449	8.79649	8.45581	6.60684
ENSMUSG00000040710	St8sia4	chr1:95587683-95667594	-	5411	1.61779	3.54334e-09	84.5059	1.61779	3.54334e-09	84.5059	0	1	0	-	32	44	63	38	9	10	13	7	4.69908	4.80482	4.93854	4.77096	4.50526	4.51635	4.55925	4.50279	0.260275	0.379611	0.553839	0.338972	0.0723021	0.0822873	0.118126	0.0662133
ENSMUSG00000020866	Cacna1g	chr11:94408390-94474198	-	10137	1.61764	4.04798e-98	973.928	1.61764	4.04798e-98	973.928	-1.04884	0.000156685	38.0497	chr11:94426416-94426504	1024	1029	911	940	303	336	270	307	9.58733	9.64584	9.54845	9.59845	8.62783	8.70844	8.62946	8.74889	4.4458	4.73881	4.27493	4.47586	1.29933	1.47584	1.30958	1.55008
ENSMUSG00000024140	Epas1	chr17:86753906-86833410	+	5309	1.61644	7.68883e-12	111.141	1.61644	7.68883e-12	111.141	0	1	0	-	67	66	80	52	13	16	25	13	5.43894	5.456	5.54514	5.37823	5.04688	5.07618	5.17684	5.07302	0.55542	0.580356	0.7168	0.472768	0.106443	0.134189	0.231529	0.12533
ENSMUSG00000036545	Adamts2	chr11:50602083-50807573	+	9336	1.61559	4.37452e-101	1003.59	1.61559	4.37452e-101	1003.59	0	1	0	-	1425	1438	1274	1265	495	480	356	362	10.0717	10.1358	10.0365	10.0524	9.19184	9.17859	9.03658	9.07986	6.71759	7.19054	6.49126	6.54015	2.30478	2.28924	1.87485	1.9846
ENSMUSG00000030246	Ldhb	chr6:142490248-142507957	-	1570	1.61161	6.70904e-67	661.733	1.61161	6.70904e-67	661.733	0	1	0	-	1355	1326	1099	1102	441	362	309	400	9.96663	10.0021	9.84233	9.86695	9.03745	8.90488	8.86747	9.08351	37.9839	39.4282	33.298	33.8797	12.2103	10.2664	9.67692	13.0402
ENSMUSG00000036995	Asap3	chr4:136206364-136245216	+	4225	1.60842	7.18945e-56	551.433	1.60842	7.18945e-56	551.433	-1.1187	1	0	chr4:136227568-136227712	494	513	470	404	146	169	136	131	8.49564	8.57629	8.51478	8.41118	7.65544	7.74777	7.68326	7.68794	5.14588	5.66831	5.29166	4.61543	1.50215	1.78103	1.58267	1.58697
ENSMUSG00000063704	Mapk15	chr15:75993768-75999152	+	2561	1.60503	1.49497e-12	118.254	1.60503	1.49497e-12	118.254	0	1	0	-	75	74	76	49	18	24	16	14	5.52997	5.54873	5.56626	5.40172	5.13639	5.19006	5.1398	5.12832	1.28888	1.34892	1.41164	0.923516	0.305527	0.417265	0.307177	0.279797
ENSMUSG00000036158	Prickle1	chr15:93499113-93595891	-	4345	1.60129	1.02785e-38	379.881	1.60129	1.02785e-38	379.881	-1.10663	0.699699	1.55089	chr15:93510672-93510784	463	532	556	386	135	160	150	147	8.45873	8.62299	8.67217	8.39098	7.62919	7.73209	7.75622	7.77093	4.68976	5.71591	6.08703	4.288	1.35061	1.63961	1.69738	1.73162
ENSMUSG00000023411	Nfatc4	chr14:55824794-55833943	+	4019	1.60111	2.18541e-75	746.605	1.60111	2.18541e-75	746.605	0	1	0	-	787	775	726	625	231	255	206	221	9.17896	9.21797	9.17256	9.06371	8.24928	8.32254	8.25188	8.32627	8.61819	9.00216	8.59289	7.50619	2.4985	2.82509	2.52016	2.81448
ENSMUSG00000097045	Gm26641	chr1:171423184-171437318	-	954	1.5994	1.02133e-07	69.9083	1.5994	1.02133e-07	69.9083	0	1	0	-	35	23	22	24	6	4	6	3	4.02101	3.93857	3.93252	3.95435	3.77831	3.75946	3.78718	3.75754	1.61465	1.12549	1.09697	1.21428	0.273394	0.18669	0.30923	0.160952
ENSMUSG00000026023	Cdk15	chr1:59256905-59352993	+	2507	1.59731	1.43159e-07	68.4418	1.59731	1.43159e-07	68.4418	0	1	0	-	23	22	26	30	7	3	6	2	3.8921	3.89441	3.93091	3.96917	3.75225	3.71361	3.75136	3.71035	0.403769	0.409668	0.493332	0.577597	0.121375	0.0532816	0.117673	0.040832
ENSMUSG00000050821	Fam131a	chr16:20693281-20703048	+	2853	1.58937	1.88584e-21	207.245	1.58937	1.88584e-21	207.245	0	1	0	-	222	178	151	148	55	42	47	61	7.10164	6.99281	6.89758	6.89989	6.38219	6.29922	6.37189	6.48612	3.42461	2.9126	2.51765	2.5039	0.838006	0.655477	0.80998	1.09434
ENSMUSG00000029755	Dlx5	chr6:6877804-6882085	-	1423	1.58672	7.79485e-18	171.082	1.58672	7.79485e-18	171.082	0	1	0	-	112	137	126	96	33	37	28	38	6.31697	6.46112	6.42045	6.28665	5.85617	5.89009	5.84897	5.94396	3.46396	4.49447	4.21198	3.2563	1.00808	1.15773	0.967457	1.36679
ENSMUSG00000024534	Sncaip	chr18:52767708-52915935	+	4522	1.58353	8.93377e-38	370.49	1.58353	8.93377e-38	370.49	0	1	0	-	426	406	423	386	106	175	126	103	8.28027	8.28918	8.33339	8.27898	7.38436	7.66738	7.5373	7.45523	4.14609	4.1914	4.4497	4.12016	1.01897	1.72313	1.36999	1.16582
ENSMUSG00000000392	Fap	chr2:62500942-62574075	-	5662	1.58343	9.48325e-07	60.2304	1.58343	9.48325e-07	60.2304	0	1	0	-	15	15	22	13	1	3	2	1	3.15646	3.16378	3.22622	3.15008	3.02835	3.04856	3.04215	3.03257	0.116595	0.123676	0.18483	0.110823	0.00767743	0.0235918	0.0173675	0.00903972
ENSMUSG00000024371	C2	chr17:34862603-34898265	-	3872	1.58233	4.16139e-61	603.808	1.58233	4.16139e-61	603.808	-1.61237	4.24309e-40	393.723	chr17:34895408-34895568	527	463	438	436	148	159	146	136	8.54963	8.49152	8.4574	8.47334	7.66427	7.71297	7.72489	7.71027	5.99011	5.58224	5.38095	5.43512	1.66155	1.8284	1.85394	1.79775
ENSMUSG00000040723	Rcsd1	chr1:165648944-165708094	-	2670	1.58213	4.48237e-24	233.485	1.58213	4.48237e-24	233.485	0	1	0	-	165	151	149	156	58	45	36	48	6.81334	6.79464	6.79472	6.83764	6.30675	6.22549	6.1941	6.3001	2.71977	2.64015	2.65458	2.82014	0.944284	0.750432	0.662933	0.920141
ENSMUSG00000008999	Bmp7	chr2:172868011-172940321	-	4019	1.57839	3.98295e-09	83.998	1.57839	3.98295e-09	83.998	-1.14504	1	0	chr2:172939648-172940320	47	38	43	48	4	11	16	10	4.82408	4.77689	4.81795	4.86153	4.47491	4.54392	4.60613	4.55285	0.514682	0.441396	0.508945	0.576476	0.0432641	0.121867	0.19574	0.127352
ENSMUSG00000042647	Acad12	chr5:121598283-121618938	-	5007	1.5783	2.77853e-16	155.562	1.5783	2.77853e-16	155.562	0	1	0	-	103	93	91	91	36	32	22	19	6.05099	6.02875	6.02462	6.03614	5.6552	5.62848	5.57157	5.55423	0.905356	0.867099	0.864538	0.877246	0.312544	0.284566	0.216035	0.194223
ENSMUSG00000092511	Gm20547	chr17:34856411-34882042	-	3902	1.57149	1.81131e-45	447.42	1.57149	1.81131e-45	447.42	-1.7467	3.35038e-17	164.749	chr17:34857216-34857320	358	337	311	316	97	117	106	97	7.99392	7.99278	7.94174	7.97224	7.18258	7.28249	7.28667	7.26501	4.0379	4.03186	3.79135	3.90893	1.08061	1.33508	1.33566	1.27236
ENSMUSG00000056174	Col8a2	chr4:126286792-126314330	+	4489	1.57081	1.1009e-119	1189.58	1.57081	1.1009e-119	1189.58	0	1	0	-	2808	2686	2286	2248	807	909	773	749	11.0437	11.0588	10.9185	10.9258	9.96628	10.0704	10.0226	10.0321	27.5301	27.9331	24.2241	24.1715	7.81466	9.01622	8.46658	8.53998
ENSMUSG00000023885	Thbs2	chr17:14665499-14694262	-	5922	1.56885	5.12577e-13	122.902	1.56885	5.12577e-13	122.902	0	1	0	-	67	83	71	61	21	21	16	20	5.53659	5.65366	5.58989	5.53685	5.2162	5.21889	5.19423	5.24071	0.497927	0.654294	0.570309	0.497186	0.154148	0.157892	0.13284	0.172857
ENSMUSG00000019737	Syne4	chr7:30314806-30319046	+	2946	1.56419	1.70429e-16	157.685	1.56419	1.70429e-16	157.685	0	1	0	-	125	88	114	117	31	28	31	39	6.32161	6.17043	6.30996	6.33719	5.78535	5.7653	5.81813	5.8962	1.8674	1.39448	1.84074	1.91695	0.45742	0.42319	0.517377	0.677574
ENSMUSG00000062515	Fabp4	chr3:10204346-10208576	-	637	1.56096	7.04165e-10	91.5233	1.56096	7.04165e-10	91.5233	0	1	0	-	59	49	53	34	10	13	14	12	5.03773	4.99185	5.02385	4.89181	4.66849	4.69807	4.72292	4.70973	4.07636	3.59104	3.95783	2.5763	0.682412	0.908687	1.0806	0.964198
ENSMUSG00000032492	Pth1r	chr9:110722087-110743686	-	2484	1.55376	1.24259e-08	79.0567	1.55376	1.24259e-08	79.0567	0	1	0	-	44	39	42	33	6	11	15	5	4.67131	4.65214	4.67824	4.61585	4.36328	4.41239	4.46447	4.36725	0.77958	0.732953	0.8043	0.641239	0.104999	0.197175	0.296905	0.103025
ENSMUSG00000045392	Olfr1033	chr2:86034764-86044808	+	3664	1.55197	1.79222e-06	57.4661	1.55197	1.79222e-06	57.4661	0	1	0	-	17	17	10	19	0	3	3	0	3.11385	3.12203	3.05834	3.14561	2.95474	2.98584	2.99016	2.95774	0.204199	0.216599	0.129827	0.250297	0	0.0364566	0.0402573	0
ENSMUSG00000037709	Fam13a	chr6:58932089-59024549	-	6328	1.55139	1.73363e-10	97.6104	1.55139	1.73363e-10	97.6104	0	1	0	-	57	54	71	47	10	17	14	19	5.2269	5.22804	5.34128	5.19228	4.86983	4.93557	4.92522	4.98113	0.396431	0.398374	0.533719	0.3585	0.0686941	0.119617	0.108778	0.153678
ENSMUSG00000041757	Plekha6	chr1:133246096-133303435	+	7457	1.55044	3.59204e-35	344.447	1.55044	3.59204e-35	344.447	-1.30251	0.000843512	30.7391	chr1:133273856-133274376	257	251	233	225	74	80	78	74	7.50543	7.53051	7.4872	7.47943	6.80901	6.84818	6.88513	6.8824	1.5168	1.57135	1.48632	1.45638	0.431374	0.477679	0.514291	0.507916
ENSMUSG00000038967	Pdk2	chr11:95026257-95041354	-	3163	1.5471	7.69847e-48	471.136	1.5471	7.69847e-48	471.136	0	1	0	-	403	405	356	336	123	131	110	119	8.18445	8.23557	8.14419	8.11796	7.40566	7.44661	7.41075	7.47699	5.60745	5.97749	5.35391	5.12741	1.69041	1.84409	1.7099	1.92563
ENSMUSG00000022754	Tmem45a	chr16:56805160-56886166	-	3056	1.54689	2.55903e-39	385.919	1.54689	2.55903e-39	385.919	0	1	0	-	523	478	531	406	136	203	146	135	8.57005	8.54466	8.644	8.44273	7.64683	7.8906	7.75385	7.7352	7.53196	7.30193	8.26536	6.41255	1.93451	2.95769	2.34897	2.26102
ENSMUSG00000021259	Cyp46a1	chr12:108334376-108362231	+	2119	1.54681	1.2511e-11	109.027	1.54681	1.2511e-11	109.027	0	1	0	-	71	116	80	60	25	22	26	17	5.70824	5.97263	5.79172	5.67871	5.3955	5.37342	5.43189	5.35936	1.47464	2.55558	1.79589	1.36672	0.512856	0.462277	0.603283	0.410622
ENSMUSG00000043587	Acpl2	chr9:96823343-96892669	-	4412	1.54641	4.645e-40	393.33	1.54641	4.645e-40	393.33	0	1	0	-	351	350	324	283	121	112	83	103	7.97304	8.01654	7.96735	7.88326	7.2872	7.25418	7.16243	7.28966	3.50131	3.70336	3.49325	3.09606	1.19216	1.1303	0.924956	1.19489
ENSMUSG00000001604	Tcea3	chr4:136247728-136274898	+	1400	1.54554	1.6006e-09	87.9572	1.54554	1.6006e-09	87.9572	0	1	0	-	58	50	36	46	8	15	15	10	5.0035	4.97079	4.87302	4.95478	4.62182	4.68845	4.70467	4.66123	1.82331	1.66727	1.22319	1.58594	0.248398	0.47706	0.526795	0.365592
ENSMUSG00000026188	Tmem169	chr1:72284368-72303104	+	3054	1.54517	3.8753e-07	64.1169	1.54517	3.8753e-07	64.1169	0	1	0	-	30	18	27	21	6	5	4	3	3.88757	3.79946	3.87904	3.83235	3.68296	3.67406	3.6703	3.66189	0.432326	0.275148	0.420548	0.331901	0.085402	0.0728973	0.0643975	0.0502779
ENSMUSG00000032246	Calml4	chr9:62858103-62875918	+	861	1.54346	2.68952e-08	75.7032	1.54346	2.68952e-08	75.7032	0	1	0	-	35	50	32	30	11	6	8	9	4.5144	4.63847	4.50939	4.49904	4.31838	4.27198	4.30207	4.31734	1.78906	2.711	1.76794	1.68181	0.555361	0.310283	0.456841	0.535013
ENSMUSG00000046329	Slc25a23	chr17:57043710-57059863	-	5294	1.54323	4.05698e-115	1143.92	1.54323	4.05698e-115	1143.92	0	1	0	-	1646	1580	1427	1415	494	580	490	437	10.282	10.2998	10.2181	10.2328	9.28141	9.41225	9.36169	9.3091	13.6838	13.9327	12.8221	12.9012	4.05629	4.87814	4.55083	4.22496
ENSMUSG00000023963	Cyp39a1	chr17:43667424-43751431	+	3053	1.53964	1.20426e-41	409.193	1.53964	1.20426e-41	409.193	0	1	0	-	523	494	451	357	158	169	125	136	8.53077	8.53257	8.46866	8.30119	7.68793	7.7354	7.62425	7.69657	7.53936	7.55376	7.027	5.64416	2.24966	2.46473	2.01308	2.28001
ENSMUSG00000039007	Cpq	chr15:33083128-33594552	+	1923	1.53933	7.16907e-60	591.445	1.53933	7.16907e-60	591.445	0	1	0	-	1107	1043	907	825	286	372	323	283	9.66347	9.66363	9.55014	9.4877	8.59626	8.788	8.76051	8.69897	25.3354	25.3203	22.4362	20.7077	6.46506	8.61338	8.25851	7.53237
ENSMUSG00000001663	Gstt1	chr10:75783812-75798584	-	1528	1.53766	1.88468e-06	57.2476	1.53766	1.88468e-06	57.2476	0	1	0	-	97	88	88	58	14	11	1	19	5.6872	5.66678	5.67318	5.49817	5.12455	5.09819	5.00566	5.20341	2.79388	2.68858	2.73955	1.83216	0.398282	0.320538	0.0321777	0.636436
ENSMUSG00000040428	Plekha4	chr7:45526329-45554229	+	4187	1.53722	6.97997e-37	361.561	1.53722	6.97997e-37	361.561	0	1	0	-	292	311	273	250	92	106	83	81	7.72201	7.81322	7.72588	7.67922	7.03394	7.10895	7.04326	7.05358	3.0693	3.46753	3.10156	2.88201	0.955148	1.12723	0.974661	0.990163
ENSMUSG00000059022	Kcp	chr6:29473161-29507952	-	7806	1.53518	2.96969e-25	245.273	1.53518	2.96969e-25	245.273	-1.65812	0.0709145	11.4926	chr6:29496800-29496976	331	377	272	275	77	127	109	81	7.88838	8.03566	7.79596	7.82178	7.03013	7.2776	7.25217	7.12893	1.8662	2.25463	1.65753	1.70044	0.428793	0.724412	0.686557	0.531106
ENSMUSG00000044197	Gpr146	chr5:139377741-139396415	+	6379	1.53494	2.29579e-22	216.391	1.53494	2.29579e-22	216.391	0	1	0	-	147	159	155	139	49	51	52	35	6.72289	6.80567	6.79821	6.7464	6.22795	6.24608	6.2914	6.18025	1.0142	1.16361	1.15584	1.05177	0.33391	0.355982	0.400801	0.280828
ENSMUSG00000085645	0610040B09Rik	chr11:96291023-96306910	-	696	1.53482	7.87207e-18	171.039	1.53482	7.87207e-18	171.039	0	1	0	-	144	131	120	93	45	38	34	31	6.50229	6.48085	6.4388	6.31683	5.9903	5.94462	5.94567	5.93443	9.10569	8.78669	8.20149	6.44958	2.81054	2.431	2.40186	2.2797
ENSMUSG00000023982	Guca1a	chr17:47394559-47400584	-	871	1.53459	2.59339e-17	165.861	1.53459	2.59339e-17	165.861	0	1	0	-	136	129	98	100	40	41	28	31	6.41741	6.42009	6.27915	6.30162	5.90291	5.91425	5.844	5.88173	6.87195	6.91409	5.35215	5.54166	1.99631	2.09593	1.58059	1.82166
ENSMUSG00000060962	Dmkn	chr7:30763755-30781066	+	2191	1.52664	1.35315e-06	58.6865	1.52664	1.35315e-06	58.6865	0	1	0	-	32	19	20	16	2	7	4	1	3.72912	3.63747	3.64822	3.6166	3.4769	3.5257	3.50264	3.4723	0.642787	0.404832	0.434218	0.352481	0.0396802	0.142254	0.0897627	0.0233605
ENSMUSG00000036502	Tmem255a	chrX:38196572-38252439	-	4490	1.5217	6.44105e-35	341.91	1.5217	6.44105e-35	341.91	0	1	0	-	318	287	261	254	112	83	80	88	7.78309	7.75031	7.69052	7.68821	7.12758	6.99132	7.0241	7.09016	3.11703	2.984	2.76512	2.73052	1.08432	0.82308	0.876036	1.00314
ENSMUSG00000000739	Sult5a1	chr8:123142846-123158315	-	1764	1.52132	1.90641e-06	57.1978	1.52132	1.90641e-06	57.1978	0	1	0	-	9	11	13	7	0	0	0	0	2.29602	2.31934	2.33911	2.28395	2.21069	2.21082	2.2119	2.21237	0.224545	0.29111	0.350562	0.191539	0	0	0	0
ENSMUSG00000028789	Adc	chr4:128930232-128962442	-	4024	1.5207	1.65949e-31	307.8	1.5207	1.65949e-31	307.8	0	1	0	-	319	332	256	261	107	102	71	97	7.81544	7.89083	7.70668	7.73816	7.13524	7.1183	7.00361	7.16936	3.48893	3.85162	3.02623	3.13069	1.15588	1.12863	0.867518	1.23378
ENSMUSG00000060572	Mfap2	chr4:141010417-141015984	+	1211	1.51882	3.25298e-17	164.877	1.51882	3.25298e-17	164.877	0	1	0	-	180	158	136	131	33	53	38	60	6.84482	6.79918	6.71672	6.7087	6.11009	6.25548	6.18524	6.35984	6.54166	6.09083	5.34214	5.22138	1.18456	1.94869	1.54283	2.5359
ENSMUSG00000020019	Ntn4	chr10:93640680-93747207	+	3741	1.51498	1.32317e-34	338.784	1.51498	1.32317e-34	338.784	0	1	0	-	386	327	280	314	117	108	85	115	8.05047	7.9673	7.86094	7.96509	7.27339	7.23959	7.17717	7.3518	4.54108	4.08059	3.56033	4.05135	1.35952	1.28542	1.11715	1.57338
ENSMUSG00000025219	Fgf8	chr19:45736797-45742915	-	1350	1.51422	3.20889e-08	74.9364	1.51422	3.20889e-08	74.9364	0	1	0	-	39	34	39	32	9	12	4	10	4.53477	4.51285	4.55455	4.50649	4.2916	4.32109	4.25191	4.3196	1.27142	1.17573	1.3742	1.14413	0.289798	0.395783	0.145682	0.379132
ENSMUSG00000029869	Ephb6	chr6:41605481-41620509	+	3773	1.51106	1.92778e-42	417.149	1.51106	1.92778e-42	417.149	0	1	0	-	359	343	313	306	110	129	106	91	8.00704	8.01742	7.9577	7.95879	7.25657	7.347	7.29934	7.24644	4.18762	4.24395	3.94619	3.91464	1.26734	1.52235	1.38133	1.23447
ENSMUSG00000019880	Rspo3	chr10:29453108-29535867	-	2394	1.50948	1.20935e-36	359.174	1.50948	1.20935e-36	359.174	0	1	0	-	510	397	457	416	132	197	135	121	8.49803	8.34284	8.46764	8.41066	7.57538	7.81749	7.654	7.61899	9.37574	7.74158	9.08056	8.38739	2.39682	3.66397	2.7726	2.58694
ENSMUSG00000026471	Mr1	chr1:155127877-155146780	-	2509	1.50331	6.92759e-30	291.594	1.50331	6.92759e-30	291.594	0	1	0	-	296	308	254	236	92	107	67	91	7.71203	7.78585	7.65322	7.61781	7.01308	7.09292	6.9295	7.0879	5.19219	5.73077	4.81563	4.54014	1.59394	1.89886	1.31296	1.85637
ENSMUSG00000030433	Sbk2	chr7:4956133-4964390	-	2426	1.50082	3.46082e-07	64.6082	1.50082	3.46082e-07	64.6082	0	1	0	-	28	27	29	27	5	6	3	10	4.10295	4.10734	4.12662	4.11535	3.90404	3.91481	3.8909	3.96901	0.507957	0.519561	0.568627	0.537193	0.0895912	0.110121	0.0608007	0.210976
ENSMUSG00000049128	Ivl	chr3:92570911-92573715	-	1892	1.50026	3.21245e-18	174.932	1.50026	3.21245e-18	174.932	0	1	0	-	162	153	128	134	37	39	59	45	6.74581	6.74632	6.64862	6.68896	6.10756	6.12635	6.30245	6.22095	3.76837	3.77514	3.21817	3.41855	0.850093	0.917812	1.53324	1.21735
ENSMUSG00000034570	Inpp5j	chr11:3494374-3504821	-	5092	1.49972	4.44486e-15	143.521	1.49972	4.44486e-15	143.521	0	1	0	-	120	118	91	111	29	50	26	30	6.30299	6.32531	6.1972	6.31195	5.77462	5.93154	5.78094	5.82725	1.03718	1.08182	0.850107	1.05219	0.247569	0.437212	0.251052	0.301549
ENSMUSG00000057880	Abat	chr16:8513428-8621568	+	7748	1.49726	2.1895e-52	516.597	1.49726	2.1895e-52	516.597	-1.21695	0.0462388	13.3499	chr16:8572835-8572950	642	538	631	543	215	176	193	204	8.88618	8.78715	8.93426	8.8268	8.07521	7.96089	8.08155	8.14569	3.64674	3.24157	3.87401	3.38273	1.20624	1.01142	1.22475	1.34761
ENSMUSG00000054675	Tmem119	chr5:113793728-113800516	-	2315	1.49649	7.249e-171	1701.4	1.49649	7.249e-171	1701.4	0	1	0	-	4074	3870	3407	3434	1352	1331	1171	1202	11.608	11.6165	11.5075	11.5385	10.6335	10.6313	10.6098	10.6664	77.4515	78.0411	70.007	71.599	25.387	25.5998	24.8705	26.5753
ENSMUSG00000041423	Paqr6	chr3:88364583-88368541	+	2429	1.49614	2.46174e-07	66.0876	1.49614	2.46174e-07	66.0876	0	1	0	-	30	29	31	26	3	7	8	8	4.18398	4.18917	4.20832	4.17255	3.94978	3.99013	4.00952	4.01384	0.543567	0.557357	0.607092	0.516659	0.0536883	0.128316	0.161935	0.168573
ENSMUSG00000037161	Mgarp	chr3:51388414-51396738	-	2064	1.49605	3.14874e-20	195.019	1.49605	3.14874e-20	195.019	0	1	0	-	174	182	185	148	68	58	34	60	6.95496	7.02114	7.04068	6.91411	6.47839	6.42262	6.29084	6.49537	3.71022	4.11647	4.26366	3.46107	1.43214	1.25121	0.80993	1.48787
ENSMUSG00000022636	Alcam	chr16:52248995-52454074	-	7121	1.49405	1.68159e-49	487.743	1.49405	1.68159e-49	487.743	0	1	0	-	918	870	784	668	337	251	235	264	9.395	9.40032	9.32019	9.20207	8.59577	8.40365	8.42909	8.53703	5.67363	5.7035	5.23716	4.52786	2.05719	1.56943	1.62258	1.89753
ENSMUSG00000042804	Gpr153	chr4:152274231-152285337	+	3909	1.4933	4.27355e-50	493.692	1.4933	4.27355e-50	493.692	0	1	0	-	935	996	930	749	272	370	304	267	9.47673	9.58724	9.53778	9.36777	8.52306	8.74544	8.6785	8.61942	10.527	11.8948	11.3172	9.24856	3.02475	4.2145	3.82372	3.49599
ENSMUSG00000038193	Hand2	chr8:57320982-57324517	+	2235	1.48936	1.487e-50	498.277	1.48936	1.487e-50	498.277	0	1	0	-	527	546	482	454	174	209	156	140	8.61659	8.6959	8.6033	8.57401	7.83214	7.95357	7.8381	7.80187	10.3775	11.4046	10.2586	9.80474	3.38421	4.1637	3.43183	3.20609
ENSMUSG00000030688	Stard10	chr7:101317085-101346626	+	2383	1.48797	4.47846e-72	713.489	1.48797	4.47846e-72	713.489	0	1	0	-	1429	1338	1068	1100	441	435	397	403	10.0443	10.0387	9.84576	9.89437	9.07214	9.07173	9.08014	9.12356	26.3917	26.2117	21.319	22.2806	8.04453	8.12784	8.19115	8.65577
ENSMUSG00000078566	Bnip3	chr7:138890835-138909519	-	2265	1.48727	4.29264e-33	323.673	1.48727	4.29264e-33	323.673	0	1	0	-	369	342	416	287	133	131	111	96	8.07882	8.06577	8.23189	7.96156	7.40912	7.40823	7.37666	7.32646	7.16998	7.0489	8.73666	6.11606	2.55252	2.57521	2.40953	2.16934
ENSMUSG00000054263	Lifr	chr15:7129558-7197489	+	10330	1.48499	2.04296e-77	766.897	1.48499	2.04296e-77	766.897	-1.23078	5.17728e-05	42.859	chr15:7154352-7154547	1007	896	996	803	329	346	308	282	9.56334	9.51237	9.61984	9.44928	8.67578	8.72049	8.71124	8.68073	4.29031	4.04922	4.58648	3.75209	1.38446	1.49137	1.46598	1.39725
ENSMUSG00000029641	Rasl11a	chr5:146845070-146847726	+	1126	1.48259	1.72533e-86	857.631	1.48259	1.72533e-86	857.631	0	1	0	-	4073	3575	3268	3328	1197	1508	1150	1036	11.5887	11.5209	11.4484	11.4891	10.5114	10.7115	10.5714	10.5223	159.197	148.218	138.059	142.66	46.2106	59.6311	50.2155	47.0919
ENSMUSG00000087290	Gm15866	chr5:43557284-43601730	-	913	1.47765	5.95566e-06	52.2507	1.47765	5.95566e-06	52.2507	0	1	0	-	11	14	13	11	1	2	1	0	2.70942	2.74306	2.73535	2.71882	2.61433	2.62484	2.61692	2.60642	0.530251	0.715847	0.677319	0.58154	0.0476119	0.097537	0.0538527	0
ENSMUSG00000027068	Dhrs9	chr2:69380444-69404533	+	4281	1.47656	9.56477e-20	190.193	1.47656	9.56477e-20	190.193	0	1	0	-	179	125	173	154	52	53	57	42	6.89919	6.71908	6.92312	6.86453	6.30453	6.31599	6.38236	6.29234	1.84021	1.3631	1.9223	1.73633	0.528012	0.55124	0.654648	0.502144
ENSMUSG00000020388	Pdlim4	chr11:54054927-54069014	-	2560	1.47625	9.95863e-56	550.018	1.47625	9.95863e-56	550.018	0	1	0	-	1244	1154	961	886	411	387	301	349	9.83159	9.81753	9.66439	9.61386	8.922	8.88779	8.7838	8.91938	21.3865	21.044	17.8568	16.7052	6.97891	6.73102	5.78103	6.97766
ENSMUSG00000032348	Gsta4	chr9:78191965-78209348	+	957	1.47519	3.75215e-65	644.257	1.47519	3.75215e-65	644.257	0	1	0	-	1640	1370	1194	1265	519	501	387	466	10.23	10.1183	10.0053	10.0802	9.26076	9.24404	9.13034	9.29978	75.4209	66.8301	59.3489	63.8023	23.5744	23.3097	19.8828	24.9229
ENSMUSG00000039481	Nrtn	chr17:56751324-56757530	-	1023	1.47469	3.05e-07	65.157	1.47469	3.05e-07	65.157	0	1	0	-	34	44	22	28	7	10	7	6	4.33642	4.42541	4.25565	4.31163	4.11045	4.14034	4.12102	4.11438	1.46273	2.00789	1.02298	1.32111	0.297446	0.435246	0.336435	0.300193
ENSMUSG00000040998	Npnt	chr3:132881744-132950291	-	5026	1.47156	1.41333e-115	1148.5	1.47156	1.41333e-115	1148.5	-1.09036	7.65397e-33	321.161	chr3:132914368-132914464	3235	2886	2872	2929	1005	1175	1080	879	11.2829	11.2313	11.2399	11.2821	10.2675	10.4037	10.4178	10.2868	28.3277	26.8063	27.1821	28.129	8.6922	10.4094	10.5652	8.9514
ENSMUSG00000024885	Aldh3b1	chr19:3913492-3929761	-	1875	1.46599	4.63148e-28	273.343	1.46599	4.63148e-28	273.343	0	1	0	-	239	242	197	211	89	74	63	72	7.4011	7.45113	7.31863	7.38138	6.83612	6.76109	6.74072	6.81602	5.60991	6.02528	4.99788	5.43174	2.06336	1.75728	1.65203	1.96542
ENSMUSG00000019929	Dcn	chr10:97479499-97518162	+	2084	1.46193	1.89496e-73	727.224	1.46193	1.89496e-73	727.224	0	1	0	-	15306	14709	14461	12680	4697	6370	4551	4274	13.5424	13.5625	13.5596	13.4552	12.4798	12.7517	12.5488	12.5322	323.239	329.495	330.081	293.683	97.9736	136.098	107.371	104.969
ENSMUSG00000060224	Pyroxd2	chr19:42725857-42752775	-	3119	1.45609	3.6131e-14	134.421	1.45609	3.6131e-14	134.421	0	1	0	-	128	104	84	91	27	33	37	31	6.26962	6.18898	6.09028	6.14013	5.69127	5.74156	5.80275	5.76727	1.80615	1.55661	1.2811	1.40826	0.3763	0.471095	0.583263	0.508711
ENSMUSG00000040557	Wbscr27	chr5:134932367-134942637	+	3342	1.45182	1.09895e-30	299.59	1.45182	1.09895e-30	299.59	0	1	0	-	254	262	225	223	91	80	74	83	7.51614	7.5805	7.48193	7.4924	6.92121	6.86958	6.88336	6.95611	3.34493	3.65981	3.20255	3.22074	1.18364	1.06584	1.08869	1.27115
ENSMUSG00000060212	Pcnxl2	chr8:125751508-125898293	-	7773	1.45007	1.52238e-08	78.1748	1.45007	1.52238e-08	78.1748	0	1	0	-	41	54	40	48	14	19	10	8	4.87558	4.98353	4.8892	4.95479	4.66391	4.71009	4.64188	4.62668	0.232143	0.324316	0.244789	0.298065	0.0782934	0.108837	0.0632542	0.0526776
ENSMUSG00000028943	Espn	chr4:152120330-152152371	-	5979	1.44762	1.97859e-25	247.036	1.44762	1.97859e-25	247.036	0	1	0	-	217	183	188	191	63	74	56	70	7.22726	7.15309	7.1796	7.20588	6.58097	6.65096	6.58421	6.69276	1.59732	1.42885	1.49572	1.54192	0.458034	0.551078	0.460509	0.599231
ENSMUSG00000021136	Smoc1	chr12:81026807-81186414	+	3496	1.44619	6.50202e-10	91.8695	1.44619	6.50202e-10	91.8695	0	1	0	-	52	57	52	49	17	17	14	14	5.13467	5.18768	5.15913	5.14646	4.87512	4.87736	4.86681	4.87395	0.654623	0.761144	0.707542	0.676523	0.21138	0.216515	0.196895	0.204966
ENSMUSG00000039787	Cercam	chr2:29869163-29882840	+	3383	1.4454	1.18522e-51	509.262	1.4454	1.18522e-51	509.262	0	1	0	-	630	722	641	556	238	215	213	222	8.93161	9.10049	9.00904	8.90868	8.20891	8.15233	8.21321	8.26951	8.19593	9.96319	9.01315	7.93287	3.05817	2.82974	3.09568	3.35873
ENSMUSG00000032717	Mdfi	chr17:47815327-47834691	-	3092	1.43615	6.18843e-40	392.084	1.43615	6.18843e-40	392.084	0	1	0	-	407	424	360	327	137	133	128	130	8.22252	8.30262	8.18341	8.12775	7.49758	7.48882	7.52611	7.56008	5.79315	6.40162	5.53839	5.10465	1.92605	1.91524	2.0354	2.15193
ENSMUSG00000024186	Rgs11	chr17:26202950-26211324	+	4206	1.43471	4.94905e-11	103.055	1.43471	4.94905e-11	103.055	0	1	0	-	67	73	63	75	21	28	24	13	5.55583	5.61528	5.55966	5.64306	5.23657	5.29684	5.28752	5.19362	0.701076	0.810246	0.712511	0.860696	0.217038	0.296414	0.280556	0.158197
ENSMUSG00000009731	Kcnd1	chrX:7822288-7838280	+	5287	1.43443	3.54853e-36	354.5	1.43443	3.54853e-36	354.5	0	1	0	-	319	320	285	279	120	118	88	93	7.86193	7.90889	7.83211	7.83416	7.24462	7.2429	7.15078	7.19959	2.65547	2.82556	2.56422	2.54714	0.986638	0.993763	0.818374	0.900323
ENSMUSG00000035506	Slc12a8	chr16:33517327-33664135	+	4444	1.43272	1.09564e-15	149.603	1.43272	1.09564e-15	149.603	0	1	0	-	105	118	122	111	41	44	26	39	6.295	6.38739	6.41329	6.37418	5.92832	5.95379	5.84556	5.96497	1.03986	1.23957	1.30589	1.20561	0.401048	0.440848	0.287659	0.449175
ENSMUSG00000029716	Tfr2	chr5:137569850-137587481	+	2926	1.4314	1.19678e-05	49.2199	1.4314	1.19678e-05	49.2199	0	1	0	-	12	17	13	9	1	2	2	0	2.79062	2.84131	2.80725	2.77179	2.68856	2.69884	2.70193	2.68089	0.180496	0.27123	0.211344	0.148466	0.0148563	0.0304345	0.0336073	0
ENSMUSG00000092283	Gm20412	chr2:158117153-158117905	+	633	1.42996	2.14003e-56	556.696	1.42996	2.14003e-56	556.696	0	1	0	-	2257	2165	1845	1719	811	731	553	725	10.738	10.7555	10.6181	10.5751	9.85269	9.78094	9.64615	9.88958	156.923	159.668	138.648	131.078	55.6933	51.419	42.9536	58.6218
ENSMUSG00000089669	Tnfsf13	chr11:69682845-69685784	-	1637	1.42965	1.149e-21	209.397	1.42965	1.149e-21	209.397	0	1	0	-	189	173	164	170	73	70	41	53	7.03714	7.01785	6.99261	7.03051	6.53888	6.52719	6.37694	6.47962	5.08127	4.93356	4.76558	5.01254	1.93847	1.90397	1.23144	1.65711
ENSMUSG00000028573	Fggy	chr4:95557506-95926939	+	5844	1.42804	5.90721e-19	182.286	1.42804	5.90721e-19	182.286	0	1	0	-	153	151	153	144	57	64	51	31	6.7707	6.79793	6.81418	6.7917	6.30573	6.35441	6.31016	6.17396	1.15223	1.20623	1.24538	1.18935	0.423985	0.487618	0.42908	0.271504
ENSMUSG00000040093	Bmf	chr2:118528756-118549687	-	5253	1.41969	1.38186e-44	438.595	1.41969	1.38186e-44	438.595	0	1	0	-	544	494	464	459	167	179	151	195	8.64059	8.60986	8.56968	8.58062	7.80645	7.8556	7.81753	8.00235	4.55776	4.39018	4.20176	4.21758	1.38196	1.51725	1.41334	1.89999
ENSMUSG00000042684	Npl	chr1:153503015-153549714	-	1403	1.41668	1.10741e-14	139.557	1.41668	1.10741e-14	139.557	0	1	0	-	168	149	168	113	43	75	43	37	6.81153	6.77357	6.85648	6.63596	6.1949	6.40204	6.23502	6.20431	5.27001	4.95783	5.69603	3.88757	1.33228	2.3802	1.50692	1.3498
ENSMUSG00000075590	Nrbp2	chr15:76085594-76090013	-	2495	1.41505	2.07467e-52	516.831	1.41505	2.07467e-52	516.831	0	1	0	-	556	544	539	473	183	192	181	196	8.71135	8.74285	8.74666	8.6583	7.91847	7.95581	7.9841	8.06268	9.80762	10.1787	10.2763	9.15057	3.18835	3.42642	3.56686	4.02078
ENSMUSG00000028108	Ecm1	chr3:95734146-95739569	-	2521	1.41492	1.93863e-84	837.125	1.41492	1.93863e-84	837.125	0	1	0	-	4703	4829	3826	3921	1542	1629	1460	1568	11.8332	11.9173	11.7065	11.7533	10.8483	10.904	10.8972	10.9927	82.1035	89.4227	72.1926	75.0726	26.5887	28.7712	28.4746	31.8345
ENSMUSG00000052957	Gas1	chr13:60174404-60177365	-	2961	1.41404	1.07956e-94	939.668	1.41404	1.07956e-94	939.668	0	1	0	-	17140	16651	15688	15684	6052	6628	4816	6018	13.7238	13.7545	13.7099	13.7336	12.7831	12.8721	12.6866	12.9133	254.76	262.522	252.029	255.668	88.8478	99.6677	79.9699	104.025
ENSMUSG00000028039	Efna3	chr3:89313898-89322965	-	2434	1.41398	1.47341e-15	148.317	1.41398	1.47341e-15	148.317	0	1	0	-	131	112	104	103	36	45	42	27	6.40226	6.34802	6.31599	6.32329	5.88142	5.9501	5.96264	5.85546	2.3687	2.14813	2.03251	2.04256	0.642936	0.823194	0.848413	0.567764
ENSMUSG00000039062	Anpep	chr7:79821802-79848210	-	3879	1.41295	1.80288e-27	267.44	1.41295	1.80288e-27	267.44	0	1	0	-	254	246	243	201	83	102	76	69	7.50507	7.52406	7.525	7.41	6.86858	6.97138	6.8839	6.86248	2.88186	2.96059	2.97994	2.50112	0.930131	1.17082	0.963324	0.910445
ENSMUSG00000054555	Adam12	chr7:133883198-134232146	-	8273	1.41228	4.24044e-53	523.726	1.41228	4.24044e-53	523.726	-1.56496	1.02116e-19	189.909	chr7:134012272-134012352	1041	1060	1116	914	356	394	422	305	9.66809	9.73822	9.79765	9.6396	8.8175	8.89929	9.02611	8.82221	5.53793	5.98144	6.41685	5.33262	1.87057	2.12052	2.508	1.88695
ENSMUSG00000038775	Vill	chr9:119052777-119071525	+	4409	1.41199	2.53178e-18	175.966	1.41199	2.53178e-18	175.966	0	1	0	-	239	260	188	230	92	71	52	96	7.42759	7.52929	7.31424	7.46815	6.87804	6.77057	6.69579	6.9789	2.38571	2.75294	2.02833	2.51794	0.907055	0.717015	0.579885	1.11444
ENSMUSG00000005800	Mmp8	chr9:7558428-7568486	+	2453	1.41157	2.36931e-06	56.2538	1.41157	2.36931e-06	56.2538	0	1	0	-	26	26	29	22	4	11	4	5	4.00639	4.01823	4.04565	3.99157	3.81391	3.88207	3.82121	3.83508	0.466482	0.494811	0.562368	0.432895	0.070884	0.199667	0.0801753	0.104327
ENSMUSG00000055862	Izumo4	chr10:80702692-80705382	+	938	1.40692	1.31717e-14	138.804	1.40692	1.31717e-14	138.804	0	1	0	-	116	100	94	91	30	34	33	36	6.22259	6.17544	6.15113	6.14678	5.72237	5.75664	5.77845	5.8158	5.4427	4.97692	4.767	4.6827	1.39029	1.61394	1.72977	1.96437
ENSMUSG00000053113	Socs3	chr11:117966078-117970047	-	2891	1.40559	5.68819e-86	852.45	1.40559	5.68819e-86	852.45	0	1	0	-	1268	1256	1088	1095	449	431	395	429	9.9249	9.97102	9.85301	9.88082	9.07541	9.05501	9.06646	9.16034	19.3033	20.2817	17.902	18.282	6.75125	6.63803	6.7178	7.59511
ENSMUSG00000042501	Cpa6	chr1:10324719-10719945	-	6840	1.39744	1.21197e-05	49.1651	1.39744	1.21197e-05	49.1651	0	1	0	-	14	19	19	19	2	6	3	2	3.36776	3.41992	3.42205	3.42584	3.25588	3.29622	3.27119	3.26202	0.0900806	0.129676	0.132135	0.134077	0.0127104	0.0390576	0.0215647	0.0149658
ENSMUSG00000019989	Enpp3	chr10:24773813-24836195	-	2815	1.39537	1.22791e-10	99.1083	1.39537	1.22791e-10	99.1083	0	1	0	-	85	72	76	67	20	38	22	16	5.74746	5.69945	5.72883	5.68457	5.31807	5.46354	5.3603	5.31381	1.32892	1.19404	1.28427	1.14883	0.308843	0.601057	0.384258	0.290915
ENSMUSG00000029001	Fbxo44	chr4:148152799-148160482	-	3024	1.38817	1.70639e-20	197.679	1.38817	1.70639e-20	197.679	0	1	0	-	229	196	156	187	58	80	65	65	7.25954	7.19374	7.05641	7.18734	6.54618	6.68025	6.63796	6.65708	3.33283	3.02578	2.45394	2.98482	0.833743	1.17793	1.05684	1.10016
ENSMUSG00000020620	Abca8b	chr11:109932189-109995845	-	7423	1.3873	1.60298e-07	67.9507	1.3873	1.60298e-07	67.9507	0	1	0	-	79	46	49	42	7	21	21	12	5.2913	5.1155	5.14027	5.09874	4.79687	4.91918	4.93871	4.86331	0.46839	0.289295	0.314005	0.273104	0.0409925	0.125965	0.139097	0.0827421
ENSMUSG00000053613	4732444A12Rik	chr11:120659156-120661815	+	2659	1.38083	1.93996e-05	47.1221	1.38083	1.93996e-05	47.1221	0	1	0	-	9	18	11	6	0	0	2	0	2.48586	2.57419	2.51119	2.46335	2.39831	2.39847	2.42208	2.40034	0.148965	0.316022	0.196786	0.108916	0	0	0.036982	0
ENSMUSG00000019359	Gdpd2	chrX:100729872-100738895	+	4609	1.37879	6.78769e-08	71.6828	1.37879	6.78769e-08	71.6828	0	1	0	-	44	52	72	41	21	11	18	12	5.0693	5.14333	5.276	5.07692	4.89696	4.81021	4.89215	4.84117	0.420151	0.526696	0.743098	0.429373	0.198061	0.106266	0.192019	0.13326
ENSMUSG00000027408	Cpxm1	chr2:130390774-130397574	-	2432	1.37686	5.49529e-74	732.6	1.37686	5.49529e-74	732.6	0	1	0	-	2538	2374	2198	2088	1008	822	714	852	10.9336	10.9272	10.8677	10.8425	10.1281	9.97513	9.94492	10.1197	45.9291	45.5701	42.9917	41.4405	18.017	15.0494	14.4349	17.9308
ENSMUSG00000038292	Ccdc155	chr7:45183623-45204892	-	2365	1.37682	1.52459e-07	68.1685	1.37682	1.52459e-07	68.1685	0	1	0	-	58	45	46	31	9	18	16	9	4.97604	4.90847	4.91983	4.81271	4.60508	4.68852	4.68757	4.6243	1.07934	0.888269	0.925225	0.632686	0.165424	0.338884	0.332634	0.194776
ENSMUSG00000001510	Dlx3	chr11:95120088-95125296	+	2637	1.37123	1.62619e-15	147.888	1.37123	1.62619e-15	147.888	0	1	0	-	177	173	139	109	53	61	54	39	6.85975	6.88203	6.756	6.63285	6.28016	6.33592	6.33079	6.23819	2.95408	3.06266	2.50741	1.99514	0.873679	1.02998	1.00684	0.756971
ENSMUSG00000049115	Agtr1a	chr13:30336440-30382867	+	2467	1.3705	1.84682e-11	107.336	1.3705	1.84682e-11	107.336	0	1	0	-	79	80	94	68	35	26	22	24	5.80435	5.83567	5.91834	5.78082	5.52788	5.46132	5.45139	5.47955	1.40935	1.51385	1.8125	1.33045	0.616716	0.469261	0.438462	0.497928
ENSMUSG00000028640	Tfap2c	chr2:172549592-172558622	+	3679	1.37035	2.00993e-05	46.9682	1.37035	2.00993e-05	46.9682	0	1	0	-	10	8	9	9	0	0	0	1	2.20816	2.19418	2.20478	2.20669	2.11378	2.11391	2.11491	2.12666	0.119627	0.101513	0.116368	0.118078	0	0	0	0.0139122
ENSMUSG00000025375	Aatk	chr11:120007312-120047167	-	7159	1.37031	4.81868e-09	83.1707	1.37031	4.81868e-09	83.1707	0	1	0	-	60	69	65	62	10	22	22	26	5.43105	5.50911	5.48993	5.48025	5.05664	5.16522	5.187	5.23261	0.368857	0.449946	0.431898	0.41802	0.0607203	0.13683	0.151095	0.185886
ENSMUSG00000025355	Mmp19	chr10:128790952-128800824	+	3410	1.36835	1.33555e-68	678.743	1.36835	1.33555e-68	678.743	0	1	0	-	813	860	823	722	310	319	284	282	9.3128	9.41485	9.38813	9.2948	8.56683	8.5959	8.58692	8.61274	10.4929	11.7735	11.4806	10.2198	3.95179	4.1653	4.09489	4.23272
ENSMUSG00000079481	Nhsl2	chrX:101849384-102092055	+	16952	1.36126	1.26167e-10	98.9905	1.36126	1.26167e-10	98.9905	0	1	0	-	75	68	74	73	23	25	32	16	5.67298	5.65611	5.6977	5.70194	5.32478	5.34411	5.42683	5.29531	0.194715	0.187263	0.20765	0.207855	0.0589784	0.0656643	0.0928127	0.0483085
ENSMUSG00000080942	Gm14556	chrX:38180727-38181626	+	899	1.35865	3.3688e-05	44.7252	1.35865	3.3688e-05	44.7252	0	1	0	-	14	17	8	19	2	4	2	0	3.03126	3.06472	2.98347	3.08761	2.92165	2.94175	2.9254	2.90449	0.685374	0.88278	0.423302	1.02012	0.0967066	0.198112	0.109383	0
ENSMUSG00000035547	Capn5	chr7:98121558-98178274	-	5485	1.35857	2.85469e-26	255.444	1.35857	2.85469e-26	255.444	0	1	0	-	289	265	244	214	113	89	78	88	7.66582	7.64546	7.59594	7.52111	7.08675	6.97734	6.96709	7.04424	2.31889	2.25545	2.11609	1.88319	0.895546	0.722476	0.699192	0.821165
ENSMUSG00000038390	Gpr162	chr6:124858443-124863917	-	2676	1.35335	5.79867e-12	112.367	1.35335	5.79867e-12	112.367	0	1	0	-	99	80	79	85	33	31	34	19	5.98655	5.91319	5.91357	5.95838	5.59067	5.57886	5.63079	5.51254	1.6282	1.39562	1.40431	1.53317	0.536061	0.515805	0.624699	0.363406
ENSMUSG00000041577	Prelp	chr1:133910303-133921414	-	3615	1.35189	2.93232e-05	45.3279	1.35189	2.93232e-05	45.3279	0	1	0	-	25	13	13	17	2	5	1	4	3.38241	3.28802	3.28964	3.3299	3.17813	3.20867	3.17136	3.20648	0.304363	0.16788	0.171063	0.226986	0.0240496	0.0615846	0.013601	0.0566339
ENSMUSG00000001741	Il16	chr7:83642847-83745726	-	7842	1.34979	1.95409e-08	77.0906	1.34979	1.95409e-08	77.0906	0	1	0	-	75	76	40	76	20	18	28	18	5.55839	5.58886	5.35736	5.60496	5.18318	5.16848	5.27708	5.19706	0.420915	0.452428	0.242635	0.467783	0.110864	0.102201	0.175554	0.117482
ENSMUSG00000041798	Gck	chr11:5900819-5950081	-	3033	1.34972	3.64794e-06	54.3795	1.34972	3.64794e-06	54.3795	0	1	0	-	26	30	30	21	8	6	8	6	4.09166	4.13597	4.13905	4.06824	3.93814	3.92002	3.94888	3.93177	0.377277	0.461755	0.470511	0.334199	0.114658	0.0880824	0.129687	0.101252
ENSMUSG00000040957	Cables1	chr18:11839219-11945627	+	3397	1.3479	1.39526e-29	288.553	1.3479	1.39526e-29	288.553	0	1	0	-	286	294	284	244	111	94	98	105	7.73658	7.80035	7.78478	7.69197	7.15915	7.08489	7.15695	7.21522	3.70536	4.04031	3.97689	3.46699	1.42041	1.23209	1.41843	1.58204
ENSMUSG00000035258	Abi3bp	chr16:56477845-56690128	+	4735	1.34694	1.37912e-14	138.604	1.34694	1.37912e-14	138.604	0	1	0	-	113	99	126	107	45	44	35	33	6.33174	6.29377	6.42989	6.35318	5.95663	5.95402	5.91988	5.91718	1.05031	0.976064	1.26582	1.09074	0.413122	0.413755	0.363435	0.356713
ENSMUSG00000034463	Scara3	chr14:65919394-65953744	-	3405	1.34352	6.464e-42	411.895	1.34352	6.464e-42	411.895	0	1	0	-	477	459	442	386	159	190	167	144	8.47592	8.49294	8.47342	8.38436	7.71802	7.83251	7.8172	7.75592	6.16539	6.29302	6.17484	5.47177	2.02986	2.48454	2.41145	2.16456
ENSMUSG00000020173	Cobl	chr11:12236607-12464960	-	8142	1.34236	7.06634e-13	121.508	1.34236	7.06634e-13	121.508	0	1	0	-	1192	1006	1015	1064	297	479	446	268	9.79989	9.70049	9.72095	9.7857	8.70401	9.05472	9.07806	8.74428	6.44325	5.76806	5.93001	6.30766	1.58566	2.61948	2.69328	1.68472
ENSMUSG00000017692	Rhbdl3	chr11:80300911-80355955	+	4734	1.34154	5.14528e-10	92.8859	1.34154	5.14528e-10	92.8859	0	1	0	-	77	89	76	70	17	33	34	20	5.76392	5.85612	5.78935	5.76372	5.3531	5.48664	5.52278	5.41304	0.71585	0.877657	0.76367	0.713719	0.156101	0.310382	0.353125	0.216235
ENSMUSG00000026043	Col3a1	chr1:45311537-45349706	+	8378	1.33967	3.43871e-74	734.636	1.33967	3.43871e-74	734.636	0	1	0	-	89199	82866	81301	75708	30690	39467	29123	26022	16.1021	16.089	16.084	16.0383	15.1316	15.3628	15.1843	15.1245	468.575	461.742	461.611	436.173	159.236	209.751	170.913	158.974
ENSMUSG00000055653	Gpc3	chrX:52272425-52613950	-	2690	1.33959	2.29869e-77	766.385	1.33959	2.29869e-77	766.385	0	1	0	-	7337	6896	6442	6263	2458	3087	2593	2105	12.4902	12.4885	12.4362	12.4326	11.515	11.7191	11.656	11.517	120.04	119.676	113.917	112.38	39.7206	51.0969	47.3946	40.052
ENSMUSG00000040562	Gstm2	chr3:107981701-107986453	-	1679	1.33796	4.4767e-47	463.49	1.33796	4.4767e-47	463.49	0	1	0	-	700	638	525	579	235	263	211	211	9.014	8.98545	8.83301	8.93521	8.19364	8.27699	8.20003	8.22893	18.3488	17.7392	14.874	16.6451	6.0842	6.97453	6.17888	6.43215
ENSMUSG00000020432	Tcn2	chr11:3917191-3932159	-	2178	1.33639	4.26345e-48	473.702	1.33639	4.26345e-48	473.702	0	1	0	-	1415	1411	1175	1101	447	470	514	483	10.0784	10.1311	9.97618	9.93958	9.13427	9.18068	9.32578	9.31147	28.5929	30.2435	25.6626	24.3999	8.92145	9.60838	11.6034	11.3505
ENSMUSG00000034818	Celf5	chr10:81459226-81482709	-	6668	1.33552	4.16842e-07	63.8003	1.33552	4.16842e-07	63.8003	0	1	0	-	38	43	34	32	12	11	12	9	4.61913	4.67159	4.6081	4.59837	4.41197	4.40441	4.42703	4.40217	0.250812	0.301048	0.242551	0.231639	0.0782297	0.0734526	0.0884838	0.0690831
ENSMUSG00000025213	Kazald1	chr19:45075240-45079289	+	1681	1.33508	1.2767e-07	68.9391	1.33508	1.2767e-07	68.9391	0	1	0	-	61	44	47	39	12	21	9	17	5.08953	4.9964	5.02199	4.9708	4.72838	4.80964	4.71476	4.80043	1.59706	1.22194	1.33	1.11984	0.310313	0.556239	0.263241	0.517614
ENSMUSG00000038576	Susd4	chr1:182763859-182896598	+	3527	1.3344	2.47238e-15	146.069	1.3344	2.47238e-15	146.069	0	1	0	-	155	188	123	159	58	68	42	56	6.83327	6.99105	6.74139	6.90747	6.36856	6.43471	6.30291	6.41867	1.93413	2.48837	1.6589	2.17595	0.71484	0.858447	0.585494	0.812657
ENSMUSG00000089675	Ugt1a8	chr1:88087812-88219004	+	2227	1.33198	9.56931e-52	510.191	1.33198	9.56931e-52	510.191	0	1	0	-	2064	1643	1580	1678	602	777	693	565	10.599	10.4419	10.4187	10.497	9.5567	9.76552	9.75526	9.6296	40.7896	34.4414	33.7487	36.3688	11.7507	15.535	15.3	12.9853
ENSMUSG00000085890	2010012P19Rik	chr11:69682137-69691141	+	1109	1.33046	1.0402e-07	69.8288	1.33046	1.0402e-07	69.8288	0	1	0	-	56	41	42	50	19	9	14	17	5.05499	4.9715	4.98287	5.04767	4.78713	4.69912	4.7611	4.79732	2.22237	1.7259	1.80152	2.17619	0.744746	0.361344	0.62069	0.784589
ENSMUSG00000089960	Ugt1a1	chr1:88211958-88218997	+	2224	1.33009	4.79457e-52	513.193	1.33009	4.79457e-52	513.193	0	1	0	-	2055	1637	1575	1674	602	775	691	564	10.5934	10.4371	10.4143	10.4934	9.55499	9.76181	9.75131	9.62655	40.6665	34.3619	33.6873	36.3311	11.7665	15.5159	15.2764	12.9798
ENSMUSG00000028167	Bdh2	chr3:135281220-135304426	+	1202	1.32981	1.01604e-19	189.931	1.32981	1.01604e-19	189.931	0	1	0	-	174	158	154	149	62	69	56	46	6.92901	6.90542	6.89799	6.89238	6.41941	6.46665	6.42741	6.37462	6.37095	6.13643	6.09448	5.98328	2.24219	2.55596	2.29067	1.95875
ENSMUSG00000090165	Ugt1a10	chr1:88055387-88219004	+	2267	1.3297	4.98763e-52	513.021	1.3297	4.98763e-52	513.021	0	1	0	-	2054	1637	1574	1674	602	775	691	564	10.5929	10.437	10.4137	10.4933	9.5549	9.76172	9.75122	9.62646	39.8757	33.7101	33.0273	35.642	11.5433	15.2216	14.9867	12.7336
ENSMUSG00000089943	Ugt1a5	chr1:88166011-88218997	+	2203	1.3297	4.98763e-52	513.021	1.3297	4.98763e-52	513.021	0	1	0	-	2054	1637	1574	1674	602	775	691	564	10.5929	10.437	10.4137	10.4933	9.5549	9.76172	9.75122	9.62646	41.0342	34.6894	33.9868	36.6774	11.8787	15.6638	15.422	13.1036
ENSMUSG00000090175	Ugt1a9	chr1:88070799-88218997	+	2190	1.32961	1.02156e-51	509.907	1.32961	1.02156e-51	509.907	0	1	0	-	2056	1642	1574	1675	602	778	691	564	10.5944	10.4404	10.4143	10.4944	9.55559	9.76548	9.75188	9.62714	41.3179	35.0019	34.1886	36.9172	11.9492	15.8178	15.5136	13.1813
ENSMUSG00000090171	Ugt1a2	chr1:88200600-88218997	+	2211	1.32933	7.0011e-52	511.548	1.32933	7.0011e-52	511.548	0	1	0	-	2054	1637	1574	1675	602	776	691	564	10.593	10.4371	10.4138	10.494	9.55505	9.7629	9.75136	9.6266	40.8857	34.5639	33.8639	36.5665	11.8357	15.6273	15.3662	13.0561
ENSMUSG00000044349	Snhg11	chr2:158375637-158386145	+	8521	1.3283	1.83017e-06	57.3751	1.3283	1.83017e-06	57.3751	0	1	0	-	40	36	54	31	5	17	15	9	4.72284	4.70936	4.84228	4.67969	4.43365	4.54689	4.54473	4.49067	0.206599	0.197231	0.301456	0.175602	0.0255074	0.0888318	0.0865524	0.0540601
ENSMUSG00000097993	Ptprv	chr1:135108496-135132594	-	6987	1.32818	7.21593e-12	111.417	1.32818	7.21593e-12	111.417	-1.21415	1	0	chr1:135123952-135124192	173	165	154	158	64	54	28	80	6.92508	6.932	6.89754	6.92817	6.42874	6.3713	6.21668	6.59434	1.08972	1.10244	1.04846	1.0915	0.398176	0.344123	0.197036	0.586035
ENSMUSG00000037820	Tgm2	chr2:158116401-158146436	-	4608	1.32754	1.22196e-23	229.129	1.32754	1.22196e-23	229.129	-1.09255	7.57185e-36	351.208	chr2:158146288-158146432	8705	8005	7163	6902	3230	3045	2067	3062	12.7129	12.6899	12.5956	12.5835	11.8147	11.7754	11.539	11.9041	83.1411	81.0984	73.944	72.297	30.4703	29.4229	22.055	34.0108
ENSMUSG00000090145	Ugt1a6b	chr1:88103251-88219003	+	2382	1.32551	1.58258e-52	518.006	1.32551	1.58258e-52	518.006	0	1	0	-	2103	1674	1605	1699	621	795	703	576	10.6265	10.4693	10.4433	10.5186	9.59223	9.79545	9.77829	9.65633	38.8559	32.8078	32.0519	34.4278	11.3328	14.8606	14.5108	12.3767
ENSMUSG00000010307	Tmem86a	chr7:47050639-47054776	+	1791	1.31765	8.91445e-32	310.499	1.31765	8.91445e-32	310.499	0	1	0	-	480	435	394	369	169	139	147	177	8.44836	8.41658	8.34842	8.31587	7.71847	7.61489	7.70624	7.84588	11.7952	11.3385	10.4646	9.94463	4.10183	3.45565	4.03553	5.05827
ENSMUSG00000073633	Fbxo36	chr1:84839840-84900487	+	2148	1.31669	6.19833e-21	202.077	1.31669	6.19833e-21	202.077	0	1	0	-	192	179	184	166	81	61	59	67	7.10993	7.10253	7.12915	7.07832	6.64881	6.53927	6.56864	6.63849	3.93393	3.89029	4.07478	3.7302	1.63922	1.26446	1.3505	1.59649
ENSMUSG00000046688	Tifa	chr3:127789871-127832135	+	2527	1.31605	1.00594e-10	99.9743	1.31605	1.00594e-10	99.9743	0	1	0	-	91	127	90	89	51	36	25	27	6.10015	6.30305	6.12924	6.1353	5.87231	5.77107	5.71128	5.74009	1.58488	2.34618	1.69417	1.69997	0.877306	0.634319	0.486422	0.546869
ENSMUSG00000006241	Ccdc159	chr9:21927470-21935872	+	1545	1.31422	1.16307e-14	139.344	1.31422	1.16307e-14	139.344	0	1	0	-	120	112	99	113	45	41	37	38	6.37252	6.36667	6.30957	6.39137	5.96616	5.94242	5.94513	5.96691	3.41832	3.38417	3.04809	3.53027	1.26611	1.18159	1.17747	1.25887
ENSMUSG00000004267	Eno2	chr6:124760052-124769673	-	4705	1.3142	8.72157e-50	490.594	1.3142	8.72157e-50	490.594	0	1	0	-	1439	1519	1293	1156	467	593	523	488	10.1305	10.2359	10.1002	10.0208	9.20963	9.39952	9.3812	9.3616	13.4605	15.0717	13.0725	11.8592	4.31463	5.61184	5.46538	5.30866
ENSMUSG00000052248	Gm13476	chr2:45111137-45114087	+	1388	1.31367	4.35784e-08	73.6073	1.31367	4.35784e-08	73.6073	0	1	0	-	65	41	60	50	13	19	18	20	5.27751	5.13856	5.27352	5.21498	4.90114	4.95628	4.96636	4.99346	2.06103	1.37898	2.05628	1.73875	0.407136	0.609501	0.637619	0.737505
ENSMUSG00000097698	Gm26906	chr12:109568627-109571723	-	1228	1.30972	8.60529e-31	300.652	1.30972	8.60529e-31	300.652	-1.08403	1	0	chr12:109568624-109569432	765	711	589	500	241	283	253	197	9.12129	9.10935	8.95969	8.8438	8.24326	8.35986	8.35362	8.21842	27.4172	27.0293	22.8159	19.653	8.53109	10.2612	10.1298	8.21093
ENSMUSG00000030543	Mesp2	chr7:79810726-79813431	+	1936	1.30826	4.58067e-06	53.3907	1.30826	4.58067e-06	53.3907	0	1	0	-	24	32	31	29	11	9	8	5	4.20303	4.27927	4.2746	4.26396	4.09353	4.07629	4.07665	4.04885	0.545589	0.771628	0.761688	0.72302	0.246987	0.206989	0.203172	0.132187
ENSMUSG00000040466	Blvrb	chr7:27447977-27466144	+	1414	1.30206	1.17224e-42	419.31	1.30206	1.17224e-42	419.31	0	1	0	-	528	498	416	465	205	197	168	167	8.6213	8.62207	8.48742	8.59689	7.93873	7.9221	7.88857	7.91221	16.434	16.4416	13.9947	15.8731	6.30218	6.20336	5.84169	6.04494
ENSMUSG00000094868	Dlx6os2	chr6:6863796-6865150	-	1354	1.30189	3.23525e-05	44.9009	1.30189	3.23525e-05	44.9009	0	1	0	-	18	20	17	22	5	7	3	3	3.56861	3.59493	3.57056	3.61876	3.45218	3.47244	3.43807	3.44027	0.585077	0.689564	0.597243	0.784263	0.160523	0.230192	0.108938	0.113404
ENSMUSG00000029162	Khk	chr5:30921555-30931246	+	1670	1.30012	3.93305e-38	374.053	1.30012	3.93305e-38	374.053	0	1	0	-	586	603	457	507	213	218	187	211	8.78795	8.86249	8.64373	8.74854	8.04904	8.07229	8.04136	8.14728	15.4433	16.8564	13.0173	14.6538	5.54433	5.81233	5.50559	6.46682
ENSMUSG00000039747	Orai2	chr5:136147463-136170656	-	3846	1.29672	5.83495e-36	352.34	1.29672	5.83495e-36	352.34	0	1	0	-	665	626	513	481	228	256	218	180	8.9322	8.93139	8.77558	8.74267	8.13285	8.21798	8.17986	8.08645	7.60978	7.59851	6.34496	6.03662	2.57698	2.96375	2.78693	2.39545
ENSMUSG00000090063	Dlx6os1	chr6:6820188-6871592	-	5230	1.29612	3.48786e-09	84.5744	1.29612	3.48786e-09	84.5744	0	1	0	-	72	89	93	53	27	34	22	23	5.72456	5.84521	5.873	5.64277	5.42545	5.48332	5.41036	5.4295	0.605885	0.794422	0.845866	0.489139	0.224413	0.289459	0.206823	0.225087
ENSMUSG00000050860	Phospho1	chr11:95824498-95832140	+	2029	1.29576	6.89718e-17	161.613	1.29576	6.89718e-17	161.613	0	1	0	-	210	190	149	147	68	74	50	67	7.13375	7.1061	6.96155	6.96787	6.53995	6.58012	6.47234	6.60242	4.55509	4.37154	3.49321	3.49698	1.45684	1.6239	1.21162	1.69012
ENSMUSG00000025170	Rab40b	chr11:121356124-121388251	-	2008	1.29511	5.20839e-16	152.833	1.29511	5.20839e-16	152.833	0	1	0	-	159	147	146	129	53	62	64	37	6.79566	6.78354	6.78754	6.72881	6.28389	6.34568	6.40002	6.22646	3.48492	3.41757	3.45867	3.10087	1.14736	1.3748	1.56709	0.943111
ENSMUSG00000040794	C1qtnf4	chr2:90885859-90890525	+	1290	1.29482	7.25618e-06	51.3929	1.29482	7.25618e-06	51.3929	0	1	0	-	26	31	34	25	13	8	8	4	4.21504	4.26743	4.2942	4.22653	4.10772	4.06276	4.07262	4.03383	0.88704	1.12185	1.25375	0.935423	0.438066	0.276128	0.304915	0.158707
ENSMUSG00000045636	Mtus1	chr8:40990913-41133726	-	10078	1.29356	1.13654e-69	689.444	1.29356	1.13654e-69	689.444	-1.30027	2.86464e-06	55.4293	chr8:41041472-41041864	1127	1099	1105	992	418	499	417	363	9.78938	9.82068	9.83815	9.76305	8.99096	9.13276	9.07437	9.00482	4.92163	5.09081	5.21565	4.75111	1.80297	2.20463	2.03442	1.84356
ENSMUSG00000081137	BC022960	chrX:169368188-169370003	+	1815	1.29322	2.74685e-20	195.612	1.29322	2.74685e-20	195.612	0	1	0	-	196	235	188	176	86	75	74	66	7.21225	7.37458	7.23238	7.2051	6.76645	6.71284	6.75326	6.72437	4.75268	6.04442	4.92722	4.68052	2.05972	1.8399	2.00463	1.8612
ENSMUSG00000054545	Ugt1a6a	chr1:88103251-88220002	+	5444	1.2906	4.5291e-49	483.44	1.2906	4.5291e-49	483.44	0	1	0	-	2172	1738	1674	1775	664	846	761	600	10.6829	10.5306	10.5088	10.5858	9.67484	9.87594	9.87238	9.71917	17.5591	14.9037	14.6271	15.7376	5.30195	6.9193	6.87298	5.64102
ENSMUSG00000031595	Pdgfrl	chr8:40926211-40990785	+	3126	1.28998	2.14186e-10	96.6921	1.28998	2.14186e-10	96.6921	0	1	0	-	575	579	573	482	244	174	126	239	8.76201	8.81808	8.82092	8.69648	8.12438	7.9201	7.80026	8.21882	8.0954	8.64675	8.71939	7.44245	3.39302	2.47839	1.9818	3.91321
ENSMUSG00000043099	Hic1	chr11:75164564-75169519	-	3750	1.28979	2.42225e-34	336.158	1.28979	2.42225e-34	336.158	0	1	0	-	385	402	342	331	142	145	135	143	8.18277	8.26347	8.1477	8.14116	7.52376	7.54299	7.56212	7.62104	4.51845	5.00447	4.33826	4.26044	1.64605	1.72166	1.77003	1.95177
ENSMUSG00000064246	Chi3l1	chr1:134182175-134190181	+	2804	1.28934	1.91804e-13	127.171	1.28934	1.91804e-13	127.171	0	1	0	-	207	203	163	147	53	100	63	49	7.14624	7.17226	7.03848	6.98967	6.46879	6.73906	6.57939	6.50322	3.24902	3.37972	2.76522	2.53045	0.821644	1.58793	1.10469	0.894422
ENSMUSG00000023949	Tcte1	chr17:45523433-45542679	+	3074	1.28853	8.9442e-05	40.4846	1.28853	8.9442e-05	40.4846	0	1	0	-	16	16	10	11	4	1	3	0	2.94331	2.95083	2.89756	2.90936	2.83619	2.80711	2.83098	2.79935	0.229074	0.242985	0.154745	0.172722	0.0565643	0.0144846	0.0479839	0
ENSMUSG00000054763	Defb42	chr14:63046990-63058149	+	2415	1.28617	2.07671e-07	66.8262	1.28617	2.07671e-07	66.8262	0	1	0	-	54	75	54	46	21	14	28	12	5.27474	5.42608	5.30003	5.25252	5.03614	4.97743	5.12059	4.98156	0.984093	1.4498	1.06365	0.919387	0.377997	0.25812	0.570058	0.254325
ENSMUSG00000025993	Slc40a1	chr1:45908069-45925594	-	3380	1.2849	9.3119e-19	180.31	1.2849	9.3119e-19	180.31	0	1	0	-	213	159	180	159	77	65	59	68	7.16994	7.01978	7.10653	7.04301	6.61896	6.55566	6.56074	6.63671	2.77346	2.19606	2.53324	2.27059	0.990285	0.856262	0.85825	1.02971
ENSMUSG00000020150	Gamt	chr10:80258150-80261012	-	1444	1.28433	4.70977e-23	223.27	1.28433	4.70977e-23	223.27	0	1	0	-	307	310	235	258	132	106	84	104	7.79898	7.85038	7.65891	7.74243	7.26168	7.15405	7.09481	7.22143	9.35687	10.0221	7.74143	8.62403	3.97368	3.2685	2.86016	3.6863
ENSMUSG00000025885	Myo5b	chr18:74440935-74771493	+	9766	1.28332	2.72276e-22	215.65	1.28332	2.72276e-22	215.65	-1.3213	0.00139689	28.5484	chr18:74653360-74653440	589	542	540	540	161	290	230	167	8.80527	8.78552	8.79395	8.81427	7.89518	8.27785	8.1888	8.01343	2.65435	2.59087	2.63025	2.66892	0.71663	1.32218	1.15795	0.875234
ENSMUSG00000028795	Ccdc28b	chr4:129619273-129623947	-	2026	1.27925	3.56068e-14	134.485	1.27925	3.56068e-14	134.485	-1.01472	1	0	chr4:129623816-129623944	171	168	114	138	49	52	60	58	6.85529	6.88059	6.66175	6.78321	6.27295	6.29748	6.38953	6.39414	3.71464	3.87109	2.67661	3.28774	1.05134	1.14281	1.4561	1.46525
ENSMUSG00000056481	Cd248	chr19:5068077-5070637	+	2560	1.27784	5.22616e-70	692.818	1.27784	5.22616e-70	692.818	0	1	0	-	1914	1830	1539	1743	670	732	704	673	10.5452	10.5593	10.4122	10.5497	9.65923	9.73833	9.78808	9.78688	32.905	33.3714	28.5969	32.8636	11.3768	12.7316	13.5211	13.4555
ENSMUSG00000074218	Cox7a1	chr7:30184170-30186028	+	364	1.27632	1.94501e-05	47.1108	1.27632	1.94501e-05	47.1108	0	1	0	-	35	20	29	24	3	7	10	9	4.17906	4.0713	4.14958	4.1129	3.90777	3.948	3.98755	3.98202	4.23181	2.56503	3.78981	3.18249	0.358266	0.856262	1.35076	1.26551
ENSMUSG00000018381	Abi3	chr11:95830073-95842476	-	4153	1.27407	2.0909e-15	146.797	1.27407	2.0909e-15	146.797	0	1	0	-	222	205	148	146	64	81	58	68	7.2039	7.18946	6.99044	6.99674	6.54967	6.65231	6.5597	6.64228	2.35261	2.30439	1.6952	1.69687	0.669891	0.868427	0.686664	0.838053
ENSMUSG00000037280	Galnt6	chr15:100691812-100729376	-	3871	1.27381	0.000109254	39.6156	1.27381	0.000109254	39.6156	0	1	0	-	10	15	13	16	2	0	1	5	2.93156	2.98366	2.96683	2.99778	2.85559	2.83541	2.84833	2.89427	0.113694	0.180897	0.15975	0.199505	0.0224591	0	0.0127015	0.0661107
ENSMUSG00000097305	Gm17276	chr17:32113428-32141839	+	2782	1.2736	3.49183e-05	44.5695	1.2736	3.49183e-05	44.5695	0	1	0	-	17	27	21	21	7	6	3	6	3.73161	3.82363	3.77684	3.78096	3.64447	3.63599	3.61212	3.64659	0.268937	0.453075	0.359073	0.364351	0.109377	0.0960294	0.0530203	0.110387
ENSMUSG00000022687	Boc	chr16:44485044-44558897	-	4456	1.27236	5.46079e-53	522.627	1.27236	5.46079e-53	522.627	-1.117	8.41324e-05	40.7504	chr16:44558436-44558896	1327	1316	1198	1163	467	581	533	404	10.022	10.0692	9.99616	9.99143	9.16968	9.34502	9.35715	9.18081	13.1065	13.7871	12.7889	12.5977	4.55573	5.80552	5.88112	4.64046
ENSMUSG00000069835	Sat2	chr11:69622023-69623870	+	1424	1.27085	4.34798e-24	233.617	1.27085	4.34798e-24	233.617	0	1	0	-	297	264	247	210	114	98	98	85	7.71076	7.66775	7.62981	7.53372	7.11828	7.04989	7.10199	7.05528	9.17922	8.6548	8.25102	7.11815	3.48001	3.06426	3.38372	3.05516
ENSMUSG00000030157	Clec2d	chr6:129180614-129186534	+	1213	1.26992	3.27008e-20	194.854	1.26992	3.27008e-20	194.854	0	1	0	-	224	185	184	174	72	83	63	77	7.27617	7.18796	7.19328	7.17264	6.6647	6.73128	6.66076	6.76563	8.12731	7.1199	7.21568	6.92383	2.58023	3.04668	2.55363	3.24904
ENSMUSG00000020732	Rab37	chr11:115091430-115162236	+	5330	1.26945	0.000105683	39.76	1.26945	0.000105683	39.76	0	1	0	-	18	17	9	12	3	2	3	2	3.07152	3.07113	2.99954	3.03039	2.9379	2.92852	2.94253	2.93335	0.148629	0.148897	0.0803222	0.108671	0.024467	0.0167076	0.027674	0.0192056
ENSMUSG00000013367	Iglon5	chr7:43472906-43490075	-	2619	1.2693	4.2686e-70	693.697	1.2693	4.2686e-70	693.697	0	1	0	-	1425	1472	1205	1233	570	549	494	514	10.1248	10.2099	10.0396	10.0825	9.36308	9.34436	9.34185	9.4057	23.9463	26.2383	21.8863	22.724	9.46075	9.33355	9.27406	10.0451
ENSMUSG00000044734	Serpinb1a	chr13:32842091-32851185	-	1943	1.2673	4.7964e-15	143.191	1.2673	4.7964e-15	143.191	0	1	0	-	191	152	164	155	53	91	52	55	7.03324	6.92684	6.98199	6.9617	6.40871	6.63337	6.44637	6.48425	4.32633	3.65203	4.01506	3.8505	1.18574	2.08535	1.31586	1.44882
ENSMUSG00000048450	Msx1	chr5:37820484-37824583	-	3097	1.26693	5.26393e-28	272.787	1.26693	5.26393e-28	272.787	0	1	0	-	885	901	686	811	261	394	347	282	9.40992	9.47885	9.25293	9.4193	8.47775	8.77334	8.75503	8.63853	12.5766	13.5815	10.5367	12.6397	3.66341	5.66455	5.50892	4.6605
ENSMUSG00000044017	Gpr133	chr5:129096749-129204599	+	8321	1.26654	8.34546e-06	50.7855	1.26654	8.34546e-06	50.7855	0	1	0	-	33	42	36	21	6	12	12	9	4.44174	4.52368	4.48272	4.36477	4.21456	4.27259	4.2856	4.26049	0.174541	0.235633	0.205801	0.121815	0.0313445	0.064212	0.0709062	0.0553594
ENSMUSG00000036867	Smad6	chr9:63953075-64022059	-	3205	1.26568	2.94153e-68	675.314	1.26568	2.94153e-68	675.314	0	1	0	-	2309	2230	2009	2025	807	998	890	733	10.8271	10.8509	10.7662	10.7965	9.93041	10.1111	10.1003	9.97943	31.707	32.4818	29.8176	30.4968	10.9454	13.8648	13.6534	11.7058
ENSMUSG00000062563	Cys1	chr12:24665837-24681813	-	2646	1.26493	1.34846e-14	138.702	1.26493	1.34846e-14	138.702	0	1	0	-	155	136	124	104	53	51	45	47	6.67977	6.63695	6.59201	6.50982	6.18301	6.17468	6.16974	6.19999	2.57811	2.39945	2.22922	1.89715	0.870707	0.858204	0.836182	0.909144
ENSMUSG00000037747	Phyhipl	chr10:70557681-70655965	-	9732	1.26434	5.84488e-19	182.332	1.26434	5.84488e-19	182.332	-1.65358	0.399657	3.98313	chr10:70567824-70571016	207	187	219	179	90	95	64	58	7.24992	7.22183	7.33689	7.21786	6.78904	6.8208	6.69448	6.6746	0.936112	0.897021	1.07044	0.887787	0.402	0.434642	0.323338	0.305036
ENSMUSG00000090124	Ugt1a7c	chr1:88095061-88220002	+	3233	1.26426	6.30815e-46	452.001	1.26426	6.30815e-46	452.001	0	1	0	-	2415	1926	1913	1976	753	975	872	671	10.8455	10.6896	10.6962	10.7493	9.84742	10.0642	10.0557	9.88124	32.8754	27.8108	28.1468	29.5012	10.1245	13.4279	13.2614	10.6229
ENSMUSG00000043648	Pld6	chr11:59783896-59787645	-	1757	1.26141	3.27728e-05	44.8449	1.26141	3.27728e-05	44.8449	0	1	0	-	18	28	21	23	6	5	6	7	3.81545	3.90719	3.85243	3.8737	3.71053	3.70189	3.71894	3.73278	0.450879	0.74396	0.568549	0.63185	0.148445	0.126709	0.167903	0.203916
ENSMUSG00000087691	Gm15674	chr1:130422823-130437914	+	2438	1.25797	0.000133995	38.7291	1.25797	0.000133995	38.7291	0	1	0	-	13	15	16	8	0	2	3	3	2.90658	2.93103	2.94166	2.86925	2.78565	2.80596	2.81985	2.82162	0.234676	0.287224	0.312181	0.158385	0	0.0365264	0.0605015	0.0629814
ENSMUSG00000029279	Brdt	chr5:107331158-107387058	+	5115	1.25687	1.34003e-09	88.7289	1.25687	1.34003e-09	88.7289	0	1	0	-	84	82	63	75	22	34	32	22	5.80325	5.81842	5.71156	5.79474	5.39828	5.49639	5.50866	5.43388	0.722758	0.748396	0.585889	0.707739	0.186966	0.295967	0.307597	0.220141
ENSMUSG00000020810	Cygb	chr11:116645594-116654313	-	2331	1.25431	5.96548e-20	192.244	1.25431	5.96548e-20	192.244	0	1	0	-	247	221	194	175	92	86	67	81	7.41968	7.38315	7.30444	7.25297	6.84991	6.82519	6.76444	6.86744	4.66352	4.42602	3.95895	3.62371	1.71566	1.64273	1.41322	1.77856
ENSMUSG00000026811	St6galnac6	chr2:32599708-32620806	+	4815	1.25421	2.87632e-67	665.412	1.25421	2.87632e-67	665.412	0	1	0	-	1056	1028	972	889	467	400	361	364	9.68521	9.71479	9.67705	9.61949	9.02186	8.91679	8.91698	8.95496	9.65222	9.9669	9.60264	8.91175	4.21606	3.69891	3.68629	3.86928
ENSMUSG00000024901	Peli3	chr19:4930650-4943127	-	3786	1.25414	1.4744e-11	108.314	1.25414	1.4744e-11	108.314	0	1	0	-	108	95	98	75	34	39	32	35	6.15738	6.12199	6.14415	6.02884	5.72699	5.7676	5.74415	5.78126	1.25546	1.1714	1.23131	0.956177	0.390377	0.458664	0.415573	0.473164
ENSMUSG00000008206	Cers4	chr8:4493025-4524676	+	5264	1.25337	5.40399e-36	352.673	1.25337	5.40399e-36	352.673	0	1	0	-	745	612	596	549	241	307	213	236	9.09728	8.97963	8.96891	8.92038	8.24341	8.41667	8.23971	8.33642	6.22874	5.42749	5.38581	5.03401	1.99016	2.59677	1.98949	2.29467
ENSMUSG00000030772	Dkk3	chr7:112116018-112159057	-	3357	1.25244	1.51133e-09	88.2064	1.25244	1.51133e-09	88.2064	0	1	0	-	75	87	86	64	29	23	27	34	5.78441	5.87679	5.87759	5.75829	5.48522	5.4401	5.49802	5.56819	0.983262	1.20985	1.21862	0.920209	0.37552	0.305061	0.395449	0.518385
ENSMUSG00000046618	Olfml2a	chr2:38931977-38963753	+	5579	1.25151	6.55595e-05	41.8336	1.25151	6.55595e-05	41.8336	0	1	0	-	23	13	22	26	5	9	3	4	3.73643	3.66	3.74092	3.77861	3.58131	3.61989	3.56774	3.58082	0.181439	0.10878	0.18758	0.224944	0.0389583	0.0718284	0.0264389	0.0366968
ENSMUSG00000062866	Phactr2	chr10:13207716-13474396	-	11688	1.25077	5.67247e-34	332.462	1.25077	5.67247e-34	332.462	1.12727	1	0	chr10:13239909-13239965	480	433	395	373	205	178	149	140	8.4646	8.42923	8.36697	8.34096	7.85552	7.77606	7.73285	7.72304	1.80743	1.72946	1.6076	1.54037	0.762429	0.678094	0.626793	0.613073
ENSMUSG00000074457	S100a16	chr3:90537253-90543151	+	1617	1.24976	1.3067e-50	498.838	1.24976	1.3067e-50	498.838	0	1	0	-	1031	891	764	801	356	374	338	333	9.59028	9.51337	9.39094	9.45327	8.74033	8.78511	8.7862	8.80716	28.0613	25.7235	22.4752	23.91	9.57031	10.2984	10.2774	10.5404
ENSMUSG00000019944	Rhobtb1	chr10:69151433-69291791	+	6075	1.24974	1.63318e-24	237.87	1.24974	1.63318e-24	237.87	-1.4364	1	0	chr10:69248768-69248976	283	279	296	262	125	91	119	107	7.75882	7.7915	7.84533	7.77321	7.253	7.10257	7.2901	7.25735	2.05022	2.14398	2.31775	2.08167	0.894437	0.666968	0.963117	0.901493
ENSMUSG00000047586	Nccrp1	chr7:28543595-28547254	-	1531	1.24753	1.36111e-05	48.6611	1.24753	1.36111e-05	48.6611	0	1	0	-	51	37	24	25	11	14	11	5	4.60319	4.52183	4.4211	4.4346	4.2967	4.32576	4.31073	4.25277	1.46607	1.12821	0.745687	0.788175	0.312323	0.407158	0.353261	0.167155
ENSMUSG00000043953	Ccrl2	chr9:111054834-111057270	-	2110	1.24654	6.83162e-05	41.6548	1.24654	6.83162e-05	41.6548	0	1	0	-	26	17	16	25	3	8	3	7	3.76327	3.69908	3.69218	3.77371	3.56537	3.61387	3.57102	3.616	0.542314	0.376123	0.36071	0.571894	0.0618052	0.168818	0.0699064	0.169801
ENSMUSG00000097758	Dio3os	chr12:110275383-110278068	-	1281	1.24511	0.000134544	38.7113	1.24511	0.000134544	38.7113	0	1	0	-	10	9	12	6	1	0	1	1	2.31677	2.31236	2.34166	2.28569	2.23243	2.22255	2.23457	2.23541	0.343566	0.327987	0.445608	0.226079	0.0339341	0	0.0383821	0.0399554
ENSMUSG00000021765	Fst	chr13:114452261-114458730	-	2337	1.24268	5.2313e-25	242.814	1.24268	5.2313e-25	242.814	0	1	0	-	536	517	522	501	167	283	202	175	8.69718	8.71658	8.73601	8.72204	7.88416	8.22993	8.07228	8.01015	10.0941	10.3275	10.6251	10.3475	3.1063	5.39185	4.24982	3.83269
ENSMUSG00000032773	Chrm1	chr19:8663788-8683587	+	6487	1.24224	6.79648e-05	41.6772	1.24224	6.79648e-05	41.6772	0	1	0	-	21	24	17	17	3	5	7	5	3.6531	3.6884	3.63003	3.63359	3.49195	3.51244	3.53991	3.52192	0.142474	0.172715	0.12466	0.126492	0.0201031	0.0343191	0.0530558	0.0394503
ENSMUSG00000031965	Tbx20	chr9:24720811-24774303	-	6884	1.23983	0.000171209	37.6647	1.23983	0.000171209	37.6647	0	1	0	-	20	15	14	5	1	4	1	2	2.98712	2.95176	2.94425	2.8581	2.81357	2.84427	2.81641	2.82893	0.127864	0.101722	0.0967404	0.035058	0.00631459	0.025872	0.00714229	0.0148701
ENSMUSG00000059824	Dbp	chr7:45705087-45710155	+	2945	1.23948	5.67691e-20	192.459	1.23948	5.67691e-20	192.459	0	1	0	-	278	227	244	221	75	107	96	103	7.62997	7.52832	7.58844	7.53588	6.89067	7.05938	7.05796	7.11645	4.1545	3.59835	3.94117	3.62214	1.10704	1.61774	1.60274	1.7901
ENSMUSG00000022479	Vdr	chr15:97854424-97910630	-	5650	1.23851	1.1179e-49	489.516	1.23851	1.1179e-49	489.516	0	1	0	-	638	610	579	567	243	276	214	239	8.94404	8.95654	8.92418	8.92699	8.22704	8.32113	8.2208	8.32325	4.96972	5.04016	4.87473	4.84387	1.86958	2.17506	1.86227	2.16508
ENSMUSG00000026070	Il18r1	chr1:40465551-40500854	+	4750	1.23799	4.98511e-05	43.0233	1.23799	4.98511e-05	43.0233	0	1	0	-	30	25	15	25	10	8	4	4	3.97149	3.94452	3.86119	3.95183	3.80903	3.79183	3.75993	3.76265	0.277963	0.245703	0.150217	0.254041	0.091515	0.0749906	0.0414042	0.0431014
ENSMUSG00000019872	Smpdl3a	chr10:57794334-57811830	+	2065	1.23664	5.38922e-05	42.6847	1.23664	5.38922e-05	42.6847	0	1	0	-	21	28	27	26	13	8	1	6	3.99875	4.06748	4.06222	4.0589	3.93191	3.88689	3.82173	3.87916	0.447568	0.632996	0.621963	0.607731	0.273659	0.172496	0.0238099	0.148715
ENSMUSG00000039081	Zfp503	chr14:21983961-21989601	-	4213	1.23635	5.71938e-67	662.427	1.23635	5.71938e-67	662.427	0	1	0	-	1528	1439	1361	1347	540	664	600	512	10.2286	10.2286	10.1903	10.2032	9.36837	9.53762	9.53789	9.44864	15.9622	15.9453	15.3669	15.4324	5.57171	7.01757	7.00226	6.22018
ENSMUSG00000034532	Fbxo16	chr14:65266700-65321501	+	1228	1.23477	3.35939e-05	44.7374	1.23477	3.35939e-05	44.7374	0	1	0	-	27	24	21	22	9	8	5	5	3.96006	3.94737	3.92438	3.93737	3.80869	3.80045	3.77854	3.78167	0.967665	0.912381	0.81347	0.864733	0.318589	0.290069	0.200194	0.208399
ENSMUSG00000007783	Cpt1c	chr7:44959372-44974851	-	2793	1.23471	7.09928e-60	591.488	1.23471	7.09928e-60	591.488	0	1	0	-	999	870	817	819	407	348	349	326	9.56941	9.49979	9.4568	9.48029	8.8458	8.7422	8.81788	8.80044	15.7418	14.5416	13.9146	14.1537	6.33446	5.54777	6.14374	5.97408
ENSMUSG00000022203	Efs	chr14:54916542-54926788	-	3571	1.23431	2.57628e-08	75.8901	1.23431	2.57628e-08	75.8901	0	1	0	-	70	53	66	59	20	20	21	28	5.50277	5.41883	5.50751	5.47225	5.15914	5.16171	5.19133	5.26298	0.862716	0.692866	0.879173	0.79748	0.243459	0.249374	0.28914	0.401322
ENSMUSG00000026817	Ak1	chr2:32621757-32646805	+	2793	1.23387	5.65599e-55	542.475	1.23387	5.65599e-55	542.475	0	1	0	-	1344	1105	1046	1088	518	490	396	464	9.99117	9.86781	9.83113	9.88831	9.19881	9.16659	9.08488	9.23599	21.1781	18.4695	17.8148	18.8025	8.06204	7.81152	6.97112	8.50299
ENSMUSG00000039004	Bmp6	chr13:38345715-38499728	+	2410	1.23375	7.23132e-19	181.408	1.23375	7.23132e-19	181.408	0	1	0	-	206	180	165	165	72	79	74	58	7.16907	7.11926	7.07272	7.08775	6.6133	6.65819	6.67599	6.59499	3.76192	3.48673	3.25677	3.30464	1.29868	1.45955	1.50971	1.23179
ENSMUSG00000027931	Npr1	chr3:90450590-90465866	-	4783	1.22984	1.31564e-14	138.809	1.22984	1.31564e-14	138.809	-1.00639	1	0	chr3:90464792-90465864	134	131	121	123	51	62	43	43	6.59075	6.61096	6.57396	6.59635	6.16615	6.24084	6.15132	6.16654	1.233	1.2786	1.20339	1.24126	0.463506	0.577167	0.442025	0.460143
ENSMUSG00000053550	Shisa7	chr7:4825551-4844696	-	6639	1.22876	0.00017936	37.4628	1.22876	0.00017936	37.4628	0	1	0	-	14	9	8	8	1	1	2	0	2.44548	2.406	2.39748	2.39926	2.32612	2.32636	2.33913	2.31793	0.0928079	0.0632853	0.0573202	0.0581628	0.00654762	0.00670668	0.0148117	0
ENSMUSG00000097820	E530011L22Rik	chr9:121757206-121759788	-	2007	1.22718	3.87756e-08	74.1144	1.22718	3.87756e-08	74.1144	0	1	0	-	82	85	61	53	19	26	32	24	5.70222	5.74464	5.60831	5.56441	5.28215	5.34305	5.41751	5.36038	1.79815	1.97713	1.44578	1.27464	0.411521	0.576814	0.783937	0.612052
ENSMUSG00000024998	Plce1	chr19:38481108-38785030	+	15998	1.22674	9.00733e-23	220.454	1.22674	9.00733e-23	220.454	-1.10901	1	0	chr19:38750440-38751124	250	226	230	194	98	98	81	84	7.49972	7.47045	7.49208	7.39264	6.95406	6.96057	6.92149	6.95945	0.687755	0.659487	0.683884	0.585321	0.266285	0.272754	0.248942	0.268744
ENSMUSG00000027200	Sema6d	chr2:124089968-124667770	+	10559	1.22399	1.44225e-12	118.41	1.22399	1.44225e-12	118.41	0	1	0	-	119	162	143	127	43	60	51	59	6.59755	6.80967	6.74204	6.68677	6.18422	6.30041	6.28073	6.35234	0.496002	0.716235	0.644219	0.580549	0.177024	0.253011	0.237479	0.285992
ENSMUSG00000044468	Fam46c	chr3:100451627-100489324	-	6097	1.22366	6.88073e-51	501.624	1.22366	6.88073e-51	501.624	-1.11725	1	0	chr3:100489096-100489328	1043	978	936	907	375	481	400	332	9.66637	9.66238	9.63566	9.62938	8.85226	9.04576	8.98358	8.87986	7.52883	7.48835	7.30264	7.1804	2.67363	3.51268	3.22569	2.78706
ENSMUSG00000035112	Wnk4	chr11:101260566-101277409	+	4148	1.22346	2.66393e-12	115.745	1.22346	2.66393e-12	115.745	-1.06396	1	0	chr11:101268704-101268824	107	107	99	100	42	50	32	36	6.26268	6.29262	6.25965	6.27679	5.89606	5.95515	5.85611	5.90133	1.13528	1.20423	1.13532	1.16364	0.440146	0.536712	0.379306	0.44421
ENSMUSG00000061411	8430427H17Rik	chr2:153407461-153529971	-	9083	1.22177	1.41911e-29	288.48	1.22177	1.41911e-29	288.48	0	1	0	-	375	312	344	323	133	160	121	136	8.12113	8.02627	8.11082	8.08104	7.44517	7.55709	7.45881	7.54899	1.81703	1.60357	1.80156	1.71645	0.636515	0.784334	0.65499	0.766362
ENSMUSG00000025092	Hspa12a	chr19:58795750-58860984	-	5733	1.21959	2.4712e-28	276.071	1.21959	2.4712e-28	276.071	0	1	0	-	458	451	444	406	150	224	186	155	8.46448	8.50001	8.49848	8.44608	7.70959	7.96133	7.90795	7.82354	3.51595	3.67247	3.68402	3.41823	1.13735	1.73971	1.59518	1.3838
ENSMUSG00000044548	Dact1	chr12:71309883-71320107	+	3761	1.21918	5.55217e-17	162.555	1.21918	5.55217e-17	162.555	-1.22057	1	0	chr12:71312688-71312816	261	263	307	225	112	145	90	76	7.65268	7.70039	7.82479	7.6167	7.14552	7.29277	7.09724	7.04128	3.05419	3.26449	3.88289	2.8876	1.2945	1.71662	1.17657	1.03427
ENSMUSG00000025500	1600016N20Rik	chr7:141210042-141214082	-	2079	1.21762	2.54037e-07	65.951	1.21762	2.54037e-07	65.951	0	1	0	-	59	43	49	46	17	17	20	16	5.16856	5.08116	5.12778	5.11445	4.86581	4.86803	4.91334	4.88406	1.24898	0.965555	1.12115	1.06798	0.355452	0.364087	0.472992	0.393904
ENSMUSG00000051076	Vtcn1	chr3:100825458-100895679	+	1379	1.21751	0.000227563	36.429	1.21751	0.000227563	36.429	0	1	0	-	13	11	10	11	1	2	1	3	2.71503	2.70299	2.69489	2.70665	2.60413	2.61441	2.60662	2.6298	0.414895	0.372385	0.34495	0.385023	0.0315226	0.0645767	0.0356545	0.111348
ENSMUSG00000022665	Ccdc80	chr16:45093401-45127924	+	4140	1.2173	1.81803e-22	217.404	1.2173	1.81803e-22	217.404	0	1	0	-	15092	14195	13284	12488	5076	6909	5923	4357	13.5435	13.5426	13.4916	13.4556	12.5639	12.8412	12.7943	12.5675	160.438	160.066	152.633	145.596	53.2976	74.3062	70.3428	53.8656
ENSMUSG00000026888	Grb14	chr2:64912475-65024987	-	7185	1.21727	4.64592e-61	603.329	1.21727	4.64592e-61	603.329	0	1	0	-	1398	1265	1266	1197	488	615	539	476	10.094	10.0575	10.0709	10.0422	9.23107	9.41739	9.39384	9.33189	8.56328	8.21915	8.38161	8.04128	2.95243	3.81117	3.68842	3.39082
ENSMUSG00000089957	A830011K09Rik	chr6:138423104-138429592	+	2547	1.21711	0.000124997	39.031	1.21711	0.000124997	39.031	0	1	0	-	13	10	8	3	0	0	1	0	2.13398	2.11248	2.09457	2.04581	2.01339	2.01351	2.02536	2.01486	0.224633	0.183288	0.149411	0.0568526	0	0	0.0193041	0
ENSMUSG00000002799	Jag2	chr12:112908589-112929495	-	4054	1.21551	6.49281e-09	81.8757	1.21551	6.49281e-09	81.8757	0	1	0	-	505	511	462	402	136	250	196	122	8.55978	8.6187	8.54681	8.4541	7.67064	8.05002	7.95645	7.70309	5.48236	5.88438	5.42099	4.7863	1.45828	2.74578	2.37712	1.54028
ENSMUSG00000015890	Amdhd1	chr10:93523337-93540033	-	2421	1.21503	1.13117e-07	69.4647	1.21503	1.13117e-07	69.4647	0	1	0	-	63	72	64	46	25	30	14	20	5.44319	5.52031	5.47708	5.36513	5.18235	5.22514	5.10829	5.1732	1.14526	1.38836	1.25749	0.917109	0.448881	0.551743	0.284323	0.422824
ENSMUSG00000039492	Ccdc27	chr4:154026638-154042677	-	2089	1.21272	0.000107872	39.6709	1.21272	0.000107872	39.6709	0	1	0	-	15	27	19	19	5	7	3	6	3.62754	3.73864	3.67326	3.67713	3.53682	3.55712	3.52287	3.55806	0.316018	0.603377	0.432649	0.439008	0.104044	0.1492	0.0706092	0.147007
ENSMUSG00000002020	Ltbp2	chr12:84783211-84876532	-	8184	1.21266	4.66656e-13	123.31	1.21266	4.66656e-13	123.31	0	1	0	-	2157	2212	2102	1770	660	1004	941	627	10.7349	10.8152	10.7802	10.6427	9.74154	10.0834	10.1136	9.82354	11.5996	12.6178	12.2176	10.4392	3.50562	5.46233	5.6533	3.92127
ENSMUSG00000085529	Gm15865	chr5:43549929-43557769	-	783	1.2115	0.000199051	37.0104	1.2115	0.000199051	37.0104	0	1	0	-	10	6	10	10	0	2	1	0	2.28244	2.24915	2.28861	2.2907	2.18809	2.20835	2.20021	2.18975	0.56208	0.357728	0.607517	0.616447	0	0.113731	0.0627938	0
ENSMUSG00000036103	Colec12	chr18:9707647-9877995	+	3322	1.21058	2.39038e-112	1116.22	1.21058	2.39038e-112	1116.22	0	1	0	-	2726	2799	2767	2449	1178	1195	1078	1040	11.1115	11.1932	11.1955	11.1035	10.3855	10.4079	10.4065	10.4127	36.1148	39.3339	39.6214	35.5834	15.4146	16.0169	15.955	16.0235
ENSMUSG00000053647	Gper1	chr5:139423150-139427800	+	2537	1.20925	0.000181179	37.4189	1.20925	0.000181179	37.4189	0	1	0	-	20	18	13	19	6	1	2	7	3.4556	3.4475	3.40389	3.46222	3.33196	3.28284	3.29702	3.35365	0.346952	0.331219	0.243749	0.361485	0.102806	0.0175505	0.0387604	0.141222
ENSMUSG00000024784	Gpha2	chr19:6226379-6227768	+	770	1.20836	1.14512e-07	69.4115	1.20836	1.14512e-07	69.4115	0	1	0	-	78	75	56	70	15	30	22	34	5.67877	5.68668	5.57427	5.67268	5.24571	5.37324	5.33084	5.4444	4.45824	4.54709	3.45954	4.38798	0.846811	1.73477	1.40479	2.26002
ENSMUSG00000020057	Dram1	chr10:88322803-88379080	-	3045	1.2081	1.5986e-24	237.963	1.2081	1.5986e-24	237.963	0	1	0	-	331	378	353	279	155	136	143	114	8.01933	8.1669	8.12412	7.96492	7.52371	7.45751	7.54507	7.44409	4.7841	5.79519	5.51452	4.42257	2.21274	1.98867	2.30902	1.91621
ENSMUSG00000087331	1810021B22Rik	chr15:89071195-89075852	-	896	1.20797	2.20943e-06	56.5572	1.20797	2.20943e-06	56.5572	0	1	0	-	47	42	38	41	18	16	7	17	4.89043	4.87321	4.84763	4.87696	4.67393	4.65864	4.58648	4.69203	2.3086	2.18829	2.01742	2.20868	0.873274	0.795101	0.384121	0.971104
ENSMUSG00000041012	Cmtm8	chr9:114789344-114844152	-	1064	1.20729	9.06321e-09	80.4272	1.20729	9.06321e-09	80.4272	0	1	0	-	72	72	60	65	32	21	26	22	5.61861	5.64274	5.57431	5.6154	5.36018	5.27525	5.3405	5.31547	2.97818	3.15903	2.68244	2.94869	1.30736	0.878796	1.20146	1.05829
ENSMUSG00000038776	Ephx1	chr1:180976154-181020904	-	2005	1.20697	4.18873e-63	623.779	1.20697	4.18873e-63	623.779	0	1	0	-	2251	1942	1648	1844	835	862	745	756	10.7555	10.6733	10.5347	10.6608	9.90092	9.93685	9.90146	9.94799	49.4107	45.2166	39.0988	44.392	18.1033	19.1427	18.2692	19.2989
ENSMUSG00000006494	Pdk1	chr2:71873223-71903858	+	7779	1.20691	1.05754e-45	449.757	1.20691	1.05754e-45	449.757	0	1	0	-	1178	1132	1298	965	499	543	439	420	9.87494	9.89305	10.0304	9.78487	9.17454	9.24903	9.16502	9.16473	6.66471	6.79338	7.93727	5.98772	2.78845	3.10804	2.77472	2.76344
ENSMUSG00000074577	Fam65c	chr2:167980163-168010618	-	4244	1.20395	6.29063e-11	102.013	1.20395	6.29063e-11	102.013	0	1	0	-	106	98	85	87	43	32	41	30	6.16342	6.15305	6.09071	6.11293	5.80816	5.7318	5.83051	5.75644	1.09923	1.07799	0.952717	0.989468	0.440432	0.335726	0.474993	0.361802
ENSMUSG00000072949	Acot1	chr12:84009501-84017670	+	1559	1.20361	1.01014e-27	269.956	1.20361	1.01014e-27	269.956	0	1	0	-	322	306	321	264	128	139	121	111	7.92695	7.9331	7.97947	7.8524	7.34262	7.39502	7.37639	7.35441	9.09011	9.16302	9.79444	8.17364	3.56903	3.96989	3.81608	3.64419
ENSMUSG00000040564	Apoc1	chr7:19689483-19692658	-	537	1.20234	0.000141938	38.479	1.20234	0.000141938	38.479	0	1	0	-	19	6	7	4	0	0	1	0	2.24153	2.12807	2.13893	2.10944	2.06547	2.06559	2.07784	2.06707	1.55718	0.521603	0.620075	0.359537	0	0	0.0915596	0
ENSMUSG00000063458	1700112E06Rik	chr14:22019711-23056085	+	2714	1.20226	0.000238927	36.2174	1.20226	0.000238927	36.2174	0	1	0	-	14	19	10	19	1	6	2	4	3.21944	3.27041	3.19092	3.27613	3.09988	3.1492	3.11379	3.13729	0.227027	0.326819	0.175271	0.33791	0.0160168	0.0984355	0.0362325	0.0754353
ENSMUSG00000006235	Epor	chr9:21958898-21963576	-	1829	1.20204	1.24851e-11	109.036	1.20204	1.24851e-11	109.036	0	1	0	-	134	143	133	93	44	47	49	56	6.57745	6.64858	6.61407	6.43526	6.10502	6.12999	6.18027	6.24549	3.22441	3.64994	3.45906	2.4543	1.04574	1.14418	1.31723	1.56711
ENSMUSG00000017740	Slc12a5	chr2:164960815-164999727	+	7177	1.20178	2.60608e-05	45.8401	1.20178	2.60608e-05	45.8401	0	1	0	-	30	25	32	28	8	6	13	9	4.27607	4.24874	4.30836	4.2816	4.0917	4.07367	4.15265	4.11771	0.183966	0.162615	0.212094	0.18831	0.0484544	0.0372236	0.0890592	0.0641836
ENSMUSG00000036256	Igfbp7	chr5:77349239-77408045	-	1213	1.20152	1.97948e-57	567.034	1.20152	1.97948e-57	567.034	0	1	0	-	7614	8085	7136	5904	3048	3419	2697	2842	12.5783	12.695	12.5873	12.4296	11.76	11.8695	11.7528	11.8344	276.256	311.159	279.843	234.933	109.23	125.501	109.32	119.919
ENSMUSG00000018566	Slc2a4	chr11:69942538-69948188	-	3478	1.19951	0.000280152	35.5261	1.19951	0.000280152	35.5261	0	1	0	-	12	22	12	9	3	4	3	0	2.99389	3.08944	3.0016	2.97488	2.90989	2.92041	2.91461	2.88231	0.151849	0.295295	0.164124	0.124902	0.0374954	0.0512083	0.0424102	0
ENSMUSG00000062157	Ifnlr1	chr4:135686286-135708181	+	4182	1.19894	5.21292e-12	112.829	1.19894	5.21292e-12	112.829	0	1	0	-	117	110	105	107	45	41	54	33	6.3768	6.37497	6.35767	6.37998	5.98485	5.96116	6.08722	5.94581	1.23129	1.22793	1.19433	1.23497	0.467751	0.436526	0.634875	0.403882
ENSMUSG00000092220	Gm20528	chr1:88055392-88218584	-	1062	1.19885	1.21957e-32	319.138	1.19885	1.21957e-32	319.138	0	1	0	-	621	477	491	487	203	243	228	185	8.83224	8.66269	8.69753	8.71073	8.01514	8.13927	8.16544	8.05879	25.7351	20.968	21.9926	22.1341	8.30917	10.1881	10.5557	8.91604
ENSMUSG00000010064	Slc38a3	chr9:107650638-107668968	-	3526	1.1987	6.12805e-10	92.1268	1.1987	6.12805e-10	92.1268	0	1	0	-	88	91	77	73	34	36	24	33	5.93267	5.97569	5.90456	5.89151	5.60206	5.62061	5.55151	5.63898	1.0984	1.20482	1.03879	0.999306	0.419163	0.454601	0.334663	0.479023
ENSMUSG00000026072	Il1r1	chr1:40225079-40316198	+	5056	1.19644	1.10788e-83	829.555	1.19644	1.10788e-83	829.555	0	1	0	-	1866	1863	1903	1706	770	844	791	687	10.5603	10.6145	10.6472	10.5684	9.81333	9.89677	9.92638	9.84836	16.2429	17.2016	17.9041	16.2866	6.62018	7.43268	7.69215	6.95463
ENSMUSG00000057092	Fxyd3	chr7:31068171-31076704	-	4770	1.19356	0.00018823	37.2531	1.19356	0.00018823	37.2531	0	1	0	-	28	16	17	12	5	3	6	4	3.58405	3.49381	3.50475	3.4614	3.38638	3.36729	3.40405	3.38539	0.258344	0.15659	0.169532	0.121428	0.0455657	0.0280035	0.0618459	0.0429206
ENSMUSG00000001435	Col18a1	chr10:77052177-77166548	-	7021	1.19307	4.49979e-53	523.468	1.19307	4.49979e-53	523.468	1.1485	0.00548341	22.6095	chr10:77112216-77113944	1415	1313	1211	1135	639	524	456	513	10.1025	10.0889	10.028	9.99166	9.43458	9.2912	9.26381	9.38654	8.86986	8.7303	8.20476	7.80287	3.95629	3.32309	3.19333	3.73975
ENSMUSG00000097885	5031434O11Rik	chr3:51559756-51567117	+	3754	1.19258	3.75671e-10	94.2519	1.19258	3.75671e-10	94.2519	0	1	0	-	88	88	79	76	33	37	34	25	5.94301	5.97003	5.92641	5.91966	5.60514	5.63856	5.6451	5.58171	1.03169	1.09434	1.00104	0.977186	0.382125	0.438852	0.445311	0.340856
ENSMUSG00000096847	Tmem151b	chr17:45541939-45549677	-	4851	1.19218	7.17774e-06	51.4401	1.19218	7.17774e-06	51.4401	0	1	0	-	41	49	37	32	19	8	11	16	4.77693	4.85036	4.76779	4.73513	4.61012	4.51276	4.55416	4.60968	0.371974	0.47155	0.36282	0.318402	0.170258	0.0734292	0.111491	0.168816
ENSMUSG00000054662	Ano9	chr7:141101218-141117806	-	3012	1.19157	0.000312954	35.0452	1.19157	0.000312954	35.0452	0	1	0	-	9	11	9	12	2	2	1	1	2.5399	2.56336	2.54572	2.57644	2.47448	2.47483	2.46691	2.46784	0.131506	0.170491	0.142137	0.192302	0.0288643	0.0295655	0.0163239	0.016993
ENSMUSG00000041809	Efhc1	chr1:20951625-20990838	+	2205	1.19045	3.09188e-08	75.0978	1.19045	3.09188e-08	75.0978	0	1	0	-	67	70	66	58	29	32	16	22	5.55692	5.59823	5.57943	5.53773	5.30451	5.33097	5.21837	5.28266	1.33729	1.48202	1.42382	1.26963	0.57171	0.646177	0.356771	0.510668
ENSMUSG00000039824	Myl6b	chr10:128494156-128498685	-	1026	1.19035	1.36906e-12	118.636	1.19035	1.36906e-12	118.636	0	1	0	-	112	127	109	105	46	52	45	38	6.38965	6.48912	6.41314	6.40597	6.02815	6.07276	6.06052	6.02259	4.8043	5.77856	5.05359	4.93969	1.94893	2.25666	2.15647	1.89566
ENSMUSG00000078247	Airn	chr17:12741310-12860122	+	3583	1.18997	2.6331e-07	65.7953	1.18997	2.6331e-07	65.7953	0	1	0	-	52	61	49	59	27	25	16	14	5.26841	5.34713	5.27253	5.34829	5.09313	5.07995	5.02155	5.00994	0.638728	0.794779	0.650534	0.794809	0.327569	0.310673	0.219559	0.199989
ENSMUSG00000025545	Clybl	chr14:122181693-122402232	+	1239	1.18962	9.25297e-43	420.337	1.18962	9.25297e-43	420.337	0	1	0	-	630	612	535	508	257	243	229	229	8.91198	8.93791	8.83668	8.814	8.24124	8.21287	8.24208	8.27156	22.3784	23.0592	20.5401	19.7902	9.0167	8.73263	9.08746	9.45995
ENSMUSG00000028782	Bai2	chr4:129984869-130022633	+	6487	1.18782	2.41223e-44	436.176	1.18782	2.41223e-44	436.176	-1.93069	8.02611e-07	60.9549	chr4:129984872-129985304	1513	1379	1133	1187	516	630	515	525	10.1784	10.1483	9.98293	10.0467	9.28646	9.4498	9.37233	9.42085	10.2649	9.92393	8.30819	8.83211	3.45774	4.32421	3.90339	4.14229
ENSMUSG00000036908	Unc93b1	chr19:3935185-3949340	+	2841	1.18773	5.55082e-12	112.556	1.18773	5.55082e-12	112.556	0	1	0	-	117	107	101	94	48	47	34	38	6.33295	6.31652	6.29374	6.26956	5.96163	5.95929	5.8967	5.94175	1.81248	1.75823	1.69111	1.59703	0.734439	0.736609	0.588418	0.6846
ENSMUSG00000085314	Gm14866	chrX:100736982-100740929	-	2118	1.18758	7.89069e-05	41.0289	1.18758	7.89069e-05	41.0289	0	1	0	-	23	22	23	20	6	6	8	6	3.85973	3.86199	3.87297	3.85121	3.71189	3.71284	3.74111	3.72388	0.477927	0.484909	0.516562	0.455787	0.123143	0.126135	0.185713	0.144994
ENSMUSG00000086158	Gm5918	chr9:72979721-72985382	-	2404	1.18557	7.09268e-14	131.492	1.18557	7.09268e-14	131.492	0	1	0	-	144	139	118	115	53	55	48	52	6.65642	6.66973	6.58484	6.58382	6.20443	6.22212	6.21275	6.25719	2.63626	2.69925	2.3349	2.30899	0.958357	1.01868	0.981714	1.10712
ENSMUSG00000043259	Fam13c	chr10:70440667-70558731	+	3520	1.18344	1.43043e-23	228.445	1.18344	1.43043e-23	228.445	0	1	0	-	373	372	441	386	188	203	142	125	8.23103	8.27494	8.42112	8.33367	7.76569	7.82221	7.66897	7.62321	4.66365	4.93359	5.95959	5.29301	2.32167	2.56781	1.98346	1.81757
ENSMUSG00000035561	Aldh1b1	chr4:45799021-45804604	+	2298	1.18203	1.66629e-18	177.782	1.18203	1.66629e-18	177.782	0	1	0	-	240	240	209	176	106	85	81	84	7.44543	7.48642	7.40046	7.30323	6.96639	6.8685	6.89523	6.93311	4.59643	4.87556	4.3263	3.69675	2.00513	1.64694	1.73306	1.87091
ENSMUSG00000082286	Pisd-ps1	chr11:3125903-3131004	+	1757	1.17802	7.90075e-89	881.023	1.17802	7.90075e-89	881.023	0	1	0	-	2253	2121	1982	1862	874	971	868	793	10.7981	10.7978	10.7476	10.7124	9.98669	10.0821	10.0734	10.0355	56.4351	56.355	53.6602	51.1524	21.6235	24.6069	24.2899	23.1007
ENSMUSG00000024247	Pkdcc	chr17:83215291-83225070	+	2712	1.17794	4.95661e-77	763.048	1.17794	4.95661e-77	763.048	0	1	0	-	1849	1857	1636	1605	736	773	724	724	10.5251	10.585	10.4805	10.4854	9.74699	9.796	9.82484	9.85974	30.0059	31.9658	28.6955	28.5656	11.7971	12.6911	13.1258	13.6639
ENSMUSG00000035279	Ssc5d	chr7:4925843-4944821	+	4284	1.17635	2.97489e-10	95.2653	1.17635	2.97489e-10	95.2653	-1.39588	1	0	chr7:4933134-4933452	108	108	100	85	44	28	42	44	6.24513	6.27517	6.24237	6.17432	5.88734	5.77308	5.91068	5.94034	1.10952	1.17689	1.11038	0.957695	0.446467	0.291017	0.482035	0.525688
ENSMUSG00000060284	Sp7	chr15:102356608-102366325	-	2906	1.17576	0.000211198	36.7531	1.17576	0.000211198	36.7531	0	1	0	-	16	18	18	17	4	3	5	6	3.44814	3.47393	3.47599	3.47056	3.33929	3.33001	3.35611	3.36971	0.242317	0.289161	0.294644	0.282365	0.0598343	0.0459659	0.0845966	0.105677
ENSMUSG00000029372	Ppbp	chr5:90768517-90770060	+	1080	1.17535	2.10631e-06	56.7648	1.17535	2.10631e-06	56.7648	0	1	0	-	51	44	46	36	15	23	13	13	4.99381	4.96449	4.98289	4.91605	4.72487	4.79549	4.72385	4.73045	2.07829	1.90192	2.02607	1.60893	0.603745	0.948231	0.591831	0.61609
ENSMUSG00000036412	Arsi	chr18:60911779-60918561	+	2975	1.17331	1.77869e-06	57.499	1.17331	1.77869e-06	57.499	0	1	0	-	65	65	53	36	23	14	17	25	5.3265	5.34898	5.27652	5.16121	5.03694	4.96183	5.00682	5.0887	0.961581	1.01998	0.847441	0.584081	0.336068	0.209532	0.280957	0.430108
ENSMUSG00000058756	Thra	chr11:98740637-98769006	+	4614	1.17047	1.2764e-77	768.94	1.17047	1.2764e-77	768.94	0	1	0	-	2182	2049	1764	1870	901	850	797	819	10.7461	10.7434	10.6175	10.694	9.9854	9.94906	9.9789	10.0361	20.8131	20.7313	18.1862	19.5624	8.48854	8.2026	8.49296	9.08513
ENSMUSG00000028871	Rspo1	chr4:124986429-125009099	+	1938	1.16912	5.69307e-30	292.447	1.16912	5.69307e-30	292.447	0	1	0	-	806	730	741	658	292	386	243	320	9.28125	9.24718	9.27213	9.19083	8.50063	8.70828	8.45635	8.67755	18.3038	17.5846	18.188	16.3881	6.5496	8.86837	6.16497	8.45125
ENSMUSG00000096956	0610007N19Rik	chr15:32240568-32244662	-	1482	1.16831	1.2489e-53	529.035	1.16831	1.2489e-53	529.035	0	1	0	-	891	855	848	713	385	375	335	320	9.44604	9.46238	9.46734	9.33779	8.78123	8.77163	8.76429	8.76299	26.46	26.9328	27.2187	23.222	11.2927	11.2666	11.1141	11.0516
ENSMUSG00000087109	4930474H06Rik	chr12:71317620-71321660	-	1590	1.16719	1.69659e-08	77.7042	1.16719	1.69659e-08	77.7042	0	1	0	-	84	80	90	61	31	43	23	26	5.86468	5.86876	5.92991	5.77007	5.5322	5.62411	5.4953	5.53221	2.3251	2.34885	2.69256	1.85178	0.847521	1.20415	0.711228	0.836953
ENSMUSG00000037735	2810032G03Rik	chr12:5375869-5416630	+	3172	1.16673	0.000264753	35.7716	1.16673	0.000264753	35.7716	0	1	0	-	21	16	16	13	6	4	4	3	3.41306	3.37951	3.38136	3.35703	3.28361	3.26518	3.27047	3.26195	0.291371	0.235478	0.239943	0.197819	0.082225	0.0561483	0.0620019	0.0484075
ENSMUSG00000066842	Hmcn1	chr1:150563526-150993435	-	20188	1.16087	4.09572e-09	83.8767	1.16087	4.09572e-09	83.8767	0	1	0	-	75	88	92	89	26	37	36	37	5.92173	6.01959	6.04739	6.04268	5.60015	5.68783	5.71042	5.73157	0.163504	0.203494	0.216778	0.212792	0.0559843	0.0816053	0.0876774	0.0938065
ENSMUSG00000018126	Baiap2l2	chr15:79258194-79285537	-	2728	1.15995	1.48455e-12	118.284	1.15995	1.48455e-12	118.284	0	1	0	-	136	123	130	105	53	47	58	44	6.58706	6.56348	6.60217	6.49847	6.16755	6.13252	6.24387	6.16227	2.19409	2.10486	2.26683	1.85782	0.844535	0.767121	1.04535	0.82553
ENSMUSG00000047182	Irs3	chr5:137643031-137645714	-	2337	1.15854	0.000446819	33.4987	1.15854	0.000446819	33.4987	0	1	0	-	10	20	13	10	4	3	2	2	2.96657	3.06283	3.00174	2.97555	2.91077	2.9014	2.8947	2.89621	0.188322	0.399516	0.264609	0.206538	0.0744025	0.0571574	0.0420775	0.0438022
ENSMUSG00000042918	Mamstr	chr7:45639976-45646521	+	4877	1.15719	0.000473468	33.2471	1.15719	0.000473468	33.2471	0	1	0	-	10	14	13	15	1	5	4	0	2.92804	2.97082	2.96317	2.98473	2.8423	2.88274	2.87777	2.8348	0.0902416	0.13401	0.126798	0.148455	0.00891319	0.0456486	0.040326	0
ENSMUSG00000029408	Abcb9	chr5:124061529-124095798	-	5817	1.15514	3.46581e-08	74.602	1.15514	3.46581e-08	74.602	0	1	0	-	68	72	66	60	21	30	27	26	5.60052	5.64785	5.61721	5.58865	5.27813	5.35355	5.3545	5.35662	0.514481	0.577825	0.539716	0.497863	0.15693	0.229632	0.228214	0.22877
ENSMUSG00000030532	Hddc3	chr7:80343136-80346097	+	860	1.15505	1.05212e-22	219.779	1.15505	1.05212e-22	219.779	0	1	0	-	504	393	361	404	160	211	189	144	8.51315	8.361	8.30567	8.41288	7.71537	7.89225	7.88764	7.7495	25.7924	21.3333	19.9678	22.6747	8.08737	10.9243	10.8054	8.57015
ENSMUSG00000030701	Plekhb1	chr7:100642891-100662414	-	3554	1.15389	0.000493916	33.0635	1.15389	0.000493916	33.0635	0	1	0	-	19	19	5	14	3	5	2	1	3.10941	3.11824	2.98754	3.07798	2.96448	2.98493	2.95837	2.94853	0.235286	0.249574	0.0669226	0.190138	0.0366936	0.0626416	0.0276688	0.0144015
ENSMUSG00000027316	Gfra4	chr2:131039631-131043088	-	2165	1.15363	4.87877e-07	63.1169	1.15363	4.87877e-07	63.1169	0	1	0	-	61	72	61	56	32	14	21	28	5.47643	5.56581	5.50368	5.48002	5.28306	5.13711	5.21919	5.29083	1.24003	1.55252	1.34027	1.2485	0.642507	0.287926	0.476914	0.661949
ENSMUSG00000067279	Ppp1r3c	chr19:36731736-36736653	-	2719	1.1535	0.000465098	33.3246	1.1535	0.000465098	33.3246	0	1	0	-	16	13	18	13	2	8	3	0	3.19258	3.17306	3.22021	3.17745	3.06375	3.1231	3.07867	3.04659	0.258982	0.223202	0.314908	0.230777	0.0319747	0.131006	0.0542488	0
ENSMUSG00000028756	Pink1	chr4:138313408-138326307	-	2673	1.15114	3.52698e-31	304.526	1.15114	3.52698e-31	304.526	0	1	0	-	440	408	451	358	197	192	166	157	8.40762	8.39491	8.48632	8.32243	7.84533	7.83757	7.81216	7.80555	7.24458	7.12565	8.02598	6.4646	3.20371	3.19825	3.05343	3.00625
ENSMUSG00000038020	Rapgefl1	chr11:98836784-98853697	+	5677	1.14998	5.27254e-22	212.78	1.14998	5.27254e-22	212.78	-1.10423	1	0	chr11:98840256-98840336	294	261	242	236	106	109	108	115	7.74617	7.70268	7.65873	7.65802	7.12792	7.14857	7.19782	7.25492	2.27923	2.14627	2.02776	2.00655	0.811658	0.854905	0.93537	1.03682
ENSMUSG00000053175	Bcl3	chr7:19808461-19822770	-	2485	1.14891	8.80408e-63	620.553	1.14891	8.80408e-63	620.553	0	1	0	-	2125	2001	1762	1698	840	951	799	708	10.7048	10.7047	10.5996	10.5881	9.91003	10.021	9.96182	9.89997	37.635	37.591	33.7287	32.9814	14.694	17.0398	15.8088	14.5825
ENSMUSG00000021319	Sfrp4	chr13:19623174-19632821	+	1756	1.148	5.59336e-15	142.523	1.148	5.59336e-15	142.523	0	1	0	-	205	220	208	169	66	102	80	87	7.28205	7.36907	7.34012	7.21993	6.69844	6.89559	6.83051	6.89078	5.13794	5.84873	5.63455	4.64537	1.63382	2.58634	2.23998	2.53583
ENSMUSG00000000402	Egfl6	chrX:166523006-166585720	-	2704	1.14478	0.000535869	32.7094	1.14478	0.000535869	32.7094	0	1	0	-	12	15	17	9	3	4	4	0	2.9833	3.01655	3.03603	2.96464	2.90094	2.91124	2.91609	2.87393	0.195314	0.258969	0.299063	0.160655	0.0482281	0.0658663	0.072733	0
ENSMUSG00000021994	Wnt5a	chr14:28504749-28527447	+	7822	1.14308	9.19354e-84	830.365	1.14308	9.19354e-84	830.365	-1.04138	1.75641e-28	277.554	chr14:28504748-28506114	2468	2285	2366	2096	1031	1165	924	916	10.9492	10.9334	10.9792	10.8888	10.1966	10.3078	10.2006	10.2288	13.8863	13.6374	14.3886	12.934	5.72963	6.6316	5.80808	5.9938
ENSMUSG00000047787	Flrt1	chr19:7092013-7105729	-	5859	1.14083	9.86876e-25	240.057	1.14083	9.86876e-25	240.057	0	1	0	-	288	276	255	255	123	122	115	102	7.76605	7.7781	7.73095	7.7482	7.2404	7.24319	7.26753	7.22851	2.16336	2.19912	2.07032	2.10075	0.912573	0.927143	0.965056	0.891048
ENSMUSG00000023764	Sfi1	chr11:3131849-3193463	-	7559	1.14036	7.20523e-53	521.424	1.14036	7.20523e-53	521.424	-1.83948	8.32573e-33	320.796	chr11:3164556-3164713	981	834	841	766	419	383	351	340	9.5564	9.46601	9.48546	9.42532	8.87156	8.81526	8.82639	8.83515	5.71168	5.15068	5.29239	4.89128	2.40955	2.25603	2.28308	2.30218
ENSMUSG00000038777	Sema6c	chr3:95160456-95174024	+	5935	1.14013	9.38538e-14	130.275	1.14013	9.38538e-14	130.275	0	1	0	-	202	178	196	175	90	68	59	97	7.21656	7.1728	7.2444	7.18601	6.77248	6.65819	6.64624	6.88743	1.49793	1.40011	1.57093	1.42323	0.659186	0.510151	0.488776	0.836519
ENSMUSG00000032554	Trf	chr9:103204000-103230444	-	3310	1.1401	8.40467e-42	410.755	1.1401	8.40467e-42	410.755	0	1	0	-	4945	4695	4209	3543	1761	2247	1820	1722	11.9263	11.9343	11.843	11.7036	11.0132	11.23	11.1361	11.1259	65.7503	66.2172	60.4883	51.6655	23.1269	30.2263	27.0347	26.6275
ENSMUSG00000031698	Mylk3	chr8:85324302-85386345	-	4283	1.13796	2.00574e-08	76.9772	1.13796	2.00574e-08	76.9772	0	1	0	-	102	89	87	57	40	35	28	31	6.02418	5.98742	5.98313	5.81742	5.67542	5.6438	5.61734	5.65284	1.04812	0.970075	0.966255	0.642369	0.405974	0.363857	0.321431	0.370457
ENSMUSG00000074743	Thbd	chr2:148404470-148408188	-	3718	1.13627	1.34551e-60	598.711	1.13627	1.34551e-60	598.711	0	1	0	-	1374	1309	1217	1161	614	599	466	541	10.0858	10.0963	10.0428	10.0223	9.4149	9.40575	9.29217	9.43973	16.2644	16.4359	15.5705	15.0723	7.17869	7.17344	6.16247	7.44753
ENSMUSG00000043165	Lor	chr3:92080274-92083142	-	1775	1.13561	0.000133197	38.7551	1.13561	0.000133197	38.7551	0	1	0	-	24	29	17	30	7	8	10	7	4.05633	4.10851	4.00925	4.12501	3.90962	3.92029	3.95002	3.9234	0.595076	0.762716	0.455587	0.815794	0.17143	0.200679	0.277	0.201848
ENSMUSG00000036560	Lgi4	chr7:31059341-31070935	+	4584	1.1353	0.000560565	32.5137	1.1353	0.000560565	32.5137	0	1	0	-	21	16	14	7	4	2	4	3	3.1949	3.16054	3.14406	3.07875	3.04372	3.02429	3.04946	3.04064	0.20162	0.162944	0.145279	0.0737074	0.0379316	0.0194265	0.0429036	0.0334966
ENSMUSG00000006642	Tcf23	chr5:30968676-30977018	+	4101	1.13046	3.33866e-09	84.7643	1.13046	3.33866e-09	84.7643	0	1	0	-	109	74	83	99	37	44	31	37	6.16404	6.00877	6.06606	6.16313	5.75202	5.80591	5.73894	5.80002	1.16976	0.842374	0.96274	1.16521	0.392191	0.47772	0.371664	0.461782
ENSMUSG00000095440	Fignl2	chr15:101050193-101054399	-	4206	1.13013	2.21195e-13	126.552	1.13013	2.21195e-13	126.552	0	1	0	-	134	134	126	132	53	59	58	52	6.65219	6.68543	6.65819	6.69823	6.24234	6.28524	6.31888	6.29531	1.40215	1.4873	1.42502	1.51482	0.547763	0.624587	0.678012	0.632789
ENSMUSG00000028015	Ctso	chr3:81932600-81956725	+	4573	1.13002	2.90343e-16	155.371	1.13002	2.90343e-16	155.371	0	1	0	-	173	183	174	155	80	83	68	62	7.04607	7.11875	7.09515	7.03788	6.64786	6.66995	6.63004	6.61129	1.66496	1.86816	1.80996	1.63602	0.760457	0.808141	0.731116	0.693929
ENSMUSG00000022324	Matn2	chr15:34306679-34436242	+	3583	1.12987	5.2105e-33	322.831	1.12987	5.2105e-33	322.831	-1.22365	3.038e-07	65.1741	chr15:34306680-34306908	500	511	455	412	212	215	186	206	8.60198	8.66863	8.58501	8.52497	7.98901	8.0064	7.9805	8.07428	6.14162	6.6579	6.04067	5.55019	2.57202	2.67179	2.55238	2.94269
ENSMUSG00000029231	Pdgfra	chr5:75152290-75198204	+	6737	1.12877	3.87784e-41	404.114	1.12877	3.87784e-41	404.114	-1.72743	1.63834e-112	1117.86	chr5:75156168-75156352	5651	5474	5742	4755	2282	2899	2449	1879	12.1642	12.1914	12.2509	12.0939	11.3621	11.5781	11.5191	11.3313	36.9163	37.9316	40.5431	34.0676	14.7243	19.1598	17.8731	14.2753
ENSMUSG00000042010	Acacb	chr5:114146534-114250761	+	9632	1.12809	1.09905e-14	139.59	1.12809	1.09905e-14	139.59	0	1	0	-	164	171	173	135	78	76	61	59	6.95451	7.01672	7.03264	6.8963	6.57719	6.57188	6.52602	6.53117	0.749354	0.828787	0.854378	0.676511	0.352017	0.351324	0.311381	0.313516
ENSMUSG00000054196	Cthrc1	chr15:39076931-39087121	+	1480	1.12709	2.97406e-46	455.267	1.12709	2.97406e-46	455.267	0	1	0	-	679	691	710	658	346	307	275	279	9.10484	9.17068	9.20593	9.16147	8.58796	8.51268	8.50786	8.5485	20.1915	21.7961	22.8201	21.4596	10.1625	9.23606	9.13586	9.64866
ENSMUSG00000073293	Nudt10	chrX:6168695-6173015	-	1775	1.12677	1.9414e-07	67.1189	1.12677	1.9414e-07	67.1189	0	1	0	-	60	63	79	57	24	32	22	25	5.52674	5.56762	5.66862	5.54333	5.27704	5.34328	5.28539	5.32193	1.48769	1.65693	2.11714	1.55001	0.587758	0.802716	0.6094	0.720885
ENSMUSG00000031283	Chrdl1	chrX:143285673-143394262	-	6755	1.12662	1.75803e-06	57.5497	1.12662	1.75803e-06	57.5497	0	1	0	-	57	52	80	46	31	22	20	18	5.38241	5.37047	5.54888	5.34146	5.20608	5.13685	5.14042	5.13067	0.371372	0.359369	0.563359	0.328693	0.199491	0.145013	0.145574	0.136387
ENSMUSG00000007594	Hapln4	chr8:70083528-70090862	+	3576	1.12486	1.14215e-38	379.423	1.12486	1.14215e-38	379.423	-1.25591	0.312243	5.05507	chr8:70084416-70084544	759	693	674	661	289	340	338	257	9.20931	9.18248	9.17054	9.1747	8.47225	8.59479	8.66455	8.50202	9.34122	9.04688	8.96567	8.92199	3.51307	4.23342	4.64727	3.67841
ENSMUSG00000015405	Ace2	chrX:164139331-164188420	+	3762	1.12259	0.000709662	31.4895	1.12259	0.000709662	31.4895	0	1	0	-	15	15	11	8	1	3	4	2	2.90175	2.9089	2.87388	2.84717	2.77365	2.79384	2.80837	2.78854	0.175482	0.186138	0.13909	0.102643	0.0115549	0.0355069	0.0522781	0.0272105
ENSMUSG00000026664	Phyh	chr2:4919018-4938730	+	1893	1.12186	3.00584e-18	175.22	1.12186	3.00584e-18	175.22	0	1	0	-	293	278	306	224	132	147	96	102	7.79566	7.80048	7.88166	7.67423	7.29559	7.36327	7.19294	7.24602	6.81203	6.85579	7.68938	5.71157	3.03116	3.45762	2.49344	2.75787
ENSMUSG00000042293	Gm5617	chr9:48495344-48495964	+	620	1.12113	2.3709e-10	96.2509	1.12113	2.3709e-10	96.2509	0	1	0	-	117	108	97	89	43	46	34	48	6.33035	6.31878	6.27081	6.24026	5.92526	5.95022	5.8945	6.01479	8.30527	8.13196	7.44219	6.92877	3.01483	3.30352	2.69628	3.96254
ENSMUSG00000054619	Mettl7a1	chr15:100304816-100314348	+	1883	1.12109	1.30766e-20	198.835	1.12109	1.30766e-20	198.835	0	1	0	-	250	239	212	217	112	109	91	87	7.54228	7.55205	7.47902	7.51127	7.06529	7.05833	7.02157	7.02192	5.84318	5.92531	5.35557	5.56246	2.58555	2.57743	2.37613	2.3648
ENSMUSG00000053117	E330013P04Rik	chr19:60144688-60162260	+	1725	1.12096	3.26802e-22	214.857	1.12096	3.26802e-22	214.857	0	1	0	-	265	265	237	263	126	115	112	96	7.67763	7.71989	7.65043	7.74166	7.22363	7.18272	7.22374	7.168	6.76108	7.17166	6.53551	7.35909	3.17517	2.96838	3.19233	2.84844
ENSMUSG00000030123	Plxnd1	chr6:115954810-115995005	-	7192	1.12095	6.53093e-46	451.85	1.12095	6.53093e-46	451.85	0	1	0	-	770	802	740	708	335	359	354	287	9.27363	9.36085	9.30291	9.28579	8.6318	8.69046	8.75474	8.63581	4.71195	5.2058	4.89443	4.75162	2.0248	2.22257	2.42009	2.04248
ENSMUSG00000090084	Srpx	chrX:10037976-10117709	-	2652	1.11992	6.60593e-73	721.801	1.11992	6.60593e-73	721.801	0	1	0	-	1744	1612	1618	1489	707	816	714	635	10.4422	10.4251	10.4413	10.3875	9.68236	9.80686	9.78103	9.72245	28.9423	28.3762	29.0219	27.1006	11.5886	13.7002	13.2374	12.2553
ENSMUSG00000051177	Plcb1	chr2:134786158-135475258	+	8685	1.1184	0.000732338	31.3529	1.1184	0.000732338	31.3529	0	1	0	-	16	12	15	8	5	3	1	2	2.9706	2.94219	2.97099	2.90763	2.8731	2.85431	2.83688	2.84911	0.0810792	0.0645022	0.0821565	0.0444609	0.0250257	0.0153802	0.0056612	0.0117865
ENSMUSG00000078137	Ankrd63	chr2:118699102-118703963	-	4861	1.11802	0.000711667	31.4772	1.11802	0.000711667	31.4772	0	1	0	-	15	8	16	15	1	3	4	4	3.0631	3.00557	3.08103	3.07511	2.93484	2.95506	2.96978	2.97197	0.135808	0.0768294	0.156572	0.148944	0.00894253	0.0274793	0.0404588	0.0421172
ENSMUSG00000028023	Pitx2	chr3:129199877-129219591	+	3869	1.11734	2.0272e-42	416.931	1.11734	2.0272e-42	416.931	0	1	0	-	870	808	835	807	337	440	363	330	9.43697	9.42472	9.46555	9.45702	8.69973	8.90318	8.8359	8.79851	9.89646	9.74935	10.2662	10.0678	3.78632	5.06366	4.61303	4.36556
ENSMUSG00000002032	Tmem25	chr9:44793775-44799307	-	2902	1.11718	0.000115672	39.3677	1.11718	0.000115672	39.3677	0	1	0	-	28	25	22	26	9	7	10	8	4.12063	4.10862	4.086	4.12462	3.96167	3.94394	3.98318	3.96724	0.424639	0.402166	0.360617	0.432448	0.134813	0.107402	0.169426	0.141097
ENSMUSG00000032482	Cspg5	chr9:110243782-110262575	+	3870	1.11684	0.000136121	38.6608	1.11684	0.000136121	38.6608	0	1	0	-	27	31	25	25	6	11	14	5	4.19117	4.23548	4.1898	4.19469	4.01125	4.05966	4.10064	4.0135	0.307052	0.37395	0.307291	0.311808	0.0673948	0.126559	0.177867	0.0661277
ENSMUSG00000023960	Enpp5	chr17:44078812-44086567	+	4858	1.11638	1.42208e-55	548.471	1.11638	1.42208e-55	548.471	0	1	0	-	903	903	865	789	422	401	385	331	9.49557	9.54826	9.52257	9.46349	8.89061	8.86262	8.90803	8.82979	8.18069	8.67748	8.46992	7.8393	3.77608	3.67534	3.89656	3.48735
ENSMUSG00000028931	Kcnab2	chr4:152390741-152477871	-	5578	1.11549	2.61009e-14	135.833	1.11549	2.61009e-14	135.833	0	1	0	-	200	212	173	167	71	87	97	67	7.21916	7.29705	7.17256	7.16545	6.67983	6.77292	6.87485	6.72576	1.57801	1.77427	1.47533	1.44509	0.553307	0.694466	0.855011	0.614782
ENSMUSG00000001076	C1ql4	chr15:99084685-99087817	-	874	1.11507	0.000699504	31.5521	1.11507	0.000699504	31.5521	0	1	0	-	22	15	9	17	5	5	0	5	3.32963	3.27916	3.22518	3.30212	3.1827	3.18343	3.13608	3.19197	1.10782	0.801204	0.489837	0.938848	0.248682	0.254723	0	0.292808
ENSMUSG00000023017	Asic1	chr15:99670717-99701127	+	3763	1.1149	3.63239e-21	204.398	1.1149	3.63239e-21	204.398	0	1	0	-	448	395	340	328	176	204	159	122	8.35853	8.30552	8.19991	8.19104	7.70897	7.80888	7.71845	7.59328	5.23966	4.90034	4.29799	4.20724	2.03313	2.41383	2.0775	1.6594
ENSMUSG00000021185	9030617O03Rik	chr12:100779056-100896981	+	4434	1.11477	9.1377e-24	230.392	1.11477	9.1377e-24	230.392	0	1	0	-	481	378	356	454	209	201	167	156	8.48888	8.34493	8.30937	8.521	7.89322	7.87685	7.82658	7.8126	4.77429	3.97978	3.81922	4.94217	2.04897	2.01842	1.85182	1.80075
ENSMUSG00000041482	Piezo2	chr18:63010212-63387183	-	14566	1.11195	3.17129e-17	164.988	1.11195	3.17129e-17	164.988	0	1	0	-	218	202	227	182	84	106	89	81	7.36443	7.35295	7.4414	7.30932	6.84215	6.95796	6.9238	6.90097	0.658682	0.647402	0.741321	0.603099	0.250683	0.324023	0.300419	0.284623
ENSMUSG00000047875	Gpr157	chr4:150087364-150105927	+	4900	1.11031	3.29148e-07	64.8261	1.11031	3.29148e-07	64.8261	0	1	0	-	77	62	69	49	26	26	31	20	5.61763	5.55254	5.60107	5.48008	5.28451	5.2875	5.3532	5.26806	0.691599	0.590689	0.669844	0.482678	0.230655	0.236259	0.31106	0.20891
ENSMUSG00000021790	Dydc1	chr14:41072910-41092193	+	991	1.10956	0.000538615	32.6872	1.10956	0.000538615	32.6872	0	1	0	-	10	6	7	7	2	0	0	0	1.99987	1.96655	1.97712	1.97865	1.92555	1.90575	1.90662	1.907	0.444105	0.282645	0.336004	0.340943	0.0877288	0	0	0
ENSMUSG00000053040	Aph1c	chr9:66814993-66834726	-	5205	1.10835	7.93228e-06	51.006	1.10835	7.93228e-06	51.006	0	1	0	-	39	47	42	44	14	23	14	15	4.9057	4.97951	4.94813	4.96994	4.71023	4.78961	4.72766	4.74429	0.329764	0.421541	0.383839	0.408028	0.116921	0.196751	0.132247	0.147501
ENSMUSG00000006216	Clcnkb	chr4:141404352-141416014	-	2639	1.10833	0.000832125	30.7981	1.10833	0.000832125	30.7981	0	1	0	-	14	12	10	11	4	2	1	3	2.84918	2.83777	2.82045	2.83224	2.75908	2.73996	2.7323	2.75552	0.233479	0.212278	0.180252	0.201192	0.065888	0.0337443	0.0186311	0.0581844
ENSMUSG00000048794	Ccdc37	chr6:90403735-90428797	-	3854	1.1053	0.000149835	38.2439	1.1053	0.000149835	38.2439	0	1	0	-	35	17	35	25	10	11	8	9	4.29709	4.1634	4.31516	4.23989	4.0939	4.1046	4.08629	4.10113	0.399683	0.205921	0.431993	0.313102	0.112791	0.127084	0.10206	0.119524
ENSMUSG00000015134	Aldh1a3	chr7:66390891-66427517	-	4615	1.1048	0.000437583	33.5894	1.1048	0.000437583	33.5894	0	1	0	-	26	24	22	12	7	8	2	8	3.81072	3.80588	3.79175	3.70607	3.65103	3.66142	3.60812	3.67408	0.247948	0.242774	0.226763	0.125507	0.0659344	0.0771842	0.0213077	0.0887244
ENSMUSG00000001334	Fndc5	chr4:129136998-129144593	+	2763	1.10302	0.000900344	30.4559	1.10302	0.000900344	30.4559	0	1	0	-	9	16	7	9	2	2	2	1	2.56415	2.63396	2.55043	2.57208	2.49773	2.4981	2.50107	2.49104	0.143358	0.270335	0.120514	0.157224	0.0314655	0.0322299	0.03559	0.0185244
ENSMUSG00000036330	Slc18a1	chr8:69037710-69089235	-	5401	1.10273	0.000873135	30.5892	1.10273	0.000873135	30.5892	0	1	0	-	13	9	12	16	1	3	4	3	2.94116	2.91043	2.93991	2.97945	2.83017	2.8504	2.865	2.85622	0.105932	0.0777914	0.105688	0.142989	0.00804844	0.0247319	0.0364136	0.0284297
ENSMUSG00000042129	Rassf4	chr6:116633007-116673836	-	6344	1.10214	8.13346e-33	320.897	1.10214	8.13346e-33	320.897	-1.26028	1	0	chr6:116647568-116647712	537	470	547	468	250	254	195	204	8.7158	8.65587	8.79194	8.6833	8.15575	8.17521	8.07038	8.12767	3.72538	3.45858	4.10152	3.56074	1.71302	1.78271	1.5113	1.64586
ENSMUSG00000049404	Rarres1	chr3:67478885-67515523	-	1411	1.10186	0.000802053	30.958	1.10186	0.000802053	30.958	0	1	0	-	16	12	19	15	4	1	2	8	3.28169	3.25289	3.3183	3.28547	3.17257	3.14294	3.15689	3.224	0.49906	0.397025	0.640541	0.513124	0.123231	0.0315561	0.0696917	0.290193
ENSMUSG00000031451	Gas6	chr8:13465373-13494535	-	2593	1.10161	1.2852e-45	448.91	1.10161	1.2852e-45	448.91	0	1	0	-	2357	2418	2057	2076	958	1128	868	1030	10.8936	10.974	10.8359	10.8671	10.1227	10.2667	10.1356	10.3114	40.0052	43.5328	37.7357	38.644	16.0601	19.3694	16.4587	20.331
ENSMUSG00000027935	Rab13	chr3:90213694-90226385	+	1651	1.09799	4.39618e-33	323.569	1.09799	4.39618e-33	323.569	0	1	0	-	916	839	844	694	453	382	303	337	9.47788	9.45329	9.47067	9.3224	8.91076	8.79365	8.70209	8.80894	24.4179	23.7235	24.3173	20.2894	11.9272	10.3021	9.02348	10.4474
ENSMUSG00000018752	BC096441	chr11:69682576-69696098	-	2232	1.09721	1.45414e-36	358.374	1.09721	1.45414e-36	358.374	0	1	0	-	564	517	493	495	252	259	195	222	8.7733	8.75068	8.72304	8.74625	8.17936	8.20659	8.08905	8.20174	11.121	10.8133	10.5069	10.7046	4.90786	5.16673	4.29555	5.09077
ENSMUSG00000073002	Vamp5	chr6:72368048-72380468	-	1648	1.09605	2.31605e-18	176.353	1.09605	2.31605e-18	176.353	0	1	0	-	388	329	298	281	161	132	116	160	8.13706	8.05569	7.99184	7.96642	7.54282	7.43837	7.42619	7.63553	10.3618	9.3197	8.60161	8.23013	4.24673	3.56637	3.46082	4.96921
ENSMUSG00000026791	Slc2a8	chr2:32972989-32982083	-	2336	1.09411	1.71579e-21	207.655	1.09411	1.71579e-21	207.655	0	1	0	-	419	320	316	330	192	149	136	138	8.24901	8.08682	8.08772	8.1388	7.70375	7.56032	7.56818	7.60208	7.89407	6.395	6.4348	6.81866	3.57285	2.84003	2.86249	3.02365
ENSMUSG00000043687	1190005I06Rik	chr8:120608601-120647632	-	1083	1.09314	1.74473e-13	127.583	1.09314	1.74473e-13	127.583	0	1	0	-	244	203	160	167	82	96	72	86	7.37957	7.29415	7.15039	7.19201	6.76772	6.84602	6.7641	6.86492	9.91564	8.75046	7.02768	7.44296	3.29133	3.94687	3.26876	4.06438
ENSMUSG00000053965	Pde5a	chr3:122729157-122859374	+	6728	1.09179	3.30717e-16	154.805	1.09179	3.30717e-16	154.805	0	1	0	-	185	185	188	162	80	88	74	75	7.14307	7.18075	7.20002	7.12042	6.70421	6.75259	6.72266	6.74855	1.21017	1.28366	1.32921	1.16222	0.51688	0.582381	0.540784	0.570558
ENSMUSG00000019194	Scn1b	chr7:31116524-31126945	-	1514	1.09138	3.28447e-05	44.8353	1.09138	3.28447e-05	44.8353	0	1	0	-	54	65	35	33	22	13	14	21	5.08478	5.17531	4.97308	4.96384	4.85537	4.77935	4.80429	4.87815	1.56974	2.00424	1.09967	1.05207	0.631659	0.382321	0.454653	0.709934
ENSMUSG00000058135	Gstm1	chr3:108012254-108017973	-	1394	1.09106	5.86343e-25	242.318	1.09106	5.86343e-25	242.318	0	1	0	-	998	890	755	770	476	341	316	389	9.57367	9.52509	9.3938	9.43184	8.96995	8.7346	8.75366	8.93681	31.5085	29.8051	25.7635	26.6616	14.8433	10.8919	11.1456	14.2827
ENSMUSG00000042109	Csdc2	chr15:81936758-81950941	+	4623	1.09105	1.38025e-16	158.6	1.09105	1.38025e-16	158.6	0	1	0	-	554	521	511	422	277	215	148	245	8.72925	8.72772	8.7231	8.58763	8.21186	8.05214	7.89129	8.23682	5.27406	5.26111	5.25796	4.40602	2.60461	2.07074	1.57404	2.71248
ENSMUSG00000032057	4833427G06Rik	chr9:51081312-51102078	-	775	1.08853	0.000462731	33.3467	1.08853	0.000462731	33.3467	0	1	0	-	23	17	19	18	5	9	4	6	3.69872	3.65746	3.67722	3.6721	3.54152	3.58067	3.53834	3.56264	1.30613	1.02402	1.1662	1.12106	0.280449	0.517072	0.253768	0.396254
ENSMUSG00000032968	Inha	chr1:75507076-75510366	+	1475	1.08734	2.24943e-08	76.4793	1.08734	2.24943e-08	76.4793	0	1	0	-	85	101	74	73	36	38	29	37	5.96142	6.07177	5.93192	5.93635	5.66225	5.68066	5.63956	5.71686	2.53622	3.19663	2.38649	2.38885	1.06095	1.1471	0.966684	1.28391
ENSMUSG00000068744	Psrc1	chr3:108383838-108388231	+	3012	1.08675	7.35015e-32	311.337	1.08675	7.35015e-32	311.337	0	1	0	-	1107	955	795	974	462	439	373	448	9.73789	9.65955	9.51171	9.71111	9.02624	8.99786	8.95353	9.12345	16.1753	14.8017	12.5555	15.6085	6.66765	6.48963	6.08881	7.61286
ENSMUSG00000067642	Gpr113	chr5:30193430-30205722	-	3288	1.08666	0.000805866	30.9374	1.08666	0.000805866	30.9374	0	1	0	-	6	6	12	8	2	0	0	1	2.10116	2.10444	2.16262	2.12651	2.06332	2.04349	2.04445	2.05618	0.0803117	0.0851888	0.173608	0.11744	0.0264414	0	0	0.0155666
ENSMUSG00000031155	Pim2	chrX:7878261-7883432	+	2795	1.08593	1.88243e-13	127.253	1.08593	1.88243e-13	127.253	0	1	0	-	186	161	138	158	78	75	76	53	7.04217	6.9885	6.90448	7.00002	6.58694	6.57605	6.62732	6.50076	2.92881	2.6891	2.34865	2.72856	1.21311	1.19478	1.33693	0.970552
ENSMUSG00000028517	Ppap2b	chr4:105157346-105232764	+	3159	1.08463	1.22227e-20	199.128	1.08463	1.22227e-20	199.128	0	1	0	-	293	242	258	246	118	127	123	96	7.76374	7.66943	7.72442	7.70764	7.2038	7.2497	7.28892	7.18293	4.08204	3.57626	3.885	3.75875	1.62375	1.79005	1.91441	1.55541
ENSMUSG00000028262	Clca2	chr3:144796558-144819494	-	3863	1.08415	0.00112631	29.4834	1.08415	0.00112631	29.4834	0	1	0	-	12	9	8	10	2	1	2	2	2.53984	2.51773	2.50922	2.5305	2.44762	2.43796	2.45083	2.45211	0.136715	0.108763	0.0985112	0.124949	0.0225056	0.0115262	0.0254556	0.026499
ENSMUSG00000028024	Enpep	chr3:129269174-129332720	-	4706	1.08404	0.00100188	29.9918	1.08404	0.00100188	29.9918	0	1	0	-	18	17	20	9	9	1	3	3	3.33199	3.33177	3.35972	3.26229	3.25507	3.17906	3.20335	3.20533	0.168337	0.16864	0.202162	0.0923099	0.0831336	0.00946146	0.0313435	0.0326283
ENSMUSG00000098955	mmu-mir-6935	chr11:120347349-120347413	-	64	1.08401	1.05596e-06	59.7635	1.08401	1.05596e-06	59.7635	0	1	0	-	58	84	56	56	28	32	23	21	5.49976	5.67601	5.5133	5.5221	5.29448	5.32874	5.27959	5.27133	39.8848	61.2721	41.6225	42.2343	19.018	22.2628	17.6696	16.7944
ENSMUSG00000021913	Ogdhl	chr14:32322018-32347820	+	3449	1.0839	5.87226e-31	302.312	1.0839	5.87226e-31	302.312	0	1	0	-	524	470	435	411	212	239	187	192	8.63525	8.59505	8.54384	8.518	7.98407	8.07048	7.97888	8.02367	6.68648	6.36162	5.99952	5.75183	2.67195	3.08542	2.6658	2.84926
ENSMUSG00000035458	Tnni3	chr7:4518304-4524229	-	1928	1.07977	0.000360435	34.4317	1.07977	0.000360435	34.4317	0	1	0	-	32	31	32	18	18	11	4	5	4.27193	4.27789	4.28899	4.17564	4.16235	4.10172	4.04159	4.05565	0.73047	0.750616	0.789521	0.450633	0.405837	0.254036	0.102007	0.132736
ENSMUSG00000046417	Fam211a	chr11:62604883-62648523	-	2089	1.07975	9.68309e-38	370.14	1.07975	9.68309e-38	370.14	0	1	0	-	621	651	588	547	315	273	251	255	8.95611	9.04648	8.97202	8.93201	8.44255	8.35263	8.36565	8.40651	13.0832	14.5481	13.3893	12.6388	6.55478	5.81881	5.90763	6.24779
ENSMUSG00000036306	Lzts1	chr8:69132668-69184225	-	6993	1.07957	0.000889298	30.5095	1.07957	0.000889298	30.5095	0	1	0	-	14	11	16	21	5	3	4	5	3.30119	3.28048	3.32838	3.37669	3.21942	3.20034	3.21565	3.22897	0.0881098	0.0734332	0.108837	0.144948	0.0310808	0.0191015	0.0281239	0.0365958
ENSMUSG00000031970	Dbndd1	chr8:123504717-123515463	-	2645	1.07897	6.192e-11	102.082	1.07897	6.192e-11	102.082	-1.10271	0.374594	4.26439	chr8:123504720-123505688	152	136	118	102	53	56	53	58	6.69744	6.66647	6.59439	6.52992	6.21473	6.23876	6.25769	6.30854	2.52917	2.40036	2.12215	1.86137	0.871036	0.942698	0.985209	1.12235
ENSMUSG00000045287	Rtn4rl1	chr11:75193782-75267769	+	3525	1.07874	3.92921e-05	44.0569	1.07874	3.92921e-05	44.0569	0	1	0	-	39	43	44	26	19	14	12	13	4.74945	4.79477	4.806	4.67276	4.59736	4.55577	4.55137	4.56745	0.486928	0.569472	0.593764	0.356018	0.234304	0.176839	0.167379	0.18876
ENSMUSG00000055782	Abcd2	chr15:91145883-91191807	-	5527	1.07823	0.000875637	30.5768	1.07823	0.000875637	30.5768	0	1	0	-	17	17	17	13	8	5	4	1	3.36435	3.37262	3.37457	3.34091	3.28556	3.25771	3.25324	3.22212	0.135369	0.143589	0.146312	0.11353	0.0629197	0.0402801	0.0355835	0.00926052
ENSMUSG00000084822	Gm11768	chr11:120647669-120657061	+	1044	1.07619	0.000750142	31.2486	1.07619	0.000750142	31.2486	0	1	0	-	11	8	7	4	0	2	0	0	2.00022	1.97732	1.96859	1.93985	1.89717	1.91737	1.89814	1.89852	0.463716	0.357728	0.318947	0.184934	0	0.0852982	0	0
ENSMUSG00000072955	Tmsb15l	chrX:136954987-136976869	-	816	1.07511	1.5543e-05	48.0846	1.07511	1.5543e-05	48.0846	0	1	0	-	75	38	53	49	27	29	14	15	5.3886	5.17002	5.28063	5.26136	5.07391	5.09273	4.98323	5.00034	4.04511	2.17399	3.08963	2.89844	1.43833	1.58241	0.84356	0.940862
ENSMUSG00000097336	Fendrr	chr8:121054881-121083110	-	3322	1.07242	0.000867159	30.619	1.07242	0.000867159	30.619	0	1	0	-	12	23	14	17	4	5	5	5	3.38071	3.48472	3.40743	3.43826	3.30694	3.31748	3.32371	3.32648	0.15898	0.323215	0.20047	0.247006	0.0523415	0.0670163	0.0740029	0.0770362
ENSMUSG00000028463	Car9	chr4:43506965-43513729	+	2304	1.07231	8.31522e-12	110.801	1.07231	8.31522e-12	110.801	0	1	0	-	246	240	242	202	89	115	72	131	7.54203	7.56602	7.58148	7.47368	6.96505	7.09616	6.92657	7.24837	4.69907	4.86286	4.99636	4.23181	1.67917	2.22242	1.53649	2.91014
ENSMUSG00000045102	Poln	chr5:34007197-34169448	-	2897	1.07177	0.000193824	37.1259	1.07177	0.000193824	37.1259	0	1	0	-	29	22	24	29	8	10	9	10	4.18542	4.14129	4.16052	4.20628	4.0119	4.03154	4.0325	4.04716	0.440564	0.354517	0.394079	0.483178	0.12004	0.153696	0.152747	0.176675
ENSMUSG00000038637	Lrrc56	chr7:141194156-141210055	+	6068	1.07105	1.58009e-10	98.0132	1.07105	1.58009e-10	98.0132	0	1	0	-	136	107	107	115	53	58	39	53	6.55144	6.45312	6.4602	6.51132	6.13246	6.16913	6.07459	6.19148	0.9864	0.823192	0.838801	0.914766	0.379679	0.425591	0.316007	0.447049
ENSMUSG00000031840	Rab3a	chr8:70754678-70758677	+	2226	1.07037	3.14873e-22	215.019	1.07037	3.14873e-22	215.019	0	1	0	-	360	316	295	278	137	158	127	142	8.06232	8.00841	7.96747	7.94167	7.43436	7.52269	7.45797	7.54677	7.11765	6.62712	6.30402	6.02806	2.67536	3.1604	2.80516	3.26503
ENSMUSG00000086268	Gm11670	chr11:108939309-108942015	-	511	1.06954	0.00129612	28.8736	1.06954	0.00129612	28.8736	0	1	0	-	13	11	9	8	1	5	0	1	2.59238	2.58032	2.56271	2.5549	2.48167	2.5213	2.47312	2.48496	1.11965	1.00493	0.837803	0.755661	0.0850678	0.435672	0	0.100162
ENSMUSG00000052353	9930013L23Rik	chr7:83932856-84086502	-	12232	1.06914	7.75863e-11	101.102	1.06914	7.75863e-11	101.102	0	1	0	-	5452	4916	4901	5622	2029	2718	2740	1691	12.1115	12.0703	12.0806	12.2361	11.242	11.5007	11.5963	11.2218	19.6163	18.7619	19.0593	22.1846	7.21059	9.89378	11.0137	7.07572
ENSMUSG00000025175	Fn3k	chr11:121434912-121450491	+	4399	1.06865	0.00116606	29.3328	1.06865	0.00116606	29.3328	0	1	0	-	8	9	14	7	0	1	4	0	2.40656	2.42033	2.46802	2.40368	2.33027	2.34053	2.37462	2.3321	0.0800379	0.0955106	0.151389	0.0768072	0	0.0101218	0.0447079	0
ENSMUSG00000015568	Lpl	chr8:68880490-68907448	+	6810	1.06788	2.6773e-59	585.723	1.06788	2.6773e-59	585.723	0	1	0	-	10440	9170	9517	8441	4279	5106	4296	3632	13.0346	12.9677	13.0169	12.9252	12.2325	12.3975	12.3343	12.2265	67.4703	62.8616	66.4773	59.828	27.3137	33.3844	31.0167	27.2975
ENSMUSG00000028211	Trp53inp1	chr4:11156430-11174379	+	6475	1.06779	4.94405e-16	153.059	1.06779	4.94405e-16	153.059	-1.45891	0.00806649	20.9332	chr4:11165089-11166400	357	231	335	269	139	144	132	119	8.01516	7.7423	8.02215	7.8765	7.39934	7.42655	7.43624	7.40367	2.42654	1.66546	2.46108	2.00526	0.933171	0.990223	1.00233	0.940658
ENSMUSG00000028088	Fmo5	chr3:97628803-97655282	+	5675	1.06745	1.92307e-06	57.16	1.06745	1.92307e-06	57.16	-1.11238	1	0	chr3:97637480-97637640	78	75	77	48	43	25	27	20	5.71521	5.72317	5.74057	5.56533	5.50339	5.37138	5.41234	5.36069	0.604907	0.616962	0.645424	0.408257	0.329373	0.196148	0.233925	0.18038
ENSMUSG00000032607	Amt	chr9:108296852-108301571	+	1706	1.06682	1.81684e-09	87.4068	1.06682	1.81684e-09	87.4068	0	1	0	-	104	106	97	90	39	41	51	41	6.25274	6.29207	6.25384	6.22871	5.88056	5.89883	6.00356	5.94595	2.68296	2.90061	2.70466	2.54637	0.993737	1.07008	1.46984	1.23007
ENSMUSG00000024854	Pold4	chr19:4231898-4233631	+	910	1.06651	3.4947e-24	234.566	1.06651	3.4947e-24	234.566	0	1	0	-	448	404	365	322	188	171	171	168	8.38606	8.35109	8.2825	8.20542	7.77936	7.73013	7.79294	7.80933	21.6669	20.7254	19.0797	17.0794	8.98054	8.36691	9.23917	9.44915
ENSMUSG00000001751	Naglu	chr11:101070011-101077672	+	2658	1.06635	1.77237e-52	517.514	1.06635	1.77237e-52	517.514	0	1	0	-	1324	1240	1088	1096	543	615	517	509	10.0287	10.0237	9.9187	9.94704	9.29412	9.40063	9.34469	9.36635	21.9226	21.7786	19.4713	19.9028	8.88037	10.3022	9.56344	9.80138
ENSMUSG00000001986	Gria3	chrX:41400853-41678601	+	9859	1.06618	1.18799e-48	479.252	1.06618	1.18799e-48	479.252	0	1	0	-	938	791	859	772	422	421	359	345	9.52026	9.4237	9.5077	9.43579	8.88132	8.88925	8.8473	8.85029	4.18726	3.74547	4.14458	3.77957	1.86065	1.90134	1.79036	1.79106
ENSMUSG00000020182	Ddc	chr11:11814100-11898144	-	4461	1.06515	5.94537e-36	352.258	1.06515	5.94537e-36	352.258	0	1	0	-	2730	2292	2112	2302	1272	1105	859	1092	11.066	10.9583	10.8954	10.9982	10.3954	10.2893	10.1681	10.3994	26.9333	23.9853	22.5207	24.9075	12.3948	11.0291	9.46759	12.529
ENSMUSG00000030022	Adamts9	chr6:92772698-92943492	-	12527	1.06348	8.19882e-50	490.862	1.06348	8.19882e-50	490.862	-1.25686	1.97336e-30	297.048	chr6:92890112-92890288	1200	1253	1322	1123	571	620	558	512	9.95941	10.0522	10.1136	9.98808	9.3541	9.42817	9.4253	9.39232	4.21593	4.66947	5.02001	4.32704	1.98141	2.20371	2.19011	2.09193
ENSMUSG00000040943	Tet2	chr3:133463678-133544390	-	9179	1.06214	1.4874e-10	98.2757	1.06214	1.4874e-10	98.2757	0	1	0	-	142	173	164	163	51	82	70	79	6.88139	7.03616	7.01111	7.02219	6.42825	6.61677	6.59393	6.66725	0.680852	0.879861	0.849902	0.857136	0.241524	0.397767	0.374957	0.440511
ENSMUSG00000025496	Drd4	chr7:141292005-141294999	+	1334	1.0613	1.03616e-12	119.846	1.0613	1.03616e-12	119.846	0	1	0	-	192	179	164	194	66	99	92	68	7.18022	7.17306	7.12656	7.24999	6.63885	6.82149	6.8363	6.7196	6.33439	6.26412	5.84802	7.01946	2.15067	3.30438	3.39086	2.60902
ENSMUSG00000025892	Gria4	chr9:4417898-4796234	-	6146	1.06018	1.43905e-19	188.419	1.06018	1.43905e-19	188.419	-1.12662	1.01949e-05	49.9162	chr9:4502373-4502478	296	270	297	287	127	163	130	104	7.85578	7.83222	7.91193	7.9044	7.33039	7.47866	7.40767	7.31239	2.11962	2.05085	2.29871	2.25396	0.89825	1.18088	1.03999	0.866095
ENSMUSG00000027318	Adam33	chr2:131050590-131063814	-	5394	1.0591	5.36532e-05	42.704	1.0591	5.36532e-05	42.704	-1.41671	1	0	chr2:131053680-131054360	62	55	47	35	28	15	9	25	5.21986	5.19651	5.14664	5.06494	4.98918	4.88283	4.84086	5.00006	0.505872	0.476009	0.414484	0.313195	0.225649	0.12382	0.082037	0.237221
ENSMUSG00000046668	Cxxc5	chr18:35829817-35861687	+	2271	1.05788	5.03114e-35	342.983	1.05788	5.03114e-35	342.983	0	1	0	-	653	584	510	572	276	284	253	255	8.9784	8.93463	8.83411	8.94919	8.32961	8.35813	8.34946	8.385	12.6548	12.0049	10.6825	12.1573	5.28297	5.56816	5.47749	5.74709
ENSMUSG00000043613	Mmp3	chr9:7445821-7455972	+	1798	1.05754	1.36676e-11	108.643	1.05754	1.36676e-11	108.643	0	1	0	-	209	156	184	139	100	71	63	72	7.17975	7.0313	7.14349	6.98504	6.76327	6.61623	6.61193	6.68658	5.11583	4.0504	4.86798	3.73149	2.41767	1.75824	1.72278	2.04959
ENSMUSG00000048636	A730049H05Rik	chr6:92816477-92847174	+	3739	1.05727	1.01819e-10	99.9217	1.05727	1.01819e-10	99.9217	0	1	0	-	110	129	135	128	55	66	55	47	6.51903	6.63652	6.6702	6.65325	6.22795	6.30072	6.2716	6.23232	1.29478	1.61064	1.71751	1.65239	0.63943	0.785957	0.723245	0.643379
ENSMUSG00000020034	Tcp11l2	chr10:84576625-84614359	+	3438	1.0567	6.7938e-10	91.6789	1.0567	6.7938e-10	91.6789	0	1	0	-	125	123	139	105	50	68	60	39	6.56126	6.58457	6.66186	6.51971	6.16989	6.28694	6.27877	6.14661	1.60016	1.67018	1.92322	1.47415	0.632194	0.88067	0.858072	0.580608
ENSMUSG00000020135	Apc2	chr10:80295976-80318263	+	11281	1.05609	3.00842e-07	65.2166	1.05609	3.00842e-07	65.2166	0	1	0	-	62	67	73	70	32	30	23	31	5.62281	5.67613	5.71762	5.70969	5.42434	5.41233	5.37923	5.45844	0.241882	0.277262	0.307819	0.299508	0.123307	0.118409	0.100244	0.14065
ENSMUSG00000087541	Gm15830	chr5:77094531-77102303	+	1661	1.05595	2.06338e-05	46.8542	1.05595	2.06338e-05	46.8542	0	1	0	-	56	49	41	38	22	26	11	15	5.10776	5.08134	5.02891	5.0135	4.86683	4.90212	4.78698	4.83285	1.48381	1.37718	1.17418	1.10426	0.575757	0.69697	0.325613	0.462217
ENSMUSG00000044080	S100a1	chr3:90511033-90514392	-	694	1.05547	1.09159e-34	339.619	1.05547	1.09159e-34	339.619	0	1	0	-	935	890	810	743	380	460	399	321	9.52043	9.52972	9.45934	9.40579	8.80792	8.95916	8.92859	8.80173	59.2941	59.8679	55.5196	51.6758	23.8018	29.5127	28.2678	23.6739
ENSMUSG00000029371	Cxcl5	chr5:90759298-90761625	+	1655	1.05474	4.79838e-36	353.189	1.05474	4.79838e-36	353.189	0	1	0	-	4516	3898	4226	3923	2310	2255	1708	1443	11.8302	11.7478	11.8377	11.7902	11.2324	11.2227	11.0719	10.9682	120.092	109.953	121.465	114.414	60.6736	60.6679	50.7421	44.6265
ENSMUSG00000085260	1700013G23Rik	chr11:59946888-59948142	-	527	1.05469	0.000461604	33.3573	1.05469	0.000461604	33.3573	0	1	0	-	26	22	24	18	11	9	4	7	3.95717	3.93556	3.95498	3.90699	3.83247	3.81527	3.77341	3.80855	2.17131	1.94884	2.16631	1.64862	0.907336	0.7604	0.373188	0.679848
ENSMUSG00000084896	Gm11632	chr11:98084456-98085424	-	674	1.05324	2.33676e-05	46.3139	1.05324	2.33676e-05	46.3139	0	1	0	-	47	41	58	34	15	21	18	18	5.02802	5.00381	5.12503	4.96147	4.78587	4.83978	4.83229	4.84027	3.069	2.8398	4.09344	2.43488	0.967425	1.3873	1.31308	1.3669
ENSMUSG00000037493	Cib2	chr9:54544793-54560218	-	1433	1.05312	2.16385e-08	76.6477	1.05312	2.16385e-08	76.6477	0	1	0	-	204	230	225	190	109	80	52	127	7.33381	7.45481	7.449	7.35084	6.97765	6.83873	6.71485	7.14663	6.26532	7.49281	7.4689	6.39978	3.30648	2.48573	1.78417	4.5361
ENSMUSG00000052726	Kcnt2	chr1:140246215-140612063	+	6276	1.05304	1.36457e-06	58.65	1.05304	1.36457e-06	58.65	0	1	0	-	60	68	52	55	24	31	23	21	5.44044	5.51169	5.4147	5.44339	5.19134	5.24969	5.208	5.1996	0.420754	0.505812	0.394131	0.422997	0.166232	0.219932	0.180187	0.171262
ENSMUSG00000060594	Layn	chr9:51056779-51077094	-	1786	1.05273	9.50067e-16	150.222	1.05273	9.50067e-16	150.222	0	1	0	-	285	276	277	234	163	108	98	118	7.77119	7.79083	7.80344	7.7002	7.41211	7.19426	7.19925	7.31909	7.023	7.21424	7.37766	6.324	3.96727	2.69248	2.69788	3.38162
ENSMUSG00000089996	Tmsb15b2	chrX:136955264-136975497	-	550	1.05209	3.00395e-05	45.2231	1.05209	3.00395e-05	45.2231	0	1	0	-	75	36	52	49	27	29	14	15	5.37689	5.14325	5.26215	5.24962	5.0622	5.08101	4.97146	4.98854	6.00148	3.05565	4.4974	4.30022	2.13396	2.34772	1.25154	1.3959
ENSMUSG00000034959	5031414D18Rik	chr14:75016026-75052532	+	2651	1.05207	0.000574508	32.407	1.05207	0.000574508	32.407	0	1	0	-	22	24	17	20	9	8	4	7	3.81593	3.84265	3.78535	3.8155	3.70623	3.69811	3.66597	3.70046	0.365235	0.422634	0.305042	0.364148	0.147577	0.134366	0.0741871	0.135149
ENSMUSG00000029163	Emilin1	chr5:30913401-30921278	+	4938	1.05125	3.78873e-06	54.2151	1.05125	3.78873e-06	54.2151	0	1	0	-	579	553	510	441	285	187	128	265	8.76995	8.78132	8.72536	8.62656	8.23471	7.96813	7.81423	8.2951	5.16044	5.22802	4.91292	4.31067	2.50888	1.68617	1.27449	2.74675
ENSMUSG00000078716	Tmem8b	chr4:43668970-43692668	+	5553	1.05052	3.9377e-10	94.0476	1.05052	3.9377e-10	94.0476	-1.24857	0.116965	9.31945	chr4:43669556-43670032	123	153	136	112	51	66	51	64	6.61658	6.77512	6.71333	6.61825	6.2412	6.33965	6.28364	6.3876	0.974848	1.28625	1.16502	0.973527	0.399235	0.529208	0.451566	0.589898
ENSMUSG00000023904	Hcfc1r1	chr17:23673595-23675227	+	958	1.05043	2.27616e-66	656.428	1.05043	2.27616e-66	656.428	0	1	0	-	3674	3534	3050	2933	1668	1631	1392	1459	11.5228	11.5431	11.4172	11.4035	10.8259	10.8179	10.7699	10.8457	168.785	172.212	151.445	147.776	75.6862	75.8051	71.4417	77.9497
ENSMUSG00000022453	Naga	chr15:82329531-82338826	-	1913	1.05041	3.51093e-50	494.546	1.05041	3.51093e-50	494.546	0	1	0	-	1120	1109	942	989	536	487	451	462	9.8062	9.8511	9.71838	9.78294	9.20392	9.14078	9.15992	9.21151	25.7669	27.0632	23.4238	24.9539	12.1797	11.3351	11.5915	12.3609
ENSMUSG00000023795	Pisd-ps2	chr17:3076577-3084183	-	2108	1.05006	2.51719e-29	285.991	1.05006	2.51719e-29	285.991	0	1	0	-	419	398	390	367	186	202	181	159	8.35626	8.36261	8.35749	8.32895	7.79752	7.85704	7.85292	7.8007	8.74788	8.81405	8.80064	8.40336	3.83556	4.26669	4.22169	3.86057
ENSMUSG00000075702	Selm	chr11:3514683-3517351	+	1481	1.04955	1.95073e-61	607.098	1.04955	1.95073e-61	607.098	0	1	0	-	3250	2869	2571	2680	1487	1399	1156	1263	11.3313	11.2703	11.1808	11.2424	10.6421	10.6017	10.5276	10.6371	96.5801	90.4354	82.5786	87.3449	43.6457	42.0603	38.3779	43.6489
ENSMUSG00000073889	Il11ra1	chr4:41699988-41769474	+	4471	1.04902	8.48735e-26	250.712	1.04902	8.48735e-26	250.712	0	1	0	-	688	634	497	501	273	278	263	253	9.02087	9.00202	8.8112	8.83755	8.3202	8.34148	8.37395	8.37754	6.77241	6.61984	5.28777	5.40867	2.65426	2.76854	2.89221	2.89628
ENSMUSG00000038260	Trpm4	chr7:45303154-45333780	-	4245	1.04679	2.33393e-23	226.319	1.04679	2.33393e-23	226.319	-1.17079	1	0	chr7:45327720-45327896	456	363	369	325	181	178	177	160	8.39227	8.25961	8.28293	8.20436	7.74799	7.74592	7.80598	7.77123	4.72766	3.99201	4.13494	3.69542	1.85348	1.86704	2.05009	1.92915
ENSMUSG00000021884	Hacl1	chr14:31552904-31641286	-	5123	1.04532	2.59873e-16	155.852	1.04532	2.59873e-16	155.852	0	1	0	-	216	228	190	189	95	105	87	89	7.36999	7.44665	7.33347	7.34576	6.911	6.96588	6.92589	6.95824	1.85562	2.07766	1.76421	1.78072	0.806093	0.912589	0.834975	0.889181
ENSMUSG00000015452	Ager	chr17:34597861-34600936	+	2141	1.04408	1.20376e-08	79.1946	1.04408	1.20376e-08	79.1946	0	1	0	-	100	79	92	82	40	39	35	41	6.11744	6.03442	6.11161	6.0683	5.77149	5.76828	5.76876	5.82883	2.05562	1.72256	2.04405	1.84865	0.812137	0.81107	0.803766	0.980148
ENSMUSG00000035948	Acss3	chr10:106936163-107123668	-	4549	1.04327	0.000595472	32.2514	1.04327	0.000595472	32.2514	0	1	0	-	6	10	7	2	0	0	0	0	1.61038	1.65169	1.62405	1.57447	1.55267	1.55276	1.55344	1.55374	0.058049	0.102624	0.0731986	0.0212213	0	0	0	0
ENSMUSG00000021268	Meg3	chr12:109541000-109571726	+	18089	1.04276	6.40283e-39	381.936	1.04276	6.40283e-39	381.936	0	1	0	-	2863	2733	2506	2061	1175	1307	1229	1023	11.153	11.166	11.0974	10.9391	10.3784	10.4774	10.5107	10.3942	6.96573	7.05323	6.59002	5.49947	2.82364	3.21715	3.34053	2.89458
ENSMUSG00000087439	Gm15788	chr5:110262160-110277267	+	931	1.04233	1.66046e-05	47.7977	1.04233	1.66046e-05	47.7977	0	1	0	-	55	58	69	50	31	29	27	9	5.37922	5.41952	5.4935	5.37931	5.21607	5.20372	5.21185	5.05217	2.6	2.90832	3.52549	2.59226	1.44743	1.38694	1.42591	0.494786
ENSMUSG00000042436	Mfap4	chr11:61485430-61488900	+	1922	1.04197	7.22242e-08	71.4132	1.04197	7.22242e-08	71.4132	0	1	0	-	130	82	112	79	52	52	34	38	6.37725	6.17392	6.33481	6.17418	5.97551	5.98011	5.88405	5.92905	2.9768	1.9917	2.77195	1.98395	1.17608	1.20465	0.869769	1.01194
ENSMUSG00000050315	Synpo2	chr3:123076518-123236149	-	9403	1.04023	7.16848e-09	81.4457	1.04023	7.16848e-09	81.4457	0	1	0	-	94	98	93	89	41	54	37	34	6.14921	6.19788	6.17871	6.16889	5.84053	5.93264	5.84667	5.83631	0.439968	0.486545	0.470475	0.456858	0.189541	0.255704	0.19347	0.18507
ENSMUSG00000073719	Vps13d	chr4:144972622-144974683	-	2061	1.03944	2.35676e-09	86.2769	1.03944	2.35676e-09	86.2769	0	1	0	-	103	122	134	99	51	57	43	53	6.39764	6.51717	6.57766	6.42637	6.11323	6.1566	6.09801	6.18521	2.19947	2.76341	3.09277	2.31854	1.07567	1.23142	1.02581	1.3162
ENSMUSG00000024039	Cbs	chr17:31612622-31637199	-	3343	1.03883	2.81647e-05	45.5029	1.03883	2.81647e-05	45.5029	0	1	0	-	52	36	41	38	19	21	15	13	4.97447	4.88203	4.92236	4.90717	4.7384	4.75725	4.72218	4.70988	0.684584	0.502724	0.583402	0.548662	0.24706	0.2797	0.220614	0.199036
ENSMUSG00000028957	Per3	chr4:151003651-151044665	-	9608	1.03858	1.17469e-13	129.301	1.03858	1.17469e-13	129.301	-1.32634	1	0	chr4:151017904-151018064	205	219	205	197	77	92	107	99	7.33815	7.42183	7.38639	7.37586	6.81988	6.90461	7.03079	7.01353	0.939032	1.06408	1.01494	0.989671	0.348372	0.426349	0.547557	0.527384
ENSMUSG00000032243	Itga11	chr9:62677825-62783982	+	5131	1.03739	0.000111655	39.5212	1.03739	0.000111655	39.5212	0	1	0	-	27	34	36	36	15	12	11	14	4.51565	4.58268	4.60114	4.60737	4.42019	4.39555	4.39887	4.4338	0.231591	0.309343	0.33375	0.338656	0.127079	0.104133	0.105407	0.139653
ENSMUSG00000086032	Gm15929	chr7:3666251-3670278	+	1161	1.03682	3.86729e-06	54.1259	1.03682	3.86729e-06	54.1259	0	1	0	-	75	67	58	42	27	29	20	26	5.55623	5.53318	5.4819	5.37962	5.24255	5.26138	5.20869	5.27169	2.84308	2.69405	2.37638	1.74612	1.01092	1.11218	0.846986	1.14621
ENSMUSG00000041642	Kif21b	chr1:136131388-136177998	+	10813	1.03645	5.67466e-30	292.461	1.03645	5.67466e-30	292.461	0	1	0	-	446	475	455	409	222	229	195	189	8.49657	8.59491	8.57124	8.50544	8.00493	8.03366	7.9966	8.00493	1.8153	2.05074	2.00164	1.82572	0.892468	0.942973	0.88668	0.894623
ENSMUSG00000021087	Rtn1	chr12:72211751-72409054	-	4003	1.03624	7.3696e-22	211.326	1.03624	7.3696e-22	211.326	0	1	0	-	506	445	463	418	255	231	154	212	8.61097	8.55534	8.59841	8.53579	8.10982	8.0527	7.86704	8.09293	5.5632	5.18964	5.50194	5.04021	2.76911	2.56943	1.89153	2.71066
ENSMUSG00000041126	H2afv	chr11:6427228-6444443	-	1633	1.03445	6.28029e-45	442.02	1.03445	6.28029e-45	442.02	0	1	0	-	2451	2203	2038	1889	1084	1068	850	1026	10.9218	10.8782	10.8188	10.7714	10.2137	10.2121	10.1092	10.2989	66.0567	62.9784	59.3661	55.8346	28.8555	29.1203	25.5924	32.1578
ENSMUSG00000096974	Gm26881	chr4:43046033-43053253	+	592	1.03391	0.00154496	28.1108	1.03391	0.00154496	28.1108	0	1	0	-	20	16	12	11	5	6	3	3	3.28604	3.26057	3.22603	3.21917	3.15529	3.16561	3.14092	3.14286	1.48685	1.26172	0.964229	0.896868	0.367142	0.451273	0.24916	0.259373
ENSMUSG00000071711	Mpst	chr15:78406711-78414002	+	1509	1.03351	9.07933e-45	440.419	1.03351	9.07933e-45	440.419	0	1	0	-	1009	925	828	836	468	445	372	408	9.63118	9.60725	9.52242	9.55204	9.00999	8.98189	8.92517	9.02616	29.428	28.6164	26.1013	26.7408	13.4816	13.1305	12.1208	13.8387
ENSMUSG00000045594	Glb1	chr9:114401075-114474376	+	2395	1.03254	2.51835e-63	625.989	1.03254	2.51835e-63	625.989	0	1	0	-	1811	1730	1584	1527	877	790	711	763	10.5077	10.5209	10.4527	10.4416	9.8897	9.81594	9.813	9.90475	33.2792	33.7213	31.4608	30.7745	15.9177	14.687	14.5963	16.3059
ENSMUSG00000024866	Acy3	chr19:3986660-3990007	+	1505	1.03102	5.20132e-16	152.839	1.03102	5.20132e-16	152.839	0	1	0	-	216	231	212	197	108	96	86	105	7.407	7.49268	7.44332	7.41029	7.01113	6.96036	6.95878	7.07961	6.3165	7.16537	6.7007	6.31811	3.11942	2.84017	2.80957	3.5709
ENSMUSG00000071604	Fam189a2	chr19:23972750-24031019	-	2547	1.03014	1.08431e-06	59.6485	1.03014	1.08431e-06	59.6485	0	1	0	-	75	64	66	62	41	32	23	20	5.67771	5.63656	5.65428	5.63868	5.46923	5.4067	5.35811	5.3409	1.29596	1.17304	1.23264	1.17495	0.699747	0.559411	0.443994	0.401907
ENSMUSG00000050671	Ism2	chr12:87278637-87299705	-	2600	1.02998	0.00126104	28.9927	1.02998	0.00126104	28.9927	0	1	0	-	19	26	16	13	5	3	7	8	3.61506	3.6835	3.59959	3.57492	3.49035	3.47132	3.51857	3.53269	0.321618	0.466835	0.29273	0.241339	0.0835955	0.0513757	0.132374	0.157486
ENSMUSG00000037605	Lphn3	chr5:81020137-81825133	+	13291	1.02947	3.35751e-07	64.7398	1.02947	3.35751e-07	64.7398	-1.54929	0.06029	12.1975	chr5:81511976-81512784	78	80	86	87	43	51	29	23	5.93107	5.96799	6.00739	6.02401	5.72013	5.77875	5.64747	5.60718	0.258283	0.280993	0.307795	0.315951	0.140636	0.170853	0.10728	0.0885717
ENSMUSG00000024924	Vldlr	chr19:27216483-27254231	+	10068	1.02872	2.83505e-18	175.474	1.02872	2.83505e-18	175.474	0	1	0	-	487	481	532	427	193	277	246	180	8.61456	8.65281	8.74711	8.58764	7.96752	8.21172	8.20022	8.02493	2.12885	2.23031	2.51356	2.04712	0.833298	1.22503	1.20135	0.915069
ENSMUSG00000006360	Crip1	chr12:113152011-113153877	+	445	1.02816	1.39518e-30	298.554	1.02816	1.39518e-30	298.554	0	1	0	-	4624	3992	3438	3520	1939	1927	1466	1961	11.825	11.742	11.6142	11.6593	11.0498	11.0555	10.9116	11.1947	457.317	418.788	367.508	381.804	189.41	192.811	161.977	225.55
ENSMUSG00000059213	Ddn	chr15:98803781-98807925	-	3740	1.02759	0.000710827	31.4824	1.02759	0.000710827	31.4824	0	1	0	-	19	21	20	23	8	6	7	8	3.8124	3.83871	3.83248	3.8623	3.71787	3.70009	3.71775	3.73179	0.223584	0.262126	0.254378	0.296834	0.0929832	0.0714315	0.0920248	0.109482
ENSMUSG00000018861	Fdxr	chr11:115268023-115277050	-	2806	1.02734	2.92411e-29	285.34	1.02734	2.92411e-29	285.34	0	1	0	-	905	772	670	636	397	358	329	316	9.42049	9.33372	9.22417	9.20082	8.76168	8.69588	8.70885	8.71142	14.1945	12.8438	11.3582	10.9402	6.15019	5.68075	5.76483	5.764
ENSMUSG00000031636	Pdlim3	chr8:45885484-45919546	+	1578	1.02713	0.00190037	27.2116	1.02713	0.00190037	27.2116	0	1	0	-	5	11	9	8	2	1	1	1	2.21322	2.2736	2.25594	2.24807	2.1848	2.17511	2.17696	2.17779	0.139451	0.325423	0.271304	0.244704	0.0550946	0.0282165	0.0311581	0.0324353
ENSMUSG00000085624	Gm14573	chr6:91158712-91159256	-	451	1.02635	0.00124996	29.031	1.02635	0.00124996	29.031	0	1	0	-	11	5	3	10	0	1	0	1	1.96298	1.91088	1.89135	1.96213	1.85976	1.86998	1.8607	1.87238	1.07343	0.517555	0.316421	1.07024	0	0.0987265	0	0.113488
ENSMUSG00000028497	Ptplad2	chr4:88396143-88438928	-	6756	1.02468	1.05625e-73	729.762	1.02468	1.05625e-73	729.762	0	1	0	-	1836	1684	1674	1546	845	857	728	774	10.5293	10.5051	10.5124	10.462	9.86979	9.89167	9.84216	9.92657	11.9603	11.6363	11.7865	11.0453	5.43692	5.64809	5.2981	5.86376
ENSMUSG00000003812	Dnase2a	chr8:84908559-84922915	+	5389	1.02393	1.74617e-40	397.579	1.02393	1.74617e-40	397.579	0	1	0	-	882	874	749	734	415	392	352	373	9.45199	9.49652	9.37428	9.37787	8.85357	8.82124	8.81747	8.89227	7.20311	7.57123	6.61141	6.57424	3.34754	3.23883	3.21154	3.54263
ENSMUSG00000025492	Ifitm3	chr7:141009585-141010770	-	678	1.02364	7.53015e-31	301.232	1.02364	7.53015e-31	301.232	0	1	0	-	6202	5793	4717	4618	2273	3035	2398	2327	12.2622	12.2545	12.072	12.0751	11.3694	11.6282	11.5112	11.5225	402.589	398.875	330.946	328.762	145.732	199.315	173.899	175.667
ENSMUSG00000032842	Abcc10	chr17:46303220-46328352	-	6856	1.02255	6.54071e-29	281.844	1.02255	6.54071e-29	281.844	-1.3427	1.01312e-06	59.9434	chr17:46322136-46322292	512	497	444	406	224	236	214	202	8.63683	8.66119	8.58105	8.52931	8.04203	8.08461	8.08799	8.07917	3.28669	3.38414	3.08058	2.85833	1.42024	1.53268	1.53469	1.50801
ENSMUSG00000047786	Lix1	chr17:17402671-17459387	+	3434	1.02111	0.0018413	27.3488	1.02111	0.0018413	27.3488	0	1	0	-	8	11	5	7	2	1	1	0	2.11402	2.14635	2.08966	2.11096	2.05775	2.04806	2.04983	2.03932	0.10253	0.149539	0.0692612	0.098391	0.0253172	0.0129661	0.0143179	0
ENSMUSG00000024897	Apba1	chr19:23758875-23949597	+	6632	1.01863	5.39691e-05	42.6786	1.01863	5.39691e-05	42.6786	0	1	0	-	50	55	58	56	14	28	35	13	5.2852	5.33834	5.3629	5.35847	5.01395	5.13406	5.21547	5.03031	0.331807	0.387152	0.41601	0.407569	0.0917634	0.187985	0.259479	0.100328
ENSMUSG00000024678	Ms4a4d	chr19:11536800-11558467	+	1513	1.0182	2.76141e-07	65.5887	1.0182	2.76141e-07	65.5887	0	1	0	-	79	84	68	76	29	45	33	29	5.8637	5.9171	5.83073	5.88852	5.54458	5.66529	5.60676	5.58587	2.29799	2.59181	2.13792	2.42456	0.833192	1.32429	1.07239	0.981033
ENSMUSG00000002043	Trappc6a	chr7:19508669-19516145	+	1317	1.01737	4.85795e-19	183.135	1.01737	4.85795e-19	183.135	0	1	0	-	443	386	364	341	197	168	149	203	8.38399	8.32217	8.28729	8.25581	7.81562	7.72695	7.71821	7.93767	14.8039	13.6825	13.1473	12.4976	6.50229	5.67981	5.56261	7.88923
ENSMUSG00000033594	Spata2l	chr8:123232254-123236209	-	2683	1.01672	1.52896e-11	108.156	1.01672	1.52896e-11	108.156	0	1	0	-	173	158	139	133	71	88	65	54	6.95564	6.93589	6.86759	6.85595	6.50683	6.60547	6.51986	6.46617	2.83782	2.74916	2.46442	2.3927	1.15033	1.4604	1.19116	1.03014
ENSMUSG00000032172	Olfm2	chr9:20667985-20728219	-	1530	1.01633	0.000186918	37.2835	1.01633	0.000186918	37.2835	0	1	0	-	41	34	33	25	9	13	15	15	4.61518	4.57942	4.57511	4.51567	4.3603	4.39858	4.43159	4.43826	1.17938	1.03741	1.02599	0.78869	0.255704	0.378322	0.482035	0.501793
ENSMUSG00000038422	Hdhd3	chr4:62499007-62503467	-	1366	1.01553	1.35083e-20	198.694	1.01553	1.35083e-20	198.694	0	1	0	-	354	296	288	302	172	161	124	128	8.05643	7.96698	7.95698	8.00993	7.57315	7.54166	7.4531	7.49538	11.4054	10.1159	10.0291	10.6712	5.47348	5.2479	4.46323	4.79605
ENSMUSG00000031497	Tnfsf13b	chr8:10006842-10035441	+	930	1.01521	0.000275896	35.5925	1.01521	0.000275896	35.5925	0	1	0	-	28	28	34	31	10	14	16	7	4.40066	4.4135	4.46407	4.44631	4.25101	4.28897	4.32207	4.23789	1.32506	1.40552	1.73907	1.60893	0.467415	0.670278	0.845893	0.385247
ENSMUSG00000031099	Smarca1	chrX:47809367-47892974	-	6118	1.0144	3.56779e-18	174.476	1.0144	3.56779e-18	174.476	-1.13758	0.0039378	24.0475	chrX:47892224-47892552	472	481	533	450	271	288	178	180	8.59589	8.6592	8.755	8.63613	8.19438	8.2457	7.99757	8.03202	3.39541	3.67028	4.14418	3.55027	1.92551	2.09601	1.4305	1.50587
ENSMUSG00000029061	Mmp23	chr4:155650654-155653384	-	2340	1.01438	0.000327461	34.8484	1.01438	0.000327461	34.8484	0	1	0	-	33	53	26	31	14	13	20	8	4.63041	4.78891	4.59198	4.6385	4.47817	4.47096	4.55083	4.44011	0.620666	1.05736	0.52854	0.639446	0.260075	0.247365	0.420235	0.174984
ENSMUSG00000010797	Wnt2	chr6:17988939-18030585	-	2255	1.01437	4.4317e-05	43.5343	1.01437	4.4317e-05	43.5343	0	1	0	-	48	53	38	43	19	29	16	12	5.06006	5.11267	5.01103	5.05511	4.84617	4.93036	4.8395	4.80773	0.936816	1.09722	0.8016	0.920406	0.366263	0.572614	0.34886	0.27237
ENSMUSG00000026921	Egfl7	chr2:26580013-26593120	+	3581	1.01417	7.44557e-24	231.281	1.01417	7.44557e-24	231.281	0	1	0	-	618	572	490	508	248	246	252	283	8.90065	8.88582	8.76979	8.81909	8.22428	8.22766	8.31298	8.42471	7.59528	7.45684	6.50897	6.84727	3.01046	3.05873	3.45999	4.04489
ENSMUSG00000020053	Igf1	chr10:87858264-87937042	+	9904	1.01395	1.87187e-16	157.277	1.01395	1.87187e-16	157.277	0	1	0	-	581	543	516	504	324	219	186	275	8.83105	8.82443	8.79374	8.79439	8.38893	8.13247	8.0961	8.38481	2.58181	2.55948	2.47833	2.45628	1.42207	0.984563	0.92338	1.42117
ENSMUSG00000087431	Gm16054	chr5:81791908-81798426	-	1819	1.01267	0.00119316	29.233	1.01267	0.00119316	29.233	0	1	0	-	15	22	27	23	13	9	4	4	3.82175	3.8902	3.93373	3.90542	3.80625	3.77143	3.73014	3.73283	0.362926	0.564616	0.706076	0.610313	0.310668	0.220303	0.10812	0.112552
ENSMUSG00000014813	Stc1	chr14:69029288-69041401	+	3743	1.01251	0.000480159	33.1861	1.01251	0.000480159	33.1861	0	1	0	-	26	29	32	22	15	6	12	8	4.23904	4.27536	4.30228	4.22478	4.15005	4.06839	4.13735	4.10181	0.305712	0.361694	0.406678	0.283701	0.174204	0.0713743	0.15763	0.109394
ENSMUSG00000097542	Gm26751	chr14:55864310-55874735	-	4245	1.01153	8.38008e-48	470.768	1.01153	8.38008e-48	470.768	0	1	0	-	876	887	840	790	434	445	397	350	9.47759	9.5409	9.50533	9.47316	8.92134	8.94985	8.94076	8.88021	9.08209	9.75459	9.41287	8.98271	4.44425	4.66759	4.59823	4.22002
ENSMUSG00000073802	Cdkn2b	chr4:89306288-89311032	-	1393	1.01141	2.18032e-59	586.615	1.01141	2.18032e-59	586.615	0	1	0	-	2954	2858	2541	2362	1362	1446	1158	1173	11.2173	11.2429	11.1457	11.1006	10.5412	10.6024	10.5013	10.5479	93.3295	95.7799	86.7709	81.8439	42.5023	46.2197	40.8729	43.0994
ENSMUSG00000091954	Gm17179	chr3:94392970-94402848	-	394	1.01084	0.00234835	26.2924	1.01084	0.00234835	26.2924	0	1	0	-	6	13	11	6	1	1	1	3	2.3622	2.43163	2.41456	2.36782	2.31443	2.31468	2.31664	2.33975	0.670216	1.54032	1.32806	0.735043	0.110329	0.113009	0.124791	0.389717
ENSMUSG00000097131	D230017M19Rik	chr1:72236464-72274869	+	5335	1.01066	5.28255e-05	42.7716	1.01066	5.28255e-05	42.7716	0	1	0	-	40	35	39	40	17	17	15	15	4.81374	4.793	4.82674	4.84102	4.63802	4.64013	4.63828	4.64521	0.329978	0.306265	0.347737	0.361896	0.138516	0.141881	0.13824	0.143907
ENSMUSG00000029185	Fam114a1	chr5:64970070-65041874	+	2964	1.01061	1.81131e-45	447.42	1.01061	1.81131e-45	447.42	0	1	0	-	4695	4328	4303	4043	2431	2179	1665	2051	11.8998	11.8797	11.8874	11.8516	11.3139	11.2308	11.0897	11.3026	69.7135	68.1667	69.0579	65.839	35.6527	32.7333	27.6194	35.417
ENSMUSG00000086915	Gm16365	chr10:39558495-39613682	-	1408	1.01008	0.000123107	39.0972	1.01008	0.000123107	39.0972	0	1	0	-	42	42	33	36	18	18	7	19	4.80418	4.82116	4.75744	4.78701	4.62267	4.62483	4.53533	4.65933	1.31282	1.39255	1.11489	1.23412	0.55572	0.56922	0.244441	0.690678
ENSMUSG00000029810	Tmem176b	chr6:48833810-48841374	-	2049	1.00986	4.80739e-69	683.181	1.00986	4.80739e-69	683.181	0	1	0	-	9816	9498	8079	7899	4472	4512	3899	4046	12.9547	12.9812	12.8393	12.8413	12.2466	12.2655	12.2264	12.2961	210.84	216.398	187.558	186.075	94.8737	98.0477	93.5599	101.067
ENSMUSG00000005986	Ankrd13d	chr19:4270179-4283137	-	2460	1.00891	7.37418e-12	111.323	1.00891	7.37418e-12	111.323	-1.21079	1	0	chr19:4282168-4282304	282	237	177	178	112	115	93	85	7.60325	7.52129	7.33579	7.35484	7.0399	7.06035	7.00637	6.98514	5.04514	4.49755	3.42262	3.49255	1.97911	2.08148	1.85877	1.76851
ENSMUSG00000071369	Map3k5	chr10:19934471-20142753	+	6262	1.00755	1.492e-11	108.262	1.00755	1.492e-11	108.262	0	1	0	-	152	144	134	139	60	81	61	62	6.83063	6.83338	6.79946	6.83463	6.39468	6.52107	6.4471	6.47163	1.06829	1.07353	1.01792	1.07142	0.416509	0.575946	0.478955	0.506761
ENSMUSG00000074923	Pak6	chr2:118663302-118698020	+	5211	1.00633	0.000938313	30.2765	1.00633	0.000938313	30.2765	0	1	0	-	25	14	23	25	8	7	8	8	3.92366	3.84057	3.92096	3.94218	3.78087	3.7726	3.79099	3.79498	0.211144	0.125421	0.209956	0.231567	0.0667352	0.0598118	0.0754827	0.0785767
ENSMUSG00000039763	Dnajc28	chr16:91614256-91619026	-	3562	1.00631	2.3094e-06	56.365	1.00631	2.3094e-06	56.365	0	1	0	-	85	85	81	52	27	45	32	29	5.87282	5.89927	5.88323	5.71352	5.50495	5.64156	5.57474	5.5618	1.05023	1.11401	1.08171	0.70464	0.3295	0.562508	0.441707	0.416705
ENSMUSG00000001768	Rin2	chr2:145784733-145887616	+	5399	1.0047	4.40286e-31	303.563	1.0047	4.40286e-31	303.563	-1.05841	1.21917e-06	59.1394	chr2:145822272-145822368	714	656	702	556	324	356	307	271	9.14338	9.12219	9.19191	9.0158	8.53765	8.61434	8.58135	8.52467	5.82029	5.67223	6.18507	4.97072	2.60866	2.93594	2.79578	2.5691
ENSMUSG00000030806	Stx1b	chr7:127803899-127824549	-	4802	1.00423	2.03844e-11	106.907	1.00423	2.03844e-11	106.907	0	1	0	-	159	140	127	137	63	64	68	66	6.84847	6.80794	6.76006	6.81717	6.4038	6.41504	6.48182	6.48812	1.45725	1.36103	1.25806	1.37707	0.570301	0.593428	0.69625	0.703471
ENSMUSG00000093075	Gm25948	chr11:120068126-120068238	-	112	1.00331	0.00020136	36.9603	1.00331	0.00020136	36.9603	0	1	0	-	32	42	32	30	18	18	10	9	4.58432	4.67168	4.6016	4.5916	4.47671	4.47878	4.42026	4.41538	12.5745	17.5063	13.591	12.9289	6.98619	7.15591	4.38996	4.11291
ENSMUSG00000034898	Filip1	chr9:79815050-79977804	-	4888	1.0031	0.00268191	25.7156	1.0031	0.00268191	25.7156	0	1	0	-	17	15	16	8	0	7	2	5	3.15191	3.14209	3.15295	3.07944	2.99428	3.06431	3.01854	3.05334	0.153065	0.143259	0.155707	0.0789981	0	0.0637642	0.0201176	0.0523556
ENSMUSG00000037579	Kcnh3	chr15:99224975-99242817	+	3583	1.00269	0.0027636	25.5852	1.00269	0.0027636	25.5852	0	1	0	-	10	18	10	7	2	2	5	1	2.7627	2.84128	2.76925	2.74162	2.68709	2.68748	2.72286	2.68068	0.122832	0.234525	0.132762	0.0942994	0.0242644	0.0248538	0.0686122	0.0142849
ENSMUSG00000029056	Pank4	chr4:154964122-154980938	+	3487	1.00247	2.84673e-43	425.457	1.00247	2.84673e-43	425.457	0	1	0	-	978	949	905	823	517	462	391	392	9.61887	9.6452	9.61556	9.5539	9.10299	9.02705	8.97892	9.01324	12.3437	12.7051	12.3457	11.3921	6.44503	5.8993	5.51319	5.75385
ENSMUSG00000020241	Col6a2	chr10:76595761-76623630	-	8326	1.00172	3.14006e-14	135.031	1.00172	3.14006e-14	135.031	0	1	0	-	7219	6394	5816	6137	3647	2932	2267	3179	12.4961	12.4374	12.3604	12.435	11.8791	11.7011	11.5699	11.8963	38.1593	35.8508	33.2283	35.5777	19.0408	15.6797	13.3873	19.5424
ENSMUSG00000022123	Scel	chr14:103513340-103613346	+	3053	1.00002	2.62608e-26	255.807	1.00002	2.62608e-26	255.807	0	1	0	-	629	635	652	578	302	375	248	273	9.00394	9.06219	9.09638	9.01522	8.45324	8.61788	8.39845	8.49426	9.06741	9.7098	10.1588	9.13816	4.29998	5.46908	3.99396	4.57678
ENSMUSG00000053560	Ier2	chr8:84661330-84662852	-	1522	0.999908	8.48043e-33	320.716	0.999908	8.48043e-33	320.716	0	1	0	-	2234	2211	1687	1711	931	974	938	909	10.7923	10.839	10.6019	10.6371	10.0408	10.0879	10.1401	10.15	64.5993	67.8168	52.7255	54.2617	26.5902	28.4941	30.3017	30.5685
ENSMUSG00000087095	Emx2os	chr19:59425103-59458635	-	5023	0.999795	5.47857e-14	132.613	0.999795	5.47857e-14	132.613	0	1	0	-	217	183	219	195	110	86	87	100	7.37436	7.30168	7.4296	7.36764	6.98404	6.87321	6.92744	7.01774	1.90132	1.70079	2.07397	1.87383	0.951953	0.762334	0.851598	1.01897
ENSMUSG00000046312	AI464131	chr4:41495603-41503076	-	4701	0.999089	3.62099e-24	234.412	0.999089	3.62099e-24	234.412	0	1	0	-	548	481	456	398	224	264	206	206	8.70386	8.64585	8.61387	8.52518	8.0542	8.17189	8.07544	8.10413	5.13038	4.77659	4.61419	4.08649	2.0713	2.50048	2.15454	2.24286
ENSMUSG00000028838	Extl1	chr4:134356371-134383850	-	4333	0.998949	0.000682098	31.6615	0.998949	0.000682098	31.6615	0	1	0	-	26	35	21	27	7	14	14	6	4.23704	4.31858	4.21001	4.26489	4.07737	4.14218	4.15575	4.08092	0.264085	0.377088	0.230543	0.300769	0.0702256	0.143863	0.158861	0.070874
ENSMUSG00000035407	Kank4	chr4:98754897-98817537	-	4795	0.998298	7.54753e-42	411.222	0.998298	7.54753e-42	411.222	-1.47716	9.53724e-11	100.206	chr4:98785656-98785744	800	754	764	674	369	401	351	323	9.32479	9.32535	9.34872	9.26209	8.72155	8.79191	8.76905	8.74054	7.34279	7.34084	7.57923	6.78467	3.34521	3.72363	3.59912	3.44777
ENSMUSG00000061046	Haghl	chr17:25779842-25785673	-	2643	0.997591	1.94073e-25	247.12	0.997591	1.94073e-25	247.12	0	1	0	-	929	816	759	778	481	398	302	394	9.50711	9.44599	9.39538	9.43781	8.9753	8.84284	8.71964	8.94376	15.4696	14.4131	13.6605	14.2082	7.91105	6.70496	5.61808	7.62999
ENSMUSG00000020524	Gria1	chr11:57011386-57330244	+	6043	0.996207	0.00174911	27.5718	0.996207	0.00174911	27.5718	0	1	0	-	19	20	22	15	7	3	4	11	3.67334	3.69127	3.71082	3.65213	3.56802	3.5298	3.54563	3.62227	0.138376	0.154504	0.173177	0.119811	0.0503537	0.0221044	0.0325451	0.0931676
ENSMUSG00000024053	Emilin2	chr17:71252175-71310965	-	3910	0.995794	6.86601e-08	71.633	0.995794	6.86601e-08	71.633	0	1	0	-	131	119	112	117	62	54	32	70	6.57315	6.55247	6.52711	6.56363	6.23169	6.18653	6.06355	6.34643	1.47453	1.4208	1.36258	1.44433	0.689288	0.614932	0.402394	0.916317
ENSMUSG00000040612	Ildr2	chr1:166254138-166316823	+	8251	0.995273	5.56821e-56	552.543	0.995273	5.56821e-56	552.543	-1.33964	2.4569e-51	506.096	chr1:166295744-166295936	5014	4662	4682	4175	2347	2533	2302	1818	11.9979	11.9859	12.0033	11.9179	11.3244	11.4012	11.4058	11.2414	26.7447	26.3772	26.9926	24.4235	12.365	13.6691	13.7176	11.2775
ENSMUSG00000044788	Fads6	chr11:115279621-115297663	-	6653	0.994665	5.74154e-20	192.41	0.994665	5.74154e-20	192.41	0	1	0	-	333	323	287	310	146	157	135	160	8.02492	8.0466	7.96918	8.04421	7.49308	7.5422	7.5155	7.64157	2.20286	2.26646	2.05204	2.24906	0.953941	1.05073	0.997688	1.23091
ENSMUSG00000046854	Pip5kl1	chr2:32574796-32583782	+	2494	0.9935	0.00238967	26.2166	0.9935	0.00238967	26.2166	0	1	0	-	12	12	19	16	3	7	4	4	3.25071	3.25702	3.32129	3.2982	3.16831	3.20747	3.18384	3.18614	0.21176	0.22462	0.362391	0.309657	0.0522891	0.124972	0.0788573	0.0820896
ENSMUSG00000029661	Col1a2	chr6:4504813-4541543	+	12136	0.993087	1.21031e-45	449.171	0.993087	1.21031e-45	449.171	0	1	0	-	134041	129434	128149	120756	69683	65303	49901	63643	16.7612	16.7858	16.7897	16.7559	16.1665	16.1203	15.9732	16.2257	486.096	497.893	502.296	480.276	249.596	239.589	202.168	268.411
ENSMUSG00000087075	A230065H16Rik	chr12:111406808-111412077	+	657	0.992095	0.00247721	26.0604	0.992095	0.00247721	26.0604	0	1	0	-	5	8	7	10	1	1	0	2	2.06377	2.09584	2.08708	2.11802	2.02538	2.02559	2.0164	2.03932	0.334938	0.568444	0.506819	0.73467	0.0661638	0.0677711	0	0.155808
ENSMUSG00000059173	Pde1a	chr2:79834452-80129458	-	6012	0.990869	1.78592e-11	107.481	0.990869	1.78592e-11	107.481	0	1	0	-	164	161	146	136	66	83	61	75	6.93923	6.9638	6.91295	6.88536	6.49482	6.59579	6.51169	6.61694	1.20056	1.25017	1.15519	1.09189	0.477212	0.614709	0.498872	0.638509
ENSMUSG00000097588	Gm17388	chr4:136355773-136359440	+	3515	0.99004	0.00190037	27.2116	0.99004	0.00190037	27.2116	0	1	0	-	14	15	25	18	4	8	5	7	3.56378	3.58028	3.66945	3.61287	3.47234	3.51188	3.48941	3.5138	0.175292	0.199218	0.338326	0.247175	0.0494676	0.101339	0.0699396	0.101929
ENSMUSG00000097745	AI115009	chr3:152666912-152681432	+	1853	0.989128	3.8584e-05	44.1359	0.989128	3.8584e-05	44.1359	0	1	0	-	49	56	40	42	16	20	22	22	5.11713	5.18291	5.07646	5.09836	4.87101	4.90763	4.94491	4.95395	1.1638	1.41083	1.02685	1.09404	0.375345	0.480579	0.583748	0.607676
ENSMUSG00000038332	Sesn1	chr10:41810573-41908424	+	3327	0.989005	6.54122e-32	311.843	0.989005	6.54122e-32	311.843	-1.03102	0.000115761	39.3644	chr10:41810572-41811300	599	655	573	542	313	302	262	271	8.93444	9.05983	8.95878	8.93284	8.44765	8.43178	8.40465	8.45841	7.9238	9.19077	8.19261	7.86329	4.08957	4.0417	3.87192	4.16909
ENSMUSG00000041361	Myzap	chr9:71504346-71592360	-	5635	0.987925	0.000946682	30.238	0.987925	0.000946682	30.238	0	1	0	-	24	32	22	18	13	10	6	7	4.05427	4.1299	4.05116	4.02016	3.96349	3.93758	3.90764	3.92186	0.187446	0.265106	0.185716	0.154183	0.100285	0.0790162	0.0523523	0.0635812
ENSMUSG00000030409	Dmpk	chr7:19083848-19093821	+	4330	0.987462	2.45904e-26	256.092	0.987462	2.45904e-26	256.092	0	1	0	-	557	545	497	450	239	284	255	212	8.77785	8.80919	8.74467	8.68401	8.1612	8.28625	8.2825	8.18817	5.66144	5.87586	5.45995	5.01629	2.39936	2.92039	2.89555	2.50595
ENSMUSG00000012350	Ehf	chr2:103263432-103303278	-	5576	0.986594	0.00103554	29.8483	0.986594	0.00103554	29.8483	0	1	0	-	3	4	11	5	0	0	0	0	1.47865	1.49071	1.56066	1.50262	1.44874	1.44882	1.44948	1.44978	0.0236787	0.0334889	0.0938405	0.0432818	0	0	0	0
ENSMUSG00000040537	Adam22	chr5:8072351-8368160	-	12231	0.985885	5.36395e-17	162.705	0.985885	5.36395e-17	162.705	0	1	0	-	294	258	304	253	164	139	113	117	7.83954	7.78845	7.91783	7.80152	7.46348	7.37591	7.32081	7.36331	1.0579	0.984739	1.18231	0.998427	0.582865	0.506015	0.45425	0.489608
ENSMUSG00000031380	Figf	chrX:164373377-164402650	+	2408	0.985761	7.77747e-33	321.092	0.985761	7.77747e-33	321.092	0	1	0	-	851	670	704	754	369	412	340	326	9.37668	9.22292	9.27667	9.35668	8.71982	8.81028	8.74415	8.74545	15.5537	12.9892	13.9071	15.1138	6.66125	7.61817	6.94226	6.92924
ENSMUSG00000057729	Prtn3	chr10:79874475-79883174	+	1732	0.985645	0.00192648	27.1524	0.985645	0.00192648	27.1524	0	1	0	-	7	10	6	4	0	0	0	2	1.84714	1.87929	1.84179	1.82278	1.78005	1.78015	1.78094	1.80379	0.177873	0.269535	0.164787	0.111473	0	0	0	0.0591026
ENSMUSG00000047793	Sned1	chr1:93235840-93301065	+	9491	0.985553	6.00691e-06	52.2135	0.985553	6.00691e-06	52.2135	0	1	0	-	61	62	50	59	25	25	31	22	5.4558	5.484	5.41041	5.47904	5.20898	5.21186	5.28509	5.21832	0.282864	0.30496	0.250599	0.300053	0.114502	0.117284	0.160594	0.118641
ENSMUSG00000067780	Pi15	chr1:17601900-17630938	+	6922	0.983719	0.00316099	25.0018	0.983719	0.00316099	25.0018	0	1	0	-	8	11	15	8	2	6	0	0	2.60469	2.63729	2.67523	2.61187	2.54846	2.58781	2.53006	2.53066	0.0508649	0.0741864	0.103081	0.0557848	0.0125598	0.0385949	0	0
ENSMUSG00000025227	Tmem180	chr19:46341120-46375252	+	2804	0.982979	6.48179e-13	121.883	0.982979	6.48179e-13	121.883	0	1	0	-	222	233	190	179	116	98	77	101	7.4011	7.4744	7.34633	7.32339	7.02299	6.94552	6.88402	7.03469	3.48445	3.87919	3.22327	3.08129	1.79832	1.55617	1.35018	1.84361
ENSMUSG00000097222	1010001N08Rik	chr18:11049086-11052567	-	2060	0.982472	4.13425e-15	143.836	0.982472	4.13425e-15	143.836	-1.13713	1	0	chr18:11052474-11052567	234	194	206	209	96	106	105	96	7.46072	7.37509	7.42377	7.44967	6.95423	7.00872	7.05673	7.03391	4.99929	4.39641	4.75686	4.89708	2.02577	2.29113	2.50611	2.38522
ENSMUSG00000052921	Arhgef15	chr11:68943154-68957480	-	6483	0.982086	0.00133098	28.7583	0.982086	0.00133098	28.7583	0	1	0	-	17	28	22	21	6	8	12	6	3.88378	3.98407	3.93775	3.93345	3.7873	3.80711	3.85555	3.79926	0.115407	0.201625	0.161424	0.156351	0.040231	0.0549445	0.0910088	0.0473696
ENSMUSG00000040841	Six5	chr7:19094593-19098549	+	3007	0.981772	4.8166e-26	253.173	0.981772	4.8166e-26	253.173	0	1	0	-	592	611	489	479	290	286	238	240	8.86706	8.94358	8.77062	8.77362	8.33297	8.33243	8.27746	8.31277	8.66459	9.48573	7.73563	7.68882	4.19228	4.2349	3.89154	4.0851
ENSMUSG00000025727	A930017K11Rik	chr17:25946386-25952565	-	2539	0.981573	0.000465597	33.3199	0.981573	0.000465597	33.3199	0	1	0	-	31	35	23	29	9	14	15	9	4.40102	4.44557	4.35234	4.40738	4.21922	4.26641	4.29	4.23622	0.537352	0.64353	0.430909	0.551306	0.154087	0.245514	0.290474	0.181428
ENSMUSG00000097328	Tnfsf12	chr11:69682576-69696098	-	3019	0.981552	6.67049e-45	441.758	0.981552	6.67049e-45	441.758	1.02372	8.86231e-06	50.5245	chr11:69682576-69683344	987	908	854	837	485	452	389	426	9.62023	9.59953	9.55803	9.56179	9.04677	9.00336	8.96782	9.06862	14.3884	14.0406	13.456	13.382	6.98336	6.66631	6.33527	7.22223
ENSMUSG00000042662	Dusp15	chr2:152940996-152951698	-	4391	0.981198	0.00270737	25.6745	0.981198	0.00270737	25.6745	0	1	0	-	24	14	10	14	3	5	6	5	3.40911	3.3325	3.29653	3.3372	3.2241	3.24447	3.26105	3.25329	0.240551	0.148843	0.108332	0.153894	0.0296991	0.050701	0.067184	0.0582816
ENSMUSG00000050957	Insl6	chr19:29321343-29325356	-	708	0.980845	8.58657e-08	70.6618	0.980845	8.58657e-08	70.6618	0	1	0	-	96	94	78	84	51	44	34	34	6.11205	6.12999	6.04938	6.09403	5.86146	5.81858	5.77598	5.78888	5.96757	6.19809	5.24061	5.72669	3.13129	2.76713	2.36115	2.45793
ENSMUSG00000038119	Cdon	chr9:35421127-35507652	+	7715	0.979094	1.69145e-104	1037.72	0.979094	1.69145e-104	1037.72	-1.26515	2.65736e-61	605.755	chr9:35421552-35421816	3968	3612	3629	3628	1960	1992	1653	1703	11.6689	11.637	11.6546	11.6775	11.0473	11.0722	10.9995	11.0615	22.6358	21.8562	22.3754	22.6981	11.0435	11.4964	10.5345	11.298
ENSMUSG00000089901	Gm8113	chr14:43925389-43933411	+	2721	0.979078	3.06224e-08	75.1396	0.979078	3.06224e-08	75.1396	0	1	0	-	150	116	152	96	69	49	61	59	6.71861	6.61007	6.76702	6.53295	6.35001	6.23575	6.34823	6.35274	2.42618	1.99018	2.65727	1.70294	1.10232	0.801822	1.10225	1.10981
ENSMUSG00000060063	Alox5ap	chr5:149265057-149288045	+	852	0.978959	0.00227551	26.4292	0.978959	0.00227551	26.4292	0	1	0	-	27	16	13	14	4	6	6	7	3.61832	3.53622	3.51057	3.52292	3.41944	3.43973	3.44686	3.46071	1.39471	0.876685	0.725812	0.793133	0.204083	0.313561	0.34625	0.420517
ENSMUSG00000092103	Gm17039	chr13:67360670-67365679	+	4901	0.978772	0.00179025	27.4709	0.978772	0.00179025	27.4709	0	1	0	-	23	17	18	19	4	10	9	4	3.74096	3.69977	3.7107	3.72339	3.57416	3.63236	3.63252	3.58343	0.206539	0.16193	0.174706	0.187123	0.0354782	0.0908501	0.0902893	0.0417734
ENSMUSG00000097187	Gm19426	chr2:84742168-84743655	-	726	0.978759	3.18146e-09	84.9737	0.978759	3.18146e-09	84.9737	0	1	0	-	112	111	103	96	55	52	45	46	6.38057	6.40639	6.37458	6.35109	6.08	6.06537	6.05313	6.07564	6.78955	7.13756	6.74872	6.38252	3.29315	3.18916	3.04757	3.24299
ENSMUSG00000031344	Gabrq	chrX:72825177-72842602	+	5352	0.978476	3.74135e-05	44.2697	0.978476	3.74135e-05	44.2697	0	1	0	-	73	48	89	56	21	42	28	25	5.66045	5.52571	5.7807	5.59339	5.30879	5.47353	5.39383	5.37881	0.600297	0.418686	0.791033	0.505045	0.170565	0.349416	0.257229	0.239083
ENSMUSG00000041073	Nacad	chr11:6597822-6606053	-	4892	0.978163	4.23107e-09	83.7355	0.978163	4.23107e-09	83.7355	0	1	0	-	134	146	120	115	83	52	57	50	6.66611	6.74928	6.64512	6.63498	6.4331	6.2557	6.3272	6.29631	1.20553	1.39325	1.16685	1.13467	0.737527	0.47329	0.572884	0.523128
ENSMUSG00000021236	Entpd5	chr12:84373856-84409029	-	6039	0.978088	1.94527e-42	417.11	0.978088	1.94527e-42	417.11	0	1	0	-	1538	1311	1342	1295	660	795	661	572	10.2611	10.1707	10.2043	10.1942	9.55393	9.71302	9.64576	9.56596	11.2086	10.1345	10.5708	10.3505	4.75078	5.86155	5.38164	4.84792
ENSMUSG00000015850	Adamtsl4	chr3:95676200-95687917	-	4198	0.977795	6.0822e-15	142.159	0.977795	6.0822e-15	142.159	0	1	0	-	530	561	523	478	282	220	195	304	8.74719	8.84337	8.79662	8.74286	8.28256	8.12675	8.11666	8.44885	5.55639	6.23855	5.92625	5.49596	2.92007	2.33341	2.28387	3.70643
ENSMUSG00000060268	Gm1661	chr4:117213332-117252125	-	2463	0.977169	0.00325612	24.873	0.977169	0.00325612	24.873	0	1	0	-	16	18	10	9	4	2	4	5	3.11048	3.13557	3.06477	3.05733	3.00321	2.98413	3.00878	3.02177	0.285901	0.34117	0.193133	0.176375	0.0705962	0.0361556	0.0798498	0.103904
ENSMUSG00000027896	Slc16a4	chr3:107291229-107312115	+	3879	0.976578	7.63676e-05	41.1709	0.976578	7.63676e-05	41.1709	-1.29035	1	0	chr3:107306040-107306112	41	38	41	43	19	15	16	20	4.90417	4.89906	4.92504	4.94678	4.73851	4.70603	4.73141	4.77644	0.465183	0.457327	0.502788	0.535065	0.212922	0.17218	0.202805	0.263897
ENSMUSG00000028919	Arhgef19	chr4:141239498-141257564	+	4242	0.975883	4.42353e-26	253.542	0.975883	4.42353e-26	253.542	0	1	0	-	630	659	572	558	264	319	306	287	8.99127	9.07977	8.97217	8.97183	8.34711	8.48596	8.52915	8.5146	6.53626	7.25234	6.41425	6.34923	2.70532	3.34835	3.54674	3.46287
ENSMUSG00000089736	Gm14378	chr8:4248213-4251423	+	1870	0.975636	1.33678e-08	78.7394	0.975636	1.33678e-08	78.7394	0	1	0	-	117	157	133	105	57	60	56	66	6.58741	6.78811	6.69786	6.58164	6.27742	6.30108	6.31531	6.39812	2.75362	3.91941	3.38322	2.71023	1.32501	1.42863	1.4724	1.80645
ENSMUSG00000037235	Mxd4	chr5:34173886-34187720	-	3882	0.975227	8.17586e-50	490.875	0.975227	8.17586e-50	490.875	0	1	0	-	2092	2018	1838	1854	978	1007	847	994	10.7361	10.7585	10.6851	10.7156	10.0862	10.1207	10.0624	10.2299	23.7173	24.2677	22.5222	23.0522	10.9514	11.5501	10.7277	13.1056
ENSMUSG00000003354	Ccdc65	chr15:98708206-98723326	+	1890	0.975191	0.000693128	31.5919	0.975191	0.000693128	31.5919	0	1	0	-	36	39	26	21	11	15	16	6	4.46481	4.50226	4.40407	4.36623	4.26398	4.30171	4.32594	4.231	0.838301	0.96331	0.654383	0.536309	0.252998	0.353378	0.416233	0.162485
ENSMUSG00000022425	Enpp2	chr15:54838897-54920146	-	3473	0.974986	0.00225378	26.4709	0.974986	0.00225378	26.4709	0	1	0	-	24	15	15	20	4	10	3	8	3.68011	3.61381	3.61563	3.66356	3.5075	3.56489	3.50336	3.55873	0.304135	0.201627	0.20545	0.27796	0.0500658	0.128205	0.0424712	0.117899
ENSMUSG00000044006	Cilp2	chr8:69880368-69887687	-	4314	0.974398	0.00192484	27.1561	0.974398	0.00192484	27.1561	0	1	0	-	20	20	22	17	7	13	3	5	3.7487	3.75832	3.77784	3.7377	3.63532	3.69209	3.60244	3.62668	0.204037	0.216428	0.242584	0.190207	0.0705349	0.134176	0.0341916	0.0593218
ENSMUSG00000068758	Il3ra	chr14:14346494-14355490	+	1394	0.972377	1.00906e-18	179.961	0.972377	1.00906e-18	179.961	0	1	0	-	565	520	468	409	205	253	256	233	8.76038	8.74103	8.66633	8.57837	8.03174	8.17608	8.25394	8.21943	17.838	17.4142	15.97	14.1618	6.39259	8.08105	9.02933	8.55496
ENSMUSG00000054708	Ankrd24	chr10:81628539-81647610	+	8142	0.969688	2.15337e-17	166.669	0.969688	2.15337e-17	166.669	0	1	0	-	251	243	243	260	132	127	120	106	7.6509	7.66968	7.67929	7.74446	7.26176	7.24809	7.27371	7.23167	1.35676	1.39328	1.4197	1.54135	0.70474	0.694517	0.72465	0.666345
ENSMUSG00000021238	Aldh6a1	chr12:84430722-84450950	-	3340	0.967734	1.36274e-27	268.656	0.967734	1.36274e-27	268.656	0	1	0	-	593	506	504	471	262	296	224	236	8.84208	8.76048	8.76854	8.73328	8.23566	8.32846	8.20892	8.27311	7.8139	7.07241	7.17802	6.80663	3.40989	3.94598	3.29746	3.61651
ENSMUSG00000023911	Flywch2	chr17:23776915-23786081	-	996	0.967465	0.000105585	39.764	0.967465	0.000105585	39.764	0	1	0	-	57	47	34	34	21	19	16	18	5.06384	5.0173	4.9261	4.93245	4.80872	4.79423	4.78503	4.81149	2.51869	2.20294	1.62383	1.6477	0.916528	0.849385	0.78984	0.924992
ENSMUSG00000024620	Pdgfrb	chr18:61045149-61085061	+	5478	0.966322	0.000265859	35.7535	0.966322	0.000265859	35.7535	-1.07545	0.396221	4.02063	chr18:61060144-61060188	802	910	880	666	465	247	204	449	9.32845	9.49239	9.47481	9.25317	8.89356	8.4556	8.40258	8.98919	6.44335	7.75501	7.64154	5.86827	3.68992	2.00764	1.83099	4.19516
ENSMUSG00000035773	Kiss1r	chr10:79916970-79922273	+	3163	0.965446	0.00263056	25.7995	0.965446	0.00263056	25.7995	0	1	0	-	20	16	12	17	5	8	5	4	3.47764	3.45223	3.41767	3.46642	3.34674	3.376	3.35366	3.34563	0.278285	0.236148	0.180469	0.259422	0.0687158	0.112616	0.0777229	0.064727
ENSMUSG00000043496	Tril	chr6:53815470-53820825	-	5355	0.965173	0.000238738	36.2208	0.965173	0.000238738	36.2208	0	1	0	-	41	35	37	27	19	12	14	14	4.70602	4.67808	4.69681	4.62368	4.54035	4.48085	4.51362	4.52012	0.336964	0.305121	0.328672	0.243367	0.154234	0.0997773	0.128543	0.133811
ENSMUSG00000021071	Trim9	chr12:70244538-70347614	-	7424	0.964981	0.00370211	24.3155	0.964981	0.00370211	24.3155	0	1	0	-	9	5	12	8	1	3	0	2	2.31646	2.28235	2.35039	2.3143	2.24111	2.26128	2.23232	2.25527	0.0533536	0.0314409	0.0768889	0.0520127	0.00585529	0.0179926	0	0.0137885
ENSMUSG00000020883	Fbxl20	chr11:98082555-98150403	-	12106	0.964201	2.44923e-32	316.11	0.964201	2.44923e-32	316.11	-1.16906	9.94637e-11	100.023	chr11:98150112-98150400	731	741	706	621	342	402	318	319	9.21211	9.27507	9.24537	9.15722	8.62884	8.75598	8.65943	8.69316	2.65752	2.85746	2.77412	2.47599	1.22804	1.47855	1.29153	1.3487
ENSMUSG00000038319	Kcnh2	chr5:24319588-24351604	-	4845	0.963617	2.1072e-16	156.763	0.963617	2.1072e-16	156.763	-1.38161	0.0532328	12.7382	chr5:24331662-24332112	482	468	403	397	238	192	173	246	8.55444	8.57876	8.47045	8.47777	8.04598	7.9175	7.91778	8.17637	4.37837	4.50936	3.95669	3.95507	2.13535	1.76448	1.75562	2.59876
ENSMUSG00000019810	Fuca2	chr10:13499539-13519035	+	6161	0.9631	2.65996e-32	315.751	0.9631	2.65996e-32	315.751	0	1	0	-	831	758	778	717	457	426	325	320	9.3813	9.35363	9.3881	9.33875	8.90588	8.8626	8.73965	8.75997	5.93621	5.74356	6.00688	5.61728	3.22442	3.07871	2.59364	2.65842
ENSMUSG00000042357	Gjb5	chr4:127354808-127358181	-	1721	0.962068	1.1434e-22	219.418	0.962068	1.1434e-22	219.418	0	1	0	-	640	545	500	547	306	303	213	275	8.95348	8.86923	8.81004	8.90389	8.39287	8.39513	8.22779	8.42964	16.3666	14.7836	13.8201	15.3414	7.72906	7.8392	6.08523	8.17855
ENSMUSG00000021792	Fam213a	chr14:40993739-41013788	-	2948	0.961928	4.14557e-31	303.824	0.961928	4.14557e-31	303.824	0	1	0	-	807	777	710	617	384	403	344	307	9.3204	9.3394	9.27365	9.17557	8.73777	8.78296	8.74162	8.69139	12.0477	12.3043	11.4565	10.1022	5.66226	6.08678	5.73732	5.3301
ENSMUSG00000040856	Dlk1	chr12:109452822-109463336	+	5657	0.961439	2.63948e-42	415.785	0.961439	2.63948e-42	415.785	0	1	0	-	16472	14917	12144	14657	7350	7255	7420	6719	13.7015	13.6639	13.481	13.6842	12.971	12.9709	13.0794	13.0298	128.15	123.1	102.117	125.059	56.479	57.1033	64.4905	60.7915
ENSMUSG00000036764	Dnajc12	chr10:63382442-63408840	+	2740	0.960773	2.10015e-07	66.7775	0.960773	2.10015e-07	66.7775	0	1	0	-	90	105	99	82	51	41	34	50	6.15591	6.25994	6.23685	6.1575	5.93592	5.87212	5.851	5.98532	1.44561	1.78897	1.71872	1.44451	0.809106	0.66626	0.610108	0.933994
ENSMUSG00000021396	Nxnl2	chr13:51171024-51175187	+	1163	0.960739	0.00378642	24.2177	0.960739	0.00378642	24.2177	0	1	0	-	28	26	21	19	2	14	0	12	3.97373	3.96977	3.93005	3.91648	3.74572	3.86119	3.72898	3.86026	1.05959	1.04365	0.858935	0.788554	0.0747543	0.535992	0	0.528112
ENSMUSG00000029769	Ccdc136	chr6:29396308-29426994	+	4298	0.960084	8.52968e-40	390.691	0.960084	8.52968e-40	390.691	0	1	0	-	999	1038	951	834	494	515	454	432	9.67216	9.75923	9.69386	9.60047	9.10611	9.14785	9.12931	9.12473	10.2296	11.2744	10.5253	9.36607	4.99628	5.3352	5.19359	5.14449
ENSMUSG00000029456	Acad10	chr5:121621025-121660514	-	6068	0.959942	6.17344e-14	132.095	0.959942	6.17344e-14	132.095	0	1	0	-	212	219	216	192	94	108	96	109	7.39609	7.45749	7.45741	7.39481	6.94623	7.01988	7.01347	7.10128	1.53762	1.68485	1.69328	1.52726	0.673393	0.79248	0.777865	0.919402
ENSMUSG00000023044	Csad	chr15:102176997-102189043	-	2265	0.959918	1.38119e-34	338.597	0.959918	1.38119e-34	338.597	0	1	0	-	746	700	652	592	355	367	313	297	9.20542	9.20213	9.15347	9.09289	8.62964	8.66319	8.62216	8.61607	14.4954	14.4276	13.693	12.6157	6.81312	7.21453	6.79445	6.7114
ENSMUSG00000040563	BC018242	chr9:21937032-21948900	+	2622	0.959904	1.94077e-30	297.12	0.959904	1.94077e-30	297.12	0	1	0	-	810	834	680	670	406	364	352	356	9.34174	9.41922	9.25525	9.26338	8.79838	8.72826	8.77815	8.81857	13.596	14.849	12.3366	12.3339	6.731	6.18129	6.60067	6.94931
ENSMUSG00000079323	Gm20661	chr9:107983057-107995007	+	2160	0.958815	0.00175437	27.5588	0.958815	0.00175437	27.5588	0	1	0	-	18	25	23	17	6	11	7	7	3.82396	3.89169	3.87779	3.82979	3.71909	3.76654	3.73771	3.74135	0.366757	0.540318	0.506518	0.379886	0.120749	0.226751	0.159339	0.16587
ENSMUSG00000003623	Crot	chr5:8966032-8997324	-	5456	0.958542	3.8873e-66	654.104	0.958542	3.8873e-66	654.104	0	1	0	-	1946	1763	1780	1748	1002	992	793	825	10.6328	10.5973	10.6189	10.6248	10.0651	10.0675	9.96777	10.0349	15.6974	15.0849	15.5191	15.4641	7.98324	8.09557	7.14623	7.73935
ENSMUSG00000002012	Pnck	chrX:73655993-73660117	-	1971	0.957984	0.00436157	23.6036	0.957984	0.00436157	23.6036	0	1	0	-	11	8	13	16	4	2	0	6	2.9021	2.87945	2.92773	2.95803	2.83817	2.81904	2.80054	2.86715	0.245621	0.189481	0.313745	0.391824	0.0882184	0.0451808	0	0.155808
ENSMUSG00000049907	Rasl11b	chr5:74195287-74199481	+	1941	0.957287	7.06348e-17	161.51	0.957287	7.06348e-17	161.51	0	1	0	-	291	317	307	294	159	180	144	112	7.90615	8.01275	7.99906	7.98487	7.52152	7.60376	7.53191	7.41787	6.59822	7.62425	7.52373	7.31105	3.56088	4.12912	3.64767	2.95336
ENSMUSG00000024940	Ltbp3	chr19:5740903-5758532	+	5190	0.957277	7.97561e-68	670.982	0.957277	7.97561e-68	670.982	0	1	0	-	9462	9414	8164	8226	4334	4685	4408	4121	12.9283	12.9813	12.8583	12.8889	12.2299	12.3087	12.3437	12.3225	80.2371	84.6779	74.8266	76.5031	36.3001	40.1932	41.7592	40.6406
ENSMUSG00000055200	Sertad3	chr7:27473767-27477359	+	1324	0.95652	4.96323e-12	113.042	0.95652	4.96323e-12	113.042	0	1	0	-	282	204	193	182	106	116	100	94	7.60779	7.42391	7.39646	7.37409	7.01787	7.07041	7.04786	7.03943	9.37391	7.19292	6.9341	6.635	3.4802	3.90104	3.71356	3.63383
ENSMUSG00000049604	Hoxb13	chr11:96194315-96197447	+	2206	0.955286	2.88948e-21	205.392	0.955286	2.88948e-21	205.392	0	1	0	-	398	344	329	331	170	193	177	151	8.25245	8.18605	8.16276	8.18568	7.67733	7.76258	7.77278	7.70315	7.9403	7.27974	7.09432	7.24236	3.34988	3.89549	3.94499	3.50345
ENSMUSG00000059714	Flot1	chr17:35823229-35832791	+	2893	0.954855	7.80172e-43	421.078	0.954855	7.80172e-43	421.078	0	1	0	-	1979	1983	1651	1645	952	906	845	902	10.649	10.7066	10.5508	10.5698	10.0238	9.99412	10.0199	10.1092	30.1063	31.9991	27.1468	27.4458	14.3046	13.9441	14.3611	15.9582
ENSMUSG00000031673	Cdh11	chr8:102632994-102785111	-	4216	0.953659	1.61695e-101	1007.91	0.953659	1.61695e-101	1007.91	0	1	0	-	14996	14050	14648	13834	7585	8019	7064	6210	13.6096	13.6049	13.6584	13.627	12.9968	13.0573	13.0342	12.9591	156.543	155.575	165.272	158.382	78.2062	84.6895	82.3813	75.3903
ENSMUSG00000097988	Gm10535	chr1:135108960-135113378	+	915	0.952187	0.00214062	26.6946	0.952187	0.00214062	26.6946	0	1	0	-	19	28	18	19	11	6	4	10	3.84127	3.92468	3.84401	3.85662	3.77418	3.72902	3.71584	3.78127	0.913886	1.42857	0.935776	1.00228	0.522586	0.291971	0.21494	0.559376
ENSMUSG00000000532	Acvr1b	chr15:101174103-101213678	+	4375	0.95135	5.26608e-34	332.785	0.95135	5.26608e-34	332.785	0	1	0	-	715	701	688	596	341	376	321	307	9.17384	9.20799	9.20384	9.10322	8.60594	8.68594	8.6453	8.64475	7.19263	7.48003	7.4805	6.57546	3.38815	3.82666	3.60749	3.59158
ENSMUSG00000034957	Cebpa	chr7:35119292-35121926	+	2634	0.951043	7.57278e-06	51.2074	0.951043	7.57278e-06	51.2074	0	1	0	-	123	150	117	114	33	90	64	45	6.58552	6.73244	6.59773	6.59662	6.08343	6.44176	6.33736	6.22462	2.05518	2.65851	2.11296	2.08904	0.544608	1.52138	1.19466	0.874423
ENSMUSG00000020473	Aebp1	chr11:5861946-5872088	+	4058	0.950827	2.1108e-49	486.756	0.950827	2.1108e-49	486.756	0	1	0	-	32869	30960	28066	28143	14546	16924	15777	12734	14.7177	14.7181	14.637	14.6633	13.9803	14.1253	14.1527	14.001	356.479	356.166	328.995	334.747	155.818	185.695	191.157	160.612
ENSMUSG00000027339	Rassf2	chr2:131989414-132030258	-	11993	0.950072	6.61064e-22	211.798	0.950072	6.61064e-22	211.798	-1.56128	0.000256783	35.9043	chr2:132009688-132009760	389	393	428	369	226	197	194	167	8.32224	8.3764	8.45471	8.35699	7.94621	7.86692	7.92241	7.85647	1.42752	1.52978	1.6976	1.4851	0.819156	0.731389	0.795339	0.712711
ENSMUSG00000029385	Ccng2	chr5:93267256-93276231	+	5458	0.949815	4.50656e-23	223.462	0.949815	4.50656e-23	223.462	0	1	0	-	711	688	810	656	338	430	318	337	9.20436	9.22727	9.38012	9.21934	8.63779	8.82335	8.67666	8.75013	5.73318	5.88462	7.05947	5.80134	2.69196	3.50788	2.86465	3.16025
ENSMUSG00000049999	Ppp1r3d	chr2:178411205-178414472	-	3267	0.949638	0.000150567	38.2227	0.949638	0.000150567	38.2227	0	1	0	-	38	42	53	34	16	20	18	19	4.91586	4.96135	5.0421	4.91183	4.74557	4.78214	4.78291	4.80018	0.51191	0.600155	0.771698	0.502328	0.212891	0.272578	0.270895	0.297666
ENSMUSG00000032596	Uba7	chr9:107975504-107984060	+	6692	0.946665	1.96028e-09	87.0768	0.946665	1.96028e-09	87.0768	-1.14976	1	0	chr9:107976304-107976416	175	202	184	162	68	117	75	89	7.14138	7.27152	7.21922	7.15374	6.67161	6.92664	6.76286	6.86249	1.15091	1.40915	1.30792	1.16847	0.441712	0.778467	0.551041	0.680705
ENSMUSG00000068740	Celsr2	chr3:108390850-108415552	-	11513	0.946311	6.13114e-15	142.125	0.946311	6.13114e-15	142.125	0	1	0	-	271	286	220	246	126	127	136	114	7.72782	7.80936	7.63396	7.72809	7.26051	7.27188	7.36729	7.29407	1.03595	1.15969	0.908981	1.03135	0.475738	0.491163	0.580803	0.506805
ENSMUSG00000025268	Maged2	chrX:150806369-150814345	-	3239	0.945906	6.90058e-66	651.611	0.945906	6.90058e-66	651.611	0	1	0	-	4968	4710	4676	4305	2494	2489	2045	2345	12.0016	12.0082	12.0146	11.9595	11.391	11.4004	11.3188	11.4737	67.5041	67.8849	68.6727	64.1534	33.4712	34.2156	31.0428	37.0558
ENSMUSG00000000317	Bcl6b	chr11:70224127-70229798	-	3719	0.945904	7.10488e-05	41.4844	0.945904	7.10488e-05	41.4844	0	1	0	-	65	64	68	39	26	37	28	15	5.49117	5.5077	5.53761	5.35023	5.22761	5.31512	5.27112	5.16347	0.769213	0.803373	0.869768	0.50617	0.303902	0.442982	0.370178	0.206438
ENSMUSG00000041608	Entpd3	chr9:120539817-120568318	+	3746	0.943767	0.000563793	32.4888	0.943767	0.000563793	32.4888	0	1	0	-	28	30	31	32	11	17	10	13	4.43547	4.46428	4.47538	4.48909	4.29534	4.35048	4.29928	4.33468	0.328965	0.373867	0.393654	0.412325	0.127647	0.202065	0.131253	0.177623
ENSMUSG00000039450	Dcxr	chr11:120725398-120727281	-	1144	0.943238	1.21553e-12	119.152	0.943238	1.21553e-12	119.152	0	1	0	-	274	212	182	233	123	116	102	101	7.63065	7.49376	7.40297	7.58433	7.13944	7.11571	7.10352	7.12133	10.5411	8.65113	7.56773	9.83077	4.67375	4.51484	4.38382	4.51877
ENSMUSG00000038540	Tmc3	chr7:83584926-83625614	+	9027	0.942727	0.0028666	25.4263	0.942727	0.0028666	25.4263	0	1	0	-	29	25	11	16	6	9	6	8	3.85199	3.83197	3.70994	3.75986	3.65676	3.68637	3.66523	3.68983	0.141389	0.129288	0.0579655	0.0855528	0.0288931	0.0443925	0.0326803	0.0453598
ENSMUSG00000046794	Ppp1r3b	chr8:35375740-35388124	+	4206	0.941591	1.46568e-22	218.34	0.941591	1.46568e-22	218.34	0	1	0	-	455	421	452	402	235	240	224	166	8.50961	8.49535	8.56308	8.48899	8.03948	8.06208	8.08438	7.92199	4.76104	4.67279	5.11199	4.61333	2.42876	2.54069	2.61853	2.02006
ENSMUSG00000042448	Hoxd1	chr2:74762979-74765141	+	1861	0.940899	9.527e-05	40.2104	0.940899	9.527e-05	40.2104	0	1	0	-	67	51	39	46	19	19	28	24	5.33183	5.25428	5.17485	5.23241	5.00546	5.00779	5.10356	5.0795	1.58448	1.27934	0.99687	1.19308	0.443806	0.454587	0.739759	0.660069
ENSMUSG00000045725	Prr15	chr6:54327011-54330200	+	1381	0.940769	6.11059e-09	82.1392	0.940769	6.11059e-09	82.1392	0	1	0	-	259	204	305	196	127	157	87	98	7.63606	7.51361	7.80803	7.51236	7.20204	7.32934	7.07238	7.1521	8.25402	6.89604	10.5057	6.85047	3.99757	5.06193	3.09745	3.63209
ENSMUSG00000039116	Gpr126	chr10:14402584-14545036	-	6505	0.94067	5.74401e-08	72.4078	0.94067	5.74401e-08	72.4078	0	1	0	-	110	105	102	88	48	53	39	54	6.33828	6.34439	6.33648	6.27543	6.00122	6.03866	5.97545	6.09903	0.744226	0.753538	0.745888	0.65297	0.32076	0.362776	0.294778	0.424885
ENSMUSG00000048583	Igf2	chr7:142650765-142666816	-	5723	0.940514	0.000129605	38.8738	0.940514	0.000129605	38.8738	0	1	0	-	1310	1239	1194	1024	658	406	335	706	10.0028	10.0066	9.98563	9.86975	9.42498	9.06954	9.00807	9.61171	10.0741	10.1067	9.92433	8.63642	4.99791	3.15873	2.87806	6.31401
ENSMUSG00000000125	Wnt3	chr11:103774149-103817957	+	3076	0.939801	0.00524902	22.7992	0.939801	0.00524902	22.7992	0	1	0	-	17	8	9	7	2	2	3	3	2.71886	2.64335	2.65413	2.63622	2.58198	2.58235	2.59621	2.59791	0.243233	0.121413	0.13918	0.109842	0.0282637	0.0289504	0.0479527	0.0499183
ENSMUSG00000066721	Zfp575	chr7:24583837-24587641	-	2741	0.939731	2.98814e-12	115.246	0.939731	2.98814e-12	115.246	0	1	0	-	185	173	160	156	91	79	82	79	7.12442	7.11928	7.07926	7.07849	6.74411	6.6871	6.75056	6.75404	2.97045	2.94646	2.77672	2.74709	1.44317	1.2833	1.4709	1.47517
ENSMUSG00000000876	Pxmp4	chr2:154585757-154603708	-	3114	0.939218	8.72429e-24	230.593	0.939218	8.72429e-24	230.593	0	1	0	-	447	462	388	392	221	232	197	195	8.48031	8.55438	8.42692	8.4539	7.98366	8.02385	7.9846	8.00638	6.31755	6.92607	5.92698	6.0761	3.08503	3.31726	3.11047	3.20509
ENSMUSG00000024793	Tnfrsf25	chr4:152115933-152120119	+	2277	0.939	2.33247e-06	56.3218	0.939	2.33247e-06	56.3218	0	1	0	-	88	97	66	84	30	43	43	41	6.02731	6.10151	5.93437	6.05	5.66837	5.76728	5.80002	5.79921	1.7009	1.98871	1.3788	1.78063	0.572722	0.840844	0.928504	0.921606
ENSMUSG00000045031	Cetn4	chr3:37307748-37312708	-	4032	0.936848	5.07245e-05	42.9478	0.936848	5.07245e-05	42.9478	0	1	0	-	57	46	69	47	30	29	17	24	5.37095	5.318	5.47217	5.33732	5.18807	5.18342	5.10311	5.17561	0.622177	0.532599	0.814046	0.562646	0.323435	0.320249	0.207304	0.30466
ENSMUSG00000024038	Ndufv3	chr17:31520114-31531321	+	1575	0.936725	1.07843e-43	429.672	0.936725	1.07843e-43	429.672	0	1	0	-	2220	2001	1751	1782	1107	1005	867	931	10.7935	10.7529	10.6431	10.6815	10.1911	10.1218	10.0842	10.178	62.0343	59.3102	52.8842	54.6116	30.5529	28.4116	27.0656	30.2548
ENSMUSG00000003546	Klc4	chr17:46630630-46645144	-	2322	0.936047	2.30954e-19	186.365	0.936047	2.30954e-19	186.365	0	1	0	-	369	350	337	369	165	210	166	171	8.21107	8.21619	8.19792	8.28622	7.67766	7.83376	7.75113	7.79652	6.99397	7.0367	6.9038	7.67047	3.08893	4.02687	3.51499	3.76928
ENSMUSG00000030703	Gdpd3	chr7:126766413-126775643	+	1066	0.935281	4.51021e-05	43.458	0.935281	4.51021e-05	43.458	-1.10924	1	0	chr7:126767176-126767312	73	68	53	48	30	41	19	21	5.57471	5.56912	5.47895	5.45294	5.29633	5.38132	5.23029	5.25761	3.01387	2.97793	2.36504	2.17341	1.22335	1.71252	0.876344	1.00829
ENSMUSG00000060176	Kif27	chr13:58287515-58354862	-	4462	0.935219	9.51518e-05	40.2158	0.935219	9.51518e-05	40.2158	0	1	0	-	45	60	44	39	26	23	20	16	5.11334	5.23167	5.12865	5.09922	4.97757	4.95601	4.95047	4.92141	0.443856	0.627747	0.469076	0.421884	0.253297	0.229514	0.220383	0.183533
ENSMUSG00000024900	Cpt1a	chr19:3323300-3385732	+	4300	0.934706	2.43435e-55	546.136	0.934706	2.43435e-55	546.136	-1.04463	2.50236e-32	316.017	chr19:3366329-3366417	1941	1843	1892	1758	922	1076	920	847	10.6491	10.6567	10.6938	10.6487	10.0181	10.1557	10.1097	10.0774	19.8663	20.0088	20.9302	19.7337	9.3207	11.1418	10.5196	10.0818
ENSMUSG00000041696	Rasl12	chr9:65398487-65414853	+	3877	0.934044	0.000113667	39.4437	0.934044	0.000113667	39.4437	0	1	0	-	36	46	51	49	23	18	22	19	5.01791	5.10526	5.1434	5.13775	4.92259	4.88391	4.93711	4.91884	0.408664	0.553892	0.625741	0.61004	0.25788	0.206722	0.279001	0.250832
ENSMUSG00000090215	Trim34b	chr7:104300229-104336909	+	2068	0.933405	0.00411744	23.8537	0.933405	0.00411744	23.8537	0	1	0	-	23	10	20	15	3	8	8	4	3.5582	3.45397	3.54553	3.50475	3.38385	3.43238	3.44077	3.40214	0.489482	0.225742	0.460045	0.350105	0.0630604	0.172246	0.190203	0.0989997
ENSMUSG00000005360	Slc1a3	chr15:8634123-8710764	-	8537	0.932522	3.45366e-17	164.617	0.932522	3.45366e-17	164.617	-1.04433	0.192662	7.15203	chr15:8687897-8688425	270	271	256	278	137	138	131	131	7.77114	7.81615	7.7853	7.86209	7.35347	7.36484	7.39379	7.41883	1.39193	1.48193	1.42645	1.5718	0.697592	0.719754	0.754474	0.7854
ENSMUSG00000020017	Hal	chr10:93488767-93519304	+	5549	0.932363	6.21261e-16	152.067	0.932363	6.21261e-16	152.067	0	1	0	-	986	825	948	810	396	619	399	371	9.61847	9.51509	9.64899	9.53239	8.8953	9.24772	8.9854	8.96406	7.82027	6.94069	8.1267	7.04576	3.10218	4.96691	3.53538	3.42203
ENSMUSG00000070867	Trabd2b	chr4:114406723-114615098	+	6617	0.932139	7.09564e-09	81.4901	0.932139	7.09564e-09	81.4901	0	1	0	-	198	222	254	140	113	105	87	92	7.32003	7.43559	7.53959	7.16709	7.00335	6.97298	6.93302	6.98157	1.31693	1.56623	1.82597	1.02123	0.742341	0.706543	0.646452	0.711625
ENSMUSG00000053898	Ech1	chr7:28825216-28832247	+	2284	0.931675	4.48054e-33	323.487	0.931675	4.48054e-33	323.487	0	1	0	-	878	857	772	814	414	462	371	429	9.48132	9.51244	9.43396	9.50092	8.88871	8.98038	8.89299	9.03465	16.9183	17.5165	16.0784	17.2023	7.87935	9.0065	7.98649	9.61359
ENSMUSG00000079547	H2-DMb1	chr17:34153071-34160223	+	1478	0.929596	3.35611e-16	154.742	0.929596	3.35611e-16	154.742	0	1	0	-	412	369	342	332	154	223	187	162	8.30885	8.26935	8.2217	8.21761	7.65096	7.88569	7.83803	7.7763	12.2682	11.6551	11.0071	10.8423	4.52931	6.71801	6.22079	5.61003
ENSMUSG00000074749	Plk1s1	chr2:146855863-146970097	+	2278	0.928579	2.07558e-33	326.829	0.928579	2.07558e-33	326.829	0	1	0	-	647	636	598	559	317	330	299	289	9.03077	9.06666	9.02652	8.99066	8.49126	8.52893	8.53153	8.53848	12.5	13.0337	12.4873	11.8445	6.04911	6.45016	6.45351	6.49335
ENSMUSG00000021591	Glrx	chr13:75839867-75850151	+	1345	0.926847	1.00621e-15	149.973	0.926847	1.00621e-15	149.973	0	1	0	-	284	246	274	233	156	135	118	111	7.77696	7.71719	7.80374	7.70582	7.39594	7.32149	7.30511	7.29648	9.29299	8.53839	9.69056	8.36164	5.04183	4.46912	4.31358	4.22401
ENSMUSG00000086283	2810433D01Rik	chr11:102619795-102624416	-	1205	0.925779	0.00593321	22.2671	0.925779	0.00593321	22.2671	0	1	0	-	13	11	10	9	4	5	2	1	2.79088	2.7789	2.77081	2.76331	2.70952	2.71979	2.69349	2.68372	0.474806	0.426156	0.39476	0.360507	0.144298	0.184754	0.0816059	0.0424754
ENSMUSG00000035944	Ttc38	chr15:85832305-85858822	+	3842	0.925351	1.93514e-07	67.1329	0.925351	1.93514e-07	67.1329	0	1	0	-	113	102	130	104	50	62	41	64	6.45664	6.43437	6.57197	6.46358	6.11939	6.20025	6.09613	6.27141	1.29444	1.23938	1.60956	1.30657	0.565716	0.718529	0.524692	0.852604
ENSMUSG00000034209	Rasl10a	chr11:5058127-5060385	+	1413	0.925011	4.21893e-05	43.748	0.925011	4.21893e-05	43.748	0	1	0	-	56	54	55	46	26	33	22	17	5.33038	5.33801	5.34941	5.29589	5.12285	5.18021	5.11424	5.07727	1.74424	1.78408	1.85157	1.57135	0.799866	1.03988	0.765524	0.615788
ENSMUSG00000030699	Tbx6	chr7:126781482-126785560	+	1804	0.924884	0.00604386	22.1869	0.924884	0.00604386	22.1869	0	1	0	-	9	9	14	9	2	4	2	3	2.6901	2.69489	2.74266	2.69803	2.62466	2.64476	2.62806	2.64045	0.219566	0.2329	0.369158	0.240804	0.0481925	0.0987265	0.0545095	0.0851156
ENSMUSG00000024235	Map3k8	chr18:4331326-4353015	-	4504	0.924663	3.68318e-06	54.3378	0.924663	3.68318e-06	54.3378	-1.17245	1	0	chr18:4352851-4353015	151	123	97	124	47	88	64	37	6.69571	6.61183	6.49439	6.6372	6.17736	6.4257	6.33194	6.1588	1.4755	1.27488	1.02446	1.32887	0.453613	0.86995	0.69865	0.420463
ENSMUSG00000054723	Vmac	chr17:56713931-56717699	-	2276	0.923461	4.04289e-11	103.933	0.923461	4.04289e-11	103.933	0	1	0	-	227	221	156	216	103	114	101	89	7.42674	7.44861	7.23352	7.45868	6.97436	7.03202	7.02328	6.98304	4.38948	4.53297	3.26041	4.58078	1.96721	2.23019	2.18186	2.00144
ENSMUSG00000032271	Nnmt	chr9:48591876-48605153	-	1576	0.923314	1.97448e-25	247.045	0.923314	1.97448e-25	247.045	0	1	0	-	681	650	593	515	305	351	292	286	9.07197	9.08313	9.01752	8.92132	8.46214	8.57115	8.5126	8.52889	19.0174	19.254	17.8986	15.7728	8.41259	9.91656	9.10972	9.28826
ENSMUSG00000028104	Polr3gl	chr3:96577871-96594181	-	1597	0.923119	2.25919e-18	176.46	0.923119	2.25919e-18	176.46	0	1	0	-	501	459	470	410	253	280	173	223	8.63051	8.60801	8.63826	8.54852	8.13443	8.21269	7.96693	8.15682	13.8068	13.4175	13.9995	12.3919	6.88655	7.80662	5.32623	7.14701
ENSMUSG00000000552	Zfp385a	chr15:103313894-103340086	-	2291	0.922796	1.29406e-48	478.88	0.922796	1.29406e-48	478.88	1.13091	0.00128054	28.9261	chr15:103333064-103333200	1809	1722	1478	1571	927	907	754	771	10.5198	10.5297	10.4032	10.4808	9.95011	9.94285	9.87534	9.92839	34.7515	35.089	30.6881	33.0985	17.589	17.6276	16.1817	17.2248
ENSMUSG00000025791	Pgm2	chr4:99929413-99987294	+	2921	0.922485	4.41839e-54	533.547	0.922485	4.41839e-54	533.547	0	1	0	-	1702	1665	1658	1516	908	884	733	816	10.4617	10.4965	10.5054	10.446	9.93064	9.91936	9.85021	9.97227	25.6441	26.6101	27.0006	25.051	13.5126	13.4751	12.3382	14.2983
ENSMUSG00000028028	Alpk1	chr3:127670398-127780527	-	6709	0.922206	1.06277e-06	59.7356	0.922206	1.06277e-06	59.7356	0	1	0	-	89	77	100	71	39	46	39	38	6.04803	6.00925	6.13887	5.99045	5.75104	5.80401	5.78616	5.79208	0.583837	0.535792	0.709027	0.510809	0.252693	0.305288	0.285815	0.289901
ENSMUSG00000076441	Ass1	chr2:31470206-31520672	+	2307	0.921469	2.87323e-09	85.4163	0.921469	2.87323e-09	85.4163	0	1	0	-	144	131	118	109	69	60	60	58	6.70342	6.68283	6.63245	6.60284	6.35213	6.30362	6.34394	6.34837	2.7471	2.65086	2.43307	2.28053	1.30013	1.15801	1.27874	1.28678
ENSMUSG00000047878	A4galt	chr15:83226725-83251774	-	2171	0.921056	0.00580226	22.364	0.921056	0.00580226	22.364	0	1	0	-	7	6	11	7	2	1	1	2	2.19882	2.19283	2.24173	2.20502	2.15167	2.14198	2.14381	2.15581	0.141905	0.129019	0.24102	0.155631	0.0400457	0.0205093	0.0226474	0.0471514
ENSMUSG00000035642	Aamdc	chr7:97550330-97579497	-	1615	0.921026	3.37287e-10	94.72	0.921026	3.37287e-10	94.72	0	1	0	-	163	133	152	136	68	81	76	64	6.91999	6.83534	6.92147	6.86982	6.49141	6.56984	6.58771	6.53387	4.44196	3.84452	4.47705	4.06466	1.8303	2.23317	2.31377	2.0283
ENSMUSG00000040883	Tmem205	chr9:21921009-21927535	-	862	0.920874	5.66755e-13	122.466	0.920874	5.66755e-13	122.466	0	1	0	-	273	284	219	207	122	127	115	126	7.70499	7.77617	7.60259	7.58098	7.2146	7.24301	7.24576	7.32004	13.9385	15.3806	12.0853	11.591	6.15232	6.56004	6.55947	7.48149
ENSMUSG00000020319	Wdpcp	chr11:21572234-21898989	+	5934	0.920785	9.69936e-14	130.133	0.920785	9.69936e-14	130.133	-1.17909	1	0	chr11:21652224-21652310	228	190	215	212	107	107	108	101	7.46132	7.38003	7.47088	7.47765	7.02594	7.03262	7.09053	7.07891	1.69101	1.49475	1.7235	1.72443	0.783831	0.802872	0.894859	0.871161
ENSMUSG00000028664	Ephb2	chr4:136647538-136835988	-	12608	0.920397	8.60445e-46	450.653	0.920397	8.60445e-46	450.653	-1.40932	6.8243e-07	61.6594	chr4:136774576-136774640	1360	1324	1227	1222	727	662	579	653	10.1243	10.1543	10.0983	10.1166	9.60274	9.53857	9.51335	9.64331	4.74736	4.90236	4.62934	4.67824	2.50654	2.33788	2.25793	2.65089
ENSMUSG00000039159	Ube2h	chr6:30211288-30304539	-	4780	0.919213	1.99434e-56	557.002	0.919213	1.99434e-56	557.002	0	1	0	-	2459	2311	2235	2060	1214	1273	1020	1131	10.9753	10.9736	10.9555	10.9028	10.3655	10.416	10.3161	10.438	22.6407	22.5702	22.2418	20.8016	11.0402	11.858	10.4918	12.1104
ENSMUSG00000053030	Spink2	chr5:77205106-77211471	-	788	0.91901	0.000895054	30.4815	0.91901	0.000895054	30.4815	0	1	0	-	37	29	27	27	13	11	10	17	4.49392	4.4475	4.43437	4.43961	4.30456	4.28803	4.29042	4.3647	2.0665	1.71805	1.62989	1.65385	0.717139	0.621551	0.623953	1.1042
ENSMUSG00000028164	Manba	chr3:135485610-135571404	+	6971	0.91861	1.31573e-43	428.808	0.91861	1.31573e-43	428.808	0	1	0	-	1001	889	919	879	479	509	474	423	9.66178	9.61037	9.65156	9.63396	9.06968	9.12582	9.14926	9.09565	6.31973	5.95347	6.27106	6.08627	2.98694	3.25112	3.34319	3.10577
ENSMUSG00000052605	Isoc2b	chr7:4844958-4866193	-	1297	0.918042	0.000548274	32.61	0.918042	0.000548274	32.61	-1.16896	1	0	chr7:4849334-4849567	54	35	28	32	20	15	13	17	4.87609	4.76118	4.70954	4.7475	4.63162	4.59061	4.5871	4.63238	1.83237	1.25977	1.02692	1.19088	0.670311	0.514946	0.492813	0.670863
ENSMUSG00000047557	Lxn	chr3:67457997-67463926	-	1508	0.916544	2.09246e-34	336.793	0.916544	2.09246e-34	336.793	0	1	0	-	1673	1517	1398	1400	859	741	662	791	10.3968	10.3622	10.3007	10.3242	9.83068	9.72211	9.71341	9.89234	48.8263	46.9621	44.0988	44.811	24.7616	21.879	21.5842	26.8472
ENSMUSG00000066113	Adamtsl1	chr4:86053914-86428385	+	10870	0.916377	6.38565e-10	91.948	0.916377	6.38565e-10	91.948	0	1	0	-	205	217	182	174	76	126	99	85	7.31453	7.39182	7.28465	7.27135	6.79126	7.03972	6.9675	6.91511	0.830011	0.931952	0.796457	0.77264	0.303928	0.516121	0.4478	0.400234
ENSMUSG00000089762	Ier5l	chr2:30472647-30474199	-	1552	0.915672	1.89191e-24	237.231	0.915672	1.89191e-24	237.231	0	1	0	-	1458	1370	1045	1247	610	728	639	622	10.183	10.1809	9.95181	10.1304	9.45977	9.60942	9.58618	9.59934	41.3452	41.209	32.0291	38.7822	17.0854	20.8857	20.2436	20.5127
ENSMUSG00000040289	Hey1	chr3:8663361-8667039	-	2203	0.913774	0.000474315	33.2393	0.913774	0.000474315	33.2393	0	1	0	-	51	29	39	36	22	21	16	10	4.91167	4.76959	4.85006	4.83401	4.70341	4.69752	4.67101	4.61875	1.01886	0.614535	0.842113	0.788762	0.434104	0.424439	0.357095	0.232333
ENSMUSG00000028980	H6pd	chr4:149979474-150009023	-	5236	0.911995	1.06716e-61	609.718	0.911995	1.06716e-61	609.718	0	1	0	-	3497	3447	3191	3124	1701	1799	1781	1536	11.5033	11.5464	11.4869	11.49	10.8741	10.9324	11.0104	10.9207	29.3938	30.733	28.99	28.7985	14.1218	15.2982	16.7241	15.0147
ENSMUSG00000052396	Mogat2	chr7:99219083-99238619	-	1835	0.91183	1.22935e-14	139.103	0.91183	1.22935e-14	139.103	0	1	0	-	372	336	272	309	144	190	168	148	8.14498	8.11263	7.96702	8.07814	7.52404	7.69534	7.68267	7.63291	8.92209	8.54804	7.05104	8.12793	3.41124	4.61028	4.50144	4.1281
ENSMUSG00000028758	Kif17	chr4:138250434-138301967	+	4582	0.910199	0.00359067	24.4482	0.910199	0.00359067	24.4482	0	1	0	-	19	31	16	15	8	9	6	8	3.80356	3.91215	3.78834	3.78258	3.70779	3.71836	3.69731	3.72191	0.182498	0.315842	0.166106	0.158013	0.0758964	0.0874576	0.0643835	0.0893634
ENSMUSG00000087067	Gm11532	chr11:97020507-97026248	-	5272	0.909459	0.00485886	23.1347	0.909459	0.00485886	23.1347	0	1	0	-	17	13	20	17	3	8	9	4	3.52036	3.49259	3.55722	3.53425	3.39344	3.44268	3.46132	3.41208	0.141917	0.115115	0.180458	0.155644	0.0247361	0.0675655	0.0839355	0.0388337
ENSMUSG00000059479	B3gnt8	chr7:25627623-25629490	+	1475	0.909151	0.00108452	29.6476	0.909151	0.00108452	29.6476	0	1	0	-	29	33	24	28	13	11	15	10	4.37553	4.41931	4.35087	4.38875	4.2472	4.2309	4.28092	4.23807	0.865298	1.04444	0.773998	0.916271	0.383122	0.332056	0.500009	0.347003
ENSMUSG00000028672	Hmgcl	chr4:135946447-135962617	+	2434	0.908794	1.92301e-45	447.16	0.908794	1.92301e-45	447.16	0	1	0	-	1468	1334	1215	1226	762	710	603	626	10.2067	10.1744	10.1029	10.1329	9.65527	9.60891	9.56011	9.6241	26.5439	25.5858	23.7452	24.3124	13.6088	12.9882	12.1808	13.1637
ENSMUSG00000020871	Dlx4	chr11:95140455-95146263	-	3260	0.907528	1.8535e-22	217.32	0.907528	1.8535e-22	217.32	0	1	0	-	802	719	669	626	370	433	364	276	9.30367	9.26112	9.21154	9.17611	8.69846	8.82478	8.77084	8.60444	10.8272	10.2961	9.76178	9.26861	4.93367	5.91399	5.48987	4.33327
ENSMUSG00000046460	Sh2d7	chr9:54538983-54545020	+	2759	0.906552	0.00433595	23.6292	0.906552	0.00433595	23.6292	0	1	0	-	20	19	21	29	7	7	3	16	3.93115	3.93229	3.95204	4.02426	3.81718	3.81825	3.78455	3.92203	0.319035	0.321488	0.362066	0.507346	0.110289	0.112968	0.0534623	0.29682
ENSMUSG00000020607	Fam84a	chr12:14147598-14152038	-	3379	0.905816	1.88118e-19	187.256	0.905816	1.88118e-19	187.256	0	1	0	-	1016	746	774	827	414	523	435	347	9.61714	9.40039	9.44377	9.52225	8.89703	9.08403	9.0201	8.88468	13.2332	10.3066	10.8962	11.8134	5.32596	6.89166	6.32965	5.25613
ENSMUSG00000026821	Ralgds	chr2:28513124-28553081	+	6159	0.905589	3.2083e-35	344.937	0.905589	3.2083e-35	344.937	0	1	0	-	687	671	641	636	377	355	327	300	9.135	9.1657	9.13875	9.15272	8.67322	8.63899	8.65347	8.62314	4.90915	5.08599	4.95072	4.98431	2.66083	2.56642	2.61045	2.49308
ENSMUSG00000030761	Myo7a	chr7:98051059-98119524	-	8524	0.905548	5.14411e-05	42.8869	0.905548	5.14411e-05	42.8869	0	1	0	-	52	81	92	65	41	29	29	38	5.66554	5.86354	5.92955	5.7849	5.59596	5.51031	5.53656	5.62165	0.268485	0.443614	0.513411	0.368068	0.209087	0.151483	0.167276	0.228173
ENSMUSG00000029007	Agtrap	chr4:148077060-148088031	-	4236	0.905181	1.06565e-22	219.724	0.905181	1.06565e-22	219.724	0	1	0	-	655	589	509	508	274	326	283	273	8.99381	8.95475	8.84585	8.8641	8.33989	8.46974	8.44189	8.44738	6.80526	6.49116	5.71587	5.78849	2.81178	3.42667	3.2848	3.29861
ENSMUSG00000085639	Gm15410	chr5:148946591-148948866	-	544	0.904171	0.00588577	22.302	0.904171	0.00588577	22.302	0	1	0	-	14	6	9	3	0	3	1	1	2.23039	2.16086	2.19123	2.13194	2.09892	2.12955	2.11118	2.112	1.13263	0.514891	0.786981	0.266183	0	0.245546	0.0903815	0.0940862
ENSMUSG00000062542	Syt9	chr7:107370727-107548656	+	3979	0.903719	0.00709671	21.4894	0.903719	0.00709671	21.4894	0	1	0	-	15	20	12	12	1	8	8	1	3.26715	3.31889	3.24859	3.25126	3.13709	3.20644	3.21463	3.14167	0.165912	0.234649	0.143459	0.145568	0.0109248	0.0895213	0.098854	0.0128632
ENSMUSG00000024654	Asrgl1	chr19:9109867-9135636	-	4297	0.903175	8.14295e-26	250.892	0.903175	8.14295e-26	250.892	0	1	0	-	507	520	526	494	263	287	243	260	8.72117	8.79029	8.81106	8.77955	8.24664	8.31518	8.27154	8.34799	5.19281	5.64939	5.82292	5.54906	2.66058	2.9739	2.78048	3.09694
ENSMUSG00000018554	Ybx2	chr11:69935795-69941605	+	1885	0.902099	0.00750612	21.2458	0.902099	0.00750612	21.2458	0	1	0	-	10	14	12	7	1	4	3	4	2.77639	2.81839	2.80162	2.75563	2.692	2.72202	2.71609	2.72873	0.233479	0.346721	0.302824	0.179244	0.0230608	0.0944841	0.0782507	0.108611
ENSMUSG00000097320	C630016N16Rik	chr7:30729578-30745929	+	1416	0.90186	9.44651e-06	50.2473	0.90186	9.44651e-06	50.2473	0	1	0	-	80	62	63	70	34	43	31	25	5.78379	5.70289	5.71444	5.76716	5.49774	5.56637	5.50532	5.46596	2.48649	2.04405	2.1164	2.38612	1.04376	1.35212	1.07641	0.903652
ENSMUSG00000047692	4930533K18Rik	chr10:70868668-70934324	+	1259	0.901637	1.67099e-28	277.77	0.901637	1.67099e-28	277.77	0	1	0	-	740	683	659	580	354	352	317	346	9.2035	9.18617	9.16757	9.081	8.63331	8.63864	8.63696	8.73246	25.8682	25.3255	24.8989	22.2362	12.2226	12.4488	12.3798	14.0661
ENSMUSG00000025328	Padi3	chr4:140785364-140810648	-	3447	0.900247	3.78526e-05	44.219	0.900247	3.78526e-05	44.219	0	1	0	-	62	53	67	70	29	34	21	36	5.58215	5.54646	5.64074	5.66874	5.36104	5.4025	5.32115	5.45857	0.791608	0.717791	0.9246	0.9802	0.365715	0.439185	0.299541	0.534547
ENSMUSG00000058624	Gda	chr19:21391306-21473445	-	6135	0.900048	9.9003e-08	70.0435	0.900048	9.9003e-08	70.0435	0	1	0	-	137	139	171	105	70	71	77	56	6.7642	6.8062	6.93996	6.67296	6.44747	6.45871	6.53801	6.42546	0.982801	1.0577	1.32587	0.8261	0.495986	0.515293	0.617099	0.467195
ENSMUSG00000089944	Gm8292	chr1:55335366-55335883	+	517	0.899825	2.40351e-22	216.192	0.899825	2.40351e-22	216.192	0	1	0	-	880	692	673	633	402	419	363	297	9.39867	9.24286	9.23104	9.19998	8.77477	8.81532	8.78434	8.67146	74.912	62.4854	61.922	59.0977	33.8004	36.0856	34.5219	29.4029
ENSMUSG00000079659	Tmem243	chr5:9100736-9118983	+	988	0.899144	3.41674e-14	134.664	0.899144	3.41674e-14	134.664	0	1	0	-	236	251	240	234	126	127	107	130	7.59596	7.67976	7.65795	7.65712	7.22418	7.23554	7.20058	7.33018	10.5127	11.8599	11.5551	11.4319	5.5437	5.72344	5.32482	6.73459
ENSMUSG00000047428	Dlk2	chr17:46297420-46303271	+	2113	0.899081	8.06256e-13	120.935	0.899081	8.06256e-13	120.935	0	1	0	-	288	289	222	229	134	122	143	122	7.78458	7.83017	7.65348	7.69135	7.30757	7.26452	7.41013	7.34496	5.99864	6.38501	4.99774	5.23111	2.75671	2.57081	3.32748	2.95519
ENSMUSG00000030170	Wnt5b	chr6:119432530-119544347	-	2654	0.898706	4.17735e-10	93.791	0.898706	4.17735e-10	93.791	0	1	0	-	275	274	248	262	123	172	154	87	7.77027	7.81024	7.74892	7.80523	7.28061	7.47832	7.47308	7.1918	4.56028	4.81962	4.44499	4.76495	2.01461	2.88561	2.85298	1.67781
ENSMUSG00000019734	Tmc4	chr7:3665789-3677524	-	3859	0.898412	9.39e-10	90.2733	0.898412	9.39e-10	90.2733	0	1	0	-	174	154	144	124	87	78	65	70	6.98231	6.94358	6.9117	6.8398	6.61852	6.57628	6.54465	6.59437	1.98442	1.86298	1.77504	1.55097	0.98001	0.899974	0.828165	0.928427
ENSMUSG00000063714	1700011J10Rik	chr2:72979423-72988677	+	892	0.897867	9.0152e-09	80.4502	0.897867	9.0152e-09	80.4502	0	1	0	-	197	140	141	131	75	85	64	80	7.06932	6.90125	6.91316	6.88507	6.5737	6.63188	6.55879	6.67094	9.71988	7.327	7.51925	7.08866	3.65496	4.24291	3.52771	4.59039
ENSMUSG00000099060	mmu-mir-7025	chr5:75176830-75176904	+	74	0.896827	0.003815	24.1851	0.896827	0.003815	24.1851	0	1	0	-	16	16	32	24	12	9	8	6	3.90246	3.91093	4.04788	3.98747	3.86907	3.84274	3.84255	3.8254	9.51585	10.0937	20.5702	15.6544	7.04913	5.41528	5.31541	4.14996
ENSMUSG00000030321	Efcab12	chr6:115810728-115838412	-	2663	0.89621	0.00791318	21.0165	0.89621	0.00791318	21.0165	0	1	0	-	17	13	9	6	0	7	2	2	2.83595	2.80822	2.77228	2.74462	2.68114	2.74987	2.7045	2.70587	0.280955	0.227895	0.160765	0.108752	0	0.117041	0.0369264	0.03844
ENSMUSG00000031594	Fgl1	chr8:41191433-41215156	-	4434	0.895897	0.000999285	30.0031	0.895897	0.000999285	30.0031	0	1	0	-	29	36	40	28	20	13	17	9	4.57566	4.64237	4.67522	4.58938	4.50724	4.44927	4.50025	4.42927	0.287847	0.379027	0.429126	0.304804	0.196074	0.130544	0.188509	0.103889
ENSMUSG00000030087	Klf15	chr6:90462575-90475238	+	2527	0.89501	0.00235249	26.2847	0.89501	0.00235249	26.2847	0	1	0	-	29	25	28	18	13	13	11	5	4.1898	4.17048	4.19745	4.11766	4.06156	4.06315	4.05667	3.99993	0.505071	0.461847	0.527076	0.343815	0.223627	0.229059	0.214026	0.101272
ENSMUSG00000074227	Spint2	chr7:29256330-29281977	-	1459	0.894585	7.2193e-12	111.415	0.894585	7.2193e-12	111.415	0	1	0	-	372	334	320	262	145	204	179	127	8.14443	8.10752	8.0856	7.957	7.5269	7.7396	7.72133	7.54446	11.2214	10.687	10.4331	8.6677	4.32015	6.22566	6.0322	4.45526
ENSMUSG00000044164	Rnf182	chr13:43615709-43670945	+	3609	0.893708	0.0049682	23.038	0.893708	0.0049682	23.038	0	1	0	-	28	17	16	18	12	8	2	8	3.83221	3.75281	3.74593	3.76732	3.70291	3.66766	3.61437	3.68032	0.341453	0.2199	0.210889	0.240737	0.144537	0.0986991	0.0272472	0.113456
ENSMUSG00000021534	1700001L19Rik	chr13:68597438-68614231	+	1808	0.89332	0.00779287	21.083	0.89332	0.00779287	21.083	0	1	0	-	10	7	7	8	3	2	2	0	2.28946	2.26591	2.2668	2.27827	2.2249	2.21543	2.2181	2.19685	0.243423	0.180744	0.184171	0.213574	0.0721288	0.049254	0.0543889	0
ENSMUSG00000049775	Tmsb4x	chrX:167207092-167209315	-	1371	0.891921	2.76625e-49	485.581	0.891921	2.76625e-49	485.581	0	1	0	-	78706	65506	65098	61958	38165	40395	30635	32386	15.9598	15.8406	15.848	15.8242	15.2981	15.3605	15.2043	15.2914	2526.56	2230.52	2258.66	2181.31	1210.08	1311.9	1098.65	1209.05
ENSMUSG00000023959	Clic5	chr17:44188571-44280168	+	5870	0.891326	0.000209709	36.7838	0.891326	0.000209709	36.7838	0	1	0	-	71	59	46	61	21	42	32	16	5.55014	5.50008	5.41764	5.52709	5.21102	5.37518	5.32819	5.19745	0.532329	0.469221	0.372769	0.501591	0.155513	0.318582	0.268034	0.13951
ENSMUSG00000024747	Aldh1a7	chr19:20692952-20727562	-	2066	0.890634	1.70291e-08	77.6881	0.890634	1.70291e-08	77.6881	0	1	0	-	186	128	143	154	91	72	61	83	7.04534	6.85751	6.92883	6.9876	6.66024	6.56387	6.54082	6.69234	3.96225	2.8923	3.2925	3.59789	1.91468	1.55172	1.4517	2.05623
ENSMUSG00000097002	Gm2670	chr14:28508073-28511392	-	2804	0.890596	0.00293466	25.3244	0.890596	0.00293466	25.3244	0	1	0	-	29	19	19	23	8	9	12	8	4.0538	3.98415	3.98637	4.02495	3.88032	3.89074	3.92998	3.89472	0.455176	0.316329	0.322327	0.39592	0.124022	0.142914	0.210417	0.146028
ENSMUSG00000052911	Lamb2	chr9:108479861-108490530	+	5624	0.890152	1.40703e-57	568.517	0.890152	1.40703e-57	568.517	0	1	0	-	4907	5070	4400	4331	2467	2733	2356	2222	12.0005	12.0888	11.9676	11.9758	11.3939	11.4936	11.4523	11.439	38.3999	42.0849	37.2158	37.1707	19.0682	21.6374	20.5972	20.222
ENSMUSG00000058579	Cela2a	chr4:141814961-141826160	-	1723	0.890063	0.00366276	24.3619	0.890063	0.00366276	24.3619	0	1	0	-	23	26	19	14	9	9	8	7	3.8745	3.91001	3.85325	3.81151	3.75556	3.75677	3.7564	3.74989	0.587492	0.704452	0.524552	0.392194	0.227061	0.232577	0.228288	0.20794
ENSMUSG00000062478	Ctrc	chr4:141814961-141846359	-	1428	0.890063	0.00366276	24.3619	0.890063	0.00366276	24.3619	0	1	0	-	23	26	19	14	9	9	8	7	3.8745	3.91001	3.85325	3.81151	3.75556	3.75677	3.7564	3.74989	0.708858	0.849979	0.632916	0.473214	0.273968	0.280624	0.275448	0.250896
ENSMUSG00000090964	Gm17206	chr15:83102071-83105929	-	577	0.889901	6.14796e-05	42.1127	0.889901	6.14796e-05	42.1127	0	1	0	-	67	63	74	61	49	36	21	22	5.66347	5.66225	5.73408	5.66421	5.55624	5.46894	5.37301	5.39167	5.11044	5.09716	6.10065	5.10284	3.69153	2.77803	1.78946	1.95151
ENSMUSG00000004864	Mapk13	chr17:28769306-28778698	+	1512	0.888026	0.00300664	25.2192	0.888026	0.00300664	25.2192	0	1	0	-	31	23	19	23	11	16	6	7	4.14714	4.0964	4.06486	4.10345	3.98616	4.0319	3.94914	3.96312	0.902338	0.710132	0.597754	0.734233	0.316247	0.471171	0.195109	0.236958
ENSMUSG00000025176	Hoga1	chr19:42045609-42070953	+	2259	0.887892	1.13297e-05	49.4578	0.887892	1.13297e-05	49.4578	-1.22519	1	0	chr19:42059888-42060016	79	60	68	62	34	30	35	32	5.76142	5.6734	5.72825	5.70059	5.48092	5.45402	5.52033	5.50844	1.53911	1.23993	1.4319	1.32475	0.654257	0.59131	0.761781	0.725034
ENSMUSG00000079362	Gbp6	chr5:105270703-105293699	-	4314	0.887887	0.000794796	30.9974	0.887887	0.000794796	30.9974	0	1	0	-	44	57	64	32	13	21	27	27	5.15632	5.26285	5.31251	5.09476	4.91659	4.98843	5.06107	5.07139	0.448882	0.616819	0.7057	0.358037	0.130993	0.216745	0.307724	0.320338
ENSMUSG00000019539	Rcn3	chr7:45082912-45092221	-	1604	0.88726	4.39186e-42	413.574	0.88726	4.39186e-42	413.574	0	1	0	-	11208	10549	9581	9444	5997	5581	4428	5307	13.1718	13.1715	13.0928	13.1025	12.6077	12.5556	12.4421	12.6384	307.527	307.022	284.136	284.19	162.523	154.924	135.732	169.344
ENSMUSG00000044313	Mab21l3	chr3:101813075-101848959	-	3610	0.886805	3.43032e-08	74.6467	0.886805	3.43032e-08	74.6467	0	1	0	-	149	119	106	129	62	70	55	66	6.7332	6.63964	6.5857	6.70533	6.32081	6.3734	6.32131	6.41048	1.81651	1.53887	1.39675	1.72481	0.74657	0.863378	0.74909	0.935753
ENSMUSG00000024778	Fas	chr19:34290658-34327770	+	1801	0.886235	4.65322e-24	233.322	0.886235	4.65322e-24	233.322	0	1	0	-	571	540	540	501	331	313	233	246	8.8525	8.85576	8.86717	8.82563	8.44299	8.41236	8.28047	8.34655	13.9535	13.9973	14.2627	13.4271	7.98914	7.73822	6.36093	6.99111
ENSMUSG00000044674	Fzd1	chr5:4753841-4758216	-	4375	0.882986	4.28956e-21	203.676	0.882986	4.28956e-21	203.676	0	1	0	-	1234	1202	1362	1015	614	721	664	509	10.004	10.0342	10.1599	9.9184	9.43278	9.57047	9.58577	9.41048	12.4136	12.826	14.8088	11.1981	6.10065	7.33783	7.46223	5.95476
ENSMUSG00000025420	Katnal2	chr18:76977147-77047308	-	4061	0.882698	8.6812e-07	60.6142	0.882698	8.6812e-07	60.6142	0	1	0	-	99	133	109	94	55	56	44	62	6.37118	6.55336	6.45511	6.39307	6.13669	6.14752	6.10407	6.24092	1.07291	1.52891	1.27677	1.11726	0.588729	0.613996	0.532719	0.781418
ENSMUSG00000029413	Naaa	chr5:92257658-92278170	-	3721	0.882489	3.56443e-25	244.48	0.882489	3.56443e-25	244.48	0	1	0	-	864	803	727	685	467	367	379	391	9.42933	9.41775	9.34414	9.31431	8.93803	8.76937	8.86734	8.92323	10.2191	10.0744	9.29384	8.88564	5.45561	4.39154	5.00793	5.37826
ENSMUSG00000030035	Wbp1	chr6:83119043-83121559	-	2079	0.881283	3.54211e-29	284.507	0.881283	3.54211e-29	284.507	0	1	0	-	1305	1222	1072	1071	708	594	529	610	10.0389	10.0337	9.92939	9.95021	9.52884	9.40028	9.38949	9.53578	27.6258	27.4397	24.5279	24.8652	14.8035	12.7216	12.5106	15.0176
ENSMUSG00000072772	Grcc10	chr6:124739182-124741374	-	1988	0.881035	7.88755e-34	331.031	0.881035	7.88755e-34	331.031	0	1	0	-	1729	1589	1454	1395	867	854	682	824	10.4493	10.427	10.359	10.3437	9.86332	9.86157	9.76273	9.95097	38.277	37.3139	34.7911	33.87	18.9578	19.1272	16.8673	21.2146
ENSMUSG00000038560	Sp6	chr11:97013393-97024734	+	3841	0.880031	0.00713056	21.4688	0.880031	0.00713056	21.4688	0	1	0	-	14	12	19	16	3	7	8	4	3.37444	3.36334	3.42769	3.4046	3.27458	3.31375	3.33141	3.29264	0.160414	0.145848	0.235304	0.201064	0.0339518	0.0811454	0.102406	0.0533016
ENSMUSG00000070570	Slc17a7	chr7:45163920-45176138	+	2939	0.879993	0.00469279	23.2857	0.879993	0.00469279	23.2857	0	1	0	-	22	19	21	16	4	11	9	7	3.80114	3.78572	3.80529	3.76468	3.64269	3.71005	3.70111	3.68444	0.329445	0.301799	0.339891	0.262771	0.0591625	0.166649	0.150564	0.121905
ENSMUSG00000097075	D830044I16Rik	chr7:126971719-126976098	-	2054	0.878994	0.00631286	21.9977	0.878994	0.00631286	21.9977	0	1	0	-	15	17	18	14	5	5	9	5	3.46352	3.4888	3.49954	3.46683	3.37436	3.37513	3.42203	3.38409	0.321403	0.386377	0.416862	0.328992	0.105817	0.108388	0.215437	0.124593
ENSMUSG00000029119	Man2b2	chr5:36806920-36830653	-	3528	0.878952	7.21683e-49	481.417	0.878952	7.21683e-49	481.417	0	1	0	-	1746	1790	1551	1605	952	909	814	847	10.5052	10.5832	10.4649	10.5183	9.9919	9.96467	9.95736	10.0254	21.7809	23.6858	20.9124	21.9586	11.7299	11.4722	11.3442	12.288
ENSMUSG00000070000	Fcho1	chr8:71708386-71725716	-	4467	0.878698	0.000223907	36.4993	0.878698	0.000223907	36.4993	0	1	0	-	62	40	41	47	24	26	24	16	5.25292	5.12614	5.13747	5.18805	4.99216	5.01102	5.01654	4.9523	0.610851	0.41803	0.436605	0.507855	0.233551	0.25916	0.264164	0.183328
ENSMUSG00000046056	Sbsn	chr7:30734738-30756134	+	3802	0.878404	1.56971e-27	268.042	0.878404	1.56971e-27	268.042	0	1	0	-	732	660	670	691	362	415	370	298	9.22042	9.18349	9.20791	9.25494	8.67778	8.78781	8.77803	8.65292	8.47342	8.10392	8.38269	8.77251	4.13888	4.86011	4.78485	4.0117
ENSMUSG00000074650	Gm10735	chr13:113039300-113042243	-	2943	0.878245	0.00885838	20.5265	0.878245	0.00885838	20.5265	0	1	0	-	14	4	9	9	3	4	1	0	2.47671	2.38869	2.43836	2.44031	2.37711	2.38734	2.35966	2.34928	0.209362	0.0634502	0.14547	0.147608	0.0443116	0.0605174	0.0167066	0
ENSMUSG00000043079	Synpo	chr18:60593972-60660142	-	9533	0.878055	3.27308e-11	104.85	0.878055	3.27308e-11	104.85	0	1	0	-	463	450	463	390	254	225	156	272	8.54408	8.56901	8.60306	8.48597	8.11271	8.04122	7.88062	8.2705	2.13752	2.20367	2.31032	1.97466	1.15822	1.0509	0.804588	1.46037
ENSMUSG00000041540	Sox5	chr6:143828424-144781977	-	14376	0.877867	0.000166726	37.78	0.877867	0.000166726	37.78	0	1	0	-	70	83	54	52	27	49	24	24	5.64849	5.74373	5.57811	5.5733	5.3692	5.52969	5.37121	5.38112	0.214299	0.269528	0.17868	0.174591	0.0816416	0.151764	0.0820827	0.0854472
ENSMUSG00000039686	Zer1	chr2:30097282-30124585	-	9784	0.877426	2.72625e-31	305.644	0.877426	2.72625e-31	305.644	0	1	0	-	966	965	929	881	538	515	410	502	9.64601	9.69777	9.67654	9.65147	9.17532	9.15164	9.05669	9.24455	4.3453	4.60441	4.51668	4.34628	2.3903	2.34369	2.06037	2.6261
ENSMUSG00000087411	Gm16048	chr3:90451582-90457095	+	663	0.877372	0.00295274	25.2978	0.877372	0.00295274	25.2978	0	1	0	-	29	19	21	23	11	10	8	10	4.09404	4.02441	4.04386	4.06524	3.94793	3.94022	3.931	3.95556	1.92506	1.33784	1.5067	1.67445	0.721216	0.671578	0.593273	0.771989
ENSMUSG00000059851	Suv420h2	chr7:4740114-4747514	+	4001	0.875856	3.09407e-35	345.095	0.875856	3.09407e-35	345.095	0	1	0	-	884	836	769	725	449	440	403	398	9.47858	9.48214	9.42192	9.3924	8.94001	8.93459	8.94516	8.96855	9.72396	9.75441	9.14278	8.74636	4.87825	4.8966	4.95239	5.09142
ENSMUSG00000046768	Rhoj	chr12:75308321-75401456	+	6484	0.875511	1.74127e-31	307.591	0.875511	1.74127e-31	307.591	0	1	0	-	1305	1183	1173	1079	596	742	617	538	10.0489	10.0147	10.0196	9.967	9.40396	9.58823	9.52117	9.44749	8.85782	8.51736	8.60549	8.03223	3.99567	5.09532	4.67865	4.24682
ENSMUSG00000031808	Slc27a1	chr8:71568926-71586708	+	2795	0.874468	8.98359e-18	170.465	0.874468	8.98359e-18	170.465	0	1	0	-	392	390	337	312	211	203	166	168	8.27293	8.31519	8.21349	8.17393	7.8448	7.82852	7.76787	7.80224	6.17254	6.51397	5.73546	5.38804	3.28161	3.23388	2.92015	3.07647
ENSMUSG00000023055	Calcoco1	chr15:102706778-102722178	-	3963	0.873954	3.86943e-30	294.124	0.873954	3.86943e-30	294.124	0	1	0	-	1203	1289	1219	1120	620	733	656	537	9.98802	10.1037	10.0659	10.012	9.44779	9.59106	9.58321	9.45926	13.3598	15.1842	14.6319	13.6412	6.8007	8.2355	8.13876	6.93545
ENSMUSG00000052821	Cysltr1	chrX:106574345-106603679	-	5142	0.873894	1.47525e-19	188.311	0.873894	1.47525e-19	188.311	0	1	0	-	410	405	398	375	222	233	216	162	8.38344	8.42044	8.4176	8.3901	7.95643	7.99664	8.01419	7.86048	3.50923	3.67694	3.6819	3.52012	1.87675	2.0176	2.06538	1.61253
ENSMUSG00000084915	C230037L18Rik	chr15:89476235-89484847	+	2017	0.87389	0.00761614	21.1827	0.87389	0.00761614	21.1827	0	1	0	-	14	11	21	17	4	10	4	5	3.41612	3.3958	3.48653	3.45536	3.326	3.38343	3.33206	3.34523	0.305479	0.254595	0.495261	0.406819	0.0862065	0.220752	0.0975062	0.126879
ENSMUSG00000044827	Tlr1	chr5:64924810-64932761	-	2652	0.873615	0.00969738	20.1335	0.873615	0.00969738	20.1335	0	1	0	-	8	13	14	5	6	1	2	1	2.61023	2.66119	2.67179	2.5874	2.59261	2.54434	2.5573	2.54746	0.132763	0.228841	0.251116	0.0910027	0.0983476	0.0167895	0.0370796	0.0192997
ENSMUSG00000046719	Nxph3	chr11:95509844-95514570	-	2099	0.872688	4.54924e-06	53.4206	0.872688	4.54924e-06	53.4206	0	1	0	-	132	99	97	73	47	56	41	55	6.43346	6.31224	6.30883	6.18805	5.992	6.05545	5.98787	6.10343	2.76771	2.20184	2.19826	1.67868	0.973355	1.18792	0.960395	1.34114
ENSMUSG00000056069	Fam105a	chr15:27655070-27681542	-	2830	0.872466	0.000278064	35.5586	0.872466	0.000278064	35.5586	0	1	0	-	39	45	42	44	21	24	19	17	4.98146	5.04109	5.02385	5.04559	4.84708	4.87428	4.85122	4.84062	0.60651	0.742317	0.705965	0.750454	0.322566	0.377603	0.3301	0.307459
ENSMUSG00000040187	Arntl2	chr6:146796054-146833529	+	3032	0.871773	6.05089e-07	62.1818	0.871773	6.05089e-07	62.1818	0	1	0	-	103	87	99	83	55	47	43	43	6.24016	6.18713	6.25622	6.18274	5.98205	5.93414	5.94	5.95461	1.49509	1.33953	1.5532	1.32132	0.788532	0.690206	0.697297	0.725878
ENSMUSG00000035863	Palm	chr10:79793571-79820896	+	2651	0.871635	5.9244e-29	282.274	0.871635	5.9244e-29	282.274	0	1	0	-	2397	2282	2048	1998	1323	1076	998	1190	10.9377	10.948	10.8608	10.8606	10.4221	10.2609	10.2823	10.4657	39.794	40.1855	36.7486	36.3784	21.6938	18.0723	18.5097	22.9753
ENSMUSG00000003363	Pld3	chr7:27531999-27553218	-	2924	0.870965	9.04055e-68	670.438	0.870965	9.04055e-68	670.438	0	1	0	-	2591	2541	2280	2283	1384	1373	1202	1183	11.0683	11.1062	11.0185	11.0424	10.5252	10.5293	10.5026	10.5255	38.9987	40.5686	37.0918	37.6865	20.5752	20.9076	20.2118	20.7077
ENSMUSG00000097391	Mirg	chr12:109729763-109749460	+	7292	0.8708	2.80452e-14	135.521	0.8708	2.80452e-14	135.521	0	1	0	-	310	254	265	226	146	140	135	128	7.86741	7.76662	7.80652	7.71189	7.3858	7.3697	7.40757	7.40254	1.871	1.62611	1.7287	1.49596	0.870347	0.854853	0.91026	0.898438
ENSMUSG00000022176	Rem2	chr14:54476099-54480431	+	2251	0.870627	0.00919544	20.3643	0.870627	0.00919544	20.3643	0	1	0	-	26	17	12	8	7	6	1	7	3.46089	3.39537	3.35134	3.31489	3.2986	3.28989	3.24314	3.31056	0.508344	0.352563	0.253587	0.171543	0.135179	0.118682	0.0218425	0.159165
ENSMUSG00000045730	Adrb2	chr18:62177816-62179959	-	2143	0.870106	0.0018791	27.2605	0.870106	0.0018791	27.2605	0	1	0	-	28	30	26	24	13	12	10	13	4.31466	4.34291	4.314	4.30229	4.19392	4.18661	4.17964	4.21443	0.575036	0.653525	0.577127	0.540564	0.263698	0.249327	0.229433	0.310489
ENSMUSG00000024661	Fth1	chr19:9982702-9985092	+	866	0.86982	2.14337e-69	686.689	0.86982	2.14337e-69	686.689	0	1	0	-	47715	44384	38894	38542	24134	23663	21201	20847	15.2563	15.2446	15.1311	15.1459	14.636	14.6299	14.6218	14.6451	2424.92	2392.61	2136.41	2148.2	1211.43	1216.64	1203.7	1232.11
ENSMUSG00000022658	Tagln3	chr16:45711229-45724608	-	1240	0.869543	0.00481644	23.1727	0.869543	0.00481644	23.1727	0	1	0	-	27	20	15	23	11	13	6	5	3.95462	3.90878	3.86702	3.94089	3.82389	3.84326	3.78641	3.77919	0.9583	0.752959	0.575427	0.89529	0.385618	0.466801	0.237907	0.206383
ENSMUSG00000022217	Emc9	chr14:55581515-55585302	-	2465	0.869221	1.17632e-12	119.295	0.869221	1.17632e-12	119.295	0	1	0	-	320	280	258	234	139	165	116	147	7.91547	7.86102	7.81219	7.76074	7.38365	7.48973	7.34996	7.50813	5.71337	5.30279	4.97878	4.58202	2.45123	2.98042	2.31377	3.05228
ENSMUSG00000007872	Id3	chr4:136143496-136145755	+	1791	0.868775	4.60438e-70	693.368	0.868775	4.60438e-70	693.368	0	1	0	-	14577	13067	11953	11544	7218	7223	6426	6254	13.5378	13.4906	13.4188	13.409	12.9016	12.9136	12.8994	12.9135	358.205	340.599	317.469	311.113	175.189	179.569	176.41	178.726
ENSMUSG00000063018	2010204K13Rik	chrX:7411816-7445143	-	1583	0.868144	4.30889e-11	103.656	0.868144	4.30889e-11	103.656	0	1	0	-	346	345	262	258	204	138	144	142	8.04955	8.09239	7.8995	7.90585	7.69063	7.46572	7.54867	7.56637	9.61955	10.1742	7.87301	7.86677	5.6019	3.88158	4.4726	4.59126
ENSMUSG00000027603	Ggt7	chr2:155490378-155518237	-	3264	0.867652	4.33136e-14	133.634	0.867652	4.33136e-14	133.634	0	1	0	-	303	262	269	240	128	157	147	128	7.86583	7.80384	7.83253	7.76883	7.32937	7.45079	7.47249	7.41834	4.08556	3.74726	3.92033	3.5491	1.70469	2.14171	2.21435	2.00717
ENSMUSG00000003344	Btbd2	chr10:80642616-80657071	-	3586	0.867551	6.79207e-21	201.68	0.867551	6.79207e-21	201.68	0	1	0	-	1248	1237	1026	1032	639	569	515	658	9.98403	10.0301	9.87577	9.90247	9.43084	9.35048	9.35222	9.58128	15.3167	16.1036	13.61	13.8908	7.74598	7.065	7.06115	9.39161
ENSMUSG00000047090	Tmem198b	chr10:128800035-128804370	-	3363	0.867516	3.62035e-19	184.412	0.867516	3.62035e-19	184.412	0	1	0	-	816	707	687	650	423	345	319	411	9.33614	9.2644	9.2518	9.2256	8.81624	8.67705	8.69439	8.91437	10.6788	9.81422	9.71741	9.3292	5.46763	4.56775	4.66382	6.25518
ENSMUSG00000051000	Fam160a1	chr3:85660060-85746266	-	5063	0.866775	1.50184e-13	128.234	0.866775	1.50184e-13	128.234	0	1	0	-	299	263	290	272	161	168	155	105	7.89057	7.84114	7.92167	7.89256	7.4931	7.52617	7.5394	7.3481	2.5991	2.425	2.72465	2.5931	1.38231	1.47745	1.50523	1.06147
ENSMUSG00000050777	Tmem37	chr1:120067376-120074074	-	1311	0.866317	2.43314e-17	166.138	0.866317	2.43314e-17	166.138	0	1	0	-	451	442	377	380	252	209	183	222	8.48521	8.51661	8.4025	8.42748	8.06826	7.95451	7.93628	8.08986	15.1403	15.7392	13.6792	13.9907	8.35572	7.09829	6.8632	8.66712
ENSMUSG00000027546	Atp9a	chr2:168634437-168742409	-	5917	0.864926	0.00010748	39.6867	0.864926	0.00010748	39.6867	0	1	0	-	53	55	51	51	23	24	25	30	5.33321	5.36655	5.34465	5.35287	5.12086	5.13174	5.16254	5.21551	0.394216	0.433935	0.410005	0.416032	0.168971	0.180601	0.207738	0.259504
ENSMUSG00000057719	Sh3rf2	chr18:42053666-42158960	+	5307	0.864697	8.56199e-06	50.6743	0.864697	8.56199e-06	50.6743	0	1	0	-	730	612	605	620	262	413	388	223	9.15572	9.05697	9.05895	9.10006	8.38531	8.71732	8.74679	8.38618	6.05387	5.38351	5.42284	5.63898	2.14604	3.46506	3.59469	2.1507
ENSMUSG00000021094	Dhrs7	chr12:72650355-72664828	-	1301	0.863969	1.07289e-08	79.6945	0.863969	1.07289e-08	79.6945	0	1	0	-	165	166	158	123	96	86	61	73	6.98178	7.02155	6.99953	6.86761	6.69669	6.65179	6.55243	6.64539	5.5817	5.95654	5.77697	4.56337	3.2076	2.94328	2.30532	2.87191
ENSMUSG00000005357	Slc1a6	chr10:78780495-78814825	+	2089	0.863964	1.15166e-20	199.387	0.863964	1.15166e-20	199.387	0	1	0	-	485	544	451	473	258	285	238	250	8.66126	8.80327	8.66209	8.71992	8.20815	8.28493	8.23185	8.29524	10.2179	12.1569	10.2697	10.929	5.36868	6.07458	5.60166	6.12528
ENSMUSG00000024253	Dync2li1	chr17:84626495-84655558	+	1324	0.863579	6.66068e-23	221.765	0.863579	6.66068e-23	221.765	0	1	0	-	707	633	572	532	321	368	299	302	9.11711	9.0741	9.00107	8.9615	8.51261	8.62018	8.54407	8.58237	23.5013	22.3192	20.5508	19.3946	10.5391	12.3757	11.1035	11.6746
ENSMUSG00000043993	2900052L18Rik	chr11:120229801-120231585	-	1588	0.863464	0.00165141	27.8214	0.863464	0.00165141	27.8214	0	1	0	-	37	35	30	31	20	9	11	20	4.64569	4.64615	4.61062	4.62437	4.51692	4.42126	4.45257	4.54529	1.02544	1.02892	0.898651	0.942256	0.547477	0.252349	0.340581	0.644621
ENSMUSG00000034616	Ssh3	chr19:4261667-4269172	-	2740	0.862841	1.61148e-10	97.9277	0.862841	1.61148e-10	97.9277	-1.01966	1	0	chr19:4266521-4266637	178	175	165	161	102	84	77	90	7.12752	7.15387	7.12566	7.12536	6.8265	6.74225	6.75074	6.84396	2.8591	2.98161	2.86453	2.83618	1.61821	1.36502	1.38172	1.68119
ENSMUSG00000026544	Dusp23	chr1:172630768-172632974	-	1417	0.862703	9.75308e-08	70.1086	0.862703	9.75308e-08	70.1086	0	1	0	-	127	154	108	129	65	79	61	61	6.67822	6.82274	6.63086	6.74073	6.37444	6.45976	6.39641	6.4143	3.94451	5.07357	3.62555	4.39418	1.99402	2.48238	2.1166	2.20336
ENSMUSG00000046415	B430212C06Rik	chr18:67321208-67344103	-	3720	0.861772	0.00627263	22.0255	0.861772	0.00627263	22.0255	0	1	0	-	25	18	14	16	5	9	8	7	3.73341	3.68573	3.65206	3.6735	3.56256	3.60114	3.60048	3.5939	0.295772	0.225888	0.179022	0.207604	0.0584269	0.107723	0.105737	0.0963119
ENSMUSG00000044927	H1fx	chr6:87980421-87981482	-	1061	0.859569	3.43423e-18	174.642	0.859569	3.43423e-18	174.642	0	1	0	-	1179	1289	1053	1078	520	687	569	644	9.94155	10.0756	9.90703	9.94944	9.28145	9.50791	9.43879	9.57257	48.9055	56.7154	47.2099	49.0412	21.3046	28.8305	26.3679	31.0667
ENSMUSG00000056445	5730446D14Rik	chr6:52165673-52169564	+	1680	0.857985	2.40973e-09	86.1803	0.857985	2.40973e-09	86.1803	0	1	0	-	201	161	179	146	98	103	68	88	7.21096	7.10823	7.18297	7.07217	6.81313	6.84379	6.7039	6.83912	5.26558	4.47383	5.06832	4.1947	2.53573	2.72985	1.99011	2.68101
ENSMUSG00000037818	3110057O12Rik	chr3:40846969-40938138	+	5433	0.857781	2.10361e-05	46.7703	0.857781	2.10361e-05	46.7703	0	1	0	-	90	106	116	67	48	53	56	33	6.18463	6.29358	6.34836	6.09817	5.94489	5.9824	6.03962	5.88514	0.729058	0.910813	1.01564	0.595241	0.38405	0.434357	0.506788	0.310884
ENSMUSG00000037032	Apbb1	chr7:105558485-105574402	-	2530	0.856603	1.74972e-32	317.57	0.856603	1.74972e-32	317.57	0	1	0	-	1405	1294	1182	1179	783	628	636	648	10.1561	10.136	10.0674	10.0869	9.66557	9.50028	9.59017	9.6399	24.4408	23.8768	22.2238	22.4932	13.4533	11.0522	12.3599	13.1093
ENSMUSG00000039058	Ak5	chr3:152462814-152668140	-	3103	0.856158	2.70792e-31	305.674	0.856158	2.70792e-31	305.674	0	1	0	-	1328	1414	1225	1271	727	821	603	649	10.1254	10.2362	10.1194	10.1744	9.62757	9.7366	9.57041	9.6631	18.8354	21.2731	18.7791	19.7707	10.1845	11.7807	9.55463	10.705
ENSMUSG00000042156	Dzip1	chr14:118875519-118925314	-	4744	0.85582	9.4151e-43	420.262	0.85582	9.4151e-43	420.262	0	1	0	-	1195	1147	1157	1040	630	634	569	592	9.95123	9.96821	9.98839	9.91536	9.42649	9.4417	9.43654	9.50234	11.0862	11.2871	11.6014	10.5815	5.77274	5.95052	5.8972	6.38707
ENSMUSG00000072770	Acrbp	chr6:125049688-125063267	+	3277	0.855206	2.60828e-07	65.8365	0.855206	2.60828e-07	65.8365	0	1	0	-	134	135	107	105	53	77	58	59	6.63718	6.67449	6.55504	6.55775	6.22926	6.37758	6.30529	6.32929	1.79965	1.92318	1.5532	1.54657	0.703049	1.04622	0.870222	0.92151
ENSMUSG00000053181	A830005F24Rik	chr13:48513569-48514859	+	786	0.854233	0.0117094	19.3146	0.854233	0.0117094	19.3146	0	1	0	-	13	10	11	6	3	3	3	3	2.72097	2.69962	2.71026	2.66362	2.62983	2.6303	2.6341	2.63579	0.727914	0.593937	0.665719	0.368457	0.165915	0.169945	0.187662	0.195354
ENSMUSG00000008822	Acyp1	chr12:85272397-85288438	-	1380	0.853951	2.58775e-16	155.871	0.853951	2.58775e-16	155.871	0	1	0	-	318	321	305	289	183	179	136	156	8.01179	8.06292	8.03511	8.01326	7.64876	7.64328	7.54307	7.649	10.1416	10.859	10.5134	10.1083	5.76445	5.77543	4.8455	5.78589
ENSMUSG00000031805	Jak3	chr8:71676295-71690575	+	5352	0.853158	5.86298e-08	72.3188	0.853158	5.86298e-08	72.3188	0	1	0	-	137	144	129	118	58	83	62	70	6.74224	6.80473	6.74925	6.71312	6.35459	6.5038	6.42534	6.49385	1.12659	1.25606	1.14655	1.0642	0.471084	0.690513	0.569579	0.669432
ENSMUSG00000032609	Klhdc8b	chr9:108447657-108452377	-	1897	0.853102	8.16009e-11	100.883	0.853102	8.16009e-11	100.883	-1.03482	1	0	chr9:108452320-108452376	221	203	207	191	129	124	105	75	7.43052	7.41342	7.4355	7.39825	7.11331	7.09909	7.06614	6.92801	5.12725	4.99565	5.19067	4.85986	2.95603	2.91048	2.72145	2.02357
ENSMUSG00000091390	Gm17168	chr17:57041774-57047143	+	345	0.852951	8.93099e-05	40.491	0.852951	8.93099e-05	40.491	0	1	0	-	68	78	57	51	26	30	36	33	5.6385	5.7183	5.59899	5.56795	5.36284	5.39638	5.469	5.45752	8.6746	10.5545	7.85916	7.13524	3.27597	3.87179	5.13052	4.89575
ENSMUSG00000047656	Trpt1	chr19:6996130-6999044	+	1142	0.852614	2.67226e-12	115.731	0.852614	2.67226e-12	115.731	0	1	0	-	281	239	209	236	126	127	138	116	7.72986	7.65743	7.57563	7.67501	7.23671	7.24805	7.35172	7.27938	10.8293	9.77001	8.70564	9.97479	4.79612	4.95163	5.94143	5.19896
ENSMUSG00000032936	Camkv	chr9:107935919-107949691	+	3031	0.852468	1.83452e-13	127.365	0.852468	1.83452e-13	127.365	0	1	0	-	342	356	293	253	170	164	160	161	8.06931	8.14491	8.00901	7.92104	7.60761	7.59417	7.64108	7.67162	4.96592	5.48311	4.59835	4.02895	2.43809	2.40917	2.59545	2.71872
ENSMUSG00000024136	Dnase1l2	chr17:24440080-24443105	-	2328	0.851914	0.0005948	32.2563	0.851914	0.0005948	32.2563	0	1	0	-	62	52	33	43	33	21	19	18	5.25236	5.20933	5.07649	5.15868	5.06152	4.96923	4.97138	4.97042	1.17211	1.04276	0.674297	0.891545	0.616193	0.401649	0.401281	0.395744
ENSMUSG00000054612	Mgmt	chr7:136894610-137128187	+	818	0.851816	3.82252e-10	94.1765	0.851816	3.82252e-10	94.1765	0	1	0	-	291	273	204	226	123	161	107	129	7.77354	7.77013	7.57816	7.66357	7.24268	7.4008	7.23211	7.35708	15.6567	15.5802	11.8631	13.3356	6.53639	8.7636	6.43145	8.07163
ENSMUSG00000029059	Fam213b	chr4:154895503-154899135	-	1027	0.851451	2.61316e-05	45.8283	0.851451	2.61316e-05	45.8283	0	1	0	-	105	144	109	76	69	49	40	60	6.39316	6.59779	6.44959	6.28679	6.21041	6.09064	6.06173	6.21866	4.49965	6.54569	5.04866	3.57191	2.92055	2.1244	1.915	2.99024
ENSMUSG00000074121	Ntf5	chr7:45413694-45417178	+	1962	0.851358	2.96814e-06	55.2752	0.851358	2.96814e-06	55.2752	0	1	0	-	115	107	81	78	53	47	52	42	6.32052	6.31324	6.18485	6.17875	5.9934	5.9583	6.02808	5.97146	2.57964	2.54594	1.96384	1.9189	1.17426	1.06662	1.30311	1.09566
ENSMUSG00000020623	Map2k6	chr11:110399121-110525522	+	3444	0.850841	1.10714e-07	69.558	0.850841	1.10714e-07	69.558	-1.0746	1	0	chr11:110492512-110492632	188	199	196	147	112	83	70	112	7.21819	7.29323	7.2922	7.12676	6.92982	6.79369	6.76706	7.01363	2.40245	2.69745	2.70716	2.06021	1.41365	1.07306	0.99934	1.66448
ENSMUSG00000060380	C030014I23Rik	chr9:44477923-44482180	+	2446	0.850254	0.000164826	37.8297	0.850254	0.000164826	37.8297	0	1	0	-	61	44	61	47	27	33	24	21	5.39755	5.30599	5.42441	5.3393	5.16715	5.21656	5.16826	5.15111	1.09757	0.839768	1.1863	0.927468	0.479837	0.600714	0.482429	0.439428
ENSMUSG00000034522	Zfp395	chr14:65358675-65398930	+	4229	0.848322	7.64671e-41	401.165	0.848322	7.64671e-41	401.165	0	1	0	-	1463	1454	1323	1245	756	786	678	724	10.2403	10.2892	10.2163	10.1838	9.68958	9.73134	9.69407	9.78217	15.2253	16.0506	14.8814	14.2098	7.77088	8.27552	7.88262	8.76245
ENSMUSG00000021559	Dapk1	chr13:60601946-60763185	+	5934	0.84814	3.98471e-05	43.996	0.84814	3.98471e-05	43.996	0	1	0	-	69	63	80	67	38	34	26	42	5.75731	5.74459	5.85074	5.78436	5.56248	5.53675	5.4996	5.64021	0.511754	0.495628	0.641303	0.544986	0.27837	0.255118	0.215429	0.362265
ENSMUSG00000029359	Tesc	chr5:118027742-118061878	+	1591	0.847775	0.0113321	19.4569	0.847775	0.0113321	19.4569	0	1	0	-	14	22	8	11	3	7	4	5	3.20818	3.28567	3.15989	3.19135	3.10699	3.1467	3.12267	3.1359	0.387273	0.645529	0.239189	0.333718	0.0819666	0.195902	0.123614	0.160851
ENSMUSG00000034612	Chst11	chr10:82985497-83195900	+	5527	0.846821	1.13733e-17	169.441	0.846821	1.13733e-17	169.441	0	1	0	-	682	747	700	659	428	375	289	396	9.17283	9.30111	9.25727	9.2267	8.81401	8.72572	8.6139	8.87482	5.43068	6.30949	6.02461	5.75511	3.3662	3.02101	2.57091	3.66716
ENSMUSG00000075592	Nynrin	chr14:55854035-55874735	+	7436	0.846355	1.80145e-37	367.444	0.846355	1.80145e-37	367.444	-1.28059	1.4776e-11	108.304	chr14:55854112-55854424	1109	1121	1068	1029	601	655	582	493	9.85897	9.92179	9.89108	9.87979	9.3611	9.43935	9.42598	9.33036	6.56375	7.03768	6.83207	6.67934	3.51335	3.92204	3.84824	3.39338
ENSMUSG00000048779	P2ry6	chr7:100937637-100964391	-	1938	0.846081	0.010108	19.9533	0.846081	0.010108	19.9533	0	1	0	-	12	5	9	3	2	0	1	2	2.10479	2.04393	2.08365	2.02524	2.01272	1.99291	2.00476	2.0167	0.272513	0.120442	0.220907	0.074718	0.0448603	0	0.0253702	0.0528203
ENSMUSG00000022438	Parvb	chr15:84232042-84315688	+	4416	0.845427	0.000419178	33.776	0.845427	0.000419178	33.776	0	1	0	-	75	67	68	66	48	24	17	45	5.75873	5.73613	5.74773	5.74519	5.59856	5.42469	5.38582	5.62921	0.747467	0.708286	0.732488	0.721394	0.472496	0.241987	0.189277	0.521565
ENSMUSG00000084845	Tmem240	chr4:155734799-155740564	+	5514	0.845283	0.00287156	25.4188	0.845283	0.00287156	25.4188	0	1	0	-	25	37	21	36	14	16	10	14	4.41809	4.52435	4.39897	4.52669	4.32833	4.34782	4.30531	4.35064	0.199541	0.313255	0.181164	0.315133	0.110369	0.1292	0.0891685	0.129953
ENSMUSG00000065503	Mir351	chrX:53053254-53053353	-	99	0.845057	0.0117232	19.3096	0.845057	0.0117232	19.3096	0	1	0	-	21	14	15	8	3	10	2	5	3.32809	3.2767	3.28741	3.22406	3.16995	3.23697	3.16426	3.19851	9.33563	6.6017	7.20737	3.90043	1.31726	4.49754	0.993283	2.58499
ENSMUSG00000075277	6720416L17Rik	chr2:74748421-74762896	-	2454	0.844505	0.000554852	32.5582	0.844505	0.000554852	32.5582	0	1	0	-	54	40	41	46	18	19	30	20	5.15947	5.08241	5.09372	5.13719	4.89864	4.90948	5.02331	4.94594	0.968453	0.760937	0.794749	0.904776	0.318848	0.344738	0.60107	0.417138
ENSMUSG00000053964	Lgals4	chr7:28833974-28841703	+	2189	0.844424	0.00494179	23.0612	0.844424	0.00494179	23.0612	0	1	0	-	39	24	20	17	10	14	8	11	4.26855	4.16675	4.1352	4.11248	4.03747	4.07531	4.02973	4.06496	0.784113	0.511833	0.434615	0.374853	0.198582	0.284769	0.179689	0.2572
ENSMUSG00000018570	2810408A11Rik	chr11:69897351-69900987	-	2368	0.844309	2.10289e-07	66.7718	0.844309	2.10289e-07	66.7718	0	1	0	-	134	124	131	105	77	69	46	65	6.66676	6.65635	6.6947	6.58755	6.40185	6.36198	6.25388	6.39845	2.49048	2.44457	2.63154	2.14025	1.4135	1.29741	0.955112	1.40494
ENSMUSG00000020263	Appl2	chr10:83600032-83648738	-	5949	0.843288	1.40271e-17	168.53	0.843288	1.40271e-17	168.53	0	1	0	-	580	502	521	443	310	329	230	228	8.83857	8.76914	8.81076	8.69941	8.36815	8.41997	8.24317	8.26671	4.29085	3.93934	4.16595	3.59433	2.26519	2.46242	1.90091	1.96162
ENSMUSG00000038203	Hoxa13	chr6:52257693-52260880	-	2472	0.842293	0.0126602	18.9756	0.842293	0.0126602	18.9756	0	1	0	-	13	13	8	9	3	4	4	3	2.85072	2.85712	2.8115	2.82316	2.75955	2.76984	2.77453	2.76571	0.231449	0.245504	0.153944	0.175732	0.0527544	0.072048	0.0795591	0.0621151
ENSMUSG00000042797	Aqp11	chr7:97726378-97738247	-	1322	0.84229	0.0113396	19.454	0.84229	0.0113396	19.454	0	1	0	-	15	11	13	11	5	5	5	3	3.10994	3.08083	3.10077	3.08463	3.02083	3.02154	3.02725	3.00811	0.499366	0.38844	0.46777	0.401623	0.164409	0.168403	0.185959	0.116149
ENSMUSG00000032373	Car12	chr9:66713685-66766845	+	4539	0.841901	4.00823e-17	163.97	0.841901	4.00823e-17	163.97	0	1	0	-	350	324	310	331	191	169	174	169	8.13497	8.12177	8.09917	8.1665	7.72879	7.66258	7.74291	7.75212	3.39365	3.33233	3.24879	3.51986	1.82919	1.65782	1.88481	1.90569
ENSMUSG00000025140	Pycr1	chr11:120635711-120643769	-	3935	0.841077	8.2907e-38	370.814	0.841077	8.2907e-38	370.814	0	1	0	-	1090	1097	1092	1019	572	627	581	540	9.84139	9.90018	9.90849	9.86881	9.32016	9.40208	9.4221	9.3986	12.1911	13.0144	13.2007	12.4993	6.31884	7.09468	7.25955	7.02382
ENSMUSG00000020635	Fkbp1b	chr12:4833174-4841595	-	979	0.840222	1.10792e-05	49.5549	0.840222	1.10792e-05	49.5549	0	1	0	-	92	107	73	79	39	50	41	49	6.12848	6.22893	6.05835	6.10309	5.82177	5.89947	5.87074	5.94272	4.13585	5.10228	3.547	3.89495	1.73168	2.27404	2.05911	2.56176
ENSMUSG00000059791	Nrm	chr17:35861317-35865402	+	1466	0.840212	1.39495e-25	248.554	0.840212	1.39495e-25	248.554	0	1	0	-	798	795	711	696	460	387	361	406	9.35457	9.40297	9.31905	9.32169	8.92018	8.80122	8.82513	8.94541	23.9568	25.3161	23.0705	22.9157	13.6399	11.754	12.1074	14.1748
ENSMUSG00000022040	Ephx2	chr14:66084376-66124500	-	2035	0.839726	0.0123498	19.0834	0.839726	0.0123498	19.0834	0	1	0	-	16	14	8	14	8	2	3	5	3.15316	3.143	3.08832	3.14755	3.08377	3.02685	3.04098	3.06455	0.346031	0.321164	0.187002	0.332064	0.170888	0.0437598	0.0724828	0.125756
ENSMUSG00000034586	Hid1	chr11:115347706-115367756	-	4595	0.839582	1.71354e-08	77.6611	0.839582	1.71354e-08	77.6611	0	1	0	-	228	202	148	166	105	113	100	73	7.36467	7.32297	7.13649	7.22099	6.91787	6.96162	6.95195	6.82564	2.18378	2.05224	1.53213	1.74373	0.993321	1.09497	1.07002	0.813134
ENSMUSG00000051977	Prdm9	chr17:15543078-15564354	-	4308	0.839126	6.85486e-09	81.64	0.839126	6.85486e-09	81.64	-1.05441	0.998586	0.00614548	chr17:15555086-15555403	181	154	174	140	74	98	90	79	7.10097	7.03809	7.12179	7.00407	6.64452	6.77597	6.78474	6.74454	1.84911	1.66882	1.92129	1.56859	0.746693	1.01289	1.02718	0.93859
ENSMUSG00000015542	Nat9	chr11:115182831-115187859	-	2066	0.838946	4.25559e-20	193.71	0.838946	4.25559e-20	193.71	0	1	0	-	603	555	484	464	327	285	252	267	8.89225	8.87296	8.77248	8.75818	8.42884	8.34143	8.32754	8.39765	12.8454	12.5408	11.1439	10.8404	6.88024	6.14221	5.9972	6.61463
ENSMUSG00000064125	BC068157	chr8:4209542-4217459	-	4891	0.838878	0.00050807	32.9408	0.838878	0.00050807	32.9408	0	1	0	-	68	35	52	46	25	31	19	23	5.36342	5.16371	5.28946	5.25588	5.07481	5.12494	5.04717	5.09225	0.611886	0.334067	0.505739	0.45396	0.222192	0.282211	0.191	0.240688
ENSMUSG00000035448	Ccr3	chr9:124021970-124031689	+	3273	0.838837	0.0113977	19.4318	0.838837	0.0113977	19.4318	0	1	0	-	11	7	10	4	0	0	4	2	2.26656	2.23404	2.26379	2.20613	2.1632	2.16333	2.20742	2.18731	0.147913	0.0998425	0.145336	0.0589891	0	0	0.0600886	0.0312758
ENSMUSG00000055633	Zfp580	chr7:5051531-5053722	+	1101	0.838647	5.16751e-16	152.867	0.838647	5.16751e-16	152.867	0	1	0	-	324	315	288	289	172	172	143	164	8.01921	8.04245	7.9866	8.00687	7.60474	7.61265	7.56505	7.67303	12.9514	13.3563	12.443	12.6698	6.7909	6.95587	6.38597	7.62397
ENSMUSG00000051359	Ncald	chr15:37366174-37792570	-	6987	0.838579	0.00197724	27.0394	0.838579	0.00197724	27.0394	0	1	0	-	28	29	38	31	19	14	11	15	4.52865	4.54943	4.6212	4.57398	4.45951	4.41861	4.40423	4.44879	0.176371	0.193763	0.25871	0.214155	0.118209	0.089217	0.077407	0.109882
ENSMUSG00000015944	Gatsl2	chr5:134099710-134144343	+	7560	0.838435	5.56934e-28	272.542	0.838435	5.56934e-28	272.542	0	1	0	-	789	729	694	649	395	385	372	388	9.31658	9.30013	9.27003	9.234	8.77605	8.76684	8.81666	8.88081	4.59319	4.50162	4.36675	4.14363	2.27123	2.26751	2.41935	2.62685
ENSMUSG00000043088	Il17re	chr6:113458483-113470751	+	2992	0.838311	0.0124179	19.0595	0.838311	0.0124179	19.0595	0	1	0	-	12	9	17	11	4	3	5	5	3.04903	3.02714	3.10192	3.04973	2.97627	2.96707	2.99227	2.9948	0.176514	0.140425	0.270276	0.177455	0.0581145	0.0446447	0.082165	0.0855329
ENSMUSG00000025197	Cyp2c44	chr19:44005021-44029247	-	1964	0.838046	0.00903176	20.4423	0.838046	0.00903176	20.4423	0	1	0	-	16	4	6	3	2	2	0	0	2.06357	1.95636	1.97723	1.94743	1.93472	1.93504	1.91545	1.91586	0.35854	0.0950784	0.145322	0.0737289	0.0442664	0.0453418	0	0
ENSMUSG00000021876	Rnase4	chr14:51091076-51106151	+	1996	0.837382	9.14579e-33	320.388	0.837382	9.14579e-33	320.388	0	1	0	-	1345	1323	1245	1140	649	763	696	621	10.12	10.1593	10.1171	10.0603	9.51953	9.6587	9.6663	9.60949	29.6566	30.943	29.6708	27.5678	14.1342	17.0206	17.1446	15.9241
ENSMUSG00000089989	Flt3l	chr7:45131187-45136432	-	3712	0.837205	0.000131339	38.8161	0.837205	0.000131339	38.8161	0	1	0	-	69	73	67	67	29	53	36	21	5.74002	5.78744	5.75728	5.76702	5.47783	5.65199	5.56319	5.44846	0.818089	0.918075	0.858593	0.871213	0.339607	0.635738	0.47684	0.289558
ENSMUSG00000045333	Zfp423	chr8:87661809-87959595	-	5608	0.835522	0.000628218	32.0189	0.835522	0.000628218	32.0189	0	1	0	-	55	47	47	39	20	18	33	20	5.21184	5.17827	5.18265	5.1321	4.96153	4.94694	5.09385	4.99221	0.431633	0.391249	0.398667	0.335671	0.155027	0.142914	0.289324	0.182535
ENSMUSG00000051439	Cd14	chr18:36725073-36726736	-	1572	0.835415	1.99665e-10	96.997	0.835415	1.99665e-10	96.997	0	1	0	-	206	171	170	174	94	112	90	87	7.27956	7.19836	7.20327	7.23309	6.84741	6.93973	6.88281	6.88803	5.76732	5.07816	5.14419	5.34262	2.59933	3.17231	2.81493	2.83264
ENSMUSG00000038349	Plcl1	chr1:55406387-55751802	+	3630	0.834782	1.49511e-05	48.2533	0.834782	1.49511e-05	48.2533	0	1	0	-	101	92	74	73	35	56	42	41	6.14077	6.12363	6.03056	6.03508	5.75516	5.90288	5.84177	5.84845	1.22454	1.18316	0.969718	0.970675	0.419129	0.686897	0.56888	0.578099
ENSMUSG00000071324	Armc2	chr10:41914989-42018442	-	7188	0.834294	0.00268621	25.7086	0.834294	0.00268621	25.7086	0	1	0	-	30	31	24	30	15	10	12	16	4.42631	4.44755	4.39383	4.44843	4.30675	4.26333	4.29456	4.33948	0.183685	0.201334	0.158827	0.201452	0.0907129	0.0619444	0.0820827	0.11393
ENSMUSG00000027597	Ahcy	chr2:155059309-155074497	-	2805	0.833619	4.19143e-07	63.7764	0.833619	4.19143e-07	63.7764	-1.14291	1	0	chr2:155068560-155069024	195	150	128	138	93	69	65	91	7.08741	6.96096	6.87724	6.93406	6.68256	6.55899	6.5783	6.74897	3.05958	2.49644	2.17069	2.37467	1.44124	1.09528	1.13935	1.66048
ENSMUSG00000006369	Fbln1	chr15:85205948-85286535	+	4368	0.832188	1.98528e-29	287.022	0.832188	1.98528e-29	287.022	0	1	0	-	3006	3079	2654	2639	1676	1555	1312	1616	11.2947	11.3736	11.2479	11.2654	10.7859	10.7332	10.6757	10.8898	30.2877	32.9071	28.9027	29.1618	16.6793	15.851	14.7683	18.9358
ENSMUSG00000040473	A330021E22Rik	chr5:5579277-5664239	-	5457	0.831915	1.54855e-13	128.101	0.831915	1.54855e-13	128.101	0	1	0	-	321	311	295	244	175	173	156	125	7.98208	8.00265	7.97378	7.85511	7.5838	7.58479	7.58444	7.4827	2.58887	2.66054	2.57151	2.15821	1.39402	1.41157	1.40556	1.17241
ENSMUSG00000039110	Mycbpap	chr11:94501346-94521742	-	3871	0.830537	0.00265634	25.7572	0.830537	0.00265634	25.7572	0	1	0	-	31	26	28	27	13	13	11	15	4.40363	4.3773	4.39648	4.39356	4.25896	4.26063	4.25459	4.29955	0.35245	0.313555	0.344077	0.336665	0.145984	0.149531	0.139717	0.198332
ENSMUSG00000021998	Lcp1	chr14:75131100-75230842	+	9504	0.829073	7.28959e-12	111.373	0.829073	7.28959e-12	111.373	0	1	0	-	216	218	197	194	116	115	102	109	7.42923	7.47505	7.41673	7.42251	7.07168	7.07407	7.06609	7.12343	1.00025	1.07081	0.986008	0.985265	0.530564	0.538768	0.527682	0.587009
ENSMUSG00000028133	Rwdd3	chr3:121155399-121171695	-	5063	0.828523	0.000131204	38.8205	0.828523	0.000131204	38.8205	0	1	0	-	55	72	62	67	41	34	21	34	5.58107	5.70745	5.65216	5.69279	5.49245	5.44524	5.36428	5.48537	0.478095	0.663877	0.582511	0.638741	0.352016	0.299007	0.203934	0.343713
ENSMUSG00000050761	Gp1bb	chr16:18620318-18622403	-	1881	0.828435	4.81821e-09	83.1711	0.828435	4.81821e-09	83.1711	0	1	0	-	223	210	185	148	117	92	100	97	7.38061	7.37986	7.30558	7.18238	7.00449	6.89293	6.98389	6.99093	5.21766	5.21187	4.67847	3.79779	2.70385	2.17776	2.6139	2.63941
ENSMUSG00000026839	Upp2	chr2:58567297-58792971	+	7053	0.828345	0.00803625	20.9495	0.828345	0.00803625	20.9495	0	1	0	-	24	22	14	16	8	10	9	5	3.79922	3.79347	3.72577	3.74724	3.66443	3.68404	3.68429	3.64665	0.14976	0.145617	0.0944223	0.109497	0.0493063	0.0631301	0.0627404	0.0362845
ENSMUSG00000020895	Tmem107	chr11:69070805-69073293	+	1369	0.827316	6.94995e-19	181.58	0.827316	6.94995e-19	181.58	0	1	0	-	511	434	422	394	239	273	229	212	8.63951	8.55636	8.54514	8.51038	8.09012	8.18853	8.1386	8.11661	16.4277	14.7996	14.6632	13.8915	7.58893	8.87911	8.22452	7.92605
ENSMUSG00000002266	Zim1	chr7:6675442-6696450	-	3641	0.827171	0.0135661	18.6754	0.827171	0.0135661	18.6754	0	1	0	-	6	5	10	11	0	1	4	2	2.27363	2.26713	2.31657	2.32826	2.21574	2.22602	2.26009	2.23997	0.0725254	0.064108	0.130647	0.145824	0	0.012229	0.0540154	0.0281147
ENSMUSG00000045104	Gm5514	chr19:21938078-21938384	+	306	0.827072	0.0143826	18.4216	0.827072	0.0143826	18.4216	0	1	0	-	7	11	19	15	5	8	3	2	3.07221	3.11494	3.18949	3.15674	3.05409	3.08375	3.03935	3.03008	1.00678	1.67816	2.95361	2.36607	0.710288	1.16407	0.482035	0.334529
ENSMUSG00000097649	Gm10561	chr1:55226250-55235622	+	1943	0.826636	6.58862e-08	71.8121	0.826636	6.58862e-08	71.8121	0	1	0	-	129	135	132	119	65	67	67	73	6.69637	6.75482	6.74977	6.70525	6.3846	6.40168	6.44418	6.49969	2.92197	3.24358	3.23163	2.95619	1.45421	1.53537	1.69543	1.92298
ENSMUSG00000073888	Ccl27a	chr4:41769466-41774247	-	2377	0.82615	6.38326e-06	51.9496	0.82615	6.38326e-06	51.9496	0	1	0	-	91	90	75	73	47	43	41	40	6.06617	6.08838	6.0117	6.01039	5.8151	5.79193	5.80983	5.81622	1.68489	1.76757	1.5009	1.48235	0.859517	0.80547	0.848073	0.861302
ENSMUSG00000072812	Ahnak2	chr12:112772193-112802657	-	14163	0.826008	2.25126e-30	296.476	0.826008	2.25126e-30	296.476	-1.21922	1	0	chr12:112786160-112786304	802	807	728	735	425	429	409	409	9.37771	9.43469	9.35812	9.38716	8.88099	8.89767	8.93827	8.97125	2.49218	2.66	2.4451	2.5049	1.30443	1.34869	1.41986	1.47806
ENSMUSG00000024975	Pdcd4	chr19:53892230-53929861	+	2556	0.825742	1.1725e-21	209.309	0.825742	1.1725e-21	209.309	0	1	0	-	1050	993	1003	869	643	534	429	523	9.75369	9.75739	9.77852	9.67431	9.35305	9.21715	9.12875	9.31404	18.0796	18.1364	18.6664	16.4103	10.9354	9.30231	8.2523	10.4729
ENSMUSG00000032850	Rnft2	chr5:118190735-118245116	-	5593	0.824518	1.69108e-08	77.7183	0.824518	1.69108e-08	77.7183	0	1	0	-	156	140	129	147	71	83	81	69	6.90271	6.87387	6.83503	6.92475	6.51851	6.59031	6.62603	6.57504	1.22755	1.16855	1.09715	1.26862	0.551823	0.66076	0.712063	0.631435
ENSMUSG00000002076	Hsf2bp	chr17:31944768-32034508	-	2973	0.823999	0.0154603	18.1078	0.823999	0.0154603	18.1078	0	1	0	-	9	8	14	8	4	3	4	1	2.66074	2.65598	2.71325	2.65884	2.61486	2.60561	2.61996	2.58887	0.133232	0.12562	0.224003	0.129883	0.0584859	0.04493	0.0661521	0.0172159
ENSMUSG00000030849	Fgfr2	chr7:130162450-133123350	-	7240	0.823989	1.84744e-44	437.334	0.823989	1.84744e-44	437.334	-1.29503	3.53693e-31	304.514	chr7:133123136-133123352	2280	2055	1947	1930	1186	1240	1131	939	10.8694	10.829	10.7922	10.8066	10.306	10.3543	10.3619	10.2433	13.8598	13.2506	12.7923	12.867	7.12085	7.62594	7.68073	6.63822
ENSMUSG00000086328	2700033N17Rik	chr2:116066217-116067444	-	721	0.823464	0.00432663	23.6385	0.823464	0.00432663	23.6385	0	1	0	-	39	31	38	27	10	30	12	10	4.67272	4.62793	4.68511	4.60435	4.44143	4.61275	4.4748	4.46047	2.38061	2.0072	2.50708	1.80753	0.602908	1.85266	0.818322	0.709887
ENSMUSG00000002980	Bcam	chr7:19756130-19771016	-	3199	0.823021	5.32579e-24	232.736	0.823021	5.32579e-24	232.736	0	1	0	-	1345	1213	1000	1074	612	719	612	576	10.0716	10.0326	9.87406	9.95829	9.41968	9.55788	9.50987	9.49623	18.5041	17.7015	14.8698	16.205	8.31617	10.0075	9.40623	9.2158
ENSMUSG00000087365	C430049B03Rik	chrX:53055045-53057190	-	1610	0.822448	6.94997e-13	121.58	0.822448	6.94997e-13	121.58	0	1	0	-	375	289	380	326	220	204	158	160	8.2174	8.06808	8.28421	8.18519	7.8497	7.80947	7.71579	7.74999	10.251	8.37983	11.2274	9.77349	5.93995	5.64176	4.82514	5.0865
ENSMUSG00000034708	Grn	chr11:102430314-102437048	+	3474	0.822063	6.4269e-64	631.92	0.822063	6.4269e-64	631.92	0	1	0	-	6797	6617	5893	5731	3577	3592	3274	3272	12.4665	12.4983	12.4016	12.3984	11.8945	11.9094	11.9165	11.9538	86.1087	88.919	80.6914	79.6266	44.7585	46.038	46.3369	48.2068
ENSMUSG00000075585	6330403L08Rik	chr5:138995055-139000576	+	5521	0.822003	6.13605e-13	122.121	0.822003	6.13605e-13	122.121	0	1	0	-	328	282	268	263	139	177	162	137	7.98122	7.91391	7.8872	7.89108	7.43355	7.58134	7.58978	7.51668	2.61466	2.38448	2.30907	2.2993	1.09442	1.42747	1.4427	1.27007
ENSMUSG00000045114	Prrt2	chr7:127016770-127021211	-	3272	0.821903	4.60204e-14	133.37	0.821903	4.60204e-14	133.37	0	1	0	-	344	331	283	294	182	205	154	138	8.08688	8.10263	7.99709	8.04264	7.66273	7.74546	7.63234	7.59444	4.62706	4.72256	4.11428	4.33702	2.41793	2.78966	2.31412	2.15869
ENSMUSG00000002908	Kcnn1	chr8:70842048-70857008	-	4054	0.821238	3.18556e-06	54.9681	0.821238	3.18556e-06	54.9681	0	1	0	-	109	95	90	89	52	42	51	55	6.3136	6.27425	6.25473	6.26085	6.00812	5.94522	6.04245	6.08616	1.18332	1.09396	1.05604	1.05965	0.557578	0.461292	0.618536	0.69439
ENSMUSG00000035936	Aldh5a1	chr13:24907578-24937661	-	5647	0.821183	3.12003e-11	105.058	0.821183	3.12003e-11	105.058	0	1	0	-	231	235	240	234	145	113	113	135	7.58228	7.63458	7.65871	7.65788	7.30255	7.17583	7.23017	7.35297	1.80034	1.94273	2.02169	2.00012	1.11619	0.890986	0.983873	1.2236
ENSMUSG00000034854	Mfsd12	chr10:81357490-81366225	+	3971	0.820921	1.82287e-17	167.392	0.820921	1.82287e-17	167.392	0	1	0	-	443	473	408	372	253	250	228	192	8.50108	8.60105	8.49423	8.44136	8.10252	8.10329	8.11016	8.0267	4.9098	5.56064	4.88743	4.52169	2.76953	2.80318	2.82302	2.47472
ENSMUSG00000000247	Lhx2	chr2:38339280-38369733	+	4393	0.820673	5.87811e-09	82.3076	0.820673	5.87811e-09	82.3076	0	1	0	-	185	157	177	186	83	109	103	82	7.19425	7.12965	7.21237	7.25969	6.77446	6.9093	6.93286	6.84338	1.8534	1.66841	1.9166	2.04366	0.821302	1.10478	1.1528	0.955382
ENSMUSG00000034258	Mfsd7c	chr12:85746538-85813585	+	3435	0.818524	0.000130635	38.8394	0.818524	0.000130635	38.8394	0	1	0	-	75	55	73	84	30	51	33	33	5.82647	5.72861	5.84551	5.91895	5.53788	5.69114	5.59214	5.60447	0.960935	0.747479	1.01092	1.18035	0.379647	0.661079	0.472352	0.491713
ENSMUSG00000079339	Gm14446	chr19:34592887-34601968	-	2275	0.817695	0.00740663	21.3038	0.817695	0.00740663	21.3038	0	1	0	-	22	15	24	23	11	12	6	8	3.93679	3.88656	3.96625	3.96239	3.84526	3.85568	3.8078	3.83208	0.425599	0.307803	0.501823	0.487982	0.210183	0.234861	0.129673	0.179984
ENSMUSG00000029499	Pxmp2	chr5:110274281-110286186	-	1200	0.817658	1.48708e-08	78.2767	0.817658	1.48708e-08	78.2767	0	1	0	-	176	168	202	162	110	96	105	69	7.16557	7.17353	7.30075	7.17447	6.90971	6.84941	6.94523	6.76966	6.45492	6.53569	8.00738	6.51616	3.98472	3.56205	4.30216	2.94301
ENSMUSG00000085455	1810059H22Rik	chr5:148953747-148970122	-	2897	0.817442	0.00831963	20.799	0.817442	0.00831963	20.799	0	1	0	-	17	30	15	24	8	8	12	9	3.92036	4.03811	3.91315	3.99667	3.84158	3.84273	3.8919	3.86655	0.258262	0.483433	0.246299	0.399872	0.12004	0.122957	0.203663	0.159008
ENSMUSG00000045009	Prrt3	chr6:113494094-113501818	-	3304	0.817168	0.0102195	19.9057	0.817168	0.0102195	19.9057	0	1	0	-	19	18	20	17	12	9	2	8	3.7233	3.72381	3.74344	3.7206	3.66467	3.63844	3.5749	3.64175	0.253089	0.254329	0.287946	0.248351	0.15788	0.121287	0.0297624	0.123929
ENSMUSG00000000530	Acvrl1	chr15:101128521-101145336	+	4265	0.816329	0.000760714	31.1878	0.816329	0.000760714	31.1878	0	1	0	-	50	46	43	42	18	31	26	15	5.14434	5.13606	5.11906	5.11911	4.90977	5.01754	5.00088	4.90988	0.515953	0.503503	0.47959	0.475322	0.183459	0.323633	0.299732	0.18001
ENSMUSG00000087651	1500009L16Rik	chr10:83722864-83762761	+	1193	0.816025	0.00118165	29.2751	0.816025	0.00118165	29.2751	0	1	0	-	56	69	60	51	35	16	21	43	5.47848	5.5809	5.53047	5.47947	5.33959	5.18955	5.25368	5.44597	2.06589	2.70005	2.39239	2.06342	1.2753	0.597159	0.86548	1.84481
ENSMUSG00000078444	Gm10941	chr10:77257775-77259223	-	708	0.815675	0.0166061	17.7973	0.815675	0.0166061	17.7973	0	1	0	-	14	11	5	8	2	5	3	1	2.63641	2.6157	2.55901	2.59029	2.52692	2.55666	2.54088	2.52036	0.870271	0.725308	0.335937	0.545399	0.122796	0.314447	0.208337	0.0722922
ENSMUSG00000030083	Abtb1	chr6:88835914-88841935	-	1879	0.815336	4.40562e-11	103.56	0.815336	4.40562e-11	103.56	0	1	0	-	257	236	200	218	134	142	99	118	7.62919	7.6111	7.50878	7.58263	7.23172	7.27132	7.13549	7.25013	6.01958	5.86339	5.06318	5.59999	3.10002	3.3649	2.59052	3.21425
ENSMUSG00000028599	Tnfrsf1b	chr4:145213462-145246870	-	3818	0.815301	2.24783e-65	646.482	0.815301	2.24783e-65	646.482	0	1	0	-	3346	3178	2883	2916	1849	1779	1579	1587	11.441	11.4491	11.3713	11.4046	10.9214	10.8994	10.8839	10.9251	38.57	38.8581	35.9194	36.8646	21.0517	20.7468	20.3341	21.2748
ENSMUSG00000020419	Hormad2	chr11:4345813-4441105	-	2734	0.815273	0.016017	17.9542	0.815273	0.016017	17.9542	0	1	0	-	6	9	13	10	2	7	1	0	2.5403	2.57265	2.61123	2.58543	2.50254	2.55142	2.49501	2.48466	0.0965856	0.153676	0.226186	0.176547	0.0317993	0.114001	0.0179837	0
ENSMUSG00000044854	1700056E22Rik	chr1:184033031-184033998	-	967	0.815018	0.00817445	20.8754	0.815018	0.00817445	20.8754	0	1	0	-	28	24	17	14	12	8	8	8	3.95632	3.93593	3.87797	3.85398	3.82542	3.7898	3.79893	3.80297	1.27436	1.15864	0.836263	0.69881	0.539437	0.368361	0.406763	0.423436
ENSMUSG00000052783	Grk4	chr5:34660378-34755305	+	4830	0.814964	0.00175851	27.5485	0.814964	0.00175851	27.5485	0	1	0	-	40	31	31	34	21	15	14	16	4.72464	4.67365	4.67692	4.70615	4.58458	4.536	4.54178	4.56736	0.364479	0.299625	0.305306	0.339774	0.188998	0.138278	0.142515	0.16955
ENSMUSG00000044390	Tigd3	chr19:5891138-5894107	-	2114	0.81488	1.64505e-06	57.8382	0.81488	1.64505e-06	57.8382	0	1	0	-	124	110	105	94	57	71	43	58	6.50399	6.47146	6.45438	6.41079	6.1635	6.25267	6.11021	6.23089	2.58152	2.42913	2.36268	2.14625	1.17208	1.49542	1.0001	1.40426
ENSMUSG00000027709	Mccc1	chr3:35959311-36000678	-	10442	0.81412	1.83706e-33	327.359	0.81412	1.83706e-33	327.359	0	1	0	-	1159	1033	1038	964	628	627	497	555	9.88535	9.83657	9.85312	9.80954	9.38191	9.39092	9.28913	9.40904	4.88494	4.61828	4.72862	4.45606	2.61434	2.67359	2.34019	2.72041
ENSMUSG00000087626	Gm15050	chr6:52172880-52174059	+	552	0.814009	8.69897e-07	60.6053	0.814009	8.69897e-07	60.6053	0	1	0	-	141	137	130	128	71	62	59	91	6.78154	6.7988	6.77668	6.78149	6.45491	6.40738	6.42949	6.63866	11.2419	11.5863	11.2028	11.1925	5.5912	5.00107	5.25522	8.43776
ENSMUSG00000038375	Trp53inp2	chr2:155381058-155389850	+	5257	0.813782	7.82154e-35	341.067	0.813782	7.82154e-35	341.067	0	1	0	-	1028	907	974	886	546	577	481	485	9.72183	9.66481	9.7394	9.67782	9.21011	9.26331	9.20086	9.24087	8.60626	8.05439	8.81336	8.13492	4.51482	4.88706	4.49868	4.72203
ENSMUSG00000027716	Trpc3	chr3:36620481-36690167	-	5419	0.813353	0.00980969	20.0834	0.813353	0.00980969	20.0834	0	1	0	-	17	21	22	16	4	9	8	11	3.75553	3.79894	3.80987	3.76064	3.63858	3.68742	3.68692	3.72179	0.138067	0.18091	0.193119	0.142514	0.0320868	0.0739492	0.0725854	0.103896
ENSMUSG00000048218	Amigo2	chr15:97244073-97247287	-	2871	0.813097	2.16614e-10	96.6431	0.813097	2.16614e-10	96.6431	0	1	0	-	208	239	217	203	121	142	96	111	7.44746	7.58117	7.5243	7.49573	7.13742	7.2319	7.08024	7.17722	3.18852	3.88622	3.5954	3.41288	1.83205	2.20224	1.64406	1.97886
ENSMUSG00000019088	Dnase1l1	chrX:74273216-74282337	-	2121	0.812657	2.13614e-09	86.7037	0.812657	2.13614e-09	86.7037	0	1	0	-	181	200	182	151	95	108	97	85	7.19392	7.29599	7.24354	7.14261	6.84947	6.91836	6.91638	6.87408	3.75576	4.40203	4.0818	3.43632	1.94701	2.26722	2.24859	2.05118
ENSMUSG00000025579	Gaa	chr11:119267886-119285454	+	4783	0.812348	5.97637e-47	462.236	0.812348	5.97637e-47	462.236	-1.26658	1.64555e-38	377.837	chr11:119279384-119279488	7440	7434	6357	6592	4109	4068	3411	3755	12.606	12.6627	12.5274	12.5849	12.0765	12.079	12.0134	12.1354	68.4592	72.558	63.2226	66.5234	37.3441	37.8696	35.0639	40.1822
ENSMUSG00000035934	Pknox2	chr9:36890981-37147314	-	6601	0.812058	9.14003e-13	120.391	0.812058	9.14003e-13	120.391	0	1	0	-	307	340	315	269	190	171	138	171	7.99296	8.11316	8.06601	7.9682	7.67914	7.62286	7.55865	7.71275	2.04686	2.40454	2.26998	1.96698	1.25121	1.15344	1.02789	1.3259
ENSMUSG00000030030	1700003E16Rik	chr6:83156403-83162975	+	2050	0.811888	0.0079227	21.0113	0.811888	0.0079227	21.0113	0	1	0	-	20	27	19	16	10	8	8	10	3.89155	3.9597	3.89486	3.87169	3.80642	3.789	3.79813	3.82286	0.429374	0.614856	0.44088	0.376725	0.212047	0.173759	0.191873	0.249673
ENSMUSG00000005338	Cadm3	chr1:173334253-173367695	-	6252	0.810306	0.000524641	32.8014	0.810306	0.000524641	32.8014	0	1	0	-	60	61	75	65	20	52	31	29	5.6289	5.65732	5.74751	5.69715	5.34771	5.58798	5.46549	5.46043	0.422369	0.455485	0.570641	0.501825	0.139058	0.370335	0.243793	0.237413
ENSMUSG00000029060	Mib2	chr4:155654676-155669198	-	4724	0.810113	1.00017e-16	159.999	0.810113	1.00017e-16	159.999	0	1	0	-	795	872	624	728	402	472	384	394	9.35868	9.49091	9.21702	9.36742	8.82738	8.95757	8.87856	8.93048	7.40656	8.61727	6.28341	7.4384	3.69915	4.44879	3.99668	4.26885
ENSMUSG00000079488	Cd47	chr16:49913192-49915008	+	1815	0.809956	4.15026e-31	303.819	0.809956	4.15026e-31	303.819	0	1	0	-	1090	971	1050	890	599	602	492	514	9.80431	9.7554	9.8367	9.71292	9.3158	9.32996	9.252	9.31965	26.4307	24.975	27.519	23.6685	14.3462	14.7683	13.3281	14.4948
ENSMUSG00000036356	Csgalnact1	chr8:68356780-68735146	-	4774	0.809916	9.27794e-19	180.325	0.809916	9.27794e-19	180.325	0	1	0	-	530	437	407	454	267	265	236	234	8.69902	8.59193	8.54698	8.65283	8.1958	8.19959	8.19052	8.2144	4.88599	4.27329	4.05539	4.5902	2.43117	2.47157	2.43057	2.50875
ENSMUSG00000030560	Ctsc	chr7:88278084-88310888	+	5801	0.809287	1.77935e-15	147.497	0.809287	1.77935e-15	147.497	0	1	0	-	576	587	543	455	296	367	284	238	8.87597	8.94122	8.88804	8.76454	8.38163	8.54511	8.43335	8.34211	4.36998	4.72388	4.45264	3.78588	2.21807	2.81691	2.4071	2.0999
ENSMUSG00000049811	Fam161a	chr11:23007530-23030788	+	4396	0.809126	0.00655443	21.8347	0.809126	0.00655443	21.8347	0	1	0	-	17	35	30	21	14	14	11	8	4.16929	4.32607	4.29043	4.22012	4.14538	4.1471	4.13174	4.10605	0.170197	0.371684	0.324627	0.230579	0.138438	0.141801	0.123031	0.0931444
ENSMUSG00000022546	Gpt	chr15:76696763-76699674	+	1749	0.807987	3.42048e-12	114.659	0.807987	3.42048e-12	114.659	0	1	0	-	370	356	275	289	169	174	180	177	8.16614	8.1821	8.0008	8.05435	7.64319	7.66847	7.75259	7.76961	9.31047	9.50218	7.47934	7.97564	4.20033	4.42965	5.06012	5.17974
ENSMUSG00000074652	Myh7b	chr2:155611211-155634307	+	6634	0.807902	1.59576e-05	47.9703	0.807902	1.59576e-05	47.9703	0	1	0	-	119	105	96	70	61	51	55	38	6.37146	6.33652	6.29825	6.16492	6.07676	6.01815	6.08177	5.97437	0.789462	0.738885	0.688361	0.509308	0.399706	0.342298	0.407629	0.293179
ENSMUSG00000038725	Pkhd1l1	chr15:44457552-44597143	+	12754	0.807396	1.93242e-20	197.139	0.807396	1.93242e-20	197.139	-1.52629	2.16113e-84	836.653	chr15:44526688-44526880	2685	2623	2519	2670	1286	1700	1577	1214	11.1513	11.1855	11.1609	11.2379	10.5206	10.7669	10.7893	10.6033	9.26526	9.60097	9.39512	10.1047	4.38309	5.93489	6.07944	4.87188
ENSMUSG00000051048	P4ha3	chr7:100285519-100319699	+	3043	0.807157	0.000106103	39.7427	0.807157	0.000106103	39.7427	0	1	0	-	441	464	489	456	323	195	165	277	8.53819	8.62618	8.67996	8.6429	8.31454	7.98541	7.94841	8.31724	6.37817	7.11835	7.64412	7.23304	4.6141	2.85327	2.666	4.6591
ENSMUSG00000034917	Tjp3	chr10:81273206-81291267	-	3024	0.806901	0.0129756	18.8687	0.806901	0.0129756	18.8687	0	1	0	-	18	23	19	13	7	14	7	2	3.68134	3.73312	3.70113	3.6499	3.58479	3.65045	3.59386	3.54296	0.261969	0.355066	0.298877	0.207501	0.100624	0.206137	0.113814	0.0338511
ENSMUSG00000038286	Bphl	chr13:34037640-34074074	+	1209	0.806855	3.45745e-14	134.612	0.806855	3.45745e-14	134.612	0	1	0	-	386	408	323	317	203	212	174	195	8.27763	8.36715	8.19843	8.2026	7.83781	7.87378	7.81438	7.91425	14.0514	15.7542	12.7086	12.6558	7.29887	7.80764	7.07622	8.2553
ENSMUSG00000067206	Lrrc66	chr5:73606642-73632505	-	3215	0.806706	0.0176275	17.5381	0.806706	0.0176275	17.5381	0	1	0	-	11	9	12	12	5	7	1	2	2.87524	2.86215	2.89157	2.8941	2.82104	2.84083	2.78474	2.79694	0.150581	0.130685	0.17755	0.18016	0.0676044	0.0969454	0.0152932	0.03184
ENSMUSG00000084960	B430010I23Rik	chr8:41017467-41024216	+	3270	0.806005	0.00140817	28.5135	0.806005	0.00140817	28.5135	0	1	0	-	41	51	37	32	26	22	18	14	4.94126	5.02793	4.93254	4.90028	4.83333	4.8035	4.78756	4.75707	0.551818	0.728091	0.538238	0.472346	0.34563	0.299561	0.270647	0.219132
ENSMUSG00000097684	Gm26645	chr13:15459979-15461295	-	1316	0.804175	0.00609642	22.1493	0.804175	0.00609642	22.1493	0	1	0	-	25	24	24	25	7	14	15	9	4.18332	4.18668	4.18935	4.20256	4.02979	4.09549	4.11858	4.06478	0.836072	0.85137	0.867513	0.916942	0.231221	0.473677	0.56042	0.350035
ENSMUSG00000018906	P4ha2	chr11:54100094-54131665	+	6239	0.802981	1.1721e-36	359.31	0.802981	1.1721e-36	359.31	0	1	0	-	3608	3473	3543	3236	2282	1963	1641	1820	11.5732	11.5939	11.6258	11.5638	11.172	11.0528	10.9865	11.1118	25.4514	25.9868	27.0132	25.0352	15.8996	14.0093	12.9322	14.9307
ENSMUSG00000037370	Enpp1	chr10:24637913-24712159	-	10257	0.802961	2.65631e-06	55.7572	0.802961	2.65631e-06	55.7572	0	1	0	-	159	122	111	106	56	69	78	61	6.78062	6.66229	6.61888	6.6074	6.29333	6.37695	6.47319	6.38776	0.682239	0.555268	0.514782	0.498819	0.237331	0.299529	0.373898	0.304393
ENSMUSG00000035473	Galm	chr17:80127470-80185101	+	2476	0.802647	1.48364e-22	218.287	0.802647	1.48364e-22	218.287	0	1	0	-	535	546	495	475	296	306	278	254	8.78692	8.85252	8.78368	8.77005	8.35149	8.38388	8.3882	8.35587	9.50961	10.2945	9.50988	9.25978	5.19669	5.50277	5.52042	5.25059
ENSMUSG00000031951	Tmem231	chr8:111912017-111933791	-	2887	0.802601	1.79162e-12	117.468	0.802601	1.79162e-12	117.468	0	1	0	-	324	301	300	244	157	162	150	169	7.99546	7.98499	7.99268	7.86174	7.52654	7.55252	7.56809	7.66712	4.93921	4.86724	4.94305	4.07944	2.36395	2.49849	2.5546	2.99616
ENSMUSG00000022108	Itm2b	chr14:73362230-73385271	-	1773	0.801933	1.95315e-70	697.093	0.801933	1.95315e-70	697.093	0	1	0	-	6421	5885	5680	5424	3519	3545	2930	3043	12.3825	12.3569	12.3366	12.3162	11.8463	11.8641	11.7859	11.8565	159.387	154.953	152.391	147.662	86.2773	89.0262	81.2526	87.8452
ENSMUSG00000097504	4930516B21Rik	chr9:119440277-119444830	-	1195	0.801865	0.0139883	18.5424	0.801865	0.0139883	18.5424	0	1	0	-	24	13	19	14	8	4	4	12	3.67355	3.58915	3.64443	3.60303	3.53866	3.50156	3.50723	3.59272	0.883899	0.507854	0.756321	0.565481	0.29101	0.14904	0.164577	0.51397
ENSMUSG00000000093	Tbx2	chr11:85832550-85841948	+	3626	0.801587	0.00381389	24.1863	0.801587	0.00381389	24.1863	0	1	0	-	33	33	22	34	14	11	18	15	4.53458	4.54875	4.46344	4.56571	4.38517	4.3602	4.43809	4.41701	0.40054	0.424863	0.288613	0.452594	0.167836	0.135075	0.244075	0.211733
ENSMUSG00000031958	Ldhd	chr8:111623784-111630374	-	5328	0.801528	4.0788e-11	103.895	0.801528	4.0788e-11	103.895	0	1	0	-	213	216	215	196	113	120	122	104	7.44228	7.49112	7.49724	7.45164	7.08116	7.11907	7.18337	7.12188	1.75944	1.89257	1.91953	1.77562	0.921935	1.00283	1.12583	0.999065
ENSMUSG00000072763	5430403G16Rik	chr5:109674544-109691041	-	3341	0.801448	8.46217e-06	50.7252	0.801448	8.46217e-06	50.7252	0	1	0	-	95	95	91	79	60	54	43	35	6.18638	6.21459	6.20032	6.14566	5.999	5.96599	5.92562	5.87849	1.25143	1.32743	1.29564	1.14132	0.780658	0.71966	0.632806	0.536187
ENSMUSG00000023966	Rsph9	chr17:46122034-46144216	-	1602	0.800339	0.0027111	25.6685	0.800339	0.0027111	25.6685	0	1	0	-	34	31	31	37	14	23	17	11	4.65732	4.64889	4.65217	4.70486	4.49914	4.57794	4.54379	4.49231	0.934063	0.903363	0.920491	1.1148	0.379884	0.639257	0.521753	0.351443
ENSMUSG00000029153	Ociad2	chr5:73322198-73338947	-	2509	0.80014	3.76967e-07	64.237	0.80014	3.76967e-07	64.237	0	1	0	-	188	239	190	195	142	94	82	120	7.32389	7.523	7.37763	7.41043	7.16495	6.95861	6.94518	7.15937	3.29774	4.44693	3.60225	3.75139	2.46022	1.66816	1.60691	2.44797
ENSMUSG00000033065	Pfkm	chr15:98092588-98132447	+	2957	0.799942	9.30925e-42	410.311	0.799942	9.30925e-42	410.311	0	1	0	-	2353	2240	2187	2155	1445	1198	1144	1186	10.9481	10.9582	10.949	10.958	10.5277	10.3808	10.4266	10.4934	35.0211	35.3639	35.1818	35.1766	21.2423	18.0391	19.0219	20.5285
ENSMUSG00000030226	Lmo3	chr6:138362917-138581968	-	5049	0.799505	0.0187162	17.2778	0.799505	0.0187162	17.2778	0	1	0	-	6	10	10	10	6	0	2	2	2.49365	2.53545	2.53665	2.53879	2.49453	2.43606	2.45907	2.46035	0.0523004	0.0924608	0.0942139	0.0955988	0.0516573	0	0.0194761	0.0202745
ENSMUSG00000097183	Gm17501	chr3:145650311-145652093	+	1320	0.797779	6.11106e-07	62.1388	0.797779	6.11106e-07	62.1388	0	1	0	-	126	116	111	99	70	69	56	49	6.56294	6.55001	6.53384	6.48726	6.2924	6.29196	6.25185	6.22035	4.20103	4.10249	4.00009	3.62009	2.30521	2.32748	2.08589	1.89997
ENSMUSG00000028435	Aqp3	chr4:41092721-41098183	-	1829	0.797778	0.0120778	19.1801	0.797778	0.0120778	19.1801	0	1	0	-	27	17	18	11	8	9	8	6	3.76979	3.69699	3.70789	3.64646	3.6099	3.6204	3.61978	3.60251	0.649695	0.433909	0.468144	0.290293	0.190135	0.219098	0.215058	0.167904
ENSMUSG00000021806	Nid2	chr14:19751256-19811787	+	4884	0.795891	1.23828e-08	79.0718	0.795891	1.23828e-08	79.0718	0	1	0	-	14421	13506	13391	12914	6195	9402	7890	6072	13.5602	13.5552	13.5604	13.5492	12.8076	13.1869	13.1194	12.9255	129.951	129.096	130.424	127.627	55.1381	85.7146	79.4291	63.6328
ENSMUSG00000096917	2500002B13Rik	chr8:57488053-57508877	+	2618	0.795709	0.000233085	36.3249	0.795709	0.000233085	36.3249	0	1	0	-	72	65	63	47	27	42	28	31	5.65053	5.63262	5.62557	5.52819	5.35574	5.47073	5.39166	5.42792	1.21038	1.15906	1.1447	0.866535	0.448312	0.714315	0.525856	0.606061
ENSMUSG00000036186	Fam69b	chr2:26628456-26636497	+	2476	0.795594	4.5021e-20	193.466	0.795594	4.5021e-20	193.466	0	1	0	-	661	621	522	535	349	323	302	321	9.047	9.04479	8.9128	8.9528	8.55841	8.51243	8.53731	8.61278	11.7493	11.7086	10.0286	10.4294	6.12718	5.80847	5.99701	6.63558
ENSMUSG00000038517	Tbkbp1	chr11:97136170-97151495	-	3975	0.795556	1.78466e-20	197.484	0.795556	1.78466e-20	197.484	0	1	0	-	493	479	447	428	286	267	255	218	8.6517	8.67659	8.63225	8.6171	8.25496	8.21669	8.25524	8.1791	5.45845	5.62551	5.34923	5.19714	3.12763	2.99078	3.15414	2.80701
ENSMUSG00000003872	Lin7b	chr7:45367890-45370583	-	1463	0.795325	0.00588158	22.3051	0.795325	0.00588158	22.3051	0	1	0	-	27	23	23	27	11	16	8	12	4.23203	4.21138	4.21398	4.25231	4.10001	4.14623	4.08331	4.1285	0.81223	0.733917	0.747832	0.890794	0.326839	0.486952	0.268859	0.419818
ENSMUSG00000037499	Nenf	chr1:191306788-191318194	-	742	0.79472	1.92412e-26	257.158	0.79472	1.92412e-26	257.158	0	1	0	-	2073	1940	1640	1521	1063	1026	939	954	10.7125	10.7068	10.5659	10.5201	10.1382	10.1195	10.13	10.1791	122.957	122.057	105.138	98.9425	62.2752	61.5678	62.2214	65.8065
ENSMUSG00000031493	Ggn	chr7:29170219-29173933	+	2643	0.793223	0.00166396	27.7886	0.793223	0.00166396	27.7886	0	1	0	-	47	41	45	37	25	22	11	27	5.05353	5.0295	5.06225	5.01058	4.89653	4.8747	4.79272	4.94811	0.782637	0.724186	0.809908	0.675713	0.411177	0.370626	0.204632	0.522867
ENSMUSG00000038086	Hspb2	chr9:50751071-50752354	-	840	0.792813	2.98458e-10	95.2512	0.792813	2.98458e-10	95.2512	0	1	0	-	260	263	209	205	136	146	132	101	7.66446	7.71446	7.56529	7.5686	7.26775	7.31491	7.316	7.19653	13.6224	14.6164	11.8355	11.7796	7.03794	7.73898	7.72633	6.15413
ENSMUSG00000054931	Zkscan4	chr13:21478906-21485507	+	2400	0.79278	0.00538694	22.6866	0.79278	0.00538694	22.6866	0	1	0	-	38	23	34	29	17	20	6	16	4.58118	4.47864	4.57018	4.53635	4.41982	4.44753	4.33027	4.43562	0.696838	0.447383	0.673889	0.583236	0.30791	0.371047	0.122919	0.341219
ENSMUSG00000020331	Hcn2	chr10:79716633-79736108	+	3195	0.792375	6.51817e-07	61.8587	0.792375	6.51817e-07	61.8587	0	1	0	-	138	138	114	123	58	82	64	73	6.73657	6.77013	6.67173	6.72621	6.34511	6.48882	6.42834	6.50245	1.90094	2.01638	1.69728	1.8582	0.78912	1.14276	0.984889	1.16944
ENSMUSG00000028445	Enho	chr4:41638143-41640324	-	1269	0.791868	0.00974929	20.1103	0.791868	0.00974929	20.1103	0	1	0	-	23	19	27	24	17	9	4	12	4.08567	4.06241	4.13244	4.11229	4.03819	3.96794	3.92649	4.01322	0.797675	0.698965	1.0121	0.912867	0.582336	0.315785	0.15498	0.483999
ENSMUSG00000025887	Casp12	chr9:5345429-5373032	+	3840	0.791435	3.22313e-15	144.917	0.791435	3.22313e-15	144.917	0	1	0	-	660	582	638	549	370	382	252	344	9.06866	9.01376	9.10217	8.9972	8.62506	8.65814	8.43723	8.68801	7.56436	7.07546	7.90333	6.90079	4.18848	4.42937	3.22662	4.58513
ENSMUSG00000053825	Ppfia2	chr10:106470309-106933467	+	8021	0.79079	0.0194739	17.1055	0.79079	0.0194739	17.1055	0	1	0	-	10	5	10	6	3	3	0	2	2.28952	2.24642	2.29568	2.25844	2.22495	2.22537	2.19642	2.21934	0.0548695	0.0291008	0.0593051	0.0361061	0.0162584	0.0166534	0	0.0127622
ENSMUSG00000034868	Myl12b	chr17:70973919-70990787	-	1711	0.790587	1.20864e-39	389.177	0.790587	1.20864e-39	389.177	0	1	0	-	2574	2345	2255	2177	1433	1450	1112	1245	11.0562	11.0256	11.0023	10.9925	10.548	10.569	10.4312	10.5621	66.2092	63.9817	62.6927	61.4138	36.4068	37.7336	31.9546	37.2429
ENSMUSG00000045211	Nudt18	chr14:70577846-70582571	+	3716	0.790352	1.37756e-13	128.609	0.790352	1.37756e-13	128.609	0	1	0	-	410	394	393	346	233	263	204	158	8.37931	8.39476	8.40355	8.32413	7.984	8.07433	7.97271	7.84155	4.85588	4.94976	5.0308	4.49426	2.72563	3.1513	2.69919	2.17624
ENSMUSG00000020682	Mmp28	chr11:83440767-83463071	-	3874	0.790016	0.00919544	20.3643	0.790016	0.00919544	20.3643	0	1	0	-	28	18	17	23	8	13	10	8	4.02618	3.95547	3.94879	4.00488	3.86032	3.90707	3.89046	3.87466	0.318096	0.216908	0.208742	0.286567	0.0897669	0.149415	0.126917	0.105695
ENSMUSG00000020108	Ddit4	chr10:59949674-59951770	-	1685	0.789605	2.9938e-14	135.238	0.789605	2.9938e-14	135.238	0	1	0	-	462	473	499	437	319	239	220	261	8.60803	8.67448	8.72905	8.6417	8.34026	8.15102	8.16444	8.31004	12.0671	13.1046	14.0871	12.5181	8.22956	6.31551	6.4195	7.92803
ENSMUSG00000071424	Grid2	chr6:63255875-64668282	+	15257	0.789003	0.0178936	17.473	0.789003	0.0178936	17.473	0	1	0	-	4	12	6	6	2	0	2	2	2.05554	2.13462	2.07852	2.0799	2.03659	2.01674	2.03947	2.04061	0.0115385	0.0367177	0.0187069	0.0189819	0.00569832	0	0.00644524	0.00670943
ENSMUSG00000032131	Abcg4	chr9:44273187-44288615	-	5211	0.788624	0.0143002	18.4466	0.788624	0.0143002	18.4466	0	1	0	-	27	16	10	18	9	9	6	6	3.72917	3.64738	3.59351	3.67089	3.57849	3.57965	3.55841	3.56165	0.228035	0.143338	0.091285	0.166728	0.0750771	0.0769009	0.056612	0.0589325
ENSMUSG00000055675	Kbtbd11	chr8:15011024-15033333	+	7137	0.788597	0.00393833	24.0469	0.788597	0.00393833	24.0469	0	1	0	-	33	34	32	22	19	15	14	11	4.52846	4.55015	4.53823	4.46197	4.42184	4.38969	4.39506	4.37185	0.203497	0.222396	0.213282	0.148787	0.115724	0.0935806	0.0964474	0.0788863
ENSMUSG00000097003	D930007P13Rik	chr15:103123069-103146828	-	1324	0.788534	0.0171553	17.656	0.788534	0.0171553	17.656	0	1	0	-	19	7	16	18	8	6	5	5	3.42567	3.32404	3.41009	3.43159	3.33014	3.31205	3.30851	3.31125	0.631575	0.246816	0.574847	0.656209	0.262656	0.201778	0.185678	0.193289
ENSMUSG00000025738	Fbxl16	chr17:25809084-25821244	+	3478	0.788043	2.55446e-08	75.927	0.788043	2.55446e-08	75.927	0	1	0	-	169	170	151	150	78	103	79	90	7.06231	7.10237	7.03835	7.04883	6.6708	6.80441	6.72847	6.81028	2.13854	2.28183	2.06523	2.08171	0.97488	1.31861	1.1168	1.32446
ENSMUSG00000022971	Ifnar2	chr16:91372782-91405589	+	3329	0.787534	1.95874e-33	327.08	0.787534	1.95874e-33	327.08	0	1	0	-	2765	2694	2488	2208	1570	1605	1341	1189	11.1657	11.1976	11.1365	11.0491	10.6733	10.7033	10.6362	10.5715	36.5545	37.7787	35.5514	32.0142	20.5009	21.467	19.8058	18.2807
ENSMUSG00000085272	Gm1078	chr7:4965259-4971168	-	3197	0.787153	0.0179411	17.4615	0.787153	0.0179411	17.4615	0	1	0	-	12	15	14	12	6	7	6	2	3.19976	3.2332	3.22589	3.21013	3.14622	3.15654	3.15363	3.11323	0.165195	0.219034	0.208308	0.181174	0.0815821	0.0974912	0.0922756	0.0320193
ENSMUSG00000007646	Rad51c	chr11:87376644-87404954	-	4384	0.786917	8.72736e-21	200.591	0.786917	8.72736e-21	200.591	0	1	0	-	514	488	509	469	282	306	281	238	8.73446	8.74086	8.78628	8.73965	8.29694	8.3629	8.37468	8.29019	5.16003	5.19652	5.52291	5.16369	2.79618	3.10786	3.15148	2.77863
ENSMUSG00000030638	Sh3gl3	chr7:82173839-82307419	+	4319	0.786604	0.0177341	17.5119	0.786604	0.0177341	17.5119	0	1	0	-	14	20	16	8	8	4	6	5	3.33557	3.39589	3.36266	3.28956	3.28279	3.24518	3.27153	3.2638	0.142661	0.216177	0.176221	0.0894056	0.080518	0.041237	0.068304	0.0592531
ENSMUSG00000066829	Zfp810	chr9:22276747-22307638	-	3238	0.784728	3.74294e-11	104.268	0.784728	3.74294e-11	104.268	0	1	0	-	244	261	291	249	173	149	136	123	7.71272	7.80112	7.88962	7.7947	7.50108	7.42094	7.4279	7.39659	3.31644	3.76294	4.27501	3.71176	2.3225	2.04889	2.0651	1.94425
ENSMUSG00000034910	Pygo1	chr9:72925644-72952181	+	7916	0.784131	3.77893e-10	94.2263	0.784131	3.77893e-10	94.2263	0	1	0	-	322	288	298	268	153	218	157	124	7.99665	7.95848	7.99354	7.93398	7.51762	7.74346	7.60107	7.49129	1.79023	1.69844	1.79073	1.63413	0.840179	1.2262	0.975152	0.801753
ENSMUSG00000062044	Lmtk3	chr7:45783737-45804144	+	5744	0.783782	1.23669e-17	169.077	0.783782	1.23669e-17	169.077	-1.21069	2.38817e-07	66.2194	chr7:45787904-45788024	510	453	451	442	247	284	235	269	8.68434	8.63721	8.64472	8.64806	8.16132	8.26473	8.2054	8.32863	3.90765	3.68169	3.73493	3.7142	1.86925	2.20148	2.01155	2.39697
ENSMUSG00000035722	Abca7	chr10:79996493-80015572	+	6752	0.783287	3.23037e-29	284.907	0.783287	3.23037e-29	284.907	-1.08125	0.395882	4.02434	chr10:80000712-80000832	829	867	778	775	491	481	452	403	9.44861	9.53922	9.45755	9.47522	9.03556	9.02977	9.05998	9.00587	5.40358	5.99446	5.4811	5.54022	3.16108	3.17192	3.29143	3.0549
ENSMUSG00000018672	Copz2	chr11:96849869-96861203	+	2208	0.783151	1.60656e-35	347.941	0.783151	1.60656e-35	347.941	0	1	0	-	1876	1681	1599	1499	956	1058	850	877	10.5839	10.5385	10.5057	10.4694	10.0099	10.1047	10.0073	10.0686	37.3933	35.5412	34.4485	32.7688	18.8211	21.3352	18.9277	20.3294
ENSMUSG00000064264	Zfp428	chr7:24507005-24515682	+	1308	0.782869	3.61623e-25	244.417	0.782869	3.61623e-25	244.417	0	1	0	-	711	697	622	596	395	396	345	338	9.18583	9.21977	9.13547	9.12025	8.73124	8.74274	8.71629	8.73324	23.9233	24.8764	22.6205	21.9936	13.1273	13.4802	12.9685	13.2262
ENSMUSG00000037664	Cdkn1c	chr7:143458349-143461050	-	1931	0.782835	1.25418e-05	49.0164	0.782835	1.25418e-05	49.0164	0	1	0	-	1069	947	896	814	596	474	344	587	9.73442	9.68027	9.64393	9.5819	9.25449	9.08732	8.92883	9.36888	24.3644	22.8945	22.0722	20.347	13.4168	10.9296	8.759	15.559
ENSMUSG00000044786	Zfp36	chr7:28376783-28379255	-	1792	0.782812	1.65049e-27	267.824	0.782812	1.65049e-27	267.824	0	1	0	-	1200	1159	1065	941	628	684	602	537	9.9444	9.96697	9.90411	9.81707	9.41263	9.49089	9.46978	9.41387	29.4715	30.1932	28.2704	25.346	15.2338	16.9953	16.5172	15.3377
ENSMUSG00000005686	Ampd3	chr7:110768205-110812405	+	5605	0.782616	0.00752888	21.2327	0.782616	0.00752888	21.2327	0	1	0	-	29	42	23	26	25	12	10	10	4.4679	4.57957	4.43464	4.46489	4.43967	4.33059	4.32392	4.32912	0.22771	0.349814	0.195197	0.223901	0.193888	0.095327	0.0877208	0.0913164
ENSMUSG00000039670	Oxld1	chr11:120456605-120458068	-	813	0.782139	2.46876e-05	46.0752	0.782139	2.46876e-05	46.0752	0	1	0	-	101	80	94	76	40	52	54	42	6.19509	6.11339	6.19507	6.1074	5.8463	5.93198	5.98184	5.91144	5.46752	4.5937	5.49994	4.51212	2.13873	2.84789	3.26574	2.64413
ENSMUSG00000028565	Nfia	chr4:97772733-98118874	+	10891	0.781883	4.4169e-30	293.549	0.781883	4.4169e-30	293.549	-1.92994	8.64047e-15	140.635	chr4:98000392-98000464	857	784	850	769	500	497	424	415	9.47936	9.45444	9.53626	9.47076	9.05187	9.05723	9.01367	9.03041	3.46316	3.36056	3.71254	3.40813	1.99567	2.03188	1.91415	1.95032
ENSMUSG00000037266	D4Wsu53e	chr4:134923591-134927671	+	3349	0.781862	4.87971e-39	383.116	0.781862	4.87971e-39	383.116	-1.32277	1.95333e-23	227.092	chr4:134924704-134925008	4332	4191	4226	3629	2292	2582	2326	2025	11.8336	11.8592	11.8802	11.7604	11.2747	11.3891	11.386	11.3032	56.9289	58.4206	60.0254	52.3034	29.7499	34.3282	34.1486	30.9481
ENSMUSG00000037649	H2-DMa	chr17:34135181-34139101	+	1641	0.781732	0.000417849	33.7898	0.781732	0.000417849	33.7898	0	1	0	-	56	54	54	48	32	32	19	28	5.39006	5.39779	5.40259	5.36997	5.22956	5.23282	5.14819	5.23687	1.50189	1.5362	1.56533	1.41186	0.847671	0.868264	0.569277	0.873321
ENSMUSG00000003955	Fam162a	chr16:36043843-36071515	-	635	0.781457	5.73676e-34	332.413	0.781457	5.73676e-34	332.413	0	1	0	-	3301	2952	3224	2659	1865	1858	1484	1629	11.4248	11.3768	11.4723	11.3157	10.925	10.9329	10.8275	10.9438	228.787	217.023	241.514	202.117	127.671	130.281	114.905	131.302
ENSMUSG00000007021	Syngr3	chr17:24685091-24689955	-	2071	0.780424	7.8169e-10	91.0697	0.780424	7.8169e-10	91.0697	0	1	0	-	198	202	176	169	113	112	96	92	7.29767	7.34929	7.26916	7.25886	6.9824	6.98462	6.95942	6.96048	4.2077	4.55339	4.04253	3.9388	2.37183	2.40795	2.27913	2.2737
ENSMUSG00000073422	H2-Ke6	chr17:34026032-34028060	-	1533	0.779956	7.17794e-11	101.44	0.779956	7.17794e-11	101.44	0	1	0	-	491	415	340	321	210	249	195	213	8.52463	8.44117	8.30088	8.27636	7.93174	8.04817	7.95754	8.04127	14.0961	12.6377	10.5501	10.107	5.95474	7.23215	6.25419	7.11151
ENSMUSG00000076387	Mir671	chr5:24592113-24592211	+	98	0.779687	0.00148422	28.285	0.779687	0.00148422	28.285	0	1	0	-	51	52	46	51	23	43	21	16	5.27672	5.3031	5.26651	5.30921	5.0772	5.23144	5.08378	5.04611	22.9036	24.7708	22.3281	25.119	10.2021	19.5368	10.5359	8.35639
ENSMUSG00000035211	Xrra1	chr7:99859217-99917824	+	2631	0.779488	0.017584	17.5488	0.779488	0.017584	17.5488	0	1	0	-	19	22	17	10	5	12	3	8	3.60042	3.63482	3.59408	3.53239	3.47773	3.54371	3.46394	3.51928	0.317828	0.39036	0.307361	0.183458	0.0826105	0.203082	0.0560633	0.15563
ENSMUSG00000021916	Glt8d1	chr14:31001392-31012441	+	2521	0.779335	7.8144e-39	381.071	0.779335	7.8144e-39	381.071	0	1	0	-	1197	1150	1144	1157	675	717	618	615	9.98123	9.99901	10.0067	10.0386	9.51229	9.57095	9.53315	9.56392	20.8969	21.2955	21.5861	22.1523	11.639	12.6636	12.053	12.4861
ENSMUSG00000084864	1700027A07Rik	chr15:78911965-78913660	-	458	0.778775	0.00011986	39.2133	0.778775	0.00011986	39.2133	0	1	0	-	109	95	94	63	57	54	30	51	6.25086	6.21129	6.21272	6.04632	5.97659	5.96218	5.82147	5.9945	10.4742	9.68325	9.76299	6.63946	5.40998	5.24975	3.22058	5.6994
ENSMUSG00000060703	Cd302	chr2:60251992-60284488	-	1354	0.778706	9.47044e-09	80.2363	0.778706	9.47044e-09	80.2363	0	1	0	-	255	234	245	202	141	142	91	143	7.65194	7.63353	7.67503	7.55982	7.2887	7.30007	7.12402	7.38866	8.2886	8.0679	8.60732	7.20096	4.52675	4.6696	3.30446	5.40558
ENSMUSG00000040502	9-Mar	chr10:127055010-127060184	-	3037	0.777916	2.71106e-11	105.669	0.777916	2.71106e-11	105.669	0	1	0	-	306	317	253	274	152	194	160	135	7.9465	8.01642	7.86301	7.93714	7.50086	7.65533	7.59942	7.52565	4.43441	4.87279	3.96275	4.35475	2.17563	2.84425	2.59032	2.27517
ENSMUSG00000001119	Col6a1	chr10:76708791-76726168	-	4380	0.77767	8.32269e-20	190.797	0.77767	8.32269e-20	190.797	0	1	0	-	14519	13317	12349	13074	8902	7431	5823	7790	13.5659	13.5409	13.4824	13.5602	13.1249	12.9755	12.8511	13.146	145.889	141.937	134.115	144.076	88.3486	75.5411	65.3659	91.0307
ENSMUSG00000038235	F11r	chr1:171437534-171464603	+	2663	0.77749	1.87653e-43	427.266	0.77749	1.87653e-43	427.266	0	1	0	-	8494	7222	7271	7425	4399	4948	4179	3690	12.7818	12.6849	12.7045	12.7477	12.1927	12.308	12.2475	12.1762	140.379	126.605	129.88	134.581	71.8073	82.7311	77.1577	70.9218
ENSMUSG00000038886	Man2a2	chr7:80349097-80371375	-	6553	0.777339	4.75488e-38	373.229	0.777339	4.75488e-38	373.229	0	1	0	-	1371	1408	1364	1212	801	800	729	697	10.1822	10.2602	10.2441	10.1602	9.73664	9.74613	9.75294	9.7517	9.20782	10.0306	9.90136	8.9273	5.31347	5.43576	5.46973	5.44399
ENSMUSG00000032067	Pts	chr9:50521617-50528641	-	1035	0.776947	6.67251e-18	171.757	0.776947	6.67251e-18	171.757	0	1	0	-	541	500	480	422	285	318	244	245	8.76339	8.74787	8.72603	8.64286	8.2909	8.37708	8.26384	8.29646	23.0047	22.5524	22.0608	19.6802	11.9699	13.6803	11.5912	12.1158
ENSMUSG00000034919	Ttc22	chr4:106622431-106640189	+	3318	0.776566	0.0232519	16.3354	0.776566	0.0232519	16.3354	0	1	0	-	8	5	13	17	2	6	2	4	2.80724	2.78211	2.8607	2.90065	2.75008	2.79014	2.7537	2.77742	0.106114	0.0703488	0.186375	0.247304	0.0262023	0.0805165	0.0296368	0.0617033
ENSMUSG00000010651	Acaa1b	chr9:119148022-119157093	-	1962	0.776506	0.0139257	18.5618	0.776506	0.0139257	18.5618	0	1	0	-	23	19	12	19	8	6	9	9	3.76312	3.73984	3.67908	3.74583	3.63613	3.61832	3.65595	3.66013	0.515927	0.452083	0.29094	0.467425	0.177246	0.136164	0.225539	0.234784
ENSMUSG00000085517	Gm12963	chr4:130024255-130047774	-	1145	0.775749	0.023275	16.3311	0.775749	0.023275	16.3311	0	1	0	-	10	10	12	4	4	4	1	2	2.54739	2.55249	2.57241	2.49615	2.49253	2.49308	2.46546	2.47754	0.384374	0.407716	0.498536	0.168621	0.151859	0.155548	0.0429411	0.0894024
ENSMUSG00000056091	St3gal5	chr6:72097612-72154570	+	2448	0.77427	4.68315e-30	293.295	0.77427	4.68315e-30	293.295	0	1	0	-	1247	1249	1172	1070	658	710	639	667	10.0282	10.0834	10.0389	9.97992	9.50379	9.57456	9.57139	9.64098	22.4189	23.8185	22.7739	21.0975	11.6842	12.9139	12.8342	13.9457
ENSMUSG00000051224	Tceanc	chrX:166499811-166518567	-	4201	0.774004	1.6804e-06	57.7459	0.774004	1.6804e-06	57.7459	0	1	0	-	129	141	127	116	74	76	51	80	6.70373	6.78726	6.73536	6.69873	6.44388	6.46066	6.34821	6.54859	1.35144	1.56686	1.43804	1.33279	0.765711	0.80551	0.596892	0.97468
ENSMUSG00000026482	Rgl1	chr1:152516758-152766351	-	5590	0.77398	3.87476e-26	254.118	0.77398	3.87476e-26	254.118	-1.85133	1.36232e-06	58.6572	chr1:152674864-152675024	786	750	737	652	458	430	374	391	9.33996	9.35113	9.34805	9.2649	8.91539	8.87759	8.84965	8.91536	6.18828	6.26344	6.27157	5.62981	3.56156	3.42505	3.28956	3.58005
ENSMUSG00000040415	Dtx3	chr10:127190377-127195728	-	2572	0.773515	1.10052e-33	329.584	0.773515	1.10052e-33	329.584	0	1	0	-	2009	1990	1769	1701	1040	1103	1029	1045	10.7111	10.7577	10.6626	10.6492	10.1509	10.2102	10.2367	10.286	34.377	36.1198	32.7173	31.9221	17.5771	19.0948	19.6708	20.7955
ENSMUSG00000033429	Mcee	chr7:64392644-64412121	+	824	0.773507	3.22464e-08	74.9152	0.773507	3.22464e-08	74.9152	0	1	0	-	194	155	153	150	110	86	83	82	7.16716	7.06439	7.06485	7.06746	6.84957	6.73827	6.7699	6.78499	10.3618	8.78148	8.83252	8.78662	5.80299	4.64709	4.95255	5.09344
ENSMUSG00000015027	Galns	chr8:122578237-122611487	-	2585	0.773371	2.89689e-20	195.381	0.773371	2.89689e-20	195.381	0	1	0	-	756	811	631	664	436	423	377	378	9.29233	9.4043	9.20249	9.26567	8.86276	8.84981	8.83995	8.87443	12.8713	14.6462	11.6115	12.3984	7.33182	7.28601	7.17066	7.48438
ENSMUSG00000086607	4930511M06Rik	chr18:57373454-57552397	-	4161	0.773228	0.000402738	33.9498	0.773228	0.000402738	33.9498	0	1	0	-	63	49	62	46	33	29	26	28	5.47824	5.40955	5.49941	5.40115	5.28224	5.25493	5.25477	5.28232	0.66635	0.549745	0.708785	0.533603	0.344748	0.310321	0.307223	0.344417
ENSMUSG00000060961	Slc4a4	chr5:88886817-89239653	+	10815	0.773212	2.13968e-18	176.697	0.773212	2.13968e-18	176.697	-1.84876	4.30494e-17	163.66	chr5:89084640-89084720	1013	1029	1082	1033	580	679	632	459	9.76851	9.83484	9.89163	9.87217	9.32146	9.4565	9.48029	9.26378	4.12233	4.44173	4.75906	4.61033	2.33124	2.79546	2.87322	2.17225
ENSMUSG00000000901	Mmp11	chr10:75923221-75932502	-	2572	0.77255	1.52733e-13	128.161	0.77255	1.52733e-13	128.161	0	1	0	-	1038	1017	908	926	648	490	435	605	9.74768	9.7826	9.69535	9.73383	9.3637	9.15629	9.14374	9.4354	17.7618	18.4592	16.7933	17.3779	10.9519	8.48272	8.31566	12.0395
ENSMUSG00000074215	Gm10643	chr8:84063560-84065137	-	1577	0.77165	0.000187986	37.2588	0.77165	0.000187986	37.2588	0	1	0	-	79	65	61	75	37	53	30	30	5.83957	5.78294	5.76343	5.85837	5.58162	5.69551	5.55942	5.57112	2.20473	1.92418	1.84	2.29555	1.0199	1.49642	0.935337	0.973675
ENSMUSG00000020878	Lrrc46	chr11:97034601-97041407	-	1336	0.77137	0.00363351	24.3967	0.77137	0.00363351	24.3967	0	1	0	-	30	41	32	50	20	22	13	22	4.81146	4.90876	4.8446	4.98421	4.73468	4.75378	4.69062	4.78243	0.988267	1.43265	1.13937	1.80643	0.650743	0.733207	0.478427	0.842832
ENSMUSG00000030428	Ttyh1	chr7:4119407-4136706	+	6345	0.771295	0.0242752	16.1484	0.771295	0.0242752	16.1484	0	1	0	-	13	7	8	11	4	6	2	1	2.71475	2.66485	2.6755	2.70638	2.63339	2.65325	2.61727	2.60746	0.0901719	0.0515027	0.0599762	0.0836794	0.027404	0.0421046	0.015498	0.00806665
ENSMUSG00000027994	Ccdc109b	chr3:129914959-129970206	-	1318	0.770656	4.82139e-11	103.168	0.770656	4.82139e-11	103.168	0	1	0	-	327	306	296	313	202	148	155	189	8.05561	8.05061	8.03635	8.09566	7.73453	7.55622	7.64313	7.79354	10.9192	10.8385	10.6831	11.4627	6.66227	4.99984	5.78222	7.33958
ENSMUSG00000018166	Erbb3	chr10:128567522-128589652	-	6016	0.770331	3.21804e-06	54.9241	0.770331	3.21804e-06	54.9241	-1.07498	1	0	chr10:128570056-128570352	139	121	106	98	77	73	55	50	6.64667	6.60213	6.53917	6.51157	6.36127	6.3444	6.27485	6.25717	1.01687	0.938946	0.838144	0.786278	0.556377	0.540288	0.449504	0.42539
ENSMUSG00000073096	Lrrc61	chr6:48554795-48570722	+	2913	0.769889	1.18059e-05	49.279	0.769889	1.18059e-05	49.279	0	1	0	-	93	123	114	107	75	52	52	60	6.38357	6.55624	6.52237	6.50147	6.29486	6.1614	6.19873	6.2693	1.40508	1.97119	1.86159	1.77297	1.1192	0.794828	0.87769	1.05423
ENSMUSG00000042613	Pbxip1	chr3:89436705-89450952	+	4674	0.769766	1.55551e-24	238.081	0.769766	1.55551e-24	238.081	0	1	0	-	1179	1198	1132	963	637	641	611	637	9.94537	10.0132	9.97497	9.85415	9.44206	9.45723	9.49971	9.56809	11.1016	11.9655	11.5207	9.94478	5.9243	6.10632	6.42733	6.9755
ENSMUSG00000072915	Gm12258	chr11:58847157-58861956	+	4429	0.769534	0.000427765	33.688	0.769534	0.000427765	33.688	0	1	0	-	59	59	72	44	33	35	29	27	5.52382	5.54545	5.63045	5.45703	5.35214	5.37049	5.35009	5.34414	0.586281	0.621884	0.773299	0.479518	0.323888	0.351862	0.321937	0.31202
ENSMUSG00000096603	Gm7694	chr1:170298192-170306332	-	3833	0.768946	1.8521e-06	57.3234	0.768946	1.8521e-06	57.3234	0	1	0	-	145	147	169	113	84	98	76	59	6.87108	6.91278	7.00315	6.78788	6.60422	6.68049	6.61184	6.52845	1.6649	1.79037	2.09734	1.42298	0.952635	1.13841	0.974884	0.78784
ENSMUSG00000046027	Stard5	chr7:83631958-83653127	+	5450	0.76879	1.89029e-19	187.235	0.76879	1.89029e-19	187.235	1.15133	1	0	chr7:83650928-83653128	748	664	583	613	356	400	383	333	9.22601	9.17569	9.07877	9.1407	8.65239	8.74704	8.79056	8.71914	6.04039	5.68768	5.08853	5.42902	2.83948	3.26794	3.45526	3.12732
ENSMUSG00000032841	Prr5l	chr2:101714284-101883027	-	4967	0.768221	6.93166e-12	111.592	0.768221	6.93166e-12	111.592	0	1	0	-	251	242	230	221	138	138	126	128	7.65736	7.67323	7.64761	7.63687	7.29406	7.30139	7.30832	7.34177	2.22402	2.27449	2.20269	2.14761	1.20773	1.23707	1.24725	1.31899
ENSMUSG00000006850	Tmco6	chr18:36735067-36742391	+	1817	0.768011	6.1599e-11	102.104	0.768011	6.1599e-11	102.104	0	1	0	-	397	383	334	304	225	190	160	218	8.29755	8.31588	8.22175	8.1698	7.90212	7.80302	7.76194	7.98642	9.61601	9.84027	8.74404	8.07563	5.38287	4.65596	4.32956	6.14082
ENSMUSG00000039798	2600006K01Rik	chr2:29868725-29869785	-	871	0.767659	0.00755816	21.2158	0.767659	0.00755816	21.2158	0	1	0	-	27	28	27	24	15	8	11	17	4.3203	4.34075	4.33561	4.3156	4.22389	4.16174	4.20168	4.26583	1.36429	1.50073	1.47457	1.33	0.748616	0.408961	0.620945	0.998977
ENSMUSG00000085271	E130006D01Rik	chr5:111734283-111761725	-	928	0.767617	0.0250429	16.0132	0.767617	0.0250429	16.0132	0	1	0	-	9	12	8	8	1	3	5	3	2.61657	2.64934	2.6128	2.61463	2.54116	2.56136	2.58616	2.56677	0.426829	0.603666	0.410074	0.416102	0.0468423	0.143941	0.264911	0.165462
ENSMUSG00000038351	Sgsm2	chr11:74849260-74897060	-	6884	0.767313	2.52496e-22	215.977	0.767313	2.52496e-22	215.977	0	1	0	-	778	732	634	680	406	442	360	392	9.31036	9.30948	9.19991	9.27933	8.8028	8.87608	8.79905	8.89501	4.97391	4.96402	4.38096	4.76789	2.56372	2.85885	2.57122	2.91454
ENSMUSG00000071506	Tmem139	chr6:42261969-42264555	+	1147	0.76697	0.0251034	16.0027	0.76697	0.0251034	16.0027	0	1	0	-	7	7	11	10	5	1	3	2	2.50736	2.51124	2.55047	2.54319	2.48939	2.45057	2.47416	2.46474	0.268593	0.284904	0.456194	0.420818	0.189493	0.0388192	0.128599	0.0892465
ENSMUSG00000074733	5830428H23Rik	chr19:61053839-61140840	-	6513	0.766552	2.49125e-12	116.036	0.766552	2.49125e-12	116.036	0	1	0	-	288	312	294	264	154	173	166	158	7.91373	8.01553	7.98183	7.92147	7.51991	7.59603	7.63332	7.62995	1.94613	2.23633	2.14727	1.9565	1.02784	1.1827	1.25316	1.24165
ENSMUSG00000021390	Ogn	chr13:49608070-49624500	+	2540	0.766196	8.13152e-06	50.8983	0.766196	8.13152e-06	50.8983	0	1	0	-	1077	956	993	928	692	516	365	597	9.78143	9.72935	9.77498	9.73691	9.41798	9.19648	9.01724	9.42567	18.6613	17.5706	18.5967	17.6349	11.8429	9.04537	7.06541	12.03
ENSMUSG00000004952	Rasa4	chr5:136083915-136111860	+	6191	0.765787	7.78387e-06	51.088	0.765787	7.78387e-06	51.088	0	1	0	-	157	162	149	148	92	66	67	111	6.98156	7.03618	6.99384	7.0042	6.70657	6.57081	6.62004	6.88108	1.11609	1.22157	1.14484	1.15387	0.645971	0.474672	0.532099	0.917671
ENSMUSG00000021460	Auh	chr13:52835118-52929681	-	9580	0.765055	1.50892e-18	178.213	0.765055	1.50892e-18	178.213	0	1	0	-	676	689	587	572	391	410	299	333	9.12034	9.18709	9.06421	9.063	8.69935	8.7444	8.58913	8.69777	3.10557	3.35751	2.91469	2.88196	1.77418	1.90559	1.53456	1.77911
ENSMUSG00000086968	4933431E20Rik	chr3:107888849-107896213	-	6821	0.765016	4.89424e-14	133.103	0.765016	4.89424e-14	133.103	0	1	0	-	316	317	313	283	185	195	155	160	8.0265	8.07283	8.07364	8.01738	7.67583	7.71669	7.63932	7.68493	2.03891	2.16957	2.18281	2.00261	1.17899	1.27291	1.11728	1.2006
ENSMUSG00000032417	Rwdd2a	chr9:86572052-86574896	+	1315	0.764812	0.000120956	39.1737	0.764812	0.000120956	39.1737	0	1	0	-	63	70	76	63	37	41	37	32	5.72657	5.79095	5.83097	5.76372	5.56221	5.59411	5.59483	5.56797	2.1085	2.48505	2.74921	2.31245	1.2231	1.38825	1.38342	1.24551
ENSMUSG00000026504	Sdccag8	chr1:176814659-177020437	+	4129	0.764209	6.15942e-16	152.105	0.764209	6.15942e-16	152.105	0	1	0	-	416	440	424	373	235	268	231	203	8.44801	8.53902	8.52059	8.43949	8.04971	8.14673	8.11507	8.05868	4.43413	4.97475	4.88474	4.36035	2.47405	2.89001	2.75071	2.51638
ENSMUSG00000081552	Gm12328	chr11:73771923-73772120	-	197	0.764023	0.0252112	15.9841	0.764023	0.0252112	15.9841	0	1	0	-	17	6	8	14	3	4	4	5	2.97694	2.88201	2.90267	2.96251	2.85006	2.86049	2.86535	2.87842	3.79789	1.42183	1.93172	3.4302	0.661974	0.904074	0.998325	1.29906
ENSMUSG00000033965	Slc16a2	chrX:103697413-103821965	-	4244	0.763756	4.60406e-06	53.3686	0.763756	4.60406e-06	53.3686	0	1	0	-	1519	1649	1637	1221	739	1063	895	630	10.3288	10.4583	10.4644	10.222	9.7322	10.0408	9.98075	9.73134	15.7522	18.1388	18.3482	13.8867	7.56929	11.1524	10.3687	7.59783
ENSMUSG00000043629	1700019D03Rik	chr1:52922323-52963260	-	4003	0.762751	0.0185567	17.315	0.762751	0.0185567	17.315	0	1	0	-	3	5	10	5	2	1	1	0	1.71539	1.73722	1.78646	1.73902	1.70604	1.69631	1.69788	1.68726	0.0329834	0.0583106	0.118832	0.0602896	0.0217185	0.0111231	0.0122827	0
ENSMUSG00000044250	Pced1b	chr15:97247106-97385689	+	2198	0.762394	0.000320252	34.9451	0.762394	0.000320252	34.9451	0	1	0	-	83	83	69	50	31	48	36	37	5.87642	5.90187	5.82882	5.71711	5.55718	5.68004	5.62565	5.64611	1.66192	1.76284	1.49328	1.09799	0.613084	0.972352	0.805292	0.861586
ENSMUSG00000002804	Nudt14	chr12:112934732-112942118	-	793	0.7622	8.2109e-23	220.856	0.7622	8.2109e-23	220.856	0	1	0	-	694	606	562	597	370	370	333	326	9.12816	9.06467	9.01387	9.08409	8.6437	8.65321	8.65072	8.66703	38.5164	35.6749	33.7119	36.3378	20.2822	20.7749	20.6466	21.0411
ENSMUSG00000049493	Pls1	chr9:95752641-95845311	-	3890	0.761657	0.00824928	20.8358	0.761657	0.00824928	20.8358	0	1	0	-	29	21	35	20	14	14	12	11	4.31991	4.26696	4.38289	4.26505	4.19922	4.20095	4.19554	4.19106	0.328101	0.252019	0.427995	0.248164	0.156446	0.160247	0.151674	0.144733
ENSMUSG00000086529	4930471I20Rik	chr2:155547039-155556930	-	629	0.761587	0.0229354	16.3949	0.761587	0.0229354	16.3949	0	1	0	-	19	12	7	17	6	6	4	6	3.30933	3.25534	3.2087	3.30607	3.19491	3.19574	3.18148	3.20547	1.32942	0.890623	0.52938	1.30454	0.414655	0.424728	0.312671	0.488231
ENSMUSG00000076435	Acsf2	chr11:94557101-94601871	-	3432	0.761348	5.8744e-19	182.31	0.761348	5.8744e-19	182.31	0	1	0	-	625	649	530	534	361	349	300	319	9.00752	9.0893	8.93265	8.95872	8.59085	8.57578	8.54063	8.61615	8.01479	8.82797	7.34597	7.5102	4.57242	4.52781	4.29786	4.75738
ENSMUSG00000020882	Cacnb1	chr11:98001507-98023034	-	4529	0.761109	8.30572e-09	80.8062	0.761109	8.30572e-09	80.8062	0	1	0	-	239	233	183	216	111	142	132	103	7.55542	7.57864	7.4276	7.55267	7.10888	7.24742	7.26399	7.15391	2.3225	2.40169	1.92207	2.30202	1.06539	1.39603	1.43301	1.16402
ENSMUSG00000001739	Cldn15	chr5:136966615-136975858	+	2124	0.760974	9.39561e-26	250.271	0.760974	9.39561e-26	250.271	0	1	0	-	2912	2623	2301	2375	1364	1655	1382	1405	11.2208	11.1795	11.0714	11.1231	10.5625	10.7372	10.6693	10.7204	60.3388	57.651	51.5327	53.9718	27.9155	34.6939	31.9913	33.8568
ENSMUSG00000051007	Pddc1	chr7:141408134-141414136	-	2871	0.760775	2.07677e-20	196.826	0.760775	2.07677e-20	196.826	0	1	0	-	704	611	583	593	373	358	319	365	9.14818	9.07948	9.05209	9.08646	8.65799	8.63764	8.62818	8.75918	10.7919	9.93508	9.65953	9.96963	5.64757	5.55214	5.46306	6.50705
ENSMUSG00000004791	Pgf	chr12:85166638-85177296	-	1582	0.760769	0.000163634	37.8613	0.760769	0.000163634	37.8613	0	1	0	-	77	85	68	68	52	31	45	33	5.90179	5.97152	5.88013	5.89002	5.75795	5.6141	5.74847	5.66992	2.14212	2.50828	2.04467	2.07472	1.42884	0.8725	1.39857	1.06766
ENSMUSG00000050737	Ptges	chr2:30889470-30929863	-	3931	0.760735	0.0259473	15.8591	0.760735	0.0259473	15.8591	0	1	0	-	10	9	9	11	3	4	4	3	2.73375	2.72951	2.73065	2.75196	2.66908	2.67937	2.68397	2.6751	0.111958	0.106882	0.108908	0.135066	0.0331745	0.0453072	0.0500306	0.039061
ENSMUSG00000026688	Mgst3	chr1:167371965-167393841	-	1097	0.760532	2.91386e-05	45.3553	0.760532	2.91386e-05	45.3553	0	1	0	-	83	113	83	89	57	53	48	44	6.16156	6.34017	6.19449	6.23841	6.01769	5.9969	5.9991	5.98531	3.3299	4.80878	3.59908	3.91599	2.25868	2.15119	2.15136	2.05291
ENSMUSG00000097093	C330013E15Rik	chr15:100614139-100615110	-	878	0.759639	0.0234401	16.3004	0.759639	0.0234401	16.3004	0	1	0	-	13	14	13	10	7	3	6	4	3.13701	3.15266	3.14516	3.11942	3.08409	3.04637	3.08198	3.06342	0.651641	0.744383	0.704319	0.549747	0.346569	0.152138	0.335997	0.233179
ENSMUSG00000018750	Zbtb4	chr11:69765911-69784023	+	8117	0.759594	1.01066e-19	189.954	0.759594	1.01066e-19	189.954	0	1	0	-	739	699	674	626	371	433	420	334	9.24843	9.25206	9.23297	9.19138	8.71751	8.84132	8.89533	8.75672	4.0069	4.02017	3.94989	3.72252	1.98685	2.37521	2.54409	2.10608
ENSMUSG00000056735	A930024E05Rik	chr5:122989353-122998345	+	1896	0.75954	2.92066e-05	45.3452	0.75954	2.92066e-05	45.3452	0	1	0	-	105	88	81	76	60	50	43	39	6.21777	6.16051	6.12864	6.11096	5.98168	5.92259	5.90822	5.89238	2.43731	2.16674	2.0322	1.93479	1.37562	1.1742	1.11509	1.05281
ENSMUSG00000020836	Coro6	chr11:77462410-77470484	+	3011	0.759354	0.00470906	23.2707	0.759354	0.00470906	23.2707	0	1	0	-	39	29	25	38	16	20	13	17	4.68809	4.62772	4.59822	4.70706	4.51128	4.5476	4.50069	4.54568	0.570051	0.449625	0.394957	0.609159	0.230991	0.295753	0.212281	0.288977
ENSMUSG00000038387	Rras	chr7:45017977-45021646	+	1103	0.759209	9.92213e-20	190.034	0.759209	9.92213e-20	190.034	0	1	0	-	972	962	871	802	543	510	448	548	9.65133	9.69489	9.62017	9.57007	9.18278	9.14448	9.12339	9.31445	38.7838	40.7158	37.5632	35.0959	21.3998	20.5876	19.9701	25.429
ENSMUSG00000085287	4833418N02Rik	chr17:87274885-87282814	-	2762	0.758851	0.0171578	17.6554	0.758851	0.0171578	17.6554	0	1	0	-	13	22	18	18	11	10	6	5	3.65132	3.73688	3.70491	3.7086	3.63525	3.62745	3.59729	3.58988	0.207147	0.371845	0.310005	0.314562	0.173123	0.161208	0.106809	0.0926554
ENSMUSG00000041481	Serpina3g	chr12:104236244-104241939	+	2105	0.758508	0.00643126	21.917	0.758508	0.00643126	21.917	0	1	0	-	31	36	48	30	24	14	10	24	4.74526	4.79727	4.8862	4.76046	4.69438	4.61289	4.58952	4.72642	0.64814	0.798387	1.0847	0.687903	0.495616	0.296133	0.233575	0.583558
ENSMUSG00000049411	Tmem241	chr18:11981302-12121480	-	3336	0.758162	1.92937e-08	77.1459	0.758162	1.92937e-08	77.1459	0	1	0	-	167	181	177	161	98	103	83	101	7.1266	7.2134	7.2079	7.16373	6.84641	6.87697	6.82415	6.94117	2.20318	2.53289	2.52387	2.32947	1.27699	1.37474	1.22329	1.5496
ENSMUSG00000022620	Arsa	chr15:89472475-89477425	-	3680	0.757916	9.93382e-36	350.029	0.757916	9.93382e-36	350.029	0	1	0	-	1485	1391	1295	1313	880	836	687	741	10.2703	10.2656	10.2139	10.2482	9.83128	9.79981	9.7232	9.81939	17.7598	17.6458	16.7395	17.2216	10.3949	10.1151	9.17883	10.3061
ENSMUSG00000001948	Spa17	chr9:37603294-37613720	-	689	0.757518	0.000451873	33.4498	0.757518	0.000451873	33.4498	0	1	0	-	57	56	50	55	32	32	31	22	5.44024	5.45484	5.41976	5.4618	5.27365	5.27693	5.29511	5.22871	3.64095	3.7943	3.452	3.85302	2.01891	2.06795	2.21218	1.63429
ENSMUSG00000030804	Gm21974	chr7:127886226-127895454	-	2037	0.756723	1.32526e-16	158.777	0.756723	1.32526e-16	158.777	0	1	0	-	849	813	656	689	460	430	370	448	9.4238	9.43816	9.26735	9.32916	8.93733	8.89635	8.86069	9.03839	18.3432	18.6321	15.3191	16.3262	9.81641	9.39913	8.93077	11.2567
ENSMUSG00000010660	Plcd1	chr9:119071526-119093496	-	2651	0.756454	6.54133e-15	141.843	0.756454	6.54133e-15	141.843	0	1	0	-	458	445	397	355	234	268	231	208	8.52442	8.54898	8.46989	8.40259	8.04793	8.14773	8.11608	8.07558	7.60353	7.83634	7.12363	6.46363	3.837	4.50127	4.28431	4.01586
ENSMUSG00000036585	Fgf1	chr18:38838672-38929404	-	4648	0.755929	0.0267622	15.7248	0.755929	0.0267622	15.7248	0	1	0	-	18	15	7	7	4	3	4	6	3.04569	3.02737	2.95316	2.95491	2.92019	2.91087	2.92572	2.9496	0.170438	0.150657	0.0716395	0.0726925	0.0374093	0.0287386	0.0423128	0.0660708
ENSMUSG00000024818	Slc25a45	chr19:5877807-5885766	+	2650	0.754999	0.00648939	21.878	0.754999	0.00648939	21.878	0	1	0	-	29	30	33	22	18	15	11	13	4.43786	4.45868	4.48505	4.4011	4.35269	4.32888	4.30543	4.33054	0.481628	0.528492	0.592364	0.400714	0.295265	0.252032	0.204092	0.251086
ENSMUSG00000036661	Dennd3	chr15:73512559-73572242	+	5703	0.754505	1.75956e-09	87.546	0.754505	1.75956e-09	87.546	-1.043	1	0	chr15:73567032-73567168	212	238	217	208	125	121	140	108	7.48401	7.60216	7.54832	7.53609	7.17945	7.1693	7.30693	7.1878	1.63603	1.94821	1.80999	1.76043	0.95278	0.944696	1.20699	0.969271
ENSMUSG00000029821	Dfna5	chr6:50189368-50263862	-	7375	0.75447	1.17994e-28	279.281	0.75447	1.17994e-28	279.281	-1.24783	2.57754e-53	525.888	chr6:50261732-50262024	1255	1165	1190	988	721	712	618	587	10.0199	10.0071	10.0385	9.89575	9.5613	9.56161	9.52942	9.52305	7.4893	7.37441	7.67548	6.46625	4.24971	4.29861	4.12007	4.07381
ENSMUSG00000079669	Gm17396	chr9:117252535-117254696	+	1655	0.752927	0.00174052	27.5932	0.752927	0.00174052	27.5932	0	1	0	-	54	67	35	49	28	33	28	19	5.33542	5.43788	5.22538	5.33483	5.15647	5.19805	5.18363	5.11405	1.436	1.88991	1.00598	1.42908	0.735438	0.887822	0.831837	0.587598
ENSMUSG00000005917	Otx1	chr11:21994763-22002897	-	5422	0.752767	4.29841e-07	63.6669	0.752767	4.29841e-07	63.6669	0	1	0	-	174	164	129	142	94	73	88	85	7.04289	7.04271	6.90967	6.9787	6.71629	6.611	6.74023	6.74474	1.41237	1.41204	1.13175	1.26411	0.753623	0.599478	0.797997	0.802387
ENSMUSG00000022323	Hrsp12	chr15:34484020-34495255	-	3192	0.751649	1.7834e-12	117.488	0.751649	1.7834e-12	117.488	0	1	0	-	387	388	383	344	260	206	173	217	8.32581	8.37383	8.37449	8.3107	8.04846	7.90386	7.85987	8.03315	5.3359	5.67456	5.70764	5.2018	3.54076	2.87352	2.66478	3.47954
ENSMUSG00000027435	Cd93	chr2:148436639-148443563	-	6677	0.751092	0.0155446	18.0842	0.751092	0.0155446	18.0842	0	1	0	-	20	20	18	33	8	10	8	16	4.05084	4.06081	4.04555	4.17607	3.94674	3.96673	3.95744	4.04218	0.131828	0.139834	0.128236	0.238556	0.0520828	0.0666851	0.0589097	0.122649
ENSMUSG00000026170	Cyp27a1	chr1:74713573-74737890	+	1890	0.750634	0.0214689	16.6819	0.750634	0.0214689	16.6819	0	1	0	-	19	21	13	14	8	6	12	3	3.60612	3.63216	3.56369	3.57591	3.51161	3.49378	3.56061	3.47177	0.442437	0.518705	0.327192	0.357539	0.183998	0.141351	0.312175	0.0812426
ENSMUSG00000042428	Mgat3	chr15:80173720-80215519	+	4665	0.750351	1.1937e-21	209.231	0.750351	1.1937e-21	209.231	0	1	0	-	1574	1467	1355	1325	913	859	662	847	10.3459	10.3365	10.2776	10.2794	9.88644	9.84697	9.71945	9.95481	14.8495	14.6805	13.8168	13.7095	8.50756	8.19883	6.97726	9.29301
ENSMUSG00000028378	Ptgr1	chr4:58965438-58987119	-	2296	0.749488	2.01126e-22	216.965	0.749488	2.01126e-22	216.965	0	1	0	-	1162	1011	1023	938	713	575	524	563	9.89039	9.82042	9.84304	9.78845	9.48688	9.32615	9.33305	9.42352	22.2738	20.5562	21.1946	19.7192	13.4991	11.1508	11.2212	12.5505
ENSMUSG00000032353	Tmed3	chr9:89699202-89705043	-	1324	0.748176	4.69007e-44	433.288	0.748176	4.69007e-44	433.288	0	1	0	-	1992	1807	1830	1662	1162	1077	984	985	10.6955	10.6614	10.6857	10.6203	10.2345	10.1818	10.1908	10.2278	66.2157	63.7138	65.7482	60.59	38.1508	36.2191	36.5414	38.0779
ENSMUSG00000017400	Stac2	chr11:98036622-98053462	-	3139	0.746841	1.71959e-06	57.6458	0.746841	1.71959e-06	57.6458	0	1	0	-	207	200	182	174	131	77	95	123	7.34772	7.36399	7.3117	7.29848	7.0817	6.83158	6.97551	7.13452	2.90228	2.97442	2.75804	2.67557	1.81412	1.09222	1.48803	2.00557
ENSMUSG00000024232	Bambi	chr18:3507956-3516404	+	5040	0.745883	1.47848e-14	138.302	0.745883	1.47848e-14	138.302	0	1	0	-	649	622	622	573	311	409	389	303	9.07486	9.08941	9.10103	9.05299	8.52331	8.73062	8.76929	8.61729	5.66727	5.76133	5.87057	5.48759	2.68235	3.61329	3.79487	3.07707
ENSMUSG00000040618	Pck2	chr14:55540265-55550017	+	3400	0.745829	8.75485e-53	520.578	0.745829	8.75485e-53	520.578	0	1	0	-	2478	2438	2328	2278	1397	1471	1360	1280	11.0399	11.0805	11.0507	11.0533	10.5476	10.6022	10.6214	10.6066	32.0761	33.4748	32.5705	32.3394	17.8609	19.2639	19.667	19.2688
ENSMUSG00000063698	Sfxn4	chr19:60837276-60861479	-	2975	0.745491	0.000256818	35.9038	0.745491	0.000256818	35.9038	0	1	0	-	115	76	89	88	55	50	31	64	6.31041	6.14033	6.21835	6.22436	5.996	5.96814	5.86197	6.11459	1.70126	1.19259	1.42306	1.42775	0.80364	0.74833	0.512334	1.10108
ENSMUSG00000092356	Gm20532	chr2:26586638-26635634	+	780	0.745458	1.04018e-11	109.829	0.745458	1.04018e-11	109.829	0	1	0	-	375	304	273	285	188	176	176	165	8.16115	8.04817	7.98025	8.02883	7.69221	7.65998	7.72308	7.7103	21.1591	18.1946	16.649	17.6363	10.4773	10.0468	11.0942	10.8271
ENSMUSG00000059970	Hspa2	chr12:76404175-76406934	+	2520	0.745224	1.2459e-18	179.045	0.745224	1.2459e-18	179.045	0	1	0	-	734	653	598	616	391	437	315	354	9.21299	9.16474	9.10292	9.14793	8.72396	8.81698	8.65104	8.76759	12.819	12.0969	11.2881	11.7988	6.74469	7.72131	6.14594	7.18997
ENSMUSG00000013921	Clip3	chr7:30291671-30308367	+	3991	0.744126	2.37382e-43	426.246	0.744126	2.37382e-43	426.246	0	1	0	-	2706	2566	2484	2235	1579	1502	1316	1384	11.1459	11.1525	11.1353	11.0606	10.6787	10.6471	10.6207	10.7003	29.8405	30.015	29.6067	27.0305	17.1983	16.7571	16.2126	17.7492
ENSMUSG00000084866	A930006K02Rik	chr16:91465103-91470121	+	776	0.743118	0.0124809	19.0375	0.743118	0.0124809	19.0375	0	1	0	-	20	23	24	22	11	8	12	12	4.04623	4.08133	4.09221	4.07985	3.97093	3.94472	3.99339	3.99871	1.1343	1.38366	1.47119	1.36842	0.616193	0.459027	0.760323	0.791488
ENSMUSG00000086805	4932443L11Rik	chr8:4162521-4206882	-	2827	0.742685	1.87262e-05	47.2755	0.742685	1.87262e-05	47.2755	0	1	0	-	97	90	85	96	49	55	48	53	6.24311	6.23548	6.21511	6.285	5.97619	6.01969	6.0091	6.05981	1.5101	1.48621	1.43026	1.63909	0.753453	0.866258	0.834822	0.959566
ENSMUSG00000003123	Lipe	chr7:25379526-25398710	-	4518	0.742558	7.34649e-10	91.3392	0.742558	7.34649e-10	91.3392	0	1	0	-	321	239	233	230	154	150	137	141	7.8986	7.72987	7.72189	7.72968	7.42264	7.4151	7.42233	7.46443	3.12693	2.46953	2.45318	2.45719	1.4817	1.47827	1.49091	1.59734
ENSMUSG00000070705	Eid2b	chr7:28277705-28280129	+	2424	0.742524	4.942e-08	73.061	0.742524	4.942e-08	73.061	0	1	0	-	207	185	151	167	102	102	109	89	7.29278	7.25825	7.14126	7.21743	6.89706	6.90356	6.98949	6.90972	3.75835	3.56289	2.96323	3.32538	1.82917	1.8736	2.21092	1.87924
ENSMUSG00000034687	Fras1	chr5:96373954-96784728	+	15848	0.742414	1.21051e-11	109.17	0.742414	1.21051e-11	109.17	-1.29864	0.108885	9.63033	chr5:96744640-96744784	378	377	427	467	239	261	221	226	8.37758	8.42122	8.52909	8.62047	8.06376	8.13156	8.08853	8.13277	1.04973	1.11053	1.28166	1.42233	0.655555	0.733291	0.68564	0.729892
ENSMUSG00000005237	Dnah2	chr11:69420808-69549110	-	14810	0.742066	0.0264475	15.7761	0.742066	0.0264475	15.7761	0	1	0	-	21	7	15	15	5	7	8	4	3.40965	3.29147	3.36842	3.37158	3.26903	3.28911	3.30691	3.26774	0.0624056	0.0220651	0.0481789	0.0488871	0.0146758	0.0210452	0.0265591	0.0138239
ENSMUSG00000049791	Fzd4	chr7:89404365-89410110	+	3685	0.741323	4.83557e-10	93.1555	0.741323	4.83557e-10	93.1555	0	1	0	-	292	282	289	296	145	203	175	140	7.92832	7.94619	7.97399	8.00934	7.49079	7.70032	7.6708	7.56306	3.48743	3.57252	3.73062	3.87714	1.71047	2.45284	2.33496	1.94453
ENSMUSG00000038199	4931409K22Rik	chr5:24543433-24555469	-	2670	0.740955	0.030081	15.2171	0.740955	0.030081	15.2171	0	1	0	-	10	10	3	8	2	2	3	2	2.33275	2.33776	2.27011	2.32157	2.25829	2.25863	2.27203	2.26254	0.164835	0.174844	0.0534479	0.144623	0.0325615	0.0333525	0.0552444	0.0383392
ENSMUSG00000097910	5033428I22Rik	chr8:57332117-57340682	+	2040	0.740661	0.01089	19.6297	0.740661	0.01089	19.6297	0	1	0	-	22	36	22	25	12	18	12	10	4.27411	4.39652	4.28751	4.3177	4.19082	4.24542	4.20502	4.19038	0.474627	0.823826	0.512995	0.591517	0.255704	0.392873	0.289221	0.250896
ENSMUSG00000060591	Ifitm2	chr7:140954838-140955961	-	627	0.739795	2.46709e-40	396.078	0.739795	2.46709e-40	396.078	0	1	0	-	4286	4145	3666	3714	2400	2284	2203	2267	11.8131	11.8384	11.7364	11.7714	11.3026	11.271	11.3271	11.3898	300.846	308.617	278.128	285.912	166.391	162.195	172.753	185.058
ENSMUSG00000027602	Map1lc3a	chr2:155276296-155278073	+	1181	0.738939	1.94457e-29	287.112	0.738939	1.94457e-29	287.112	0	1	0	-	1811	1703	1593	1514	974	1051	844	965	10.5569	10.5557	10.5077	10.4839	10.0312	10.105	10.0076	10.1545	67.4882	67.3175	64.1633	61.8776	35.8505	39.6244	35.1375	41.8217
ENSMUSG00000075707	Dio3	chr12:110279067-110281097	+	2030	0.738222	0.0292341	15.3411	0.738222	0.0292341	15.3411	0	1	0	-	10	12	13	13	3	4	4	8	3.06216	3.08621	3.09692	3.09968	2.99747	3.00781	3.01278	3.0575	0.216802	0.275961	0.304627	0.309104	0.0642408	0.0877353	0.0968818	0.201706
ENSMUSG00000042099	Kank3	chr17:33810519-33822918	+	3118	0.738213	9.22387e-06	50.3509	0.738213	9.22387e-06	50.3509	0	1	0	-	110	120	105	109	51	72	66	60	6.49356	6.57041	6.50706	6.539	6.17869	6.31148	6.31817	6.2977	1.55266	1.79667	1.60189	1.68736	0.711017	1.02817	1.04075	0.984917
ENSMUSG00000032679	Cd59a	chr2:104095800-104115354	+	1811	0.738062	0.0138678	18.5799	0.738062	0.0138678	18.5799	0	1	0	-	26	25	19	17	9	13	10	10	4.05546	4.059	4.01102	3.99715	3.91416	3.95171	3.9352	3.9399	0.631851	0.644443	0.499063	0.453094	0.216028	0.319621	0.271494	0.282622
ENSMUSG00000021830	Txndc16	chr14:45134447-45220328	-	10360	0.737595	1.32708e-10	98.771	0.737595	1.32708e-10	98.771	-1.11375	0.0724217	11.4013	chr14:45208024-45211240	415	432	431	353	236	288	244	171	8.43855	8.5169	8.52603	8.38965	8.04446	8.18893	8.14426	7.94253	1.76298	1.94665	1.97896	1.64465	0.990235	1.23778	1.158	0.844814
ENSMUSG00000072714	Rpl21-ps4	chr14:11227551-11227992	+	441	0.737207	0.00593321	22.2671	0.737207	0.00593321	22.2671	0	1	0	-	34	36	25	33	15	22	15	14	4.63411	4.66362	4.58086	4.65042	4.48621	4.54726	4.50308	4.50009	3.39313	3.8109	2.69663	3.61188	1.47856	2.22123	1.67236	1.62485
ENSMUSG00000006717	Acot13	chr13:24817947-24831517	-	721	0.736578	1.33051e-21	208.76	0.736578	1.33051e-21	208.76	0	1	0	-	1120	1037	964	920	662	624	480	577	9.84707	9.83207	9.78017	9.76077	9.41557	9.37876	9.25408	9.43168	68.3663	67.1439	63.6008	61.59	39.9125	38.5354	32.7329	40.9605
ENSMUSG00000091115	BC027582	chr3:103731679-103732553	-	874	0.736431	0.0323192	14.9054	0.736431	0.0323192	14.9054	0	1	0	-	10	9	10	7	2	1	5	4	2.59987	2.59557	2.60623	2.57895	2.52532	2.51566	2.56039	2.55191	0.503556	0.480722	0.544263	0.386584	0.0994729	0.0509447	0.281279	0.234247
ENSMUSG00000063172	Hspb11	chr4:107253592-107279938	+	2071	0.736348	2.74132e-16	155.62	0.736348	2.74132e-16	155.62	0	1	0	-	466	458	426	379	256	268	250	225	8.57434	8.60815	8.56157	8.48939	8.14563	8.18555	8.20785	8.16604	9.90297	10.324	9.78476	8.83318	5.37336	5.76189	5.93524	5.56067
ENSMUSG00000052566	Hook2	chr8:84990594-85003364	+	2617	0.736109	1.25898e-26	259	0.736109	1.25898e-26	259	0	1	0	-	1018	976	890	900	560	636	524	480	9.72606	9.74176	9.67343	9.70439	9.24384	9.35452	9.28134	9.24699	17.12	17.4104	16.1773	16.5996	9.30187	10.8209	9.84478	9.38776
ENSMUSG00000048458	Fam212b	chr3:105704598-105720842	+	4781	0.735754	2.21543e-07	66.5454	0.735754	2.21543e-07	66.5454	0	1	0	-	267	211	172	216	131	109	117	133	7.63073	7.50958	7.38679	7.55088	7.19355	7.10462	7.19551	7.29142	2.45783	2.06028	1.71132	2.18068	1.19107	1.01512	1.20322	1.42383
ENSMUSG00000023067	Cdkn1a	chr17:29090978-29100722	+	2223	0.735662	1.04111e-17	169.825	0.735662	1.04111e-17	169.825	0	1	0	-	1928	1571	1341	1670	982	945	985	847	10.6033	10.4712	10.3422	10.5618	10.0256	10.0047	10.1233	10.0335	38.1704	32.9913	28.6952	36.2606	19.2025	18.9279	21.7859	19.5015
ENSMUSG00000063415	Cyp26b1	chr6:84571413-84593908	-	4849	0.735416	0.0227429	16.4315	0.735416	0.0227429	16.4315	0	1	0	-	14	16	19	20	7	8	4	12	3.6308	3.65608	3.68443	3.69702	3.5692	3.5796	3.54716	3.63273	0.127068	0.154039	0.18639	0.199084	0.0627526	0.0734595	0.0405589	0.126664
ENSMUSG00000020889	Nr1d1	chr11:98767931-98775333	-	3077	0.735177	1.21604e-15	149.151	0.735177	1.21604e-15	149.151	0	1	0	-	539	453	412	431	284	295	239	243	8.73088	8.63883	8.57501	8.62964	8.25757	8.29313	8.21866	8.2597	7.7094	6.8728	6.36928	6.76095	4.01215	4.26879	3.81899	4.04207
ENSMUSG00000022340	Sybu	chr15:44671858-44788063	-	3599	0.734786	0.000652045	31.8572	0.734786	0.000652045	31.8572	0	1	0	-	101	76	79	84	35	70	52	29	6.16254	6.05799	6.08107	6.12	5.77694	6.01002	5.93498	5.77449	1.23509	0.985814	1.04416	1.12656	0.422739	0.866017	0.710395	0.412421
ENSMUSG00000060301	2610008E11Rik	chr10:79064373-79097600	-	4229	0.73449	2.00401e-16	156.981	0.73449	2.00401e-16	156.981	-1.81867	0.340298	4.6814	chr10:79088288-79088376	547	523	617	518	347	314	309	307	8.86683	8.87907	9.0273	8.90242	8.52936	8.46741	8.5286	8.55535	5.69258	5.77334	6.94014	5.91221	3.56679	3.30599	3.59252	3.71557
ENSMUSG00000036151	Tm6sf2	chr8:70072923-70080066	+	1901	0.734163	0.0114382	19.4164	0.734163	0.0114382	19.4164	0	1	0	-	25	24	24	22	11	10	14	12	4.17935	4.1827	4.18536	4.17294	4.06317	4.05542	4.10525	4.09147	0.578785	0.589376	0.600551	0.558597	0.251534	0.234222	0.362096	0.32309
ENSMUSG00000083544	Oat-rs1	chrX:75915215-75916526	+	1311	0.734092	0.0328602	14.8333	0.734092	0.0328602	14.8333	0	1	0	-	11	10	6	9	5	3	4	0	2.58953	2.58572	2.54826	2.5794	2.53535	2.5165	2.53075	2.48837	0.369275	0.356091	0.217705	0.331358	0.165788	0.101889	0.150015	0
ENSMUSG00000036411	9530077C05Rik	chr9:22411576-22444677	+	2155	0.733793	3.03093e-06	55.1842	0.733793	3.03093e-06	55.1842	0	1	0	-	161	142	123	117	72	91	84	60	6.89358	6.85409	6.78053	6.76644	6.49622	6.60419	6.61467	6.48978	3.28805	3.07613	2.71505	2.62057	1.45235	1.8802	1.91651	1.42505
ENSMUSG00000054074	Skida1	chr2:18040675-18049051	-	4927	0.733518	3.61801e-08	74.4153	0.733518	3.61801e-08	74.4153	0	1	0	-	177	190	194	168	108	113	87	109	7.22115	7.30347	7.32591	7.24933	6.95376	6.98337	6.9064	7.04122	1.58107	1.80026	1.87301	1.64583	0.952856	1.02119	0.868191	1.13232
ENSMUSG00000030830	Itgal	chr7:127296259-127335137	+	6380	0.732895	0.0145676	18.3661	0.732895	0.0145676	18.3661	0	1	0	-	20	19	31	20	13	12	10	9	4.05739	4.05868	4.16066	4.07382	3.9995	3.99205	3.98453	3.97905	0.137965	0.139026	0.231133	0.15131	0.0885745	0.0837473	0.0770651	0.0722015
ENSMUSG00000001995	Sipa1l2	chr8:125418062-125492710	-	6365	0.732721	5.10717e-22	212.918	0.732721	5.10717e-22	212.918	0	1	0	-	1130	1043	1003	993	619	659	659	488	9.87422	9.85652	9.83437	9.84706	9.38307	9.44303	9.52479	9.32139	7.81339	7.64978	7.49589	7.53024	4.22745	4.60996	5.09056	3.92415
ENSMUSG00000044139	Prss53	chr7:127885840-127890970	-	2134	0.732276	3.47833e-05	44.5863	0.732276	3.47833e-05	44.5863	0	1	0	-	85	89	94	79	53	53	46	43	6.12395	6.17217	6.20486	6.13458	5.94418	5.94875	5.9365	5.92934	1.75301	1.94697	2.09534	1.78686	1.07961	1.10584	1.05984	1.03133
ENSMUSG00000084974	Gm15567	chr7:27249262-27257932	-	2130	0.73212	4.39677e-05	43.5687	0.73212	4.39677e-05	43.5687	0	1	0	-	105	98	74	82	54	53	51	43	6.25445	6.24917	6.12573	6.18203	5.981	5.97919	6.00219	5.96002	2.16955	2.14788	1.65262	1.8582	1.10205	1.10792	1.17725	1.03327
ENSMUSG00000039607	Rbms3	chr9:116572745-117629913	-	10413	0.731931	7.58767e-27	261.199	0.731931	7.58767e-27	261.199	-1.13232	2.90875e-06	55.3629	chr9:116636368-116636480	1144	1004	1076	1013	645	678	634	514	9.89551	9.83354	9.90676	9.87506	9.42686	9.47701	9.50451	9.37287	4.83515	4.50112	4.91538	4.6956	2.69259	2.89911	2.99359	2.52646
ENSMUSG00000028602	Tnfrsf8	chr4:145267136-145315164	-	3459	0.731609	0.0334726	14.7531	0.731609	0.0334726	14.7531	0	1	0	-	17	11	6	8	6	4	1	4	2.87102	2.82434	2.7771	2.79872	2.77353	2.75481	2.72716	2.76164	0.216301	0.148459	0.0825128	0.111634	0.0754027	0.0514896	0.0142144	0.0591881
ENSMUSG00000032377	Plscr4	chr9:92457377-92493510	+	4639	0.7312	2.70409e-05	45.6798	0.7312	2.70409e-05	45.6798	-1.06079	1	0	chr9:92482640-92482864	101	104	107	78	52	61	52	54	6.32128	6.36454	6.38566	6.24664	6.05772	6.11798	6.09824	6.12777	0.958201	1.04658	1.09719	0.811574	0.487265	0.585485	0.551134	0.595791
ENSMUSG00000029166	Mapre3	chr5:30814640-30866106	+	3407	0.730962	1.69873e-23	227.699	0.730962	1.69873e-23	227.699	0	1	0	-	1102	1050	916	906	561	635	572	542	9.82478	9.83513	9.72767	9.73939	9.27671	9.38413	9.38162	9.37331	14.2354	14.3873	12.7892	12.8355	7.15775	8.29873	8.25472	8.14239
ENSMUSG00000071724	Smpd5	chr15:76294433-76296896	+	2063	0.730669	1.58894e-07	67.9889	0.730669	1.58894e-07	67.9889	0	1	0	-	220	208	152	170	122	106	95	105	7.38087	7.38283	7.19347	7.27675	7.03656	6.97123	6.96875	7.04179	4.69335	4.70682	3.50481	3.97747	2.57067	2.28779	2.26414	2.60504
ENSMUSG00000040495	Chrm4	chr2:91922188-91929829	+	2768	0.730266	0.000450225	33.4657	0.730266	0.000450225	33.4657	0	1	0	-	59	67	62	71	34	40	42	27	5.65795	5.72939	5.704	5.76886	5.49411	5.5414	5.58683	5.47969	0.938092	1.12998	1.06548	1.23808	0.533948	0.643434	0.746039	0.499255
ENSMUSG00000027227	Sord	chr2:122234748-122265340	+	2352	0.729946	1.93039e-28	277.144	0.729946	1.93039e-28	277.144	0	1	0	-	1432	1371	1313	1198	765	869	786	680	10.2247	10.2396	10.2133	10.1534	9.70345	9.81771	9.81832	9.73563	26.7957	27.2122	26.5551	24.5854	14.1387	16.451	16.431	14.7978
ENSMUSG00000048481	Mypop	chr7:18991244-19001766	+	2175	0.729888	1.07452e-16	159.688	0.729888	1.07452e-16	159.688	0	1	0	-	428	449	425	415	254	267	238	239	8.50579	8.59061	8.55802	8.55844	8.13865	8.18127	8.17261	8.20521	8.66052	9.63719	9.29502	9.20972	5.07645	5.46591	5.38017	5.62423
ENSMUSG00000029401	Rilpl2	chr5:124463264-124478366	-	1391	0.728487	1.62697e-19	187.886	0.728487	1.62697e-19	187.886	0	1	0	-	876	923	769	783	533	468	456	492	9.5241	9.62179	9.47585	9.5122	9.12889	9.03928	9.0969	9.18965	27.7164	30.9769	26.2978	27.1702	16.6566	14.9806	16.1182	18.1035
ENSMUSG00000030889	Vwa3a	chr7:120739556-120805742	+	5821	0.72825	0.0328043	14.8407	0.72825	0.0328043	14.8407	0	1	0	-	11	12	8	12	5	6	3	3	2.90684	2.92177	2.88529	2.92575	2.85262	2.86291	2.83781	2.83959	0.0831677	0.0962381	0.0653752	0.0995042	0.0373386	0.0458948	0.0253397	0.0263784
ENSMUSG00000094447	9430069I07Rik	chr15:34349175-34356421	-	336	0.727691	0.0317642	14.9806	0.727691	0.0317642	14.9806	0	1	0	-	14	12	15	10	10	6	2	3	3.17125	3.16003	3.1889	3.14503	3.13739	3.10112	3.06568	3.07824	1.83378	1.66727	2.1236	1.43654	1.29374	0.795101	0.292664	0.45699
ENSMUSG00000075410	Gm11744	chr11:116653533-116668389	+	1534	0.72747	0.00980954	20.0835	0.72747	0.00980954	20.0835	0	1	0	-	40	22	28	32	14	22	10	16	4.60519	4.48166	4.53366	4.57096	4.40603	4.47578	4.38367	4.44747	1.14761	0.669515	0.868267	1.00689	0.396724	0.638569	0.320518	0.53385
ENSMUSG00000044952	Kctd21	chr7:97332326-97350213	+	2966	0.727428	7.13015e-06	51.469	0.727428	7.13015e-06	51.469	0	1	0	-	130	112	129	141	78	81	54	78	6.72089	6.67278	6.75706	6.82204	6.47924	6.50132	6.38187	6.55017	1.929	1.76283	2.0689	2.29459	1.14317	1.21597	0.895161	1.34601
ENSMUSG00000042476	Abcb4	chr5:8893720-8959225	+	4074	0.726019	0.0313606	15.0362	0.726019	0.0313606	15.0362	0	1	0	-	13	20	12	10	5	10	6	2	3.272	3.34017	3.27102	3.25457	3.20021	3.24799	3.21722	3.17688	0.140437	0.229178	0.140114	0.118478	0.0533501	0.109292	0.0724117	0.0251266
ENSMUSG00000054679	Srsf12	chr4:33208990-33233340	+	3148	0.725783	0.0193062	17.143	0.725783	0.0193062	17.143	0	1	0	-	20	29	27	14	16	8	7	12	4.04209	4.1266	4.11339	4.00393	4.01049	3.93944	3.93869	3.9941	0.279611	0.430057	0.40799	0.21466	0.220938	0.113153	0.109331	0.195106
ENSMUSG00000031273	Col4a6	chrX:141165402-141474076	-	7973	0.725026	2.12127e-06	56.734	0.725026	2.12127e-06	56.734	0	1	0	-	4180	4024	3995	3791	2040	2816	2618	1672	11.7885	11.8094	11.8157	11.7895	11.1625	11.4531	11.478	11.1277	23.0735	23.5613	23.835	22.9504	11.1223	15.7261	16.1446	10.7334
ENSMUSG00000049929	Lpar4	chrX:106920624-106933900	+	4238	0.724554	1.91272e-06	57.1835	0.724554	1.91272e-06	57.1835	0	1	0	-	121	126	131	128	82	78	73	57	6.6751	6.72923	6.75865	6.75909	6.49402	6.47808	6.49424	6.41219	1.25656	1.38795	1.47038	1.45783	0.841083	0.81949	0.846916	0.688396
ENSMUSG00000040600	Eps8l3	chr3:107877229-107892899	+	2269	0.724296	0.00162035	27.9039	0.724296	0.00162035	27.9039	0	1	0	-	54	41	53	50	27	34	28	19	5.31637	5.24712	5.33476	5.32264	5.13007	5.18686	5.16489	5.09546	1.04742	0.843553	1.11112	1.06364	0.517268	0.667198	0.606739	0.428592
ENSMUSG00000086090	Gm12531	chr3:37052214-37060035	-	487	0.724292	0.00156392	28.0578	0.724292	0.00156392	28.0578	0	1	0	-	55	57	52	65	29	22	40	33	5.49061	5.52446	5.4964	5.58954	5.31339	5.26037	5.4286	5.38613	4.97042	5.46398	5.07919	6.44232	2.58854	2.01143	4.0384	3.46824
ENSMUSG00000097123	Gm6297	chr4:40720153-40722398	-	2146	0.723773	0.0350029	14.559	0.723773	0.0350029	14.559	0	1	0	-	8	17	7	13	5	2	4	6	2.92967	3.01768	2.92548	2.98582	2.90222	2.87311	2.89799	2.92188	0.164066	0.369813	0.155163	0.292396	0.101281	0.0414964	0.091645	0.143102
ENSMUSG00000081534	Slc48a1	chr15:97784354-97792692	+	2690	0.723582	7.67109e-46	451.151	0.723582	7.67109e-46	451.151	0	1	0	-	5345	4793	4372	4513	2933	3084	2578	2579	12.1175	12.0715	11.9984	12.0511	11.5847	11.64	11.5714	11.6094	87.449	83.1799	77.3123	80.9787	47.3964	51.0472	47.1204	49.0709
ENSMUSG00000043342	Hoxd9	chr2:74697679-74700208	+	2183	0.723423	0.00137144	28.6282	0.723423	0.00137144	28.6282	0	1	0	-	62	45	44	49	30	26	29	24	5.37852	5.28809	5.28533	5.32825	5.16591	5.13764	5.18579	5.15336	1.24996	0.962325	0.958781	1.08343	0.597384	0.53031	0.653165	0.562707
ENSMUSG00000019775	Rgs17	chr10:5825662-5922400	-	8298	0.722829	0.0163412	17.8672	0.722829	0.0163412	17.8672	0	1	0	-	18	33	33	19	18	14	8	11	4.21177	4.34469	4.348	4.23646	4.21419	4.18113	4.13585	4.17115	0.0954682	0.185654	0.189174	0.110519	0.0942942	0.0751216	0.0474018	0.0678491
ENSMUSG00000051790	Nlgn2	chr11:69823121-69837784	-	5785	0.722573	2.34089e-33	326.306	0.722573	2.34089e-33	326.306	0	1	0	-	2324	2402	2274	2108	1313	1396	1363	1267	10.9608	11.0468	11.009	10.9618	10.4732	10.5357	10.6014	10.5759	17.6804	19.3835	18.6985	17.5883	9.86614	10.7446	11.5843	11.2098
ENSMUSG00000026571	Dcaf6	chr1:165329510-165460465	-	3297	0.721952	1.45903e-33	328.359	0.721952	1.45903e-33	328.359	0	1	0	-	1134	1109	1120	1049	696	710	614	576	9.91412	9.9475	9.96859	9.93227	9.51596	9.54241	9.50716	9.4909	15.1375	15.7028	16.1592	15.3573	9.17648	9.58848	9.15646	8.94187
ENSMUSG00000097162	2310010J17Rik	chr7:90124857-90129474	-	451	0.721923	0.00971886	20.1238	0.721923	0.00971886	20.1238	0	1	0	-	32	27	26	26	12	20	14	11	4.44011	4.41447	4.40922	4.41431	4.27923	4.35068	4.31285	4.28928	3.12272	2.7948	2.74231	2.78262	1.15662	1.97453	1.52626	1.24836
ENSMUSG00000025161	Slc16a3	chr11:120948479-120960868	+	5318	0.720963	1.84164e-58	577.348	0.720963	1.84164e-58	577.348	0	1	0	-	5701	5613	5387	4904	3369	3405	3121	2836	12.2436	12.2859	12.2602	12.195	11.7787	11.7994	11.8115	11.7654	47.1805	49.2731	48.1858	44.5102	27.5384	28.5088	28.8552	27.295
ENSMUSG00000021253	Tgfb3	chr12:86056743-86079041	-	3384	0.720955	5.03784e-21	202.978	0.720955	5.03784e-21	202.978	0	1	0	-	1626	1548	1381	1466	1018	913	719	882	10.4094	10.4193	10.3291	10.4048	10.0139	9.93429	9.82319	10.0255	21.147	21.3552	19.4126	20.9104	13.0769	12.013	10.4466	13.3402
ENSMUSG00000020435	Osbp2	chr11:3703730-3863903	-	6361	0.720844	0.0269782	15.6899	0.720844	0.0269782	15.6899	0	1	0	-	16	25	15	13	5	10	5	11	3.6406	3.72601	3.6416	3.62614	3.5419	3.59032	3.54929	3.61509	0.110702	0.183475	0.112172	0.0986451	0.0341689	0.0699979	0.0386476	0.0885099
ENSMUSG00000026939	Tmem141	chr2:25620066-25622005	-	1122	0.720188	1.05525e-07	69.7664	0.720188	1.05525e-07	69.7664	0	1	0	-	231	213	181	174	137	122	88	114	7.46999	7.45518	7.35784	7.34824	7.15681	7.10097	6.99039	7.14339	9.06105	8.86237	7.67372	7.48538	5.30779	4.84147	3.85628	5.2004
ENSMUSG00000026463	Atp2b4	chr1:133702673-133801041	-	9031	0.719509	1.98788e-18	177.016	0.719509	1.98788e-18	177.016	-1.32382	2.23744e-06	56.5025	chr1:133727720-133727808	602	598	637	575	345	404	343	323	9.00681	9.05081	9.11523	9.05004	8.59033	8.71547	8.66944	8.6574	2.93373	3.09121	3.35524	3.07319	1.66062	1.99185	1.8674	1.83059
ENSMUSG00000039518	Cdsn	chr17:35552127-35557180	+	2678	0.71924	0.00351225	24.5442	0.71924	0.00351225	24.5442	0	1	0	-	55	55	41	59	42	20	19	32	5.38114	5.40179	5.3096	5.44157	5.29937	5.13372	5.14498	5.26753	0.903882	0.958772	0.728272	1.06341	0.681749	0.332529	0.348836	0.611595
ENSMUSG00000096145	Vkorc1	chr7:127893066-127895617	-	767	0.719067	6.21208e-24	232.068	0.719067	6.21208e-24	232.068	0	1	0	-	1526	1391	1205	1220	869	789	710	765	10.286	10.2566	10.1408	10.1735	9.81128	9.74306	9.73975	9.83591	87.5626	84.6633	74.733	76.7754	49.2505	45.8028	45.5136	51.0494
ENSMUSG00000050332	Amer1	chrX:95420317-95444872	-	8496	0.718783	3.9403e-25	244.045	0.718783	3.9403e-25	244.045	0	1	0	-	1000	953	938	945	564	661	514	519	9.72233	9.73274	9.73103	9.75894	9.26223	9.39813	9.27918	9.32069	5.18018	5.23651	5.25181	5.36877	2.8857	3.46415	2.97459	3.12664
ENSMUSG00000027901	Dennd2d	chr3:106482404-106503030	+	4456	0.718091	9.4971e-05	40.2241	0.718091	9.4971e-05	40.2241	0	1	0	-	96	116	112	74	55	68	49	53	6.31708	6.44276	6.43124	6.24318	6.09403	6.17835	6.09566	6.13951	0.948169	1.21528	1.19562	0.801575	0.536542	0.679476	0.540666	0.608773
ENSMUSG00000006651	Aplp1	chr7:30434980-30445582	-	2391	0.717997	1.19577e-32	319.224	0.717997	1.19577e-32	319.224	0	1	0	-	2183	2100	1885	1869	1248	1246	1055	1179	10.8367	10.8565	10.7703	10.7848	10.3572	10.3667	10.3122	10.4422	40.1822	41.0018	37.5018	37.7301	22.6893	23.2032	21.6946	25.2382
ENSMUSG00000025731	0610011F06Rik	chr17:25875463-25886007	+	1109	0.717991	4.37395e-16	153.591	0.717991	4.37395e-16	153.591	0	1	0	-	1031	982	766	839	583	516	483	532	9.71167	9.72162	9.51893	9.61767	9.24772	9.16293	9.19034	9.30001	40.9154	41.3374	32.8562	36.5164	22.8519	20.7171	21.4138	24.553
ENSMUSG00000039217	Il18	chr9:50575272-50581837	+	714	0.717685	6.22907e-15	142.056	0.717685	6.22907e-15	142.056	0	1	0	-	879	701	768	673	465	508	357	438	9.46411	9.32173	9.41121	9.31973	8.95661	9.03461	8.84597	9.03181	54.1814	45.8335	51.1662	45.4961	28.3101	31.6793	24.5838	31.3979
ENSMUSG00000055323	Gm9967	chr7:126774964-126776818	-	1854	0.717505	0.00955967	20.1956	0.717505	0.00955967	20.1956	0	1	0	-	35	31	39	21	19	13	20	13	4.62003	4.60418	4.66859	4.52962	4.49764	4.44732	4.52634	4.46741	0.830841	0.780576	1.00063	0.546723	0.445482	0.312208	0.530394	0.358887
ENSMUSG00000044317	Gpr4	chr7:19212537-19224176	+	2884	0.717246	0.0375148	14.258	0.717246	0.0375148	14.258	0	1	0	-	15	9	6	14	6	5	0	5	2.93029	2.88233	2.8543	2.93297	2.85072	2.84189	2.79401	2.84984	0.228905	0.145684	0.0989638	0.23431	0.0904361	0.0771942	0	0.0887359
ENSMUSG00000002996	Hbp1	chr12:31926253-31950535	-	6167	0.716475	5.22483e-27	262.819	0.716475	5.22483e-27	262.819	0	1	0	-	1670	1544	1582	1407	952	1076	802	830	10.4515	10.435	10.4697	10.3859	9.97772	10.0907	9.93098	9.99448	11.918	11.6879	12.2026	11.0123	6.71041	7.7687	6.39409	6.88857
ENSMUSG00000031340	Gabre	chrX:72255998-72274803	-	4736	0.716299	4.24788e-17	163.718	0.716299	4.24788e-17	163.718	0	1	0	-	624	590	584	504	363	353	292	342	9.0057	9.0089	9.01193	8.91122	8.59452	8.58367	8.52125	8.66704	5.79872	5.81572	5.86572	5.13661	3.33182	3.31874	3.03144	3.69606
ENSMUSG00000039943	Plcb4	chr2:135659010-136014593	+	8970	0.716269	1.0637e-09	89.7318	0.716269	1.0637e-09	89.7318	-1.25181	1	0	chr2:135952000-135952080	282	272	319	248	169	195	140	150	7.88391	7.90071	8.02758	7.86233	7.55904	7.65493	7.51735	7.58345	1.38362	1.4156	1.69168	1.3345	0.818993	0.967949	0.767386	0.855901
ENSMUSG00000032750	Gab3	chrX:74966842-75085458	-	3891	0.715916	0.0379744	14.2051	0.715916	0.0379744	14.2051	0	1	0	-	11	12	10	5	1	3	3	6	2.687	2.70182	2.68446	2.63704	2.59361	2.61382	2.61761	2.65171	0.12442	0.143974	0.122253	0.062025	0.0111718	0.0343297	0.0379087	0.078925
ENSMUSG00000053411	Cbx7	chr15:79915806-79971119	-	6487	0.715718	3.12027e-10	95.0581	0.715718	3.12027e-10	95.0581	0	1	0	-	303	255	249	243	150	178	156	128	7.88524	7.80439	7.79737	7.7973	7.43784	7.54673	7.52867	7.43957	2.05569	1.8351	1.8259	1.80809	1.00516	1.22176	1.18239	1.00993
ENSMUSG00000079057	Cyp4v3	chr8:45269670-45333216	-	6246	0.715058	0.000581306	32.356	0.715058	0.000581306	32.356	0	1	0	-	138	133	123	80	83	69	36	76	6.66212	6.6744	6.6381	6.43406	6.41275	6.34008	6.15774	6.44429	0.972381	0.994061	0.93675	0.618224	0.577646	0.491878	0.283386	0.622782
ENSMUSG00000021190	Lgmn	chr12:102394083-102439813	-	2323	0.71486	5.54466e-49	482.561	0.71486	5.54466e-49	482.561	0	1	0	-	4014	3732	3471	3345	2342	2357	2011	1908	11.714	11.7021	11.6474	11.6359	11.2396	11.2564	11.2062	11.1981	76.048	74.999	71.0765	69.5032	43.8252	45.1773	42.5639	42.0391
ENSMUSG00000021665	Hexb	chr13:97176331-97198357	-	1904	0.714722	9.00353e-33	320.456	0.714722	9.00353e-33	320.456	0	1	0	-	1601	1481	1454	1283	906	939	804	786	10.3788	10.3627	10.3587	10.2686	9.89934	9.93955	9.89505	9.91201	37.007	36.3121	36.326	32.525	20.6846	21.9588	20.7619	21.1291
ENSMUSG00000075514	Gm13375	chr2:20969053-20969997	+	854	0.714275	0.00348031	24.5838	0.714275	0.00348031	24.5838	0	1	0	-	38	48	49	33	25	25	20	21	5.01506	5.10259	5.11387	5.00353	4.92059	4.92332	4.90135	4.91899	1.95833	2.6239	2.72935	1.86515	1.27253	1.30344	1.15146	1.2586
ENSMUSG00000027849	Syt6	chr3:103575230-103645569	+	5828	0.713952	0.0339929	14.6861	0.713952	0.0339929	14.6861	0	1	0	-	13	17	12	10	5	4	9	4	3.21421	3.25657	3.21318	3.1967	3.14233	3.13336	3.18966	3.14075	0.098171	0.136173	0.097945	0.0828206	0.0372938	0.0305598	0.0759279	0.0351289
ENSMUSG00000048240	Gng7	chr10:80948623-81014945	-	3786	0.713935	0.000125869	39.0008	0.713935	0.000125869	39.0008	0	1	0	-	117	102	69	88	58	49	54	51	6.35827	6.3176	6.14477	6.26355	6.05453	6.00132	6.07127	6.06673	1.36008	1.25772	0.86694	1.12191	0.665937	0.57627	0.70128	0.689468
ENSMUSG00000027630	Tbl1xr1	chr3:22076651-22216594	+	8127	0.713834	1.07477e-26	259.687	0.713834	1.07477e-26	259.687	0	1	0	-	1423	1216	1380	1240	900	812	712	686	10.2162	10.1297	10.2553	10.1812	9.83307	9.75908	9.73469	9.73969	7.70609	6.985	8.07736	7.3646	4.81391	4.44873	4.30753	4.32035
ENSMUSG00000001657	Hoxc8	chr15:102990621-102994267	+	2299	0.713546	2.72995e-14	135.638	0.713546	2.72995e-14	135.638	0	1	0	-	432	402	424	405	232	287	241	217	8.49329	8.48383	8.53644	8.51948	8.05821	8.21087	8.1605	8.11943	8.26998	8.16301	8.77298	8.50303	4.38667	5.55844	5.15414	4.83109
ENSMUSG00000056476	Med12l	chr3:59006977-59318410	+	10408	0.713173	0.0203229	16.9201	0.713173	0.0203229	16.9201	0	1	0	-	20	31	24	16	9	9	10	16	4.07018	4.17056	4.11669	4.05063	3.97568	3.97695	3.99718	4.06161	0.0845712	0.139046	0.109689	0.0742011	0.037589	0.0385022	0.0472401	0.0786824
ENSMUSG00000026335	Pam	chr1:97795113-98095646	-	7998	0.713154	5.39367e-37	362.681	0.713154	5.39367e-37	362.681	-1.02053	1.43122e-12	118.443	chr1:97944616-97944680	1957	1975	1905	1704	1186	1137	1114	1021	10.704	10.7675	10.7471	10.6679	10.2787	10.2542	10.3219	10.285	10.7688	11.5279	11.3301	10.2836	6.44599	6.32979	6.84829	6.53385
ENSMUSG00000026546	Ccdc19	chr1:172521043-172545870	+	2580	0.713027	0.0383692	14.1602	0.713027	0.0383692	14.1602	0	1	0	-	7	5	11	8	2	2	3	3	2.35372	2.33793	2.39676	2.36995	2.30654	2.30688	2.32035	2.32192	0.119409	0.0904719	0.202812	0.149668	0.0336974	0.034516	0.0571715	0.059515
ENSMUSG00000097022	BC001981	chr13:100108034-100108337	-	303	0.712628	0.000448515	33.4822	0.712628	0.000448515	33.4822	0	1	0	-	89	88	95	70	34	45	54	57	6.12535	6.1474	6.19067	6.06225	5.79315	5.87535	5.97206	6.00877	12.9273	13.5582	14.9143	11.151	4.87778	6.61272	8.76253	9.62846
ENSMUSG00000032064	Dixdc1	chr9:50662751-50739517	-	9971	0.711855	1.97103e-09	87.0531	0.711855	1.97103e-09	87.0531	0	1	0	-	228	230	241	212	161	133	119	120	7.5764	7.62264	7.66438	7.59314	7.36658	7.26537	7.26137	7.29004	1.00637	1.07684	1.14974	1.02625	0.701897	0.593913	0.586795	0.615981
ENSMUSG00000070371	Prss36	chr7:127932637-127946725	-	3221	0.711551	1.44236e-05	48.4093	0.711551	1.44236e-05	48.4093	0	1	0	-	119	132	100	131	84	63	68	62	6.62017	6.7077	6.56895	6.72424	6.45959	6.34871	6.4193	6.40019	1.62598	1.91314	1.47683	1.96308	1.13364	0.870883	1.038	0.985203
ENSMUSG00000039616	Mocos	chr18:24653690-24701556	+	2884	0.711321	0.000107328	39.6929	0.711321	0.000107328	39.6929	-1.26159	1	0	chr18:24659988-24660080	110	75	88	76	58	50	45	45	6.25317	6.10068	6.17886	6.12297	5.98136	5.93469	5.93491	5.94976	1.67864	1.21403	1.45147	1.27197	0.874216	0.771942	0.767177	0.798623
ENSMUSG00000039246	Lyplal1	chr1:186087730-186117310	-	1578	0.71126	9.64153e-15	140.159	0.71126	9.64153e-15	140.159	0	1	0	-	467	435	398	407	238	284	239	242	8.5729	8.564	8.50519	8.54166	8.09408	8.2224	8.17395	8.21227	13.0248	12.869	11.9977	12.4493	6.55626	8.01349	7.44679	7.84934
ENSMUSG00000042770	Hebp1	chr6:135137518-135168215	-	1061	0.711098	7.8873e-16	151.031	0.711098	7.8873e-16	151.031	0	1	0	-	475	470	450	422	294	278	230	268	8.62956	8.66886	8.64517	8.61357	8.28235	8.25258	8.19377	8.32855	19.7032	20.6798	20.1752	19.1979	12.0453	11.6665	10.6584	12.9284
ENSMUSG00000057265	Ccdc176	chr12:84409070-84433780	+	2234	0.710472	7.88833e-05	41.0301	0.710472	7.88833e-05	41.0301	-1.00282	1	0	chr12:84426704-84427200	85	90	93	74	49	57	46	43	6.11405	6.16685	6.18866	6.09592	5.91016	5.96556	5.92817	5.92109	1.67454	1.88071	1.98025	1.59884	0.953452	1.13606	1.0124	0.985167
ENSMUSG00000086308	G630016G05Rik	chr2:116067224-116085911	+	3515	0.710358	0.0392795	14.0583	0.710358	0.0392795	14.0583	0	1	0	-	8	6	15	16	2	6	3	6	2.93025	2.91521	3.0022	3.01451	2.8732	2.91321	2.88781	2.92246	0.100167	0.0796873	0.202996	0.219711	0.0247338	0.0760039	0.0419637	0.0873676
ENSMUSG00000040536	Necab1	chr4:14952244-15149794	-	5237	0.70996	0.0102088	19.9102	0.70996	0.0102088	19.9102	0	1	0	-	35	28	25	36	17	24	11	13	4.60508	4.56588	4.54454	4.63703	4.46706	4.52727	4.42874	4.45394	0.294134	0.249597	0.227079	0.331801	0.141108	0.204051	0.103273	0.127053
ENSMUSG00000061758	Akr1b10	chr6:34384217-34396950	+	3535	0.709951	4.64218e-18	173.333	0.709951	4.64218e-18	173.333	0	1	0	-	651	603	537	555	368	391	301	325	9.05459	9.04064	8.95662	9.00364	8.61889	8.67319	8.55726	8.64384	8.10496	7.96326	7.22612	7.57812	4.52527	4.9249	4.18654	4.70564
ENSMUSG00000002409	Dyrk1b	chr7:28179468-28187294	+	2695	0.70974	2.24302e-09	86.4917	0.70974	2.24302e-09	86.4917	0	1	0	-	256	239	202	237	139	153	121	133	7.6755	7.66905	7.565	7.68955	7.3028	7.3647	7.29096	7.36831	4.18062	4.14002	3.56544	4.2447	2.24203	2.5278	2.20752	2.52591
ENSMUSG00000043510	Hscb	chr5:110829069-110839777	-	905	0.709713	2.73985e-10	95.6227	0.709713	2.73985e-10	95.6227	0	1	0	-	498	420	423	325	227	276	237	232	8.60277	8.51452	8.53103	8.34783	8.04016	8.17982	8.14528	8.16047	24.2181	21.6653	22.2337	17.3338	10.9034	13.5791	12.8759	13.1209
ENSMUSG00000059554	Ccdc28a	chr10:18213675-18234998	-	2964	0.709669	0.000371364	34.302	0.709669	0.000371364	34.302	0	1	0	-	86	65	68	57	40	41	35	39	5.88526	5.79127	5.81496	5.75527	5.61179	5.62273	5.6081	5.65222	1.27697	1.02376	1.09132	0.928227	0.586635	0.615908	0.580588	0.673459
ENSMUSG00000013236	Ptprs	chr17:56412430-56476483	-	6970	0.709508	4.38979e-41	403.576	0.709508	4.38979e-41	403.576	0	1	0	-	5414	5515	4994	4909	3073	3342	3141	2793	12.1783	12.2527	12.1722	12.1792	11.6799	11.7646	11.7989	11.7334	34.1857	36.9382	34.0829	33.9952	19.1653	21.3493	22.1571	20.5099
ENSMUSG00000010051	Hyal1	chr9:107576926-107581710	+	3777	0.709337	0.000194391	37.1132	0.709337	0.000194391	37.1132	0	1	0	-	88	86	90	73	36	51	52	51	6.11205	6.12852	6.15628	6.07207	5.80014	5.90782	5.95049	5.95931	1.0254	1.06295	1.13349	0.932897	0.414325	0.60122	0.676916	0.691111
ENSMUSG00000047250	Ptgs1	chr2:36230425-36252272	+	3884	0.708614	3.35885e-28	274.738	0.708614	3.35885e-28	274.738	0	1	0	-	6194	5448	5046	5069	3241	3713	3233	2708	12.3258	12.2614	12.2025	12.2297	11.7491	11.8802	11.8467	11.7294	70.1862	65.4819	61.8	62.9942	36.2732	42.5653	40.9265	35.6857
ENSMUSG00000074987	AI314831	chr2:105076537-105126510	-	4183	0.708416	5.32012e-08	72.7408	0.708416	5.32012e-08	72.7408	1.13803	1.91707e-13	127.174	chr2:105076536-105078456	206	199	229	171	133	121	119	97	7.40556	7.42158	7.52262	7.34968	7.15468	7.11175	7.15712	7.07557	2.1674	2.2209	2.60416	1.97318	1.38213	1.28798	1.39874	1.18688
ENSMUSG00000035594	Chrna5	chr9:54980879-55007779	+	2738	0.708161	0.0205146	16.8794	0.708161	0.0205146	16.8794	0	1	0	-	24	29	26	25	4	18	18	11	4.27825	4.33044	4.30907	4.30571	4.10355	4.23335	4.24962	4.18838	0.385778	0.494456	0.451711	0.440722	0.0635057	0.292718	0.323234	0.205629
ENSMUSG00000057143	Trim12c	chr7:104338753-104353362	-	3740	0.707371	1.69943e-05	47.697	0.707371	1.69943e-05	47.697	0	1	0	-	127	149	156	123	63	97	80	79	6.78762	6.91207	6.94781	6.82365	6.47395	6.66422	6.62223	6.63666	1.49449	1.85985	1.98415	1.58742	0.732243	1.15481	1.05171	1.08114
ENSMUSG00000019467	Arhgef25	chr10:127182520-127190054	-	2387	0.705514	5.51691e-34	332.583	0.705514	5.51691e-34	332.583	0	1	0	-	2398	2272	2077	1966	1387	1358	1168	1260	10.9684	10.9741	10.9044	10.8767	10.496	10.489	10.4472	10.5481	44.2136	44.4344	41.3909	39.7547	25.2586	25.3313	24.0585	27.0174
ENSMUSG00000031480	Thsd1	chr8:22227312-22261334	+	4422	0.704783	0.000199198	37.0071	0.704783	0.000199198	37.0071	0	1	0	-	77	95	93	91	42	64	55	42	6.11236	6.23512	6.23136	6.23237	5.90214	6.04896	6.03047	5.95356	0.766358	1.00292	1.00043	0.9933	0.412873	0.644424	0.611536	0.486133
ENSMUSG00000042784	Muc1	chr3:89229056-89233381	+	2346	0.704765	0.00528417	22.7702	0.704765	0.00528417	22.7702	1.08008	1	0	chr3:89233024-89233384	50	48	37	50	34	32	24	11	5.20362	5.20929	5.13445	5.23551	5.0964	5.0846	5.04339	4.93032	0.937997	0.955161	0.75023	1.02873	0.629995	0.60734	0.502993	0.239988
ENSMUSG00000025978	Rftn2	chr1:55170158-55226782	-	5871	0.70402	1.40405e-09	88.5262	0.70402	1.40405e-09	88.5262	0	1	0	-	297	272	281	229	145	185	158	145	7.89446	7.87402	7.90739	7.78025	7.44329	7.59484	7.56083	7.53588	2.2264	2.16282	2.27675	1.8827	1.0736	1.40304	1.32319	1.2641
ENSMUSG00000044303	Cdkn2a	chr4:89274470-89294653	-	1172	0.70392	1.19165e-24	239.239	0.70392	1.19165e-24	239.239	0	1	0	-	12187	11767	10475	10326	7308	6792	5589	6853	13.3272	13.3513	13.254	13.2637	12.8686	12.8149	12.7322	12.9518	457.645	468.707	425.155	425.268	271.055	258.036	234.469	299.28
ENSMUSG00000056204	Pgpep1	chr8:70646435-70659738	-	4882	0.703529	2.87803e-15	145.409	0.703529	2.87803e-15	145.409	0	1	0	-	916	954	779	787	617	489	442	487	9.58098	9.66895	9.50534	9.53498	9.26382	9.0923	9.09295	9.20108	8.25766	9.1225	7.59032	7.78099	5.49381	4.45986	4.45146	5.10571
ENSMUSG00000035273	Hpse	chr5:100679483-100719716	-	3516	0.703458	1.04383e-07	69.8137	0.703458	1.04383e-07	69.8137	0	1	0	-	214	208	197	162	120	113	128	95	7.40642	7.42683	7.40001	7.29124	7.07277	7.04854	7.17052	7.03631	2.6787	2.76171	2.66525	2.22394	1.48361	1.431	1.78994	1.38293
ENSMUSG00000048581	E130311K13Rik	chr3:63914683-63929472	-	2398	0.702925	6.67611e-05	41.7548	0.702925	6.67611e-05	41.7548	0	1	0	-	109	117	94	85	70	67	43	53	6.40319	6.47084	6.36571	6.32927	6.20853	6.19629	6.07709	6.16361	2.00049	2.27772	1.86466	1.71091	1.26892	1.24404	0.881653	1.13123
ENSMUSG00000054452	Aes	chr10:81559493-81566362	+	1411	0.702656	3.97238e-29	284.009	0.702656	3.97238e-29	284.009	0	1	0	-	9799	9573	8189	8699	5788	5301	4941	5491	13.0167	13.0519	12.9172	12.9975	12.5462	12.48	12.5068	12.6394	305.643	316.726	276.073	297.577	178.315	167.279	172.173	199.182
ENSMUSG00000065147	Snora31	chr14:75847904-75848034	+	130	0.701932	0.000253604	35.9584	0.701932	0.000253604	35.9584	0	1	0	-	115	86	89	68	59	59	51	35	6.29898	6.18462	6.20708	6.09836	6.01031	6.01515	6.00007	5.89624	38.9327	30.8829	32.5662	25.2478	19.7285	20.2078	19.2888	13.78
ENSMUSG00000028603	Scp2	chr4:108043838-108144998	-	3478	0.701486	2.71561e-21	205.661	0.701486	2.71561e-21	205.661	1.03284	0.999661	0.00147438	chr4:108118376-108118528	824	794	782	674	496	510	429	395	9.42483	9.4445	9.44335	9.33785	9.02377	9.05532	9.00042	8.97098	10.4269	10.6575	10.6954	9.3538	6.19924	6.52906	6.06465	5.81289
ENSMUSG00000040997	Abhd4	chr14:54254128-54269169	+	2749	0.701439	1.57671e-28	278.022	0.701439	1.57671e-28	278.022	-1.14543	0.00515399	22.8786	chr14:54254128-54254472	1653	1678	1460	1579	1054	978	848	917	10.4606	10.5288	10.4156	10.5084	10.0821	10.0306	9.99662	10.0972	26.4641	28.4958	25.2638	27.7246	16.6668	15.8407	15.167	17.0734
ENSMUSG00000079261	Gm15217	chr14:46379413-46383608	+	861	0.700815	0.00226179	26.4555	0.700815	0.00226179	26.4555	0	1	0	-	50	55	46	40	33	25	24	24	5.25766	5.30955	5.25401	5.21847	5.14411	5.08574	5.09936	5.1089	2.5558	2.9821	2.54141	2.24241	1.66608	1.29285	1.37052	1.4267
ENSMUSG00000002504	Slc9a3r2	chr17:24639281-24650305	-	2257	0.7004	1.55703e-23	228.077	0.7004	1.55703e-23	228.077	0	1	0	-	1291	1307	1079	1124	775	767	637	680	10.0799	10.1449	9.98683	10.0444	9.65745	9.65954	9.59172	9.67918	25.1741	27.0338	22.741	24.0377	14.9264	15.1312	13.8767	15.4206
ENSMUSG00000038388	Mpp6	chr6:50110240-50198598	+	2843	0.700331	7.99817e-43	420.97	0.700331	7.99817e-43	420.97	0	1	0	-	4603	4276	4419	3885	2914	2696	2328	2337	11.9294	11.9168	11.9609	11.8632	11.5267	11.4698	11.43	11.4708	71.2564	70.2141	73.938	65.9587	44.5552	42.2234	40.261	42.0733
ENSMUSG00000014198	Zfp385c	chr11:100627542-100692455	-	3101	0.699277	0.0119354	19.2316	0.699277	0.0119354	19.2316	0	1	0	-	44	48	28	24	12	24	19	20	4.84729	4.89269	4.74721	4.71928	4.59978	4.70488	4.68119	4.69844	0.624468	0.722608	0.429513	0.373566	0.168215	0.344603	0.301252	0.330106
ENSMUSG00000033720	Sfxn5	chr6:85213050-85333422	-	5743	0.699105	6.82994e-06	51.6558	0.699105	6.82994e-06	51.6558	-1.14308	1	0	chr6:85267872-85267936	182	175	163	143	107	90	71	116	7.15848	7.17097	7.1353	7.07111	6.86785	6.79129	6.73395	6.99343	1.39474	1.42253	1.35011	1.20186	0.809899	0.697773	0.607852	1.03382
ENSMUSG00000087060	2810442I21Rik	chr11:16935153-16951282	-	2426	0.698918	2.32698e-08	76.3321	0.698918	2.32698e-08	76.3321	0	1	0	-	299	275	219	219	181	149	130	135	7.84775	7.83012	7.68115	7.69759	7.52048	7.41277	7.3943	7.4407	5.42425	5.29182	4.29412	4.35724	3.2432	2.73467	2.6347	2.84818
ENSMUSG00000090639	Gm20425	chr9:103190207-103230307	-	3028	0.69832	1.0127e-27	269.945	0.69832	1.0127e-27	269.945	-1.05114	5.30627e-321	3202.75	chr9:103198784-103198864	5850	5467	5039	4473	3072	3505	3019	2815	12.2515	12.2444	12.1807	12.0923	11.6797	11.8067	11.7639	11.7403	85.0275	84.2862	79.1606	71.3018	44.1013	51.5398	49.0214	47.5825
ENSMUSG00000027713	1810062G17Rik	chr3:36475936-36482299	+	911	0.698162	0.00217864	26.6181	0.698162	0.00217864	26.6181	0	1	0	-	54	59	58	42	31	38	31	19	5.40796	5.46074	5.45935	5.35775	5.25266	5.30803	5.28164	5.18781	2.60876	3.02341	3.02852	2.2253	1.47921	1.85727	1.6731	1.06748
ENSMUSG00000045377	Tmem88	chr11:69396518-69398234	-	1582	0.697592	1.09962e-20	199.588	0.697592	1.09962e-20	199.588	0	1	0	-	1375	1222	1125	1026	767	733	629	695	10.1294	10.0775	10.0164	9.95702	9.6414	9.61519	9.57392	9.68939	38.2521	36.0602	33.8272	31.3039	21.0754	20.6304	19.5489	22.4855
ENSMUSG00000009628	Tex15	chr8:33516737-33585582	+	9622	0.69694	0.000181899	37.4017	0.69694	0.000181899	37.4017	0	1	0	-	95	95	88	92	48	74	54	37	6.24623	6.27455	6.24441	6.27718	5.98261	6.14702	6.06356	5.95531	0.434528	0.460916	0.435049	0.461509	0.216851	0.342434	0.275935	0.196816
ENSMUSG00000021807	2700060E02Rik	chr14:19811401-19823823	-	1510	0.696809	1.34306e-31	308.719	0.696809	1.34306e-31	308.719	0	1	0	-	4379	3908	3911	3405	2547	2620	2084	2088	11.833	11.7827	11.7965	11.6903	11.354	11.3901	11.2787	11.3177	127.631	120.821	123.206	108.842	73.3226	77.2564	67.8577	70.7747
ENSMUSG00000097867	1110054M08Rik	chr16:24391611-24393588	-	1603	0.696497	3.49279e-06	54.5683	0.696497	3.49279e-06	54.5683	0	1	0	-	154	131	158	125	91	80	71	89	6.92349	6.8646	6.98233	6.85964	6.6552	6.60351	6.59759	6.72046	4.22811	3.81506	4.68861	3.76387	2.46771	2.22212	2.17773	2.84172
ENSMUSG00000027954	Efna1	chr3:89271732-89281142	-	1830	0.696032	7.11978e-10	91.4753	0.696032	7.11978e-10	91.4753	0	1	0	-	540	438	394	450	301	257	221	295	8.73305	8.61279	8.54102	8.66467	8.29876	8.19905	8.16731	8.39734	12.9868	11.1734	10.2415	11.8691	7.14992	6.25305	5.93772	8.25079
ENSMUSG00000038065	2410066E13Rik	chr6:54681771-54700406	+	1710	0.696025	0.0352102	14.5333	0.696025	0.0352102	14.5333	0	1	0	-	22	15	24	17	5	20	7	4	3.84777	3.79686	3.87751	3.82046	3.69877	3.83586	3.72731	3.69867	0.566221	0.409504	0.66763	0.479856	0.127104	0.520768	0.201271	0.119726
ENSMUSG00000039648	Ccbl1	chr2:30185123-30205847	-	2923	0.695552	2.05145e-06	56.8794	0.695552	2.05145e-06	56.8794	0	1	0	-	163	158	122	134	88	85	89	75	6.97016	6.98657	6.84737	6.9129	6.65643	6.647	6.71507	6.6575	2.45425	2.52343	1.98542	2.21276	1.3087	1.29479	1.49706	1.31328
ENSMUSG00000056043	Rgs9bp	chr7:35578997-35585582	-	6585	0.69553	0.0275999	15.5909	0.69553	0.0275999	15.5909	0	1	0	-	13	0	10	7	2	3	0	0	2.13375	2.01361	2.11342	2.0862	2.03309	2.04329	2.01425	2.01466	0.0868855	0	0.0722378	0.0513098	0.0132026	0.020285	0	0
ENSMUSG00000048406	B330016D10Rik	chr4:141546188-141547892	+	1701	0.695391	0.000840789	30.7531	0.695391	0.000840789	30.7531	0	1	0	-	71	69	61	48	41	38	30	32	5.693	5.70507	5.6614	5.58389	5.50858	5.49095	5.45732	5.48535	1.83702	1.89369	1.70587	1.36206	1.04777	0.994694	0.867152	0.962876
ENSMUSG00000038797	Zscan2	chr7:80860919-80876516	+	2712	0.69534	8.72023e-06	50.5947	0.69534	8.72023e-06	50.5947	0	1	0	-	210	218	135	163	108	98	115	100	7.32742	7.39177	7.10155	7.22771	6.95064	6.90965	7.04347	6.99321	3.40792	3.75258	2.36791	2.90105	1.73109	1.60896	2.08491	1.88727
ENSMUSG00000078201	Tmem203	chr2:25255438-25256352	+	914	0.695335	4.04053e-07	63.9356	0.695335	4.04053e-07	63.9356	0	1	0	-	168	180	147	150	97	110	85	87	7.092	7.17159	7.05592	7.08232	6.8031	6.87145	6.79639	6.82835	8.08952	9.19368	7.65053	7.92142	4.6133	5.35867	4.57247	4.87189
ENSMUSG00000073650	Gm216	chr1:74362107-74369321	+	2102	0.695229	0.018245	17.3886	0.695229	0.018245	17.3886	0	1	0	-	30	28	28	18	11	13	20	9	4.33819	4.33553	4.33852	4.25792	4.183	4.20266	4.28104	4.18133	0.628128	0.621854	0.633645	0.413331	0.227481	0.275373	0.467817	0.219146
ENSMUSG00000004032	Gstm5	chr3:107895820-107898686	+	1278	0.695204	1.4302e-24	238.446	0.695204	1.4302e-24	238.446	0	1	0	-	2343	2342	1984	1985	1423	1359	1116	1273	10.9445	10.9998	10.8601	10.8829	10.5151	10.4869	10.4065	10.5542	80.6865	85.5498	73.8467	74.97	48.4016	47.3477	42.935	50.9826
ENSMUSG00000087206	Gm16175	chr7:19809608-19811872	+	248	0.695151	0.000137517	38.6164	0.695151	0.000137517	38.6164	0	1	0	-	85	84	82	74	55	42	48	42	6.0665	6.08774	6.08294	6.048	5.89942	5.81721	5.89281	5.86381	15.0844	15.8121	15.7283	14.4025	9.64044	7.54063	9.5163	8.66807
ENSMUSG00000021947	Cryl1	chr14:57275033-57398483	-	1410	0.695057	1.09115e-08	79.6211	0.695057	1.09115e-08	79.6211	0	1	0	-	212	222	204	222	153	126	116	114	7.48606	7.55641	7.50907	7.5822	7.2941	7.19319	7.20446	7.21892	6.61723	7.35016	6.88227	7.59962	4.71692	3.97889	4.04499	4.13819
ENSMUSG00000074461	Gm10699	chr8:14090460-14092590	+	2130	0.694996	0.0346856	14.5985	0.694996	0.0346856	14.5985	0	1	0	-	10	2	4	7	2	1	1	1	1.82053	1.74722	1.76794	1.79922	1.74618	1.73647	1.73805	1.73876	0.206624	0.0438343	0.0893307	0.158627	0.0408166	0.0209041	0.0230833	0.0240295
ENSMUSG00000096606	Gm4980	chr7:99624066-99627103	-	3037	0.694911	0.0447405	13.493	0.694911	0.0447405	13.493	0	1	0	-	8	7	9	14	4	7	1	2	2.67824	2.67298	2.69327	2.74269	2.64148	2.67087	2.61454	2.62669	0.115932	0.107601	0.140967	0.222506	0.0572534	0.102627	0.0161895	0.0337062
ENSMUSG00000041351	Rap1gap	chr4:137664725-137729861	+	6429	0.694003	6.44589e-09	81.9072	0.694003	6.44589e-09	81.9072	-1.22273	1	0	chr4:137719328-137719392	262	254	216	198	139	149	137	124	7.69096	7.71085	7.60878	7.56718	7.30216	7.34876	7.35947	7.32809	1.79357	1.84439	1.5982	1.48655	0.939847	1.03194	1.04774	0.987195
ENSMUSG00000035878	Hykk	chr9:54917282-54949924	+	8936	0.693793	7.10553e-06	51.484	0.693793	7.10553e-06	51.484	0	1	0	-	129	117	127	126	66	82	66	77	6.70549	6.68475	6.73707	6.74606	6.4004	6.49573	6.44785	6.53319	0.63534	0.611232	0.676053	0.680589	0.32106	0.408584	0.363144	0.441034
ENSMUSG00000039795	Zfand1	chr3:10339952-10351317	-	6267	0.693586	6.11106e-07	62.1388	0.693586	6.11106e-07	62.1388	0	1	0	-	198	180	196	155	135	120	90	85	7.29811	7.27514	7.33886	7.20612	7.07776	7.02109	6.92891	6.92326	1.39048	1.34084	1.48771	1.19379	0.936397	0.852573	0.706092	0.694199
ENSMUSG00000087408	Cers1	chr8:70315786-70331587	+	3154	0.692791	4.62963e-08	73.3445	0.692791	4.62963e-08	73.3445	0	1	0	-	216	223	196	172	134	118	106	118	7.44425	7.50538	7.4285	7.36044	7.16432	7.10336	7.10173	7.1821	3.01406	3.3007	2.95607	2.63223	1.84684	1.66583	1.65243	1.91489
ENSMUSG00000034758	Tle6	chr10:81590903-81601073	-	3088	0.691388	6.02943e-05	42.1972	0.691388	6.02943e-05	42.1972	0	1	0	-	149	169	97	145	90	97	73	66	6.88417	6.99554	6.69356	6.92503	6.62949	6.67096	6.58856	6.56509	2.12358	2.55489	1.49422	2.26646	1.26693	1.39864	1.16232	1.09393
ENSMUSG00000031539	Ap3m2	chr8:22787353-22805654	-	3467	0.69088	1.28496e-07	68.9111	0.69088	1.28496e-07	68.9111	0	1	0	-	231	198	240	193	147	109	126	126	7.54318	7.48047	7.61951	7.48865	7.27104	7.11821	7.24937	7.27391	2.93236	2.66609	3.2929	2.68696	1.8431	1.39985	1.78688	1.86012
ENSMUSG00000028807	Zbtb8a	chr4:129353627-129378116	-	2321	0.690502	4.93978e-13	123.063	0.690502	4.93978e-13	123.063	0	1	0	-	391	386	390	344	238	214	229	219	8.35452	8.39061	8.40933	8.33168	8.0108	7.95024	8.06193	8.06124	7.41415	7.76382	7.993	7.15387	4.45746	4.10534	4.85108	4.8294
ENSMUSG00000098318	RP23-45G16.5	chr6:134929091-134951718	+	708	0.690201	1.1775e-10	99.2904	0.690201	1.1775e-10	99.2904	0	1	0	-	340	314	304	287	220	167	170	183	8.10663	8.09182	8.07813	8.0538	7.81255	7.64943	7.72234	7.79593	21.1351	20.7043	20.4249	19.5662	13.5075	10.5025	11.8058	13.2295
ENSMUSG00000085733	Gm11641	chr11:103363212-103364651	+	923	0.690191	0.0463233	13.342	0.690191	0.0463233	13.342	0	1	0	-	10	11	6	8	3	4	2	4	2.59318	2.60764	2.5608	2.58218	2.52853	2.5388	2.522	2.54526	0.476824	0.556358	0.309222	0.418356	0.141288	0.192961	0.106539	0.221811
ENSMUSG00000074281	Gm12522	chr3:108379276-108383741	-	2439	0.68961	0.0465741	13.3186	0.68961	0.0465741	13.3186	0	1	0	-	7	14	11	6	4	2	6	2	2.67524	2.74459	2.71849	2.67179	2.64768	2.62852	2.67365	2.63289	0.126312	0.267966	0.214537	0.11874	0.0712909	0.0365114	0.120953	0.0419704
ENSMUSG00000047146	Tet1	chr10:62804569-62899118	-	14710	0.688873	0.00556596	22.5446	0.688873	0.00556596	22.5446	0	1	0	-	50	45	32	38	29	24	23	15	5.07731	5.06218	4.97077	5.02289	4.93369	4.89723	4.90966	4.84536	0.149595	0.142811	0.10348	0.124689	0.0856981	0.0726455	0.0768765	0.0521919
ENSMUSG00000015243	Abca1	chr4:53030786-53159895	-	10363	0.68853	1.16536e-08	79.3354	0.68853	1.16536e-08	79.3354	-1.17302	1	0	chr4:53038616-53038760	540	463	496	496	278	354	345	209	8.79436	8.71879	8.78519	8.80497	8.30824	8.48876	8.54466	8.22585	2.29334	2.08573	2.27676	2.31022	1.16613	1.521	1.63686	1.03225
ENSMUSG00000097503	3110045C21Rik	chr1:169969408-169972395	+	1134	0.688124	3.81596e-05	44.184	0.688124	3.81596e-05	44.184	0	1	0	-	117	101	109	102	55	61	63	70	6.50724	6.46215	6.50812	6.48623	6.18616	6.22831	6.28111	6.34307	4.5408	4.15788	4.57229	4.34155	2.10832	2.39512	2.73153	3.15944
ENSMUSG00000098536	HOTAIRM1_4	chr6:52162009-52162111	+	102	0.688071	0.00100467	29.9798	0.688071	0.00100467	29.9798	0	1	0	-	87	69	64	60	32	39	38	49	5.90974	5.8346	5.80974	5.79393	5.57243	5.62748	5.65037	5.74601	37.5386	31.58	29.847	28.3928	13.6375	17.0245	18.3173	24.5878
ENSMUSG00000026443	Lrrn2	chr1:132880272-132940005	+	3595	0.687794	0.042868	13.6787	0.687794	0.042868	13.6787	0	1	0	-	10	14	11	11	6	6	4	4	3.03296	3.07514	3.04905	3.05148	2.9972	2.99799	2.98361	2.9858	0.122422	0.181799	0.145551	0.14769	0.0725502	0.0743126	0.0547066	0.056949
ENSMUSG00000042312	S100a13	chr3:90514434-90524581	+	715	0.687434	5.52986e-14	132.573	0.687434	5.52986e-14	132.573	0	1	0	-	539	467	495	409	312	288	259	282	8.76849	8.70111	8.75911	8.62674	8.36308	8.31614	8.31352	8.40374	33.1774	30.4912	32.9321	27.6105	18.9686	17.9348	17.8103	20.1868
ENSMUSG00000038055	Dexi	chr16:10502530-10543054	-	3353	0.686907	4.56099e-15	143.409	0.686907	4.56099e-15	143.409	0	1	0	-	498	490	429	435	293	298	285	234	8.68507	8.72017	8.62523	8.65545	8.2986	8.31955	8.35993	8.25369	6.53665	6.82222	6.08617	6.26201	3.79857	3.95724	4.17917	3.57196
ENSMUSG00000037752	Xkr8	chr4:132724896-132732546	-	4312	0.686647	3.40491e-08	74.6789	0.686647	3.40491e-08	74.6789	0	1	0	-	278	221	248	241	171	158	154	105	7.78115	7.66358	7.7522	7.74911	7.47138	7.43215	7.47759	7.28954	2.83743	2.39264	2.73586	2.69771	1.72387	1.63151	1.75598	1.24634
ENSMUSG00000096995	2810029C07Rik	chr12:111572320-111574402	-	1950	0.686309	0.0145	18.3863	0.686309	0.0145	18.3863	0	1	0	-	25	28	28	27	11	15	15	16	4.37331	4.40952	4.41253	4.40962	4.2572	4.29462	4.30927	4.32538	0.564241	0.670327	0.683037	0.668324	0.245213	0.342505	0.378212	0.419962
ENSMUSG00000039328	Rnf122	chr8:31111819-31131482	+	7080	0.685959	4.97844e-16	153.029	0.685959	4.97844e-16	153.029	0	1	0	-	738	747	735	615	451	418	388	440	9.28408	9.34538	9.34341	9.21388	8.90145	8.85421	8.87464	9.00358	4.58757	4.9255	4.93827	4.19276	2.76904	2.62877	2.69449	3.18086
ENSMUSG00000027555	Car13	chr3:14641726-14663002	+	2299	0.685853	3.13495e-10	95.0377	0.685853	3.13495e-10	95.0377	0	1	0	-	341	329	353	276	181	206	200	186	8.14108	8.15889	8.2226	8.05812	7.72313	7.81167	7.85841	7.83976	6.52792	6.68067	7.30392	5.79466	3.42236	3.98968	4.2773	4.14094
ENSMUSG00000039114	Nrn1	chr13:36725624-36734477	-	1766	0.685755	2.1436e-24	236.689	0.685755	2.1436e-24	236.689	0	1	0	-	1876	2034	1829	1615	1216	1110	1041	1057	10.656	10.7852	10.7004	10.6098	10.2893	10.2237	10.2545	10.3037	46.7522	53.7679	49.2656	44.1407	29.9315	27.9861	28.9827	30.6344
ENSMUSG00000029206	Nsun7	chr5:66259911-66298016	+	5363	0.685281	0.0274028	15.622	0.685281	0.0274028	15.622	0	1	0	-	21	25	18	19	7	8	16	10	3.97214	4.01581	3.95851	3.97129	3.85085	3.86142	3.94859	3.89548	0.172334	0.217618	0.159656	0.171003	0.0567383	0.066419	0.146687	0.095437
ENSMUSG00000039577	Nphp4	chr4:152476705-152563183	+	6044	0.685208	8.39557e-09	80.7595	0.685208	8.39557e-09	80.7595	0	1	0	-	323	294	283	281	154	191	206	150	8.02861	8.00334	7.98569	7.99816	7.55295	7.68943	7.80344	7.63172	2.352	2.27084	2.22732	2.24409	1.1076	1.40708	1.6758	1.27026
ENSMUSG00000098041	Gm26981	chr7:92729839-92733748	+	3169	0.685191	0.0345071	14.6209	0.685191	0.0345071	14.6209	0	1	0	-	19	15	16	15	11	5	10	5	3.61263	3.58662	3.59741	3.59164	3.54554	3.49069	3.54762	3.4999	0.263871	0.220969	0.24017	0.228469	0.150889	0.0702519	0.155152	0.0807556
ENSMUSG00000079437	Tmem179b	chr19:8772521-8774467	-	848	0.685142	8.6459e-15	140.632	0.685142	8.6459e-15	140.632	0	1	0	-	534	477	458	404	297	300	261	264	8.74862	8.70569	8.68425	8.60466	8.31558	8.33175	8.30585	8.34418	27.7144	26.2595	25.6915	22.9955	15.2246	15.752	15.1329	15.9343
ENSMUSG00000039377	Hlx	chr1:184727139-184732619	-	2278	0.684992	3.09559e-07	65.0926	0.684992	3.09559e-07	65.0926	0	1	0	-	227	257	248	182	159	123	127	132	7.57842	7.70242	7.68739	7.49884	7.36591	7.2333	7.3047	7.35043	4.38563	5.26675	5.17867	3.85634	3.0341	2.40415	2.74112	2.96582
ENSMUSG00000033256	Shf	chr2:122348891-122369162	-	2305	0.684893	5.50005e-09	82.5963	0.684893	5.50005e-09	82.5963	0	1	0	-	385	321	312	321	221	219	146	211	8.25228	8.16002	8.14921	8.18846	7.86844	7.87102	7.68623	7.94238	7.35105	6.50126	6.43879	6.7219	4.1678	4.23042	3.1143	4.68529
ENSMUSG00000020176	Grb10	chr11:11930507-12038683	-	9089	0.684582	1.87673e-98	977.266	0.684582	1.87673e-98	977.266	0	1	0	-	21015	19764	19926	19228	12917	12611	11415	11407	14.1372	14.1362	14.1573	14.1467	13.7014	13.6915	13.6925	13.7305	101.759	101.513	104.286	102.112	61.7777	61.7794	61.7502	64.2362
ENSMUSG00000024352	Spata24	chr18:35656689-35662186	-	967	0.684413	1.89345e-09	87.2275	0.684413	1.89345e-09	87.2275	0	1	0	-	322	337	296	295	235	183	150	179	8.06948	8.14779	8.06171	8.07704	7.85927	7.70753	7.65075	7.78505	14.6551	16.2692	14.5608	14.7249	10.564	8.42626	7.62681	9.47439
ENSMUSG00000059456	Ptk2b	chr14:66153256-66281052	-	7398	0.684094	6.95481e-16	151.577	0.684094	6.95481e-16	151.577	0	1	0	-	670	639	559	662	374	397	390	357	9.13277	9.1433	9.04424	9.20536	8.68819	8.74158	8.80431	8.77059	3.98584	4.03227	3.59433	4.31918	2.19757	2.38939	2.59196	2.4699
ENSMUSG00000040860	Crocc	chr4:141016636-141060550	-	8266	0.683856	9.99206e-12	110.003	0.683856	9.99206e-12	110.003	-1.07784	0.521753	2.82535	chr4:141058064-141058192	541	538	482	457	286	299	281	336	8.80821	8.85253	8.77452	8.75143	8.34103	8.38083	8.40893	8.57013	2.88046	3.03844	2.77378	2.66857	1.50403	1.61059	1.67143	2.0805
[truncated: 14,721 more rows]
